# Supplementary material for: Pharmacological Investigations of the Dissociative ‘Legal Highs’ Diphenidine, Methoxphenidine and Analogues
Source: PLoS One. 2016 Jun 17;11(6):e0157021. doi: 10.1371/journal.pone.0157021 (PMC4912077; doi:10.1371/journal.pone.0157021)
Supplement: S1 File — (XLSX) [file pone.0157021.s014.xlsx]

## Sheet: Sheet1
	Diphenidine				2-MeO-DPH				3-MeO-DPH				4-MeO-DPH				2-Cl-DPH				Memantine				Ketamine				MK-801
Assay 1	Count1	Count2	Count3
Total	966.63	1008.08	1016.29		987.89	1001.97	1017.93		1001.41	1019.74	1023.32		1046.43	1044.76	1035.97		1019.32	1009.15	1018.73		1073.05	1084	1085.19		1109.25	1164.68	1178.87		1115.14	1111.22	1146.54
Non-spec	33.13	31	31.51		37.88	34.5	31.01		31.88	34.75	32.26		38	37.13	42.76		31.5	34.38	34.51		39.38	36	38.51		40.63	41.88	41.5		32.75	40.63	36.51
0.0001	34.38	33.75	35.63		34.38	34.75	33.38		32.25	31.75	31.13		42.13	44.38	47.39		32.5	36.63	34.88		51.25	47.76	56.64		51.88	56.5	53.26		33.63	35.63	34.01
1e-05	40.75	39.88	42.63		62.38	48.75	42.01		40.63	39.25	38.26		100.01	103.01	97.4		43.38	43.51	42.13		110.26	107.39	111.65		100.75	107.38	105.26		42.63	41.88	37.26
1e-06	64.75	60.76	64.76		84.25	83.51	82.64		62.75	59.38	61.14		403.02	418.18	417.09		55.75	60.26	59.14		444.52	454.43	447.08		386.5	393.9	390.79		45.63	46.5	51.01
1e-07	219.13	228.89	221.91		322.88	340.03	339.94		252.63	235.65	232.17		886.8	871.87	899.94		132.76	131.14	131.03		962.3	956.24	950.05		892.5	921.67	949.1		62.25	63.26	67.51
1e-08	705.25	704.19	702.12		824.52	838.09	836.65		736.4	743.21	731.52		988.8	974.88	996.73		516.66	528.71	524.75		1082.18	1094.51	1083.07		1092.63	1150.44	1142.49		173.63	171.26	184.53
1e-09	946.13	979.59	978.92		999.15	1021.23	1005.44		929.41	948.36	998.45		1009.81	1028.14	1027.6		916.32	936.27	915.34		1109.94	1139.64	1142.59		1124.13	1154.06	1148.37		575.26	594.43	583.84
1e-10	991.76	1009.59	1017.42		942.27	965.73	962.43		1003.17	1007.25	1018.83		1042.18	1040.64	1051.98		991.32	1008.9	988.86		1065.06	1043.88	1048.07		1070.26	1116.56	1166.75		931.65	947.33	954.4
duplicate
Total	1016.38	1020.34	1029.55		1014.03	1026.36	1034.07		991.54	1009.62	1041.96		995.31	960.26	952.71		998.82	1018.03	1011.11		1134.06	1132.64	1136.71		1116.01	1129.69	1159.62		1008.9	1057.97	1065.41
Non-spec	35.38	33.75	32.88		35.63	36.5	34.63		38.25	34.63	30.63		39.25	40.51	44.01		34.88	33.26	34.13		41.13	43.51	45.01		46.75	46.5	42		37.25	34	31.63
0.0001	31.5	32.88	35.13		39.88	34.63	35.01		31.88	30.88	32.13		449	46.01	51.64		43.38	40.13	39.26		54.88	51.76	50.13		63.63	60.13	65.38		44.63	44	46.38
1e-05	49.75	50.88	47.88		46	46.88	45.01		40.38	40.76	39.51		102.13	98.26	98.15		44.38	45.26	43.64		105.38	113.14	105.65		106.38	105.51	112.26		42.13	45	40.01
1e-06	63	65.76	57.76		87.38	83.88	89.77		67.88	68.38	70.89		406.52	415.81	408.47		51.63	51.13	54.26		442.4	454.31	455.21		387.38	381.65	394.54		53.25	52.5	48.88
1e-07	216.5	215.15	217.79		345.76	330.54	340.82		235.89	235.53	236.05		874.68	884.25	911.2		147.01	144.02	143.78		911.81	906.24	895.8		953.64	989.56	1002.61		67.5	65.38	66.76
1e-08	691.76	710.82	703.25		815.77	837.34	843.79		690.66	723.84	720.78		1025.19	1029.27	1018.98		539.54	539.59	571.89		1066.69	1112.89	1080.08		1097.27	1132.7	1134		183.76	185.39	197.66
1e-09	997.76	980.34	971.42		1004.66	1029.99	1029.45		969.42	953.5	970.33		1018.19	1037.9	1051.11		951.95	945.9	951.36		1130.95	1128.89	1113.84		1153.77	1159.45	1163.13		605.77	607.06	600.22
1e-10	994.52	1012.22	1003.18		1036	1032.49	1040.7		984.55	990.63	979.83		1001.81	994.52	1035.48		984.08	975.53	981.86		1129.82	1158.52	1138.1		1135.52	1173.08	1177.38		974.41	978.47	994.79
Assay 2
Total	1018.75	1071.84	1074.67		1071.64	1074.86	1088.07		1078.66	1080.37	1088.09		1088.3	1097.64	1089.73		1072.57	1097.41	1087.87		1031.8	1020.62	1053.69		1128.66	1144.86	1144.69		760	750	740
Non-spec	36	37	33.76		33.75	33.63	33.88		31.75	38.63	35.76		38.75	36.5	38.01		37.5	35.63	34.63		41.88	42.13	42.76		44.25	45.63	46.38		36	36.13	34.76
0.0001	36.5	36.38	37.26		36.63	32.38	34.13		31.88	39	35.51		47.13	46.63	49.14		40.13	40.01	44.51		46.25	49.51	51.26		58.25	60.01	63.76		28	35.13	35.13
1e-05	46.88	49.88	49.63		44.75	44.38	45.76		50.25	44.88	49.63		122.13	115.52	115.02		48.13	50.63	47.76		107.26	109.01	112.52		114.63	109.76	109.14		38	38.75	34.38
1e-06	74.75	80.13	73.26		91.13	102.64	96.27		74.38	71.51	75.89		478.9	482.56	477.23		79.01	78.14	79.89		449.15	450.05	453.83		426.52	425.17	427.7		43.88	40.88	45.51
1e-07	240.88	267.02	268.42		391.51	396.17	403.82		268.89	272.78	261.3		949.8	955.88	938.2		226.02	223.91	226.68		904.67	951.99	951.05		962.04	941.6	959.79		57.5	62.88	65.88
1e-08	786.5	794.94	807.01		901.02	903.09	893.91		781.03	803.72	806.41		1079.93	1074.52	1086.99		736.68	735.11	734.17		1044.06	1016.37	1038.32		1090.54	1090.61	1108.44		156.5	166.14	166.65
1e-09	975.38	993.71	997.92		1029.77	1043.73	1060.2		1035.79	1050.75	1042.33		1089.81	1082.9	1109.87		1030.82	1038.91	1061.5		1019.43	1053.13	1066.95		1156.55	1119.62	1138.07		501.01	517.67	514.08
1e-10	1026.63	1040.22	1038.05		1013.9	1030.61	1019.31		1074.17	1061.75	1063.59		1096.81	1076.65	1093.86		1061.45	1058.79	1074.13		988.56	1001.25	1040.82		1115.42	1131.62	1127.13		534.14	542.42	525.58
duplicate
Total	1064.51	1030.34	1049.05		1068.4	1094.99	1080.83		1067.04	1059	1062.47		1088.19	1116.15	1101.62		1101.33	1087.54	1084.38		1013.31	1026.5	1039.44		1128.42	1144.37	1123.69		763.52	747.94	742.24
Non-spec	39.38	36.75	39.01		36.88	34.63	41.88		36.25	39.88	37.13		37.5	41.63	40.88		41.13	40.38	36.76		48.63	52.63	47.38		45.88	42	40.76		32.25	32.88	31.88
0.0001	35.38	37.38	38.38		35.5	35.5	40.88		40.25	41.01	39.26		44.63	47.88	51.01		45	46.01	46.01		48	52.13	51.88		63.88	63.26	67.39		36.63	35.25	33.26
1e-05	50.75	55.01	49.76		49.13	52.13	52.38		45	47.76	47.63		129.88	119.02	123.03		55.88	54.76	52.64		109.88	112.39	114.4		112.63	114.14	116.9		40.38	39	39.38
1e-06	76.38	73.13	79.76		101.25	102.01	96.77		77.75	76.01	73.64		483.4	485.32	494.86		70.38	71.51	77.27		454.4	454.56	465.46		448.02	447.3	439.45		42.75	44.13	43.38
1e-07	250.88	270.28	256.67		393.89	402.17	393.95		254.76	255.16	254.05		933.06	950.01	957.71		224.27	225.79	227.05		915.56	936.74	951.18		963.29	977.11	978.8		58	55.63	58.88
1e-08	769.14	777.57	781.01		902.53	901.98	903.55		784.16	770.1	758.03		1055.44	1069.65	1063.36		740.18	742.37	745.43		1050.57	1076.51	1080.58		1098.3	1096.75	1117.2		327.01	349.66	334.05
1e-09	1007.14	1010.85	1030.31		1045.66	1060.37	1058.58		1023.05	1024.51	1046.59		1078.44	1064.78	1073.24		1016.96	1012.54	1010.24		1061.32	1069.14	1057.45		1135.93	1121.75	1119.57		511.27	518.42	515.46
1e-10	1028.39	1055.98	1053.06		940.66	940.11	933.31		1070.3	1080.39	1064.47		1100.7	1083.03	1116.13		1087.71	1075.67	1088.39		977.44	1004.38	1025.07		1137.93	1157.38	1157.33		589.39	590.93	594.22
Assay 3
Total	941	954.95	962.16		931.64	933.72	968.82		806.78	822.47	842.79		860.54	835.48	865.06		769.68	784.74	788.43		1111.02	1120.22	1132.8		1047.78	1072.85	1080.68		619.64	623.93	625.84
Non-spec	48.38	48.63	44.13		38.75	36.63	40.14		40.38	41.25	42.63		53.88	51.63	48.14		47	43.88	42.76		36.13	36.63	36.88		48.38	42.13	46.76		41.25	39.38	39.01
0.0001	44	43.5	50.26		35.13	43	40.14		38.75	42.75	48.13		58	51.51	51.14		48.88	53.88	51.64		44.13	46.5	49.01		56.63	59.76	59.76		42.13	37.13	42.13
1e-05	55	53.5	54.01		50.25	51.63	48.64		49.25	55.38	51.64		110.38	115.27	111.65		54.88	57.38	58.76		116.5	121.76	135.9		121.63	124.01	120.02		43.13	44.38	48.76
1e-06	81.25	83.76	74.76		98.75	100.26	105.41		81.5	73.38	76.77		400.27	394.05	413.84		76.51	80.14	80.02		515.64	523.3	527.33		439.39	429.42	443.32		54	63.51	61.63
1e-07	245.5	238.15	239.54		400.38	399.67	395.63		236.38	233.15	244.55		804.79	813.48	816.68		145.39	146.9	158.04		1000.27	1003.84	998.28		928.66	930.35	924.78		69.5	67.88	62.13
1e-08	735.38	722.94	712.49		838.27	813.83	841.28		683.4	682.46	690.89		866.67	856.24	864.31		535.29	540.58	535.87		1113.9	1150.98	1145.18		1066.04	1084.86	1079.31		166.13	162.64	165.15
1e-09	933.51	955.08	950.04		894.15	912.09	922.93		825.52	841.73	832.29		874.3	865.87	863.94		851.81	837.25	844.57		1141.28	1151.98	1140.18		1085.79	1081.49	1075.56		457.26	472.42	466.32
1e-10	957.51	985.71	967.41		899.15	891.22	908.05		836.91	859.1	842.42		859.3	870.12	858.06		786.31	797.75	819.69		1154.15	1139.6	1145.18		1031.92	1073.36	1072.06		501.14	494.79	481.82
duplicate
Total	958.63	970.21	964.91		945.52	938.22	924.69		836.28	826.98	831.229		839.92	842.24	841.81		774.43	801.25	807.32		1192.78	1161.61	1187.44		1036.42	1050.36	1084.31		670.77	677.06	662.6
Non-spec	41.5	50.38	49.51		42.25	43.88	41.64		43.25	41.51	41.76		46.38	51.26	49.01		44.75	47.01	44.39		39.13	39.75	37.88		44	43.13	45.13		39.88	38.38	40.51
0.0001	49.5	50.75	48.26		45.38	43.25	39.64		45.25	47.01	40.01		58.25	54.51	61.89		48.38	49.88	54.51		50.38	47	48.13		71.13	69.63	70.51		41.75	47	43.76
1e-05	65.88	60.38	65.51		51.63	51	51.89		51.63	52.76	54.14		113.26	114.64	113.9		55.25	57.76	56.01		116.63	125.01	127.15		118.63	122.64	121.27		50.25	50.25	51.51
1e-06	80.5	81.51	84.64		101.75	98	96.16		75.75	79.01	81.77		402.52	402.06	406.84		65.63	69.39	68.89		514.51	529.18	519.46		436.14	440.05	438.95		51.13	52.75	53.51
1e-07	242.5	232.52	242.17		382.26	391.48	397.01		254.01	248.91	241.8		786.42	778.74	771.55		156.89	146.65	143.53		1028.03	1012.1	1053.42		897.79	935.98	940.16		68.38	75.51	73.76
1e-08	711.13	719.44	728.63		796.4	839.72	817.65		691.91	684.84	683.27		845.93	815.99	835.69		434.53	443.95	458.11		1123.16	1123.11	1145.44		1062.3	1098.75	1118.07		167.01	167.77	167.4
1e-09	919.76	954.09	951.04		934.53	948.87	946.95		828.91	850.23	850.43		872.93	892.38	867.2		734.56	746.12	731.3		1162.04	1168.86	1189.82		1100.68	1093	1108.32		465.26	483.55	473.08
1e-10	961.52	975.22	974.42		938.28	946	964.71		863.54	865.86	848.55		853.68	824.99	851.94		795.94	790.25	804.32		1177.41	1175.87	1174.07		1063.8	1062.62	1093.94		518.02	486.3	489.2
Assay 4																									1016.25	1018.57	1025.64
Total	922.25	944.95	962.68						982.03	973.63	991.34		1018.8	983.15	996.86		972.06	968.29	986.25		964.38	1041.44	1045.89		34.63	38.13	38.51
Non-spec	38	44.13	37.89						36.88	34.76	36.89		41.5	40.51	38.01		41	43.64	39.51		33.63	33.13	36		53.13	57.5	59.13
0.0001	41.63	39.75	39.26						37.75	42.26	37.39		47	50.76	48.27		45.13	44.64	48.64		33	36	38.01		107.63	105.51	105.76
1e-05	46.13	45.63	46.26						48.25	54.26	51.39		125.88	121.41	120.67		43.13	45.76	39.64		118.63	135.63	147.14		416.88	447.66	430.81
1e-06	78.38	81.13	73.4						72	74.77	78.03		475.52	475.76	462.54		59	58.27	63.4		336.75	354.02	362.92		964	966.32	984.51
1e-07	274.75	268.52	270.59						282.64	286.58	279.47		876.67	856.62	876.32		158.39	159.92	156.81		839.88	895.44	896.87		1097.38	1105.21	1098.4
1e-08	726.88	753.19	757.74						736.4	755.08	744.14		944.05	955.02	967.48		578.04	573.55	554.46		1037.76	1073.83	1054.89		1116.38	1157.96	1150.91
1e-09	888.51	907.95	936.17						931.29	971.89	979.84		971.05	939.39	954.1		919.07	953.03	925.1		1041.51	1066.83	1094.02		1139.13	1145.59	1149.04
1e-10	911.13	952.08	696.81						966.04	965.39	968.09		955.55	945.02	970.36		944.82	960.54	967.12		1042.26	1098.83	1102.15
duplicate																									1127.38	1170.09	1141.66
Total	903.63	954.71	964.18						980	1000	995		932.8	947.65	967.98		969.82	959.29	982.75		1091.26	1125.83	1146.91		32.63	37	36.63
Non-spec	45.5	43	38.39						39.38	38.39	41.26		40.75	36.89	42.89		40.88	43.89	40.02		36.5	31.25	35		58.13	65.38	60.63
0.0001	40.75	40.63	42.01						44.25	44.51	45.89		49.25	49.51	53.02		41.88	46.51	46.52		38.25	39.13	40.26		105.63	110.76	110.64
1e-05	45.13	45.63	49.52						47.88	50.64	48.27		123.13	113.91	120.54		47.5	42.76	46.52		85.13	83.13	84.26		435.26	445.16	445.19
1e-06	70.75	77.63	76.15						76.75	83.65	81.78		458.28	461.01	456.29		65.13	63.14	64.65		351.75	366.4	369.68		982.64	968.33	988.89
1e-07	268.88	273.9	279.84						303.89	306.08	304.36		880.55	849.75	865.07		157.14	155.17	151.81		1020.39	913.7	922.26		1134.27	1116.97	1129.54
1e-08	732.14	757.7	759.87						764.91	783.84	789.41		950.93	963.91	956.23		561.29	578.68	580.1		1087.39	1116.34	1106.53		1137.27	1166.22	1156.17
1e-09	900.64	911.71	930.3						942.67	957.64	967.1		960.44	948.9	949.23		913.45	920.66	916.23		1107.02	1157.22	1154.79		1146.39	1137.97	1170.3
1e-10	917.01	939.84	972.82						952.8	973.9	969.72		968.81	968.54	979.49		922.2	910.66	937.99		1097.39	1124.22	1139.79
Assay 5
Total																					733.75	779.3	753.97
Non-spec																					33.25	38.5	33.38
0.0001																					44.88	48	49.26
1e-05																					93.35	90.01	92.51
1e-06																					331.63	336.77	346.8
1e-07																					666.63	659.17	659.71
1e-08																					721.5	731.43	751.6
1e-09																					741.26	757.55	751.48
1e-10																					750.38	761.68	764.1
duplicate
Total																					760	780	750
Non-spec																					49.13	52.5	47.88
0.0001																					46.63	46.38	48.38
1e-05																					102.5	90.88	96.39
1e-06																					328	342.65	327.17
1e-07																					661.38	654.55	655.34
1e-08																					752.64	776.56	789.49
1e-09																					767.26	767.56	777.86
1e-10																					767.64	756.56	765.36
Assay 6
Total																					730	760	755
Non-spec																					36.5	36	39.63
0.0001																					54.75	56.13	57.01
1e-05																					80	85.76	84.26
1e-06																					302	309.15	302.79
1e-07																					630.88	668.92	629.83
1e-08																					740.13	745.68	749.23
1e-09																					755.01	781.68	787.36
1e-10																					758.88	769.56	771.23
duplicate
Total																					726.01	762.68	756.48
Non-spec																					42.75	42.5	41.63
0.0001																					49.38	49.13	46.88
1e-05																					91.38	89.51	86.76
1e-06																					307.63	313.65	307.54
1e-07																					637.88	639.55	638.34
1e-08																					730.14	762.94	750.86
1e-09																					757.26	761.06	761.99
1e-10																					762.51	773.44	773.61
