# Supplementary material for: Pharmacological Investigations of the Dissociative ‘Legal Highs’ Diphenidine, Methoxphenidine and Analogues
Source: PLoS One. 2016 Jun 17;11(6):e0157021. doi: 10.1371/journal.pone.0157021 (PMC4912077; doi:10.1371/journal.pone.0157021)
Supplement: S5 File — (XLSX) [file pone.0157021.s018.xlsx]

## Sheet: s768bcmb
Session	Date	Time	Subject	Grp	Trial Type	Trial #	Box	Startle
ISONEW	2015-05-07	14:49:17	25	2	P120	1	1	483
ISONEW	2015-05-07	14:49:17	2	1	P120	1	2	1351
ISONEW	2015-05-07	14:49:17	27	3	P120	1	3	593
ISONEW	2015-05-07	14:49:17	28	4	P120	1	4	2190
ISONEW	2015-05-07	14:49:17	29	4	P120	1	5	704
ISONEW	2015-05-07	14:49:17	14	5	P120	1	6	765
ISONEW	2015-05-07	14:49:17	31	2	P120	1	7	927
ISONEW	2015-05-07	14:49:17	33	1	P120	1	8	321
ISONEW	2015-05-07	14:49:17	25	2	NOSTIM	2	1	0
ISONEW	2015-05-07	14:49:17	2	1	NOSTIM	2	2	0
ISONEW	2015-05-07	14:49:17	27	3	NOSTIM	2	3	0
ISONEW	2015-05-07	14:49:17	28	4	NOSTIM	2	4	0
ISONEW	2015-05-07	14:49:17	29	4	NOSTIM	2	5	0
ISONEW	2015-05-07	14:49:17	14	5	NOSTIM	2	6	3
ISONEW	2015-05-07	14:49:17	31	2	NOSTIM	2	7	0
ISONEW	2015-05-07	14:49:17	33	1	NOSTIM	2	8	0
ISONEW	2015-05-07	14:49:17	25	2	P120	3	1	1504
ISONEW	2015-05-07	14:49:17	2	1	P120	3	2	1354
ISONEW	2015-05-07	14:49:17	27	3	P120	3	3	215
ISONEW	2015-05-07	14:49:17	28	4	P120	3	4	1822
ISONEW	2015-05-07	14:49:17	29	4	P120	3	5	2102
ISONEW	2015-05-07	14:49:17	14	5	P120	3	6	309
ISONEW	2015-05-07	14:49:17	31	2	P120	3	7	1601
ISONEW	2015-05-07	14:49:17	33	1	P120	3	8	493
ISONEW	2015-05-07	14:49:17	25	2	NOSTIM	4	1	2
ISONEW	2015-05-07	14:49:17	2	1	NOSTIM	4	2	0
ISONEW	2015-05-07	14:49:17	27	3	NOSTIM	4	3	0
ISONEW	2015-05-07	14:49:17	28	4	NOSTIM	4	4	0
ISONEW	2015-05-07	14:49:17	29	4	NOSTIM	4	5	0
ISONEW	2015-05-07	14:49:17	14	5	NOSTIM	4	6	0
ISONEW	2015-05-07	14:49:17	31	2	NOSTIM	4	7	0
ISONEW	2015-05-07	14:49:17	33	1	NOSTIM	4	8	0
ISONEW	2015-05-07	14:49:17	25	2	P120	5	1	332
ISONEW	2015-05-07	14:49:17	2	1	P120	5	2	505
ISONEW	2015-05-07	14:49:17	27	3	P120	5	3	484
ISONEW	2015-05-07	14:49:17	28	4	P120	5	4	1959
ISONEW	2015-05-07	14:49:17	29	4	P120	5	5	772
ISONEW	2015-05-07	14:49:17	14	5	P120	5	6	305
ISONEW	2015-05-07	14:49:17	31	2	P120	5	7	1266
ISONEW	2015-05-07	14:49:17	33	1	P120	5	8	120
ISONEW	2015-05-07	14:49:17	25	2	NOSTIM	6	1	0
ISONEW	2015-05-07	14:49:17	2	1	NOSTIM	6	2	0
ISONEW	2015-05-07	14:49:17	27	3	NOSTIM	6	3	0
ISONEW	2015-05-07	14:49:17	28	4	NOSTIM	6	4	0
ISONEW	2015-05-07	14:49:17	29	4	NOSTIM	6	5	0
ISONEW	2015-05-07	14:49:17	14	5	NOSTIM	6	6	0
ISONEW	2015-05-07	14:49:17	31	2	NOSTIM	6	7	0
ISONEW	2015-05-07	14:49:17	33	1	NOSTIM	6	8	0
ISONEW	2015-05-07	14:49:17	25	2	P120	7	1	278
ISONEW	2015-05-07	14:49:17	2	1	P120	7	2	1281
ISONEW	2015-05-07	14:49:17	27	3	P120	7	3	270
ISONEW	2015-05-07	14:49:17	28	4	P120	7	4	1188
ISONEW	2015-05-07	14:49:17	29	4	P120	7	5	1939
ISONEW	2015-05-07	14:49:17	14	5	P120	7	6	250
ISONEW	2015-05-07	14:49:17	31	2	P120	7	7	925
ISONEW	2015-05-07	14:49:17	33	1	P120	7	8	273
ISONEW	2015-05-07	14:49:17	25	2	NOSTIM	8	1	0
ISONEW	2015-05-07	14:49:17	2	1	NOSTIM	8	2	0
ISONEW	2015-05-07	14:49:17	27	3	NOSTIM	8	3	0
ISONEW	2015-05-07	14:49:17	28	4	NOSTIM	8	4	0
ISONEW	2015-05-07	14:49:17	29	4	NOSTIM	8	5	0
ISONEW	2015-05-07	14:49:17	14	5	NOSTIM	8	6	0
ISONEW	2015-05-07	14:49:17	31	2	NOSTIM	8	7	0
ISONEW	2015-05-07	14:49:17	33	1	NOSTIM	8	8	0
ISONEW	2015-05-07	14:49:17	25	2	P120	9	1	870
ISONEW	2015-05-07	14:49:17	2	1	P120	9	2	335
ISONEW	2015-05-07	14:49:17	27	3	P120	9	3	225
ISONEW	2015-05-07	14:49:17	28	4	P120	9	4	370
ISONEW	2015-05-07	14:49:17	29	4	P120	9	5	239
ISONEW	2015-05-07	14:49:17	14	5	P120	9	6	129
ISONEW	2015-05-07	14:49:17	31	2	P120	9	7	1136
ISONEW	2015-05-07	14:49:17	33	1	P120	9	8	79
ISONEW	2015-05-07	14:49:17	25	2	NOSTIM	10	1	0
ISONEW	2015-05-07	14:49:17	2	1	NOSTIM	10	2	0
ISONEW	2015-05-07	14:49:17	27	3	NOSTIM	10	3	0
ISONEW	2015-05-07	14:49:17	28	4	NOSTIM	10	4	0
ISONEW	2015-05-07	14:49:17	29	4	NOSTIM	10	5	0
ISONEW	2015-05-07	14:49:17	14	5	NOSTIM	10	6	0
ISONEW	2015-05-07	14:49:17	31	2	NOSTIM	10	7	0
ISONEW	2015-05-07	14:49:17	33	1	NOSTIM	10	8	0
ISONEW	2015-05-07	14:49:17	25	2	P120	11	1	1022
ISONEW	2015-05-07	14:49:17	2	1	P120	11	2	572
ISONEW	2015-05-07	14:49:17	27	3	P120	11	3	112
ISONEW	2015-05-07	14:49:17	28	4	P120	11	4	368
ISONEW	2015-05-07	14:49:17	29	4	P120	11	5	677
ISONEW	2015-05-07	14:49:17	14	5	P120	11	6	224
ISONEW	2015-05-07	14:49:17	31	2	P120	11	7	1122
ISONEW	2015-05-07	14:49:17	33	1	P120	11	8	138
ISONEW	2015-05-07	14:49:17	25	2	NOSTIM	12	1	0
ISONEW	2015-05-07	14:49:17	2	1	NOSTIM	12	2	0
ISONEW	2015-05-07	14:49:17	27	3	NOSTIM	12	3	0
ISONEW	2015-05-07	14:49:17	28	4	NOSTIM	12	4	0
ISONEW	2015-05-07	14:49:17	29	4	NOSTIM	12	5	0
ISONEW	2015-05-07	14:49:17	14	5	NOSTIM	12	6	0
ISONEW	2015-05-07	14:49:17	31	2	NOSTIM	12	7	0
ISONEW	2015-05-07	14:49:17	33	1	NOSTIM	12	8	0
ISONEW	2015-05-07	14:49:17	25	2	PP6P120	13	1	91
ISONEW	2015-05-07	14:49:17	2	1	PP6P120	13	2	330
ISONEW	2015-05-07	14:49:17	27	3	PP6P120	13	3	89
ISONEW	2015-05-07	14:49:17	28	4	PP6P120	13	4	273
ISONEW	2015-05-07	14:49:17	29	4	PP6P120	13	5	1764
ISONEW	2015-05-07	14:49:17	14	5	PP6P120	13	6	179
ISONEW	2015-05-07	14:49:17	31	2	PP6P120	13	7	291
ISONEW	2015-05-07	14:49:17	33	1	PP6P120	13	8	57
ISONEW	2015-05-07	14:49:17	25	2	NOSTIM	14	1	0
ISONEW	2015-05-07	14:49:17	2	1	NOSTIM	14	2	0
ISONEW	2015-05-07	14:49:17	27	3	NOSTIM	14	3	0
ISONEW	2015-05-07	14:49:17	28	4	NOSTIM	14	4	0
ISONEW	2015-05-07	14:49:17	29	4	NOSTIM	14	5	0
ISONEW	2015-05-07	14:49:17	14	5	NOSTIM	14	6	0
ISONEW	2015-05-07	14:49:17	31	2	NOSTIM	14	7	0
ISONEW	2015-05-07	14:49:17	33	1	NOSTIM	14	8	0
ISONEW	2015-05-07	14:49:17	25	2	PP12P120	15	1	61
ISONEW	2015-05-07	14:49:17	2	1	PP12P120	15	2	69
ISONEW	2015-05-07	14:49:17	27	3	PP12P120	15	3	30
ISONEW	2015-05-07	14:49:17	28	4	PP12P120	15	4	39
ISONEW	2015-05-07	14:49:17	29	4	PP12P120	15	5	95
ISONEW	2015-05-07	14:49:17	14	5	PP12P120	15	6	128
ISONEW	2015-05-07	14:49:17	31	2	PP12P120	15	7	196
ISONEW	2015-05-07	14:49:17	33	1	PP12P120	15	8	40
ISONEW	2015-05-07	14:49:17	25	2	NOSTIM	16	1	0
ISONEW	2015-05-07	14:49:17	2	1	NOSTIM	16	2	0
ISONEW	2015-05-07	14:49:17	27	3	NOSTIM	16	3	0
ISONEW	2015-05-07	14:49:17	28	4	NOSTIM	16	4	0
ISONEW	2015-05-07	14:49:17	29	4	NOSTIM	16	5	0
ISONEW	2015-05-07	14:49:17	14	5	NOSTIM	16	6	3
ISONEW	2015-05-07	14:49:17	31	2	NOSTIM	16	7	0
ISONEW	2015-05-07	14:49:17	33	1	NOSTIM	16	8	0
ISONEW	2015-05-07	14:49:17	25	2	PP3P120	17	1	358
ISONEW	2015-05-07	14:49:17	2	1	PP3P120	17	2	213
ISONEW	2015-05-07	14:49:17	27	3	PP3P120	17	3	71
ISONEW	2015-05-07	14:49:17	28	4	PP3P120	17	4	274
ISONEW	2015-05-07	14:49:17	29	4	PP3P120	17	5	171
ISONEW	2015-05-07	14:49:17	14	5	PP3P120	17	6	336
ISONEW	2015-05-07	14:49:17	31	2	PP3P120	17	7	362
ISONEW	2015-05-07	14:49:17	33	1	PP3P120	17	8	51
ISONEW	2015-05-07	14:49:17	25	2	NOSTIM	18	1	0
ISONEW	2015-05-07	14:49:17	2	1	NOSTIM	18	2	0
ISONEW	2015-05-07	14:49:17	27	3	NOSTIM	18	3	0
ISONEW	2015-05-07	14:49:17	28	4	NOSTIM	18	4	0
ISONEW	2015-05-07	14:49:17	29	4	NOSTIM	18	5	1
ISONEW	2015-05-07	14:49:17	14	5	NOSTIM	18	6	0
ISONEW	2015-05-07	14:49:17	31	2	NOSTIM	18	7	0
ISONEW	2015-05-07	14:49:17	33	1	NOSTIM	18	8	7
ISONEW	2015-05-07	14:49:17	25	2	P120	19	1	515
ISONEW	2015-05-07	14:49:17	2	1	P120	19	2	180
ISONEW	2015-05-07	14:49:17	27	3	P120	19	3	218
ISONEW	2015-05-07	14:49:17	28	4	P120	19	4	328
ISONEW	2015-05-07	14:49:17	29	4	P120	19	5	263
ISONEW	2015-05-07	14:49:17	14	5	P120	19	6	318
ISONEW	2015-05-07	14:49:17	31	2	P120	19	7	751
ISONEW	2015-05-07	14:49:17	33	1	P120	19	8	42
ISONEW	2015-05-07	14:49:17	25	2	NOSTIM	20	1	0
ISONEW	2015-05-07	14:49:17	2	1	NOSTIM	20	2	0
ISONEW	2015-05-07	14:49:17	27	3	NOSTIM	20	3	0
ISONEW	2015-05-07	14:49:17	28	4	NOSTIM	20	4	0
ISONEW	2015-05-07	14:49:17	29	4	NOSTIM	20	5	0
ISONEW	2015-05-07	14:49:17	14	5	NOSTIM	20	6	0
ISONEW	2015-05-07	14:49:17	31	2	NOSTIM	20	7	0
ISONEW	2015-05-07	14:49:17	33	1	NOSTIM	20	8	8
ISONEW	2015-05-07	14:49:17	25	2	PP6P120	21	1	41
ISONEW	2015-05-07	14:49:17	2	1	PP6P120	21	2	142
ISONEW	2015-05-07	14:49:17	27	3	PP6P120	21	3	68
ISONEW	2015-05-07	14:49:17	28	4	PP6P120	21	4	103
ISONEW	2015-05-07	14:49:17	29	4	PP6P120	21	5	27
ISONEW	2015-05-07	14:49:17	14	5	PP6P120	21	6	298
ISONEW	2015-05-07	14:49:17	31	2	PP6P120	21	7	281
ISONEW	2015-05-07	14:49:17	33	1	PP6P120	21	8	69
ISONEW	2015-05-07	14:49:17	25	2	NOSTIM	22	1	0
ISONEW	2015-05-07	14:49:17	2	1	NOSTIM	22	2	0
ISONEW	2015-05-07	14:49:17	27	3	NOSTIM	22	3	0
ISONEW	2015-05-07	14:49:17	28	4	NOSTIM	22	4	0
ISONEW	2015-05-07	14:49:17	29	4	NOSTIM	22	5	0
ISONEW	2015-05-07	14:49:17	14	5	NOSTIM	22	6	0
ISONEW	2015-05-07	14:49:17	31	2	NOSTIM	22	7	0
ISONEW	2015-05-07	14:49:17	33	1	NOSTIM	22	8	0
ISONEW	2015-05-07	14:49:17	25	2	PP3P120	23	1	90
ISONEW	2015-05-07	14:49:17	2	1	PP3P120	23	2	102
ISONEW	2015-05-07	14:49:17	27	3	PP3P120	23	3	119
ISONEW	2015-05-07	14:49:17	28	4	PP3P120	23	4	1007
ISONEW	2015-05-07	14:49:17	29	4	PP3P120	23	5	511
ISONEW	2015-05-07	14:49:17	14	5	PP3P120	23	6	286
ISONEW	2015-05-07	14:49:17	31	2	PP3P120	23	7	362
ISONEW	2015-05-07	14:49:17	33	1	PP3P120	23	8	54
ISONEW	2015-05-07	14:49:17	25	2	NOSTIM	24	1	0
ISONEW	2015-05-07	14:49:17	2	1	NOSTIM	24	2	0
ISONEW	2015-05-07	14:49:17	27	3	NOSTIM	24	3	0
ISONEW	2015-05-07	14:49:17	28	4	NOSTIM	24	4	0
ISONEW	2015-05-07	14:49:17	29	4	NOSTIM	24	5	0
ISONEW	2015-05-07	14:49:17	14	5	NOSTIM	24	6	0
ISONEW	2015-05-07	14:49:17	31	2	NOSTIM	24	7	0
ISONEW	2015-05-07	14:49:17	33	1	NOSTIM	24	8	0
ISONEW	2015-05-07	14:49:17	25	2	PP6P120	25	1	26
ISONEW	2015-05-07	14:49:17	2	1	PP6P120	25	2	52
ISONEW	2015-05-07	14:49:17	27	3	PP6P120	25	3	23
ISONEW	2015-05-07	14:49:17	28	4	PP6P120	25	4	59
ISONEW	2015-05-07	14:49:17	29	4	PP6P120	25	5	17
ISONEW	2015-05-07	14:49:17	14	5	PP6P120	25	6	206
ISONEW	2015-05-07	14:49:17	31	2	PP6P120	25	7	235
ISONEW	2015-05-07	14:49:17	33	1	PP6P120	25	8	20
ISONEW	2015-05-07	14:49:17	25	2	NOSTIM	26	1	0
ISONEW	2015-05-07	14:49:17	2	1	NOSTIM	26	2	0
ISONEW	2015-05-07	14:49:17	27	3	NOSTIM	26	3	0
ISONEW	2015-05-07	14:49:17	28	4	NOSTIM	26	4	0
ISONEW	2015-05-07	14:49:17	29	4	NOSTIM	26	5	0
ISONEW	2015-05-07	14:49:17	14	5	NOSTIM	26	6	1
ISONEW	2015-05-07	14:49:17	31	2	NOSTIM	26	7	0
ISONEW	2015-05-07	14:49:17	33	1	NOSTIM	26	8	0
ISONEW	2015-05-07	14:49:17	25	2	P120	27	1	96
ISONEW	2015-05-07	14:49:17	2	1	P120	27	2	120
ISONEW	2015-05-07	14:49:17	27	3	P120	27	3	310
ISONEW	2015-05-07	14:49:17	28	4	P120	27	4	959
ISONEW	2015-05-07	14:49:17	29	4	P120	27	5	71
ISONEW	2015-05-07	14:49:17	14	5	P120	27	6	183
ISONEW	2015-05-07	14:49:17	31	2	P120	27	7	468
ISONEW	2015-05-07	14:49:17	33	1	P120	27	8	67
ISONEW	2015-05-07	14:49:17	25	2	NOSTIM	28	1	0
ISONEW	2015-05-07	14:49:17	2	1	NOSTIM	28	2	0
ISONEW	2015-05-07	14:49:17	27	3	NOSTIM	28	3	0
ISONEW	2015-05-07	14:49:17	28	4	NOSTIM	28	4	0
ISONEW	2015-05-07	14:49:17	29	4	NOSTIM	28	5	0
ISONEW	2015-05-07	14:49:17	14	5	NOSTIM	28	6	0
ISONEW	2015-05-07	14:49:17	31	2	NOSTIM	28	7	0
ISONEW	2015-05-07	14:49:17	33	1	NOSTIM	28	8	0
ISONEW	2015-05-07	14:49:17	25	2	PP12P120	29	1	35
ISONEW	2015-05-07	14:49:17	2	1	PP12P120	29	2	67
ISONEW	2015-05-07	14:49:17	27	3	PP12P120	29	3	23
ISONEW	2015-05-07	14:49:17	28	4	PP12P120	29	4	52
ISONEW	2015-05-07	14:49:17	29	4	PP12P120	29	5	96
ISONEW	2015-05-07	14:49:17	14	5	PP12P120	29	6	82
ISONEW	2015-05-07	14:49:17	31	2	PP12P120	29	7	151
ISONEW	2015-05-07	14:49:17	33	1	PP12P120	29	8	40
ISONEW	2015-05-07	14:49:17	25	2	NOSTIM	30	1	0
ISONEW	2015-05-07	14:49:17	2	1	NOSTIM	30	2	0
ISONEW	2015-05-07	14:49:17	27	3	NOSTIM	30	3	0
ISONEW	2015-05-07	14:49:17	28	4	NOSTIM	30	4	4
ISONEW	2015-05-07	14:49:17	29	4	NOSTIM	30	5	0
ISONEW	2015-05-07	14:49:17	14	5	NOSTIM	30	6	0
ISONEW	2015-05-07	14:49:17	31	2	NOSTIM	30	7	0
ISONEW	2015-05-07	14:49:17	33	1	NOSTIM	30	8	0
ISONEW	2015-05-07	14:49:17	25	2	P120	31	1	73
ISONEW	2015-05-07	14:49:17	2	1	P120	31	2	276
ISONEW	2015-05-07	14:49:17	27	3	P120	31	3	176
ISONEW	2015-05-07	14:49:17	28	4	P120	31	4	96
ISONEW	2015-05-07	14:49:17	29	4	P120	31	5	324
ISONEW	2015-05-07	14:49:17	14	5	P120	31	6	95
ISONEW	2015-05-07	14:49:17	31	2	P120	31	7	490
ISONEW	2015-05-07	14:49:17	33	1	P120	31	8	74
ISONEW	2015-05-07	14:49:17	25	2	NOSTIM	32	1	0
ISONEW	2015-05-07	14:49:17	2	1	NOSTIM	32	2	0
ISONEW	2015-05-07	14:49:17	27	3	NOSTIM	32	3	0
ISONEW	2015-05-07	14:49:17	28	4	NOSTIM	32	4	0
ISONEW	2015-05-07	14:49:17	29	4	NOSTIM	32	5	0
ISONEW	2015-05-07	14:49:17	14	5	NOSTIM	32	6	0
ISONEW	2015-05-07	14:49:17	31	2	NOSTIM	32	7	5
ISONEW	2015-05-07	14:49:17	33	1	NOSTIM	32	8	3
ISONEW	2015-05-07	14:49:17	25	2	PP3P120	33	1	48
ISONEW	2015-05-07	14:49:17	2	1	PP3P120	33	2	70
ISONEW	2015-05-07	14:49:17	27	3	PP3P120	33	3	183
ISONEW	2015-05-07	14:49:17	28	4	PP3P120	33	4	74
ISONEW	2015-05-07	14:49:17	29	4	PP3P120	33	5	116
ISONEW	2015-05-07	14:49:17	14	5	PP3P120	33	6	51
ISONEW	2015-05-07	14:49:17	31	2	PP3P120	33	7	132
ISONEW	2015-05-07	14:49:17	33	1	PP3P120	33	8	33
ISONEW	2015-05-07	14:49:17	25	2	NOSTIM	34	1	0
ISONEW	2015-05-07	14:49:17	2	1	NOSTIM	34	2	0
ISONEW	2015-05-07	14:49:17	27	3	NOSTIM	34	3	0
ISONEW	2015-05-07	14:49:17	28	4	NOSTIM	34	4	0
ISONEW	2015-05-07	14:49:17	29	4	NOSTIM	34	5	0
ISONEW	2015-05-07	14:49:17	14	5	NOSTIM	34	6	0
ISONEW	2015-05-07	14:49:17	31	2	NOSTIM	34	7	0
ISONEW	2015-05-07	14:49:17	33	1	NOSTIM	34	8	3
ISONEW	2015-05-07	14:49:17	25	2	PP12P120	35	1	21
ISONEW	2015-05-07	14:49:17	2	1	PP12P120	35	2	106
ISONEW	2015-05-07	14:49:17	27	3	PP12P120	35	3	80
ISONEW	2015-05-07	14:49:17	28	4	PP12P120	35	4	71
ISONEW	2015-05-07	14:49:17	29	4	PP12P120	35	5	58
ISONEW	2015-05-07	14:49:17	14	5	PP12P120	35	6	137
ISONEW	2015-05-07	14:49:17	31	2	PP12P120	35	7	234
ISONEW	2015-05-07	14:49:17	33	1	PP12P120	35	8	23
ISONEW	2015-05-07	14:49:17	25	2	NOSTIM	36	1	0
ISONEW	2015-05-07	14:49:17	2	1	NOSTIM	36	2	0
ISONEW	2015-05-07	14:49:17	27	3	NOSTIM	36	3	0
ISONEW	2015-05-07	14:49:17	28	4	NOSTIM	36	4	0
ISONEW	2015-05-07	14:49:17	29	4	NOSTIM	36	5	0
ISONEW	2015-05-07	14:49:17	14	5	NOSTIM	36	6	0
ISONEW	2015-05-07	14:49:17	31	2	NOSTIM	36	7	0
ISONEW	2015-05-07	14:49:17	33	1	NOSTIM	36	8	0
ISONEW	2015-05-07	14:49:17	25	2	PP3P120	37	1	61
ISONEW	2015-05-07	14:49:17	2	1	PP3P120	37	2	127
ISONEW	2015-05-07	14:49:17	27	3	PP3P120	37	3	28
ISONEW	2015-05-07	14:49:17	28	4	PP3P120	37	4	166
ISONEW	2015-05-07	14:49:17	29	4	PP3P120	37	5	583
ISONEW	2015-05-07	14:49:17	14	5	PP3P120	37	6	110
ISONEW	2015-05-07	14:49:17	31	2	PP3P120	37	7	208
ISONEW	2015-05-07	14:49:17	33	1	PP3P120	37	8	56
ISONEW	2015-05-07	14:49:17	25	2	NOSTIM	38	1	0
ISONEW	2015-05-07	14:49:17	2	1	NOSTIM	38	2	0
ISONEW	2015-05-07	14:49:17	27	3	NOSTIM	38	3	0
ISONEW	2015-05-07	14:49:17	28	4	NOSTIM	38	4	0
ISONEW	2015-05-07	14:49:17	29	4	NOSTIM	38	5	0
ISONEW	2015-05-07	14:49:17	14	5	NOSTIM	38	6	0
ISONEW	2015-05-07	14:49:17	31	2	NOSTIM	38	7	0
ISONEW	2015-05-07	14:49:17	33	1	NOSTIM	38	8	0
ISONEW	2015-05-07	14:49:17	25	2	PP12P120	39	1	43
ISONEW	2015-05-07	14:49:17	2	1	PP12P120	39	2	130
ISONEW	2015-05-07	14:49:17	27	3	PP12P120	39	3	20
ISONEW	2015-05-07	14:49:17	28	4	PP12P120	39	4	16
ISONEW	2015-05-07	14:49:17	29	4	PP12P120	39	5	38
ISONEW	2015-05-07	14:49:17	14	5	PP12P120	39	6	17
ISONEW	2015-05-07	14:49:17	31	2	PP12P120	39	7	258
ISONEW	2015-05-07	14:49:17	33	1	PP12P120	39	8	26
ISONEW	2015-05-07	14:49:17	25	2	NOSTIM	40	1	0
ISONEW	2015-05-07	14:49:17	2	1	NOSTIM	40	2	0
ISONEW	2015-05-07	14:49:17	27	3	NOSTIM	40	3	0
ISONEW	2015-05-07	14:49:17	28	4	NOSTIM	40	4	0
ISONEW	2015-05-07	14:49:17	29	4	NOSTIM	40	5	5
ISONEW	2015-05-07	14:49:17	14	5	NOSTIM	40	6	29
ISONEW	2015-05-07	14:49:17	31	2	NOSTIM	40	7	0
ISONEW	2015-05-07	14:49:17	33	1	NOSTIM	40	8	0
ISONEW	2015-05-07	14:49:17	25	2	PP6P120	41	1	34
ISONEW	2015-05-07	14:49:17	2	1	PP6P120	41	2	122
ISONEW	2015-05-07	14:49:17	27	3	PP6P120	41	3	67
ISONEW	2015-05-07	14:49:17	28	4	PP6P120	41	4	473
ISONEW	2015-05-07	14:49:17	29	4	PP6P120	41	5	76
ISONEW	2015-05-07	14:49:17	14	5	PP6P120	41	6	85
ISONEW	2015-05-07	14:49:17	31	2	PP6P120	41	7	299
ISONEW	2015-05-07	14:49:17	33	1	PP6P120	41	8	22
ISONEW	2015-05-07	14:49:17	25	2	NOSTIM	42	1	0
ISONEW	2015-05-07	14:49:17	2	1	NOSTIM	42	2	0
ISONEW	2015-05-07	14:49:17	27	3	NOSTIM	42	3	0
ISONEW	2015-05-07	14:49:17	28	4	NOSTIM	42	4	0
ISONEW	2015-05-07	14:49:17	29	4	NOSTIM	42	5	0
ISONEW	2015-05-07	14:49:17	14	5	NOSTIM	42	6	2
ISONEW	2015-05-07	14:49:17	31	2	NOSTIM	42	7	3
ISONEW	2015-05-07	14:49:17	33	1	NOSTIM	42	8	0
ISONEW	2015-05-07	14:49:17	25	2	P120	43	1	262
ISONEW	2015-05-07	14:49:17	2	1	P120	43	2	182
ISONEW	2015-05-07	14:49:17	27	3	P120	43	3	94
ISONEW	2015-05-07	14:49:17	28	4	P120	43	4	86
ISONEW	2015-05-07	14:49:17	29	4	P120	43	5	653
ISONEW	2015-05-07	14:49:17	14	5	P120	43	6	288
ISONEW	2015-05-07	14:49:17	31	2	P120	43	7	381
ISONEW	2015-05-07	14:49:17	33	1	P120	43	8	61
ISONEW	2015-05-07	14:49:17	25	2	NOSTIM	44	1	0
ISONEW	2015-05-07	14:49:17	2	1	NOSTIM	44	2	0
ISONEW	2015-05-07	14:49:17	27	3	NOSTIM	44	3	0
ISONEW	2015-05-07	14:49:17	28	4	NOSTIM	44	4	0
ISONEW	2015-05-07	14:49:17	29	4	NOSTIM	44	5	12
ISONEW	2015-05-07	14:49:17	14	5	NOSTIM	44	6	46
ISONEW	2015-05-07	14:49:17	31	2	NOSTIM	44	7	0
ISONEW	2015-05-07	14:49:17	33	1	NOSTIM	44	8	0
ISONEW	2015-05-07	14:49:17	25	2	PP3P120	45	1	18
ISONEW	2015-05-07	14:49:17	2	1	PP3P120	45	2	127
ISONEW	2015-05-07	14:49:17	27	3	PP3P120	45	3	38
ISONEW	2015-05-07	14:49:17	28	4	PP3P120	45	4	40
ISONEW	2015-05-07	14:49:17	29	4	PP3P120	45	5	266
ISONEW	2015-05-07	14:49:17	14	5	PP3P120	45	6	278
ISONEW	2015-05-07	14:49:17	31	2	PP3P120	45	7	188
ISONEW	2015-05-07	14:49:17	33	1	PP3P120	45	8	22
ISONEW	2015-05-07	14:49:17	25	2	NOSTIM	46	1	0
ISONEW	2015-05-07	14:49:17	2	1	NOSTIM	46	2	0
ISONEW	2015-05-07	14:49:17	27	3	NOSTIM	46	3	0
ISONEW	2015-05-07	14:49:17	28	4	NOSTIM	46	4	0
ISONEW	2015-05-07	14:49:17	29	4	NOSTIM	46	5	0
ISONEW	2015-05-07	14:49:17	14	5	NOSTIM	46	6	0
ISONEW	2015-05-07	14:49:17	31	2	NOSTIM	46	7	0
ISONEW	2015-05-07	14:49:17	33	1	NOSTIM	46	8	0
ISONEW	2015-05-07	14:49:17	25	2	PP12P120	47	1	38
ISONEW	2015-05-07	14:49:17	2	1	PP12P120	47	2	100
ISONEW	2015-05-07	14:49:17	27	3	PP12P120	47	3	34
ISONEW	2015-05-07	14:49:17	28	4	PP12P120	47	4	20
ISONEW	2015-05-07	14:49:17	29	4	PP12P120	47	5	34
ISONEW	2015-05-07	14:49:17	14	5	PP12P120	47	6	45
ISONEW	2015-05-07	14:49:17	31	2	PP12P120	47	7	103
ISONEW	2015-05-07	14:49:17	33	1	PP12P120	47	8	3
ISONEW	2015-05-07	14:49:17	25	2	NOSTIM	48	1	0
ISONEW	2015-05-07	14:49:17	2	1	NOSTIM	48	2	0
ISONEW	2015-05-07	14:49:17	27	3	NOSTIM	48	3	0
ISONEW	2015-05-07	14:49:17	28	4	NOSTIM	48	4	0
ISONEW	2015-05-07	14:49:17	29	4	NOSTIM	48	5	1
ISONEW	2015-05-07	14:49:17	14	5	NOSTIM	48	6	28
ISONEW	2015-05-07	14:49:17	31	2	NOSTIM	48	7	0
ISONEW	2015-05-07	14:49:17	33	1	NOSTIM	48	8	3
ISONEW	2015-05-07	14:49:17	25	2	PP6P120	49	1	93
ISONEW	2015-05-07	14:49:17	2	1	PP6P120	49	2	103
ISONEW	2015-05-07	14:49:17	27	3	PP6P120	49	3	53
ISONEW	2015-05-07	14:49:17	28	4	PP6P120	49	4	41
ISONEW	2015-05-07	14:49:17	29	4	PP6P120	49	5	157
ISONEW	2015-05-07	14:49:17	14	5	PP6P120	49	6	28
ISONEW	2015-05-07	14:49:17	31	2	PP6P120	49	7	338
ISONEW	2015-05-07	14:49:17	33	1	PP6P120	49	8	75
ISONEW	2015-05-07	14:49:17	25	2	NOSTIM	50	1	0
ISONEW	2015-05-07	14:49:17	2	1	NOSTIM	50	2	0
ISONEW	2015-05-07	14:49:17	27	3	NOSTIM	50	3	0
ISONEW	2015-05-07	14:49:17	28	4	NOSTIM	50	4	0
ISONEW	2015-05-07	14:49:17	29	4	NOSTIM	50	5	0
ISONEW	2015-05-07	14:49:17	14	5	NOSTIM	50	6	0
ISONEW	2015-05-07	14:49:17	31	2	NOSTIM	50	7	0
ISONEW	2015-05-07	14:49:17	33	1	NOSTIM	50	8	0
ISONEW	2015-05-07	14:49:17	25	2	P120	51	1	53
ISONEW	2015-05-07	14:49:17	2	1	P120	51	2	246
ISONEW	2015-05-07	14:49:17	27	3	P120	51	3	240
ISONEW	2015-05-07	14:49:17	28	4	P120	51	4	371
ISONEW	2015-05-07	14:49:17	29	4	P120	51	5	321
ISONEW	2015-05-07	14:49:17	14	5	P120	51	6	124
ISONEW	2015-05-07	14:49:17	31	2	P120	51	7	353
ISONEW	2015-05-07	14:49:17	33	1	P120	51	8	208
ISONEW	2015-05-07	14:49:17	25	2	NOSTIM	52	1	0
ISONEW	2015-05-07	14:49:17	2	1	NOSTIM	52	2	0
ISONEW	2015-05-07	14:49:17	27	3	NOSTIM	52	3	0
ISONEW	2015-05-07	14:49:17	28	4	NOSTIM	52	4	0
ISONEW	2015-05-07	14:49:17	29	4	NOSTIM	52	5	12
ISONEW	2015-05-07	14:49:17	14	5	NOSTIM	52	6	0
ISONEW	2015-05-07	14:49:17	31	2	NOSTIM	52	7	0
ISONEW	2015-05-07	14:49:17	33	1	NOSTIM	52	8	0
ISONEW	2015-05-07	14:49:17	25	2	PP3P120	53	1	110
ISONEW	2015-05-07	14:49:17	2	1	PP3P120	53	2	77
ISONEW	2015-05-07	14:49:17	27	3	PP3P120	53	3	61
ISONEW	2015-05-07	14:49:17	28	4	PP3P120	53	4	89
ISONEW	2015-05-07	14:49:17	29	4	PP3P120	53	5	51
ISONEW	2015-05-07	14:49:17	14	5	PP3P120	53	6	425
ISONEW	2015-05-07	14:49:17	31	2	PP3P120	53	7	431
ISONEW	2015-05-07	14:49:17	33	1	PP3P120	53	8	61
ISONEW	2015-05-07	14:49:17	25	2	NOSTIM	54	1	0
ISONEW	2015-05-07	14:49:17	2	1	NOSTIM	54	2	0
ISONEW	2015-05-07	14:49:17	27	3	NOSTIM	54	3	0
ISONEW	2015-05-07	14:49:17	28	4	NOSTIM	54	4	0
ISONEW	2015-05-07	14:49:17	29	4	NOSTIM	54	5	14
ISONEW	2015-05-07	14:49:17	14	5	NOSTIM	54	6	0
ISONEW	2015-05-07	14:49:17	31	2	NOSTIM	54	7	0
ISONEW	2015-05-07	14:49:17	33	1	NOSTIM	54	8	0
ISONEW	2015-05-07	14:49:17	25	2	PP12P120	55	1	4
ISONEW	2015-05-07	14:49:17	2	1	PP12P120	55	2	39
ISONEW	2015-05-07	14:49:17	27	3	PP12P120	55	3	28
ISONEW	2015-05-07	14:49:17	28	4	PP12P120	55	4	37
ISONEW	2015-05-07	14:49:17	29	4	PP12P120	55	5	91
ISONEW	2015-05-07	14:49:17	14	5	PP12P120	55	6	334
ISONEW	2015-05-07	14:49:17	31	2	PP12P120	55	7	121
ISONEW	2015-05-07	14:49:17	33	1	PP12P120	55	8	14
ISONEW	2015-05-07	14:49:17	25	2	NOSTIM	56	1	0
ISONEW	2015-05-07	14:49:17	2	1	NOSTIM	56	2	0
ISONEW	2015-05-07	14:49:17	27	3	NOSTIM	56	3	0
ISONEW	2015-05-07	14:49:17	28	4	NOSTIM	56	4	0
ISONEW	2015-05-07	14:49:17	29	4	NOSTIM	56	5	1
ISONEW	2015-05-07	14:49:17	14	5	NOSTIM	56	6	2
ISONEW	2015-05-07	14:49:17	31	2	NOSTIM	56	7	0
ISONEW	2015-05-07	14:49:17	33	1	NOSTIM	56	8	0
ISONEW	2015-05-07	14:49:17	25	2	P120	57	1	80
ISONEW	2015-05-07	14:49:17	2	1	P120	57	2	115
ISONEW	2015-05-07	14:49:17	27	3	P120	57	3	82
ISONEW	2015-05-07	14:49:17	28	4	P120	57	4	279
ISONEW	2015-05-07	14:49:17	29	4	P120	57	5	124
ISONEW	2015-05-07	14:49:17	14	5	P120	57	6	198
ISONEW	2015-05-07	14:49:17	31	2	P120	57	7	394
ISONEW	2015-05-07	14:49:17	33	1	P120	57	8	98
ISONEW	2015-05-07	14:49:17	25	2	NOSTIM	58	1	0
ISONEW	2015-05-07	14:49:17	2	1	NOSTIM	58	2	0
ISONEW	2015-05-07	14:49:17	27	3	NOSTIM	58	3	0
ISONEW	2015-05-07	14:49:17	28	4	NOSTIM	58	4	0
ISONEW	2015-05-07	14:49:17	29	4	NOSTIM	58	5	4
ISONEW	2015-05-07	14:49:17	14	5	NOSTIM	58	6	0
ISONEW	2015-05-07	14:49:17	31	2	NOSTIM	58	7	0
ISONEW	2015-05-07	14:49:17	33	1	NOSTIM	58	8	0
ISONEW	2015-05-07	14:49:17	25	2	PP6P120	59	1	19
ISONEW	2015-05-07	14:49:17	2	1	PP6P120	59	2	65
ISONEW	2015-05-07	14:49:17	27	3	PP6P120	59	3	46
ISONEW	2015-05-07	14:49:17	28	4	PP6P120	59	4	48
ISONEW	2015-05-07	14:49:17	29	4	PP6P120	59	5	83
ISONEW	2015-05-07	14:49:17	14	5	PP6P120	59	6	181
ISONEW	2015-05-07	14:49:17	31	2	PP6P120	59	7	350
ISONEW	2015-05-07	14:49:17	33	1	PP6P120	59	8	23
ISONEW	2015-05-07	14:49:17	25	2	NOSTIM	60	1	0
ISONEW	2015-05-07	14:49:17	2	1	NOSTIM	60	2	0
ISONEW	2015-05-07	14:49:17	27	3	NOSTIM	60	3	0
ISONEW	2015-05-07	14:49:17	28	4	NOSTIM	60	4	0
ISONEW	2015-05-07	14:49:17	29	4	NOSTIM	60	5	1
ISONEW	2015-05-07	14:49:17	14	5	NOSTIM	60	6	0
ISONEW	2015-05-07	14:49:17	31	2	NOSTIM	60	7	0
ISONEW	2015-05-07	14:49:17	33	1	NOSTIM	60	8	0
ISONEW	2015-05-07	14:49:17	25	2	PP6P120	61	1	19
ISONEW	2015-05-07	14:49:17	2	1	PP6P120	61	2	97
ISONEW	2015-05-07	14:49:17	27	3	PP6P120	61	3	89
ISONEW	2015-05-07	14:49:17	28	4	PP6P120	61	4	71
ISONEW	2015-05-07	14:49:17	29	4	PP6P120	61	5	161
ISONEW	2015-05-07	14:49:17	14	5	PP6P120	61	6	29
ISONEW	2015-05-07	14:49:17	31	2	PP6P120	61	7	182
ISONEW	2015-05-07	14:49:17	33	1	PP6P120	61	8	12
ISONEW	2015-05-07	14:49:17	25	2	NOSTIM	62	1	0
ISONEW	2015-05-07	14:49:17	2	1	NOSTIM	62	2	0
ISONEW	2015-05-07	14:49:17	27	3	NOSTIM	62	3	0
ISONEW	2015-05-07	14:49:17	28	4	NOSTIM	62	4	0
ISONEW	2015-05-07	14:49:17	29	4	NOSTIM	62	5	0
ISONEW	2015-05-07	14:49:17	14	5	NOSTIM	62	6	0
ISONEW	2015-05-07	14:49:17	31	2	NOSTIM	62	7	0
ISONEW	2015-05-07	14:49:17	33	1	NOSTIM	62	8	0
ISONEW	2015-05-07	14:49:17	25	2	PP12P120	63	1	8
ISONEW	2015-05-07	14:49:17	2	1	PP12P120	63	2	33
ISONEW	2015-05-07	14:49:17	27	3	PP12P120	63	3	45
ISONEW	2015-05-07	14:49:17	28	4	PP12P120	63	4	41
ISONEW	2015-05-07	14:49:17	29	4	PP12P120	63	5	91
ISONEW	2015-05-07	14:49:17	14	5	PP12P120	63	6	44
ISONEW	2015-05-07	14:49:17	31	2	PP12P120	63	7	153
ISONEW	2015-05-07	14:49:17	33	1	PP12P120	63	8	10
ISONEW	2015-05-07	14:49:17	25	2	NOSTIM	64	1	0
ISONEW	2015-05-07	14:49:17	2	1	NOSTIM	64	2	0
ISONEW	2015-05-07	14:49:17	27	3	NOSTIM	64	3	0
ISONEW	2015-05-07	14:49:17	28	4	NOSTIM	64	4	0
ISONEW	2015-05-07	14:49:17	29	4	NOSTIM	64	5	0
ISONEW	2015-05-07	14:49:17	14	5	NOSTIM	64	6	0
ISONEW	2015-05-07	14:49:17	31	2	NOSTIM	64	7	0
ISONEW	2015-05-07	14:49:17	33	1	NOSTIM	64	8	0
ISONEW	2015-05-07	14:49:17	25	2	PP3P120	65	1	14
ISONEW	2015-05-07	14:49:17	2	1	PP3P120	65	2	138
ISONEW	2015-05-07	14:49:17	27	3	PP3P120	65	3	141
ISONEW	2015-05-07	14:49:17	28	4	PP3P120	65	4	120
ISONEW	2015-05-07	14:49:17	29	4	PP3P120	65	5	230
ISONEW	2015-05-07	14:49:17	14	5	PP3P120	65	6	84
ISONEW	2015-05-07	14:49:17	31	2	PP3P120	65	7	302
ISONEW	2015-05-07	14:49:17	33	1	PP3P120	65	8	15
ISONEW	2015-05-07	14:49:17	25	2	NOSTIM	66	1	0
ISONEW	2015-05-07	14:49:17	2	1	NOSTIM	66	2	0
ISONEW	2015-05-07	14:49:17	27	3	NOSTIM	66	3	0
ISONEW	2015-05-07	14:49:17	28	4	NOSTIM	66	4	0
ISONEW	2015-05-07	14:49:17	29	4	NOSTIM	66	5	1
ISONEW	2015-05-07	14:49:17	14	5	NOSTIM	66	6	1
ISONEW	2015-05-07	14:49:17	31	2	NOSTIM	66	7	0
ISONEW	2015-05-07	14:49:17	33	1	NOSTIM	66	8	1
ISONEW	2015-05-07	14:49:17	25	2	P120	67	1	80
ISONEW	2015-05-07	14:49:17	2	1	P120	67	2	178
ISONEW	2015-05-07	14:49:17	27	3	P120	67	3	185
ISONEW	2015-05-07	14:49:17	28	4	P120	67	4	443
ISONEW	2015-05-07	14:49:17	29	4	P120	67	5	207
ISONEW	2015-05-07	14:49:17	14	5	P120	67	6	189
ISONEW	2015-05-07	14:49:17	31	2	P120	67	7	601
ISONEW	2015-05-07	14:49:17	33	1	P120	67	8	367
ISONEW	2015-05-07	14:49:17	25	2	NOSTIM	68	1	0
ISONEW	2015-05-07	14:49:17	2	1	NOSTIM	68	2	0
ISONEW	2015-05-07	14:49:17	27	3	NOSTIM	68	3	0
ISONEW	2015-05-07	14:49:17	28	4	NOSTIM	68	4	0
ISONEW	2015-05-07	14:49:17	29	4	NOSTIM	68	5	0
ISONEW	2015-05-07	14:49:17	14	5	NOSTIM	68	6	8
ISONEW	2015-05-07	14:49:17	31	2	NOSTIM	68	7	0
ISONEW	2015-05-07	14:49:17	33	1	NOSTIM	68	8	2
ISONEW	2015-05-07	14:49:17	25	2	PP6P120	69	1	15
ISONEW	2015-05-07	14:49:17	2	1	PP6P120	69	2	123
ISONEW	2015-05-07	14:49:17	27	3	PP6P120	69	3	93
ISONEW	2015-05-07	14:49:17	28	4	PP6P120	69	4	105
ISONEW	2015-05-07	14:49:17	29	4	PP6P120	69	5	125
ISONEW	2015-05-07	14:49:17	14	5	PP6P120	69	6	32
ISONEW	2015-05-07	14:49:17	31	2	PP6P120	69	7	222
ISONEW	2015-05-07	14:49:17	33	1	PP6P120	69	8	56
ISONEW	2015-05-07	14:49:17	25	2	NOSTIM	70	1	0
ISONEW	2015-05-07	14:49:17	2	1	NOSTIM	70	2	0
ISONEW	2015-05-07	14:49:17	27	3	NOSTIM	70	3	0
ISONEW	2015-05-07	14:49:17	28	4	NOSTIM	70	4	0
ISONEW	2015-05-07	14:49:17	29	4	NOSTIM	70	5	0
ISONEW	2015-05-07	14:49:17	14	5	NOSTIM	70	6	0
ISONEW	2015-05-07	14:49:17	31	2	NOSTIM	70	7	0
ISONEW	2015-05-07	14:49:17	33	1	NOSTIM	70	8	0
ISONEW	2015-05-07	14:49:17	25	2	PP3P120	71	1	21
ISONEW	2015-05-07	14:49:17	2	1	PP3P120	71	2	107
ISONEW	2015-05-07	14:49:17	27	3	PP3P120	71	3	75
ISONEW	2015-05-07	14:49:17	28	4	PP3P120	71	4	69
ISONEW	2015-05-07	14:49:17	29	4	PP3P120	71	5	81
ISONEW	2015-05-07	14:49:17	14	5	PP3P120	71	6	56
ISONEW	2015-05-07	14:49:17	31	2	PP3P120	71	7	240
ISONEW	2015-05-07	14:49:17	33	1	PP3P120	71	8	57
ISONEW	2015-05-07	14:49:17	25	2	NOSTIM	72	1	0
ISONEW	2015-05-07	14:49:17	2	1	NOSTIM	72	2	0
ISONEW	2015-05-07	14:49:17	27	3	NOSTIM	72	3	0
ISONEW	2015-05-07	14:49:17	28	4	NOSTIM	72	4	0
ISONEW	2015-05-07	14:49:17	29	4	NOSTIM	72	5	0
ISONEW	2015-05-07	14:49:17	14	5	NOSTIM	72	6	0
ISONEW	2015-05-07	14:49:17	31	2	NOSTIM	72	7	0
ISONEW	2015-05-07	14:49:17	33	1	NOSTIM	72	8	0
ISONEW	2015-05-07	14:49:17	25	2	PP6P120	73	1	53
ISONEW	2015-05-07	14:49:17	2	1	PP6P120	73	2	86
ISONEW	2015-05-07	14:49:17	27	3	PP6P120	73	3	61
ISONEW	2015-05-07	14:49:17	28	4	PP6P120	73	4	78
ISONEW	2015-05-07	14:49:17	29	4	PP6P120	73	5	187
ISONEW	2015-05-07	14:49:17	14	5	PP6P120	73	6	123
ISONEW	2015-05-07	14:49:17	31	2	PP6P120	73	7	206
ISONEW	2015-05-07	14:49:17	33	1	PP6P120	73	8	6
ISONEW	2015-05-07	14:49:17	25	2	NOSTIM	74	1	0
ISONEW	2015-05-07	14:49:17	2	1	NOSTIM	74	2	0
ISONEW	2015-05-07	14:49:17	27	3	NOSTIM	74	3	0
ISONEW	2015-05-07	14:49:17	28	4	NOSTIM	74	4	0
ISONEW	2015-05-07	14:49:17	29	4	NOSTIM	74	5	0
ISONEW	2015-05-07	14:49:17	14	5	NOSTIM	74	6	5
ISONEW	2015-05-07	14:49:17	31	2	NOSTIM	74	7	0
ISONEW	2015-05-07	14:49:17	33	1	NOSTIM	74	8	0
ISONEW	2015-05-07	14:49:17	25	2	P120	75	1	262
ISONEW	2015-05-07	14:49:17	2	1	P120	75	2	101
ISONEW	2015-05-07	14:49:17	27	3	P120	75	3	176
ISONEW	2015-05-07	14:49:17	28	4	P120	75	4	105
ISONEW	2015-05-07	14:49:17	29	4	P120	75	5	524
ISONEW	2015-05-07	14:49:17	14	5	P120	75	6	19
ISONEW	2015-05-07	14:49:17	31	2	P120	75	7	207
ISONEW	2015-05-07	14:49:17	33	1	P120	75	8	32
ISONEW	2015-05-07	14:49:17	25	2	NOSTIM	76	1	0
ISONEW	2015-05-07	14:49:17	2	1	NOSTIM	76	2	0
ISONEW	2015-05-07	14:49:17	27	3	NOSTIM	76	3	0
ISONEW	2015-05-07	14:49:17	28	4	NOSTIM	76	4	0
ISONEW	2015-05-07	14:49:17	29	4	NOSTIM	76	5	0
ISONEW	2015-05-07	14:49:17	14	5	NOSTIM	76	6	17
ISONEW	2015-05-07	14:49:17	31	2	NOSTIM	76	7	0
ISONEW	2015-05-07	14:49:17	33	1	NOSTIM	76	8	0
ISONEW	2015-05-07	14:49:17	25	2	PP12P120	77	1	32
ISONEW	2015-05-07	14:49:17	2	1	PP12P120	77	2	24
ISONEW	2015-05-07	14:49:17	27	3	PP12P120	77	3	41
ISONEW	2015-05-07	14:49:17	28	4	PP12P120	77	4	32
ISONEW	2015-05-07	14:49:17	29	4	PP12P120	77	5	32
ISONEW	2015-05-07	14:49:17	14	5	PP12P120	77	6	59
ISONEW	2015-05-07	14:49:17	31	2	PP12P120	77	7	167
ISONEW	2015-05-07	14:49:17	33	1	PP12P120	77	8	6
ISONEW	2015-05-07	14:49:17	25	2	NOSTIM	78	1	0
ISONEW	2015-05-07	14:49:17	2	1	NOSTIM	78	2	0
ISONEW	2015-05-07	14:49:17	27	3	NOSTIM	78	3	0
ISONEW	2015-05-07	14:49:17	28	4	NOSTIM	78	4	0
ISONEW	2015-05-07	14:49:17	29	4	NOSTIM	78	5	0
ISONEW	2015-05-07	14:49:17	14	5	NOSTIM	78	6	6
ISONEW	2015-05-07	14:49:17	31	2	NOSTIM	78	7	0
ISONEW	2015-05-07	14:49:17	33	1	NOSTIM	78	8	0
ISONEW	2015-05-07	14:49:17	25	2	P120	79	1	64
ISONEW	2015-05-07	14:49:17	2	1	P120	79	2	138
ISONEW	2015-05-07	14:49:17	27	3	P120	79	3	220
ISONEW	2015-05-07	14:49:17	28	4	P120	79	4	86
ISONEW	2015-05-07	14:49:17	29	4	P120	79	5	170
ISONEW	2015-05-07	14:49:17	14	5	P120	79	6	50
ISONEW	2015-05-07	14:49:17	31	2	P120	79	7	370
ISONEW	2015-05-07	14:49:17	33	1	P120	79	8	72
ISONEW	2015-05-07	14:49:17	25	2	NOSTIM	80	1	0
ISONEW	2015-05-07	14:49:17	2	1	NOSTIM	80	2	0
ISONEW	2015-05-07	14:49:17	27	3	NOSTIM	80	3	0
ISONEW	2015-05-07	14:49:17	28	4	NOSTIM	80	4	0
ISONEW	2015-05-07	14:49:17	29	4	NOSTIM	80	5	3
ISONEW	2015-05-07	14:49:17	14	5	NOSTIM	80	6	0
ISONEW	2015-05-07	14:49:17	31	2	NOSTIM	80	7	0
ISONEW	2015-05-07	14:49:17	33	1	NOSTIM	80	8	0
ISONEW	2015-05-07	14:49:17	25	2	PP3P120	81	1	81
ISONEW	2015-05-07	14:49:17	2	1	PP3P120	81	2	101
ISONEW	2015-05-07	14:49:17	27	3	PP3P120	81	3	248
ISONEW	2015-05-07	14:49:17	28	4	PP3P120	81	4	175
ISONEW	2015-05-07	14:49:17	29	4	PP3P120	81	5	187
ISONEW	2015-05-07	14:49:17	14	5	PP3P120	81	6	180
ISONEW	2015-05-07	14:49:17	31	2	PP3P120	81	7	315
ISONEW	2015-05-07	14:49:17	33	1	PP3P120	81	8	64
ISONEW	2015-05-07	14:49:17	25	2	NOSTIM	82	1	0
ISONEW	2015-05-07	14:49:17	2	1	NOSTIM	82	2	0
ISONEW	2015-05-07	14:49:17	27	3	NOSTIM	82	3	0
ISONEW	2015-05-07	14:49:17	28	4	NOSTIM	82	4	0
ISONEW	2015-05-07	14:49:17	29	4	NOSTIM	82	5	0
ISONEW	2015-05-07	14:49:17	14	5	NOSTIM	82	6	3
ISONEW	2015-05-07	14:49:17	31	2	NOSTIM	82	7	0
ISONEW	2015-05-07	14:49:17	33	1	NOSTIM	82	8	0
ISONEW	2015-05-07	14:49:17	25	2	PP12P120	83	1	19
ISONEW	2015-05-07	14:49:17	2	1	PP12P120	83	2	53
ISONEW	2015-05-07	14:49:17	27	3	PP12P120	83	3	56
ISONEW	2015-05-07	14:49:17	28	4	PP12P120	83	4	31
ISONEW	2015-05-07	14:49:17	29	4	PP12P120	83	5	191
ISONEW	2015-05-07	14:49:17	14	5	PP12P120	83	6	254
ISONEW	2015-05-07	14:49:17	31	2	PP12P120	83	7	127
ISONEW	2015-05-07	14:49:17	33	1	PP12P120	83	8	2
ISONEW	2015-05-07	14:49:17	25	2	NOSTIM	84	1	0
ISONEW	2015-05-07	14:49:17	2	1	NOSTIM	84	2	0
ISONEW	2015-05-07	14:49:17	27	3	NOSTIM	84	3	0
ISONEW	2015-05-07	14:49:17	28	4	NOSTIM	84	4	0
ISONEW	2015-05-07	14:49:17	29	4	NOSTIM	84	5	7
ISONEW	2015-05-07	14:49:17	14	5	NOSTIM	84	6	0
ISONEW	2015-05-07	14:49:17	31	2	NOSTIM	84	7	0
ISONEW	2015-05-07	14:49:17	33	1	NOSTIM	84	8	0
ISONEW	2015-05-07	14:49:17	25	2	PP3P120	85	1	28
ISONEW	2015-05-07	14:49:17	2	1	PP3P120	85	2	80
ISONEW	2015-05-07	14:49:17	27	3	PP3P120	85	3	79
ISONEW	2015-05-07	14:49:17	28	4	PP3P120	85	4	46
ISONEW	2015-05-07	14:49:17	29	4	PP3P120	85	5	86
ISONEW	2015-05-07	14:49:17	14	5	PP3P120	85	6	188
ISONEW	2015-05-07	14:49:17	31	2	PP3P120	85	7	299
ISONEW	2015-05-07	14:49:17	33	1	PP3P120	85	8	70
ISONEW	2015-05-07	14:49:17	25	2	NOSTIM	86	1	0
ISONEW	2015-05-07	14:49:17	2	1	NOSTIM	86	2	0
ISONEW	2015-05-07	14:49:17	27	3	NOSTIM	86	3	0
ISONEW	2015-05-07	14:49:17	28	4	NOSTIM	86	4	0
ISONEW	2015-05-07	14:49:17	29	4	NOSTIM	86	5	62
ISONEW	2015-05-07	14:49:17	14	5	NOSTIM	86	6	2
ISONEW	2015-05-07	14:49:17	31	2	NOSTIM	86	7	0
ISONEW	2015-05-07	14:49:17	33	1	NOSTIM	86	8	0
ISONEW	2015-05-07	14:49:17	25	2	PP12P120	87	1	19
ISONEW	2015-05-07	14:49:17	2	1	PP12P120	87	2	48
ISONEW	2015-05-07	14:49:17	27	3	PP12P120	87	3	64
ISONEW	2015-05-07	14:49:17	28	4	PP12P120	87	4	32
ISONEW	2015-05-07	14:49:17	29	4	PP12P120	87	5	96
ISONEW	2015-05-07	14:49:17	14	5	PP12P120	87	6	127
ISONEW	2015-05-07	14:49:17	31	2	PP12P120	87	7	348
ISONEW	2015-05-07	14:49:17	33	1	PP12P120	87	8	10
ISONEW	2015-05-07	14:49:17	25	2	NOSTIM	88	1	0
ISONEW	2015-05-07	14:49:17	2	1	NOSTIM	88	2	0
ISONEW	2015-05-07	14:49:17	27	3	NOSTIM	88	3	0
ISONEW	2015-05-07	14:49:17	28	4	NOSTIM	88	4	1
ISONEW	2015-05-07	14:49:17	29	4	NOSTIM	88	5	0
ISONEW	2015-05-07	14:49:17	14	5	NOSTIM	88	6	1
ISONEW	2015-05-07	14:49:17	31	2	NOSTIM	88	7	0
ISONEW	2015-05-07	14:49:17	33	1	NOSTIM	88	8	0
ISONEW	2015-05-07	14:49:17	25	2	PP6P120	89	1	28
ISONEW	2015-05-07	14:49:17	2	1	PP6P120	89	2	125
ISONEW	2015-05-07	14:49:17	27	3	PP6P120	89	3	46
ISONEW	2015-05-07	14:49:17	28	4	PP6P120	89	4	29
ISONEW	2015-05-07	14:49:17	29	4	PP6P120	89	5	87
ISONEW	2015-05-07	14:49:17	14	5	PP6P120	89	6	34
ISONEW	2015-05-07	14:49:17	31	2	PP6P120	89	7	269
ISONEW	2015-05-07	14:49:17	33	1	PP6P120	89	8	21
ISONEW	2015-05-07	14:49:17	25	2	NOSTIM	90	1	0
ISONEW	2015-05-07	14:49:17	2	1	NOSTIM	90	2	0
ISONEW	2015-05-07	14:49:17	27	3	NOSTIM	90	3	0
ISONEW	2015-05-07	14:49:17	28	4	NOSTIM	90	4	0
ISONEW	2015-05-07	14:49:17	29	4	NOSTIM	90	5	0
ISONEW	2015-05-07	14:49:17	14	5	NOSTIM	90	6	5
ISONEW	2015-05-07	14:49:17	31	2	NOSTIM	90	7	0
ISONEW	2015-05-07	14:49:17	33	1	NOSTIM	90	8	0
ISONEW	2015-05-07	14:49:17	25	2	P120	91	1	106
ISONEW	2015-05-07	14:49:17	2	1	P120	91	2	156
ISONEW	2015-05-07	14:49:17	27	3	P120	91	3	180
ISONEW	2015-05-07	14:49:17	28	4	P120	91	4	395
ISONEW	2015-05-07	14:49:17	29	4	P120	91	5	65
ISONEW	2015-05-07	14:49:17	14	5	P120	91	6	63
ISONEW	2015-05-07	14:49:17	31	2	P120	91	7	615
ISONEW	2015-05-07	14:49:17	33	1	P120	91	8	50
ISONEW	2015-05-07	14:49:17	25	2	NOSTIM	92	1	0
ISONEW	2015-05-07	14:49:17	2	1	NOSTIM	92	2	0
ISONEW	2015-05-07	14:49:17	27	3	NOSTIM	92	3	0
ISONEW	2015-05-07	14:49:17	28	4	NOSTIM	92	4	0
ISONEW	2015-05-07	14:49:17	29	4	NOSTIM	92	5	21
ISONEW	2015-05-07	14:49:17	14	5	NOSTIM	92	6	0
ISONEW	2015-05-07	14:49:17	31	2	NOSTIM	92	7	0
ISONEW	2015-05-07	14:49:17	33	1	NOSTIM	92	8	0
ISONEW	2015-05-07	14:49:17	25	2	PP3P120	93	1	70
ISONEW	2015-05-07	14:49:17	2	1	PP3P120	93	2	126
ISONEW	2015-05-07	14:49:17	27	3	PP3P120	93	3	86
ISONEW	2015-05-07	14:49:17	28	4	PP3P120	93	4	261
ISONEW	2015-05-07	14:49:17	29	4	PP3P120	93	5	57
ISONEW	2015-05-07	14:49:17	14	5	PP3P120	93	6	138
ISONEW	2015-05-07	14:49:17	31	2	PP3P120	93	7	286
ISONEW	2015-05-07	14:49:17	33	1	PP3P120	93	8	15
ISONEW	2015-05-07	14:49:17	25	2	NOSTIM	94	1	0
ISONEW	2015-05-07	14:49:17	2	1	NOSTIM	94	2	0
ISONEW	2015-05-07	14:49:17	27	3	NOSTIM	94	3	0
ISONEW	2015-05-07	14:49:17	28	4	NOSTIM	94	4	0
ISONEW	2015-05-07	14:49:17	29	4	NOSTIM	94	5	0
ISONEW	2015-05-07	14:49:17	14	5	NOSTIM	94	6	0
ISONEW	2015-05-07	14:49:17	31	2	NOSTIM	94	7	0
ISONEW	2015-05-07	14:49:17	33	1	NOSTIM	94	8	0
ISONEW	2015-05-07	14:49:17	25	2	PP12P120	95	1	16
ISONEW	2015-05-07	14:49:17	2	1	PP12P120	95	2	94
ISONEW	2015-05-07	14:49:17	27	3	PP12P120	95	3	34
ISONEW	2015-05-07	14:49:17	28	4	PP12P120	95	4	252
ISONEW	2015-05-07	14:49:17	29	4	PP12P120	95	5	31
ISONEW	2015-05-07	14:49:17	14	5	PP12P120	95	6	22
ISONEW	2015-05-07	14:49:17	31	2	PP12P120	95	7	260
ISONEW	2015-05-07	14:49:17	33	1	PP12P120	95	8	12
ISONEW	2015-05-07	14:49:17	25	2	NOSTIM	96	1	0
ISONEW	2015-05-07	14:49:17	2	1	NOSTIM	96	2	0
ISONEW	2015-05-07	14:49:17	27	3	NOSTIM	96	3	0
ISONEW	2015-05-07	14:49:17	28	4	NOSTIM	96	4	0
ISONEW	2015-05-07	14:49:17	29	4	NOSTIM	96	5	1
ISONEW	2015-05-07	14:49:17	14	5	NOSTIM	96	6	0
ISONEW	2015-05-07	14:49:17	31	2	NOSTIM	96	7	0
ISONEW	2015-05-07	14:49:17	33	1	NOSTIM	96	8	0
ISONEW	2015-05-07	14:49:17	25	2	PP6P120	97	1	58
ISONEW	2015-05-07	14:49:17	2	1	PP6P120	97	2	80
ISONEW	2015-05-07	14:49:17	27	3	PP6P120	97	3	119
ISONEW	2015-05-07	14:49:17	28	4	PP6P120	97	4	246
ISONEW	2015-05-07	14:49:17	29	4	PP6P120	97	5	119
ISONEW	2015-05-07	14:49:17	14	5	PP6P120	97	6	97
ISONEW	2015-05-07	14:49:17	31	2	PP6P120	97	7	341
ISONEW	2015-05-07	14:49:17	33	1	PP6P120	97	8	46
ISONEW	2015-05-07	14:49:17	25	2	NOSTIM	98	1	0
ISONEW	2015-05-07	14:49:17	2	1	NOSTIM	98	2	0
ISONEW	2015-05-07	14:49:17	27	3	NOSTIM	98	3	0
ISONEW	2015-05-07	14:49:17	28	4	NOSTIM	98	4	0
ISONEW	2015-05-07	14:49:17	29	4	NOSTIM	98	5	0
ISONEW	2015-05-07	14:49:17	14	5	NOSTIM	98	6	0
ISONEW	2015-05-07	14:49:17	31	2	NOSTIM	98	7	0
ISONEW	2015-05-07	14:49:17	33	1	NOSTIM	98	8	0
ISONEW	2015-05-07	14:49:17	25	2	P120	99	1	150
ISONEW	2015-05-07	14:49:17	2	1	P120	99	2	141
ISONEW	2015-05-07	14:49:17	27	3	P120	99	3	146
ISONEW	2015-05-07	14:49:17	28	4	P120	99	4	397
ISONEW	2015-05-07	14:49:17	29	4	P120	99	5	146
ISONEW	2015-05-07	14:49:17	14	5	P120	99	6	37
ISONEW	2015-05-07	14:49:17	31	2	P120	99	7	604
ISONEW	2015-05-07	14:49:17	33	1	P120	99	8	60
ISONEW	2015-05-07	14:49:17	25	2	NOSTIM	100	1	0
ISONEW	2015-05-07	14:49:17	2	1	NOSTIM	100	2	0
ISONEW	2015-05-07	14:49:17	27	3	NOSTIM	100	3	0
ISONEW	2015-05-07	14:49:17	28	4	NOSTIM	100	4	0
ISONEW	2015-05-07	14:49:17	29	4	NOSTIM	100	5	0
ISONEW	2015-05-07	14:49:17	14	5	NOSTIM	100	6	69
ISONEW	2015-05-07	14:49:17	31	2	NOSTIM	100	7	0
ISONEW	2015-05-07	14:49:17	33	1	NOSTIM	100	8	4
ISONEW	2015-05-07	14:49:17	25	2	PP3P120	101	1	36
ISONEW	2015-05-07	14:49:17	2	1	PP3P120	101	2	131
ISONEW	2015-05-07	14:49:17	27	3	PP3P120	101	3	108
ISONEW	2015-05-07	14:49:17	28	4	PP3P120	101	4	179
ISONEW	2015-05-07	14:49:17	29	4	PP3P120	101	5	51
ISONEW	2015-05-07	14:49:17	14	5	PP3P120	101	6	86
ISONEW	2015-05-07	14:49:17	31	2	PP3P120	101	7	389
ISONEW	2015-05-07	14:49:17	33	1	PP3P120	101	8	68
ISONEW	2015-05-07	14:49:17	25	2	NOSTIM	102	1	0
ISONEW	2015-05-07	14:49:17	2	1	NOSTIM	102	2	0
ISONEW	2015-05-07	14:49:17	27	3	NOSTIM	102	3	0
ISONEW	2015-05-07	14:49:17	28	4	NOSTIM	102	4	0
ISONEW	2015-05-07	14:49:17	29	4	NOSTIM	102	5	3
ISONEW	2015-05-07	14:49:17	14	5	NOSTIM	102	6	0
ISONEW	2015-05-07	14:49:17	31	2	NOSTIM	102	7	0
ISONEW	2015-05-07	14:49:17	33	1	NOSTIM	102	8	0
ISONEW	2015-05-07	14:49:17	25	2	PP12P120	103	1	47
ISONEW	2015-05-07	14:49:17	2	1	PP12P120	103	2	87
ISONEW	2015-05-07	14:49:17	27	3	PP12P120	103	3	120
ISONEW	2015-05-07	14:49:17	28	4	PP12P120	103	4	283
ISONEW	2015-05-07	14:49:17	29	4	PP12P120	103	5	25
ISONEW	2015-05-07	14:49:17	14	5	PP12P120	103	6	66
ISONEW	2015-05-07	14:49:17	31	2	PP12P120	103	7	140
ISONEW	2015-05-07	14:49:17	33	1	PP12P120	103	8	107
ISONEW	2015-05-07	14:49:17	25	2	NOSTIM	104	1	0
ISONEW	2015-05-07	14:49:17	2	1	NOSTIM	104	2	0
ISONEW	2015-05-07	14:49:17	27	3	NOSTIM	104	3	0
ISONEW	2015-05-07	14:49:17	28	4	NOSTIM	104	4	6
ISONEW	2015-05-07	14:49:17	29	4	NOSTIM	104	5	0
ISONEW	2015-05-07	14:49:17	14	5	NOSTIM	104	6	3
ISONEW	2015-05-07	14:49:17	31	2	NOSTIM	104	7	0
ISONEW	2015-05-07	14:49:17	33	1	NOSTIM	104	8	2
ISONEW	2015-05-07	14:49:17	25	2	P120	105	1	161
ISONEW	2015-05-07	14:49:17	2	1	P120	105	2	249
ISONEW	2015-05-07	14:49:17	27	3	P120	105	3	126
ISONEW	2015-05-07	14:49:17	28	4	P120	105	4	235
ISONEW	2015-05-07	14:49:17	29	4	P120	105	5	326
ISONEW	2015-05-07	14:49:17	14	5	P120	105	6	15
ISONEW	2015-05-07	14:49:17	31	2	P120	105	7	539
ISONEW	2015-05-07	14:49:17	33	1	P120	105	8	37
ISONEW	2015-05-07	14:49:17	25	2	NOSTIM	106	1	0
ISONEW	2015-05-07	14:49:17	2	1	NOSTIM	106	2	0
ISONEW	2015-05-07	14:49:17	27	3	NOSTIM	106	3	0
ISONEW	2015-05-07	14:49:17	28	4	NOSTIM	106	4	9
ISONEW	2015-05-07	14:49:17	29	4	NOSTIM	106	5	2
ISONEW	2015-05-07	14:49:17	14	5	NOSTIM	106	6	0
ISONEW	2015-05-07	14:49:17	31	2	NOSTIM	106	7	0
ISONEW	2015-05-07	14:49:17	33	1	NOSTIM	106	8	0
ISONEW	2015-05-07	14:49:17	25	2	PP6P120	107	1	43
ISONEW	2015-05-07	14:49:17	2	1	PP6P120	107	2	40
ISONEW	2015-05-07	14:49:17	27	3	PP6P120	107	3	137
ISONEW	2015-05-07	14:49:17	28	4	PP6P120	107	4	42
ISONEW	2015-05-07	14:49:17	29	4	PP6P120	107	5	183
ISONEW	2015-05-07	14:49:17	14	5	PP6P120	107	6	48
ISONEW	2015-05-07	14:49:17	31	2	PP6P120	107	7	241
ISONEW	2015-05-07	14:49:17	33	1	PP6P120	107	8	90
ISONEW	2015-05-07	14:49:17	25	2	NOSTIM	108	1	0
ISONEW	2015-05-07	14:49:17	2	1	NOSTIM	108	2	0
ISONEW	2015-05-07	14:49:17	27	3	NOSTIM	108	3	0
ISONEW	2015-05-07	14:49:17	28	4	NOSTIM	108	4	0
ISONEW	2015-05-07	14:49:17	29	4	NOSTIM	108	5	0
ISONEW	2015-05-07	14:49:17	14	5	NOSTIM	108	6	2
ISONEW	2015-05-07	14:49:17	31	2	NOSTIM	108	7	0
ISONEW	2015-05-07	14:49:17	33	1	NOSTIM	108	8	0
ISONEW	2015-05-07	14:49:17	25	2	P120	109	1	48
ISONEW	2015-05-07	14:49:17	2	1	P120	109	2	102
ISONEW	2015-05-07	14:49:17	27	3	P120	109	3	122
ISONEW	2015-05-07	14:49:17	28	4	P120	109	4	289
ISONEW	2015-05-07	14:49:17	29	4	P120	109	5	167
ISONEW	2015-05-07	14:49:17	14	5	P120	109	6	61
ISONEW	2015-05-07	14:49:17	31	2	P120	109	7	604
ISONEW	2015-05-07	14:49:17	33	1	P120	109	8	46
ISONEW	2015-05-07	14:49:17	25	2	NOSTIM	110	1	0
ISONEW	2015-05-07	14:49:17	2	1	NOSTIM	110	2	0
ISONEW	2015-05-07	14:49:17	27	3	NOSTIM	110	3	0
ISONEW	2015-05-07	14:49:17	28	4	NOSTIM	110	4	0
ISONEW	2015-05-07	14:49:17	29	4	NOSTIM	110	5	2
ISONEW	2015-05-07	14:49:17	14	5	NOSTIM	110	6	21
ISONEW	2015-05-07	14:49:17	31	2	NOSTIM	110	7	0
ISONEW	2015-05-07	14:49:17	33	1	NOSTIM	110	8	0
ISONEW	2015-05-07	14:49:17	25	2	P120	111	1	341
ISONEW	2015-05-07	14:49:17	2	1	P120	111	2	229
ISONEW	2015-05-07	14:49:17	27	3	P120	111	3	165
ISONEW	2015-05-07	14:49:17	28	4	P120	111	4	657
ISONEW	2015-05-07	14:49:17	29	4	P120	111	5	298
ISONEW	2015-05-07	14:49:17	14	5	P120	111	6	29
ISONEW	2015-05-07	14:49:17	31	2	P120	111	7	299
ISONEW	2015-05-07	14:49:17	33	1	P120	111	8	103
ISONEW	2015-05-07	14:49:17	25	2	NOSTIM	112	1	0
ISONEW	2015-05-07	14:49:17	2	1	NOSTIM	112	2	2
ISONEW	2015-05-07	14:49:17	27	3	NOSTIM	112	3	0
ISONEW	2015-05-07	14:49:17	28	4	NOSTIM	112	4	0
ISONEW	2015-05-07	14:49:17	29	4	NOSTIM	112	5	0
ISONEW	2015-05-07	14:49:17	14	5	NOSTIM	112	6	16
ISONEW	2015-05-07	14:49:17	31	2	NOSTIM	112	7	0
ISONEW	2015-05-07	14:49:17	33	1	NOSTIM	112	8	5
ISONEW	2015-05-07	14:49:17	25	2	P120	113	1	143
ISONEW	2015-05-07	14:49:17	2	1	P120	113	2	196
ISONEW	2015-05-07	14:49:17	27	3	P120	113	3	157
ISONEW	2015-05-07	14:49:17	28	4	P120	113	4	358
ISONEW	2015-05-07	14:49:17	29	4	P120	113	5	558
ISONEW	2015-05-07	14:49:17	14	5	P120	113	6	16
ISONEW	2015-05-07	14:49:17	31	2	P120	113	7	400
ISONEW	2015-05-07	14:49:17	33	1	P120	113	8	70
ISONEW	2015-05-07	14:49:17	25	2	NOSTIM	114	1	0
ISONEW	2015-05-07	14:49:17	2	1	NOSTIM	114	2	0
ISONEW	2015-05-07	14:49:17	27	3	NOSTIM	114	3	0
ISONEW	2015-05-07	14:49:17	28	4	NOSTIM	114	4	1
ISONEW	2015-05-07	14:49:17	29	4	NOSTIM	114	5	1
ISONEW	2015-05-07	14:49:17	14	5	NOSTIM	114	6	7
ISONEW	2015-05-07	14:49:17	31	2	NOSTIM	114	7	0
ISONEW	2015-05-07	14:49:17	33	1	NOSTIM	114	8	0
ISONEW	2015-05-07	14:49:17	25	2	P120	115	1	44
ISONEW	2015-05-07	14:49:17	2	1	P120	115	2	40
ISONEW	2015-05-07	14:49:17	27	3	P120	115	3	205
ISONEW	2015-05-07	14:49:17	28	4	P120	115	4	470
ISONEW	2015-05-07	14:49:17	29	4	P120	115	5	73
ISONEW	2015-05-07	14:49:17	14	5	P120	115	6	63
ISONEW	2015-05-07	14:49:17	31	2	P120	115	7	298
ISONEW	2015-05-07	14:49:17	33	1	P120	115	8	78
ISONEW	2015-05-07	14:49:17	25	2	NOSTIM	116	1	0
ISONEW	2015-05-07	14:49:17	2	1	NOSTIM	116	2	2
ISONEW	2015-05-07	14:49:17	27	3	NOSTIM	116	3	0
ISONEW	2015-05-07	14:49:17	28	4	NOSTIM	116	4	0
ISONEW	2015-05-07	14:49:17	29	4	NOSTIM	116	5	0
ISONEW	2015-05-07	14:49:17	14	5	NOSTIM	116	6	0
ISONEW	2015-05-07	14:49:17	31	2	NOSTIM	116	7	5
ISONEW	2015-05-07	14:49:17	33	1	NOSTIM	116	8	6
ISONEW	2015-05-07	14:49:17	25	2	P120	117	1	51
ISONEW	2015-05-07	14:49:17	2	1	P120	117	2	545
ISONEW	2015-05-07	14:49:17	27	3	P120	117	3	174
ISONEW	2015-05-07	14:49:17	28	4	P120	117	4	148
ISONEW	2015-05-07	14:49:17	29	4	P120	117	5	298
ISONEW	2015-05-07	14:49:17	14	5	P120	117	6	60
ISONEW	2015-05-07	14:49:17	31	2	P120	117	7	603
ISONEW	2015-05-07	14:49:17	33	1	P120	117	8	197
ISONEW	2015-05-07	14:49:17	25	2	NOSTIM	118	1	0
ISONEW	2015-05-07	14:49:17	2	1	NOSTIM	118	2	0
ISONEW	2015-05-07	14:49:17	27	3	NOSTIM	118	3	0
ISONEW	2015-05-07	14:49:17	28	4	NOSTIM	118	4	0
ISONEW	2015-05-07	14:49:17	29	4	NOSTIM	118	5	1
ISONEW	2015-05-07	14:49:17	14	5	NOSTIM	118	6	3
ISONEW	2015-05-07	14:49:17	31	2	NOSTIM	118	7	0
ISONEW	2015-05-07	14:49:17	33	1	NOSTIM	118	8	0
ISONEW	2015-05-07	14:49:17	25	2	P120	119	1	50
ISONEW	2015-05-07	14:49:17	2	1	P120	119	2	121
ISONEW	2015-05-07	14:49:17	27	3	P120	119	3	144
ISONEW	2015-05-07	14:49:17	28	4	P120	119	4	301
ISONEW	2015-05-07	14:49:17	29	4	P120	119	5	291
ISONEW	2015-05-07	14:49:17	14	5	P120	119	6	116
ISONEW	2015-05-07	14:49:17	31	2	P120	119	7	586
ISONEW	2015-05-07	14:49:17	33	1	P120	119	8	49
ISONEW	2015-05-07	14:49:17	25	2	NOSTIM	120	1	5
ISONEW	2015-05-07	14:49:17	2	1	NOSTIM	120	2	0
ISONEW	2015-05-07	14:49:17	27	3	NOSTIM	120	3	0
ISONEW	2015-05-07	14:49:17	28	4	NOSTIM	120	4	3
ISONEW	2015-05-07	14:49:17	29	4	NOSTIM	120	5	13
ISONEW	2015-05-07	14:49:17	14	5	NOSTIM	120	6	0
ISONEW	2015-05-07	14:49:17	31	2	NOSTIM	120	7	0
ISONEW	2015-05-07	14:49:17	33	1	NOSTIM	120	8	0
ISONEW	2015-05-07	15:39:30	57	4	P120	1	1	151
ISONEW	2015-05-07	15:39:30	58	3	P120	1	2	1244
ISONEW	2015-05-07	15:39:30	51	5	P120	1	3	312
ISONEW	2015-05-07	15:39:30	999	999	P120	1	4	168
ISONEW	2015-05-07	15:39:30	53	2	P120	1	5	1881
ISONEW	2015-05-07	15:39:30	54	1	P120	1	6	762
ISONEW	2015-05-07	15:39:30	39	4	P120	1	7	375
ISONEW	2015-05-07	15:39:30	40	3	P120	1	8	1630
ISONEW	2015-05-07	15:39:30	57	4	NOSTIM	2	1	0
ISONEW	2015-05-07	15:39:30	58	3	NOSTIM	2	2	0
ISONEW	2015-05-07	15:39:30	51	5	NOSTIM	2	3	0
ISONEW	2015-05-07	15:39:30	999	999	NOSTIM	2	4	0
ISONEW	2015-05-07	15:39:30	53	2	NOSTIM	2	5	0
ISONEW	2015-05-07	15:39:30	54	1	NOSTIM	2	6	0
ISONEW	2015-05-07	15:39:30	39	4	NOSTIM	2	7	0
ISONEW	2015-05-07	15:39:30	40	3	NOSTIM	2	8	0
ISONEW	2015-05-07	15:39:30	57	4	P120	3	1	843
ISONEW	2015-05-07	15:39:30	58	3	P120	3	2	1270
ISONEW	2015-05-07	15:39:30	51	5	P120	3	3	319
ISONEW	2015-05-07	15:39:30	999	999	P120	3	4	125
ISONEW	2015-05-07	15:39:30	53	2	P120	3	5	348
ISONEW	2015-05-07	15:39:30	54	1	P120	3	6	542
ISONEW	2015-05-07	15:39:30	39	4	P120	3	7	1601
ISONEW	2015-05-07	15:39:30	40	3	P120	3	8	1967
ISONEW	2015-05-07	15:39:30	57	4	NOSTIM	4	1	0
ISONEW	2015-05-07	15:39:30	58	3	NOSTIM	4	2	0
ISONEW	2015-05-07	15:39:30	51	5	NOSTIM	4	3	0
ISONEW	2015-05-07	15:39:30	999	999	NOSTIM	4	4	0
ISONEW	2015-05-07	15:39:30	53	2	NOSTIM	4	5	0
ISONEW	2015-05-07	15:39:30	54	1	NOSTIM	4	6	0
ISONEW	2015-05-07	15:39:30	39	4	NOSTIM	4	7	0
ISONEW	2015-05-07	15:39:30	40	3	NOSTIM	4	8	0
ISONEW	2015-05-07	15:39:30	57	4	P120	5	1	351
ISONEW	2015-05-07	15:39:30	58	3	P120	5	2	1362
ISONEW	2015-05-07	15:39:30	51	5	P120	5	3	425
ISONEW	2015-05-07	15:39:30	999	999	P120	5	4	50
ISONEW	2015-05-07	15:39:30	53	2	P120	5	5	289
ISONEW	2015-05-07	15:39:30	54	1	P120	5	6	928
ISONEW	2015-05-07	15:39:30	39	4	P120	5	7	297
ISONEW	2015-05-07	15:39:30	40	3	P120	5	8	562
ISONEW	2015-05-07	15:39:30	57	4	NOSTIM	6	1	0
ISONEW	2015-05-07	15:39:30	58	3	NOSTIM	6	2	0
ISONEW	2015-05-07	15:39:30	51	5	NOSTIM	6	3	7
ISONEW	2015-05-07	15:39:30	999	999	NOSTIM	6	4	0
ISONEW	2015-05-07	15:39:30	53	2	NOSTIM	6	5	0
ISONEW	2015-05-07	15:39:30	54	1	NOSTIM	6	6	0
ISONEW	2015-05-07	15:39:30	39	4	NOSTIM	6	7	0
ISONEW	2015-05-07	15:39:30	40	3	NOSTIM	6	8	0
ISONEW	2015-05-07	15:39:30	57	4	P120	7	1	667
ISONEW	2015-05-07	15:39:30	58	3	P120	7	2	1595
ISONEW	2015-05-07	15:39:30	51	5	P120	7	3	608
ISONEW	2015-05-07	15:39:30	999	999	P120	7	4	86
ISONEW	2015-05-07	15:39:30	53	2	P120	7	5	63
ISONEW	2015-05-07	15:39:30	54	1	P120	7	6	551
ISONEW	2015-05-07	15:39:30	39	4	P120	7	7	388
ISONEW	2015-05-07	15:39:30	40	3	P120	7	8	1198
ISONEW	2015-05-07	15:39:30	57	4	NOSTIM	8	1	0
ISONEW	2015-05-07	15:39:30	58	3	NOSTIM	8	2	0
ISONEW	2015-05-07	15:39:30	51	5	NOSTIM	8	3	0
ISONEW	2015-05-07	15:39:30	999	999	NOSTIM	8	4	0
ISONEW	2015-05-07	15:39:30	53	2	NOSTIM	8	5	0
ISONEW	2015-05-07	15:39:30	54	1	NOSTIM	8	6	0
ISONEW	2015-05-07	15:39:30	39	4	NOSTIM	8	7	0
ISONEW	2015-05-07	15:39:30	40	3	NOSTIM	8	8	0
ISONEW	2015-05-07	15:39:30	57	4	P120	9	1	431
ISONEW	2015-05-07	15:39:30	58	3	P120	9	2	1490
ISONEW	2015-05-07	15:39:30	51	5	P120	9	3	560
ISONEW	2015-05-07	15:39:30	999	999	P120	9	4	87
ISONEW	2015-05-07	15:39:30	53	2	P120	9	5	123
ISONEW	2015-05-07	15:39:30	54	1	P120	9	6	442
ISONEW	2015-05-07	15:39:30	39	4	P120	9	7	341
ISONEW	2015-05-07	15:39:30	40	3	P120	9	8	1172
ISONEW	2015-05-07	15:39:30	57	4	NOSTIM	10	1	0
ISONEW	2015-05-07	15:39:30	58	3	NOSTIM	10	2	0
ISONEW	2015-05-07	15:39:30	51	5	NOSTIM	10	3	5
ISONEW	2015-05-07	15:39:30	999	999	NOSTIM	10	4	0
ISONEW	2015-05-07	15:39:30	53	2	NOSTIM	10	5	0
ISONEW	2015-05-07	15:39:30	54	1	NOSTIM	10	6	0
ISONEW	2015-05-07	15:39:30	39	4	NOSTIM	10	7	0
ISONEW	2015-05-07	15:39:30	40	3	NOSTIM	10	8	0
ISONEW	2015-05-07	15:39:30	57	4	P120	11	1	269
ISONEW	2015-05-07	15:39:30	58	3	P120	11	2	1243
ISONEW	2015-05-07	15:39:30	51	5	P120	11	3	345
ISONEW	2015-05-07	15:39:30	999	999	P120	11	4	124
ISONEW	2015-05-07	15:39:30	53	2	P120	11	5	116
ISONEW	2015-05-07	15:39:30	54	1	P120	11	6	558
ISONEW	2015-05-07	15:39:30	39	4	P120	11	7	763
ISONEW	2015-05-07	15:39:30	40	3	P120	11	8	1681
ISONEW	2015-05-07	15:39:30	57	4	NOSTIM	12	1	0
ISONEW	2015-05-07	15:39:30	58	3	NOSTIM	12	2	0
ISONEW	2015-05-07	15:39:30	51	5	NOSTIM	12	3	2
ISONEW	2015-05-07	15:39:30	999	999	NOSTIM	12	4	0
ISONEW	2015-05-07	15:39:30	53	2	NOSTIM	12	5	0
ISONEW	2015-05-07	15:39:30	54	1	NOSTIM	12	6	0
ISONEW	2015-05-07	15:39:30	39	4	NOSTIM	12	7	0
ISONEW	2015-05-07	15:39:30	40	3	NOSTIM	12	8	0
ISONEW	2015-05-07	15:39:30	57	4	PP6P120	13	1	266
ISONEW	2015-05-07	15:39:30	58	3	PP6P120	13	2	671
ISONEW	2015-05-07	15:39:30	51	5	PP6P120	13	3	319
ISONEW	2015-05-07	15:39:30	999	999	PP6P120	13	4	42
ISONEW	2015-05-07	15:39:30	53	2	PP6P120	13	5	19
ISONEW	2015-05-07	15:39:30	54	1	PP6P120	13	6	214
ISONEW	2015-05-07	15:39:30	39	4	PP6P120	13	7	612
ISONEW	2015-05-07	15:39:30	40	3	PP6P120	13	8	594
ISONEW	2015-05-07	15:39:30	57	4	NOSTIM	14	1	0
ISONEW	2015-05-07	15:39:30	58	3	NOSTIM	14	2	0
ISONEW	2015-05-07	15:39:30	51	5	NOSTIM	14	3	42
ISONEW	2015-05-07	15:39:30	999	999	NOSTIM	14	4	0
ISONEW	2015-05-07	15:39:30	53	2	NOSTIM	14	5	0
ISONEW	2015-05-07	15:39:30	54	1	NOSTIM	14	6	0
ISONEW	2015-05-07	15:39:30	39	4	NOSTIM	14	7	0
ISONEW	2015-05-07	15:39:30	40	3	NOSTIM	14	8	0
ISONEW	2015-05-07	15:39:30	57	4	PP12P120	15	1	137
ISONEW	2015-05-07	15:39:30	58	3	PP12P120	15	2	172
ISONEW	2015-05-07	15:39:30	51	5	PP12P120	15	3	156
ISONEW	2015-05-07	15:39:30	999	999	PP12P120	15	4	38
ISONEW	2015-05-07	15:39:30	53	2	PP12P120	15	5	12
ISONEW	2015-05-07	15:39:30	54	1	PP12P120	15	6	162
ISONEW	2015-05-07	15:39:30	39	4	PP12P120	15	7	69
ISONEW	2015-05-07	15:39:30	40	3	PP12P120	15	8	394
ISONEW	2015-05-07	15:39:30	57	4	NOSTIM	16	1	0
ISONEW	2015-05-07	15:39:30	58	3	NOSTIM	16	2	0
ISONEW	2015-05-07	15:39:30	51	5	NOSTIM	16	3	2
ISONEW	2015-05-07	15:39:30	999	999	NOSTIM	16	4	0
ISONEW	2015-05-07	15:39:30	53	2	NOSTIM	16	5	0
ISONEW	2015-05-07	15:39:30	54	1	NOSTIM	16	6	0
ISONEW	2015-05-07	15:39:30	39	4	NOSTIM	16	7	0
ISONEW	2015-05-07	15:39:30	40	3	NOSTIM	16	8	0
ISONEW	2015-05-07	15:39:30	57	4	PP3P120	17	1	988
ISONEW	2015-05-07	15:39:30	58	3	PP3P120	17	2	1194
ISONEW	2015-05-07	15:39:30	51	5	PP3P120	17	3	363
ISONEW	2015-05-07	15:39:30	999	999	PP3P120	17	4	35
ISONEW	2015-05-07	15:39:30	53	2	PP3P120	17	5	75
ISONEW	2015-05-07	15:39:30	54	1	PP3P120	17	6	232
ISONEW	2015-05-07	15:39:30	39	4	PP3P120	17	7	759
ISONEW	2015-05-07	15:39:30	40	3	PP3P120	17	8	426
ISONEW	2015-05-07	15:39:30	57	4	NOSTIM	18	1	0
ISONEW	2015-05-07	15:39:30	58	3	NOSTIM	18	2	0
ISONEW	2015-05-07	15:39:30	51	5	NOSTIM	18	3	48
ISONEW	2015-05-07	15:39:30	999	999	NOSTIM	18	4	0
ISONEW	2015-05-07	15:39:30	53	2	NOSTIM	18	5	0
ISONEW	2015-05-07	15:39:30	54	1	NOSTIM	18	6	6
ISONEW	2015-05-07	15:39:30	39	4	NOSTIM	18	7	0
ISONEW	2015-05-07	15:39:30	40	3	NOSTIM	18	8	0
ISONEW	2015-05-07	15:39:30	57	4	P120	19	1	1287
ISONEW	2015-05-07	15:39:30	58	3	P120	19	2	211
ISONEW	2015-05-07	15:39:30	51	5	P120	19	3	292
ISONEW	2015-05-07	15:39:30	999	999	P120	19	4	87
ISONEW	2015-05-07	15:39:30	53	2	P120	19	5	177
ISONEW	2015-05-07	15:39:30	54	1	P120	19	6	326
ISONEW	2015-05-07	15:39:30	39	4	P120	19	7	671
ISONEW	2015-05-07	15:39:30	40	3	P120	19	8	1450
ISONEW	2015-05-07	15:39:30	57	4	NOSTIM	20	1	0
ISONEW	2015-05-07	15:39:30	58	3	NOSTIM	20	2	0
ISONEW	2015-05-07	15:39:30	51	5	NOSTIM	20	3	0
ISONEW	2015-05-07	15:39:30	999	999	NOSTIM	20	4	0
ISONEW	2015-05-07	15:39:30	53	2	NOSTIM	20	5	0
ISONEW	2015-05-07	15:39:30	54	1	NOSTIM	20	6	0
ISONEW	2015-05-07	15:39:30	39	4	NOSTIM	20	7	0
ISONEW	2015-05-07	15:39:30	40	3	NOSTIM	20	8	0
ISONEW	2015-05-07	15:39:30	57	4	PP6P120	21	1	227
ISONEW	2015-05-07	15:39:30	58	3	PP6P120	21	2	363
ISONEW	2015-05-07	15:39:30	51	5	PP6P120	21	3	538
ISONEW	2015-05-07	15:39:30	999	999	PP6P120	21	4	52
ISONEW	2015-05-07	15:39:30	53	2	PP6P120	21	5	8
ISONEW	2015-05-07	15:39:30	54	1	PP6P120	21	6	75
ISONEW	2015-05-07	15:39:30	39	4	PP6P120	21	7	178
ISONEW	2015-05-07	15:39:30	40	3	PP6P120	21	8	670
ISONEW	2015-05-07	15:39:30	57	4	NOSTIM	22	1	0
ISONEW	2015-05-07	15:39:30	58	3	NOSTIM	22	2	0
ISONEW	2015-05-07	15:39:30	51	5	NOSTIM	22	3	0
ISONEW	2015-05-07	15:39:30	999	999	NOSTIM	22	4	0
ISONEW	2015-05-07	15:39:30	53	2	NOSTIM	22	5	0
ISONEW	2015-05-07	15:39:30	54	1	NOSTIM	22	6	0
ISONEW	2015-05-07	15:39:30	39	4	NOSTIM	22	7	0
ISONEW	2015-05-07	15:39:30	40	3	NOSTIM	22	8	0
ISONEW	2015-05-07	15:39:30	57	4	PP3P120	23	1	498
ISONEW	2015-05-07	15:39:30	58	3	PP3P120	23	2	225
ISONEW	2015-05-07	15:39:30	51	5	PP3P120	23	3	262
ISONEW	2015-05-07	15:39:30	999	999	PP3P120	23	4	41
ISONEW	2015-05-07	15:39:30	53	2	PP3P120	23	5	33
ISONEW	2015-05-07	15:39:30	54	1	PP3P120	23	6	169
ISONEW	2015-05-07	15:39:30	39	4	PP3P120	23	7	48
ISONEW	2015-05-07	15:39:30	40	3	PP3P120	23	8	395
ISONEW	2015-05-07	15:39:30	57	4	NOSTIM	24	1	0
ISONEW	2015-05-07	15:39:30	58	3	NOSTIM	24	2	0
ISONEW	2015-05-07	15:39:30	51	5	NOSTIM	24	3	37
ISONEW	2015-05-07	15:39:30	999	999	NOSTIM	24	4	0
ISONEW	2015-05-07	15:39:30	53	2	NOSTIM	24	5	0
ISONEW	2015-05-07	15:39:30	54	1	NOSTIM	24	6	0
ISONEW	2015-05-07	15:39:30	39	4	NOSTIM	24	7	0
ISONEW	2015-05-07	15:39:30	40	3	NOSTIM	24	8	0
ISONEW	2015-05-07	15:39:30	57	4	PP6P120	25	1	113
ISONEW	2015-05-07	15:39:30	58	3	PP6P120	25	2	156
ISONEW	2015-05-07	15:39:30	51	5	PP6P120	25	3	221
ISONEW	2015-05-07	15:39:30	999	999	PP6P120	25	4	41
ISONEW	2015-05-07	15:39:30	53	2	PP6P120	25	5	22
ISONEW	2015-05-07	15:39:30	54	1	PP6P120	25	6	19
ISONEW	2015-05-07	15:39:30	39	4	PP6P120	25	7	61
ISONEW	2015-05-07	15:39:30	40	3	PP6P120	25	8	452
ISONEW	2015-05-07	15:39:30	57	4	NOSTIM	26	1	0
ISONEW	2015-05-07	15:39:30	58	3	NOSTIM	26	2	0
ISONEW	2015-05-07	15:39:30	51	5	NOSTIM	26	3	0
ISONEW	2015-05-07	15:39:30	999	999	NOSTIM	26	4	0
ISONEW	2015-05-07	15:39:30	53	2	NOSTIM	26	5	0
ISONEW	2015-05-07	15:39:30	54	1	NOSTIM	26	6	0
ISONEW	2015-05-07	15:39:30	39	4	NOSTIM	26	7	0
ISONEW	2015-05-07	15:39:30	40	3	NOSTIM	26	8	0
ISONEW	2015-05-07	15:39:30	57	4	P120	27	1	386
ISONEW	2015-05-07	15:39:30	58	3	P120	27	2	98
ISONEW	2015-05-07	15:39:30	51	5	P120	27	3	334
ISONEW	2015-05-07	15:39:30	999	999	P120	27	4	108
ISONEW	2015-05-07	15:39:30	53	2	P120	27	5	99
ISONEW	2015-05-07	15:39:30	54	1	P120	27	6	161
ISONEW	2015-05-07	15:39:30	39	4	P120	27	7	28
ISONEW	2015-05-07	15:39:30	40	3	P120	27	8	1623
ISONEW	2015-05-07	15:39:30	57	4	NOSTIM	28	1	0
ISONEW	2015-05-07	15:39:30	58	3	NOSTIM	28	2	0
ISONEW	2015-05-07	15:39:30	51	5	NOSTIM	28	3	86
ISONEW	2015-05-07	15:39:30	999	999	NOSTIM	28	4	0
ISONEW	2015-05-07	15:39:30	53	2	NOSTIM	28	5	0
ISONEW	2015-05-07	15:39:30	54	1	NOSTIM	28	6	0
ISONEW	2015-05-07	15:39:30	39	4	NOSTIM	28	7	1
ISONEW	2015-05-07	15:39:30	40	3	NOSTIM	28	8	0
ISONEW	2015-05-07	15:39:30	57	4	PP12P120	29	1	30
ISONEW	2015-05-07	15:39:30	58	3	PP12P120	29	2	19
ISONEW	2015-05-07	15:39:30	51	5	PP12P120	29	3	69
ISONEW	2015-05-07	15:39:30	999	999	PP12P120	29	4	24
ISONEW	2015-05-07	15:39:30	53	2	PP12P120	29	5	2
ISONEW	2015-05-07	15:39:30	54	1	PP12P120	29	6	6
ISONEW	2015-05-07	15:39:30	39	4	PP12P120	29	7	1
ISONEW	2015-05-07	15:39:30	40	3	PP12P120	29	8	285
ISONEW	2015-05-07	15:39:30	57	4	NOSTIM	30	1	0
ISONEW	2015-05-07	15:39:30	58	3	NOSTIM	30	2	0
ISONEW	2015-05-07	15:39:30	51	5	NOSTIM	30	3	0
ISONEW	2015-05-07	15:39:30	999	999	NOSTIM	30	4	0
ISONEW	2015-05-07	15:39:30	53	2	NOSTIM	30	5	0
ISONEW	2015-05-07	15:39:30	54	1	NOSTIM	30	6	2
ISONEW	2015-05-07	15:39:30	39	4	NOSTIM	30	7	0
ISONEW	2015-05-07	15:39:30	40	3	NOSTIM	30	8	0
ISONEW	2015-05-07	15:39:30	57	4	P120	31	1	252
ISONEW	2015-05-07	15:39:30	58	3	P120	31	2	172
ISONEW	2015-05-07	15:39:30	51	5	P120	31	3	152
ISONEW	2015-05-07	15:39:30	999	999	P120	31	4	37
ISONEW	2015-05-07	15:39:30	53	2	P120	31	5	156
ISONEW	2015-05-07	15:39:30	54	1	P120	31	6	227
ISONEW	2015-05-07	15:39:30	39	4	P120	31	7	45
ISONEW	2015-05-07	15:39:30	40	3	P120	31	8	568
ISONEW	2015-05-07	15:39:30	57	4	NOSTIM	32	1	0
ISONEW	2015-05-07	15:39:30	58	3	NOSTIM	32	2	0
ISONEW	2015-05-07	15:39:30	51	5	NOSTIM	32	3	10
ISONEW	2015-05-07	15:39:30	999	999	NOSTIM	32	4	0
ISONEW	2015-05-07	15:39:30	53	2	NOSTIM	32	5	0
ISONEW	2015-05-07	15:39:30	54	1	NOSTIM	32	6	1
ISONEW	2015-05-07	15:39:30	39	4	NOSTIM	32	7	0
ISONEW	2015-05-07	15:39:30	40	3	NOSTIM	32	8	0
ISONEW	2015-05-07	15:39:30	57	4	PP3P120	33	1	203
ISONEW	2015-05-07	15:39:30	58	3	PP3P120	33	2	173
ISONEW	2015-05-07	15:39:30	51	5	PP3P120	33	3	169
ISONEW	2015-05-07	15:39:30	999	999	PP3P120	33	4	52
ISONEW	2015-05-07	15:39:30	53	2	PP3P120	33	5	24
ISONEW	2015-05-07	15:39:30	54	1	PP3P120	33	6	241
ISONEW	2015-05-07	15:39:30	39	4	PP3P120	33	7	42
ISONEW	2015-05-07	15:39:30	40	3	PP3P120	33	8	695
ISONEW	2015-05-07	15:39:30	57	4	NOSTIM	34	1	0
ISONEW	2015-05-07	15:39:30	58	3	NOSTIM	34	2	0
ISONEW	2015-05-07	15:39:30	51	5	NOSTIM	34	3	0
ISONEW	2015-05-07	15:39:30	999	999	NOSTIM	34	4	0
ISONEW	2015-05-07	15:39:30	53	2	NOSTIM	34	5	0
ISONEW	2015-05-07	15:39:30	54	1	NOSTIM	34	6	0
ISONEW	2015-05-07	15:39:30	39	4	NOSTIM	34	7	0
ISONEW	2015-05-07	15:39:30	40	3	NOSTIM	34	8	0
ISONEW	2015-05-07	15:39:30	57	4	PP12P120	35	1	196
ISONEW	2015-05-07	15:39:30	58	3	PP12P120	35	2	47
ISONEW	2015-05-07	15:39:30	51	5	PP12P120	35	3	176
ISONEW	2015-05-07	15:39:30	999	999	PP12P120	35	4	12
ISONEW	2015-05-07	15:39:30	53	2	PP12P120	35	5	24
ISONEW	2015-05-07	15:39:30	54	1	PP12P120	35	6	65
ISONEW	2015-05-07	15:39:30	39	4	PP12P120	35	7	10
ISONEW	2015-05-07	15:39:30	40	3	PP12P120	35	8	270
ISONEW	2015-05-07	15:39:30	57	4	NOSTIM	36	1	0
ISONEW	2015-05-07	15:39:30	58	3	NOSTIM	36	2	0
ISONEW	2015-05-07	15:39:30	51	5	NOSTIM	36	3	0
ISONEW	2015-05-07	15:39:30	999	999	NOSTIM	36	4	0
ISONEW	2015-05-07	15:39:30	53	2	NOSTIM	36	5	0
ISONEW	2015-05-07	15:39:30	54	1	NOSTIM	36	6	0
ISONEW	2015-05-07	15:39:30	39	4	NOSTIM	36	7	0
ISONEW	2015-05-07	15:39:30	40	3	NOSTIM	36	8	0
ISONEW	2015-05-07	15:39:30	57	4	PP3P120	37	1	152
ISONEW	2015-05-07	15:39:30	58	3	PP3P120	37	2	203
ISONEW	2015-05-07	15:39:30	51	5	PP3P120	37	3	418
ISONEW	2015-05-07	15:39:30	999	999	PP3P120	37	4	36
ISONEW	2015-05-07	15:39:30	53	2	PP3P120	37	5	72
ISONEW	2015-05-07	15:39:30	54	1	PP3P120	37	6	115
ISONEW	2015-05-07	15:39:30	39	4	PP3P120	37	7	38
ISONEW	2015-05-07	15:39:30	40	3	PP3P120	37	8	467
ISONEW	2015-05-07	15:39:30	57	4	NOSTIM	38	1	0
ISONEW	2015-05-07	15:39:30	58	3	NOSTIM	38	2	0
ISONEW	2015-05-07	15:39:30	51	5	NOSTIM	38	3	0
ISONEW	2015-05-07	15:39:30	999	999	NOSTIM	38	4	0
ISONEW	2015-05-07	15:39:30	53	2	NOSTIM	38	5	0
ISONEW	2015-05-07	15:39:30	54	1	NOSTIM	38	6	0
ISONEW	2015-05-07	15:39:30	39	4	NOSTIM	38	7	0
ISONEW	2015-05-07	15:39:30	40	3	NOSTIM	38	8	0
ISONEW	2015-05-07	15:39:30	57	4	PP12P120	39	1	47
ISONEW	2015-05-07	15:39:30	58	3	PP12P120	39	2	57
ISONEW	2015-05-07	15:39:30	51	5	PP12P120	39	3	78
ISONEW	2015-05-07	15:39:30	999	999	PP12P120	39	4	33
ISONEW	2015-05-07	15:39:30	53	2	PP12P120	39	5	4
ISONEW	2015-05-07	15:39:30	54	1	PP12P120	39	6	26
ISONEW	2015-05-07	15:39:30	39	4	PP12P120	39	7	12
ISONEW	2015-05-07	15:39:30	40	3	PP12P120	39	8	498
ISONEW	2015-05-07	15:39:30	57	4	NOSTIM	40	1	0
ISONEW	2015-05-07	15:39:30	58	3	NOSTIM	40	2	0
ISONEW	2015-05-07	15:39:30	51	5	NOSTIM	40	3	3
ISONEW	2015-05-07	15:39:30	999	999	NOSTIM	40	4	0
ISONEW	2015-05-07	15:39:30	53	2	NOSTIM	40	5	0
ISONEW	2015-05-07	15:39:30	54	1	NOSTIM	40	6	0
ISONEW	2015-05-07	15:39:30	39	4	NOSTIM	40	7	0
ISONEW	2015-05-07	15:39:30	40	3	NOSTIM	40	8	0
ISONEW	2015-05-07	15:39:30	57	4	PP6P120	41	1	56
ISONEW	2015-05-07	15:39:30	58	3	PP6P120	41	2	37
ISONEW	2015-05-07	15:39:30	51	5	PP6P120	41	3	130
ISONEW	2015-05-07	15:39:30	999	999	PP6P120	41	4	22
ISONEW	2015-05-07	15:39:30	53	2	PP6P120	41	5	5
ISONEW	2015-05-07	15:39:30	54	1	PP6P120	41	6	50
ISONEW	2015-05-07	15:39:30	39	4	PP6P120	41	7	6
ISONEW	2015-05-07	15:39:30	40	3	PP6P120	41	8	347
ISONEW	2015-05-07	15:39:30	57	4	NOSTIM	42	1	0
ISONEW	2015-05-07	15:39:30	58	3	NOSTIM	42	2	0
ISONEW	2015-05-07	15:39:30	51	5	NOSTIM	42	3	0
ISONEW	2015-05-07	15:39:30	999	999	NOSTIM	42	4	0
ISONEW	2015-05-07	15:39:30	53	2	NOSTIM	42	5	0
ISONEW	2015-05-07	15:39:30	54	1	NOSTIM	42	6	0
ISONEW	2015-05-07	15:39:30	39	4	NOSTIM	42	7	0
ISONEW	2015-05-07	15:39:30	40	3	NOSTIM	42	8	0
ISONEW	2015-05-07	15:39:30	57	4	P120	43	1	85
ISONEW	2015-05-07	15:39:30	58	3	P120	43	2	444
ISONEW	2015-05-07	15:39:30	51	5	P120	43	3	67
ISONEW	2015-05-07	15:39:30	999	999	P120	43	4	32
ISONEW	2015-05-07	15:39:30	53	2	P120	43	5	37
ISONEW	2015-05-07	15:39:30	54	1	P120	43	6	64
ISONEW	2015-05-07	15:39:30	39	4	P120	43	7	81
ISONEW	2015-05-07	15:39:30	40	3	P120	43	8	537
ISONEW	2015-05-07	15:39:30	57	4	NOSTIM	44	1	0
ISONEW	2015-05-07	15:39:30	58	3	NOSTIM	44	2	0
ISONEW	2015-05-07	15:39:30	51	5	NOSTIM	44	3	2
ISONEW	2015-05-07	15:39:30	999	999	NOSTIM	44	4	0
ISONEW	2015-05-07	15:39:30	53	2	NOSTIM	44	5	0
ISONEW	2015-05-07	15:39:30	54	1	NOSTIM	44	6	0
ISONEW	2015-05-07	15:39:30	39	4	NOSTIM	44	7	0
ISONEW	2015-05-07	15:39:30	40	3	NOSTIM	44	8	0
ISONEW	2015-05-07	15:39:30	57	4	PP3P120	45	1	57
ISONEW	2015-05-07	15:39:30	58	3	PP3P120	45	2	1087
ISONEW	2015-05-07	15:39:30	51	5	PP3P120	45	3	58
ISONEW	2015-05-07	15:39:30	999	999	PP3P120	45	4	35
ISONEW	2015-05-07	15:39:30	53	2	PP3P120	45	5	34
ISONEW	2015-05-07	15:39:30	54	1	PP3P120	45	6	81
ISONEW	2015-05-07	15:39:30	39	4	PP3P120	45	7	41
ISONEW	2015-05-07	15:39:30	40	3	PP3P120	45	8	495
ISONEW	2015-05-07	15:39:30	57	4	NOSTIM	46	1	0
ISONEW	2015-05-07	15:39:30	58	3	NOSTIM	46	2	0
ISONEW	2015-05-07	15:39:30	51	5	NOSTIM	46	3	16
ISONEW	2015-05-07	15:39:30	999	999	NOSTIM	46	4	0
ISONEW	2015-05-07	15:39:30	53	2	NOSTIM	46	5	0
ISONEW	2015-05-07	15:39:30	54	1	NOSTIM	46	6	0
ISONEW	2015-05-07	15:39:30	39	4	NOSTIM	46	7	0
ISONEW	2015-05-07	15:39:30	40	3	NOSTIM	46	8	0
ISONEW	2015-05-07	15:39:30	57	4	PP12P120	47	1	32
ISONEW	2015-05-07	15:39:30	58	3	PP12P120	47	2	37
ISONEW	2015-05-07	15:39:30	51	5	PP12P120	47	3	140
ISONEW	2015-05-07	15:39:30	999	999	PP12P120	47	4	9
ISONEW	2015-05-07	15:39:30	53	2	PP12P120	47	5	1
ISONEW	2015-05-07	15:39:30	54	1	PP12P120	47	6	37
ISONEW	2015-05-07	15:39:30	39	4	PP12P120	47	7	9
ISONEW	2015-05-07	15:39:30	40	3	PP12P120	47	8	216
ISONEW	2015-05-07	15:39:30	57	4	NOSTIM	48	1	0
ISONEW	2015-05-07	15:39:30	58	3	NOSTIM	48	2	0
ISONEW	2015-05-07	15:39:30	51	5	NOSTIM	48	3	0
ISONEW	2015-05-07	15:39:30	999	999	NOSTIM	48	4	0
ISONEW	2015-05-07	15:39:30	53	2	NOSTIM	48	5	0
ISONEW	2015-05-07	15:39:30	54	1	NOSTIM	48	6	0
ISONEW	2015-05-07	15:39:30	39	4	NOSTIM	48	7	0
ISONEW	2015-05-07	15:39:30	40	3	NOSTIM	48	8	0
ISONEW	2015-05-07	15:39:30	57	4	PP6P120	49	1	165
ISONEW	2015-05-07	15:39:30	58	3	PP6P120	49	2	410
ISONEW	2015-05-07	15:39:30	51	5	PP6P120	49	3	166
ISONEW	2015-05-07	15:39:30	999	999	PP6P120	49	4	37
ISONEW	2015-05-07	15:39:30	53	2	PP6P120	49	5	18
ISONEW	2015-05-07	15:39:30	54	1	PP6P120	49	6	30
ISONEW	2015-05-07	15:39:30	39	4	PP6P120	49	7	10
ISONEW	2015-05-07	15:39:30	40	3	PP6P120	49	8	578
ISONEW	2015-05-07	15:39:30	57	4	NOSTIM	50	1	0
ISONEW	2015-05-07	15:39:30	58	3	NOSTIM	50	2	0
ISONEW	2015-05-07	15:39:30	51	5	NOSTIM	50	3	1
ISONEW	2015-05-07	15:39:30	999	999	NOSTIM	50	4	0
ISONEW	2015-05-07	15:39:30	53	2	NOSTIM	50	5	0
ISONEW	2015-05-07	15:39:30	54	1	NOSTIM	50	6	0
ISONEW	2015-05-07	15:39:30	39	4	NOSTIM	50	7	0
ISONEW	2015-05-07	15:39:30	40	3	NOSTIM	50	8	0
ISONEW	2015-05-07	15:39:30	57	4	P120	51	1	111
ISONEW	2015-05-07	15:39:30	58	3	P120	51	2	420
ISONEW	2015-05-07	15:39:30	51	5	P120	51	3	259
ISONEW	2015-05-07	15:39:30	999	999	P120	51	4	26
ISONEW	2015-05-07	15:39:30	53	2	P120	51	5	8
ISONEW	2015-05-07	15:39:30	54	1	P120	51	6	146
ISONEW	2015-05-07	15:39:30	39	4	P120	51	7	65
ISONEW	2015-05-07	15:39:30	40	3	P120	51	8	477
ISONEW	2015-05-07	15:39:30	57	4	NOSTIM	52	1	0
ISONEW	2015-05-07	15:39:30	58	3	NOSTIM	52	2	0
ISONEW	2015-05-07	15:39:30	51	5	NOSTIM	52	3	35
ISONEW	2015-05-07	15:39:30	999	999	NOSTIM	52	4	0
ISONEW	2015-05-07	15:39:30	53	2	NOSTIM	52	5	0
ISONEW	2015-05-07	15:39:30	54	1	NOSTIM	52	6	0
ISONEW	2015-05-07	15:39:30	39	4	NOSTIM	52	7	0
ISONEW	2015-05-07	15:39:30	40	3	NOSTIM	52	8	0
ISONEW	2015-05-07	15:39:30	57	4	PP3P120	53	1	142
ISONEW	2015-05-07	15:39:30	58	3	PP3P120	53	2	295
ISONEW	2015-05-07	15:39:30	51	5	PP3P120	53	3	183
ISONEW	2015-05-07	15:39:30	999	999	PP3P120	53	4	29
ISONEW	2015-05-07	15:39:30	53	2	PP3P120	53	5	132
ISONEW	2015-05-07	15:39:30	54	1	PP3P120	53	6	21
ISONEW	2015-05-07	15:39:30	39	4	PP3P120	53	7	58
ISONEW	2015-05-07	15:39:30	40	3	PP3P120	53	8	534
ISONEW	2015-05-07	15:39:30	57	4	NOSTIM	54	1	0
ISONEW	2015-05-07	15:39:30	58	3	NOSTIM	54	2	0
ISONEW	2015-05-07	15:39:30	51	5	NOSTIM	54	3	0
ISONEW	2015-05-07	15:39:30	999	999	NOSTIM	54	4	0
ISONEW	2015-05-07	15:39:30	53	2	NOSTIM	54	5	0
ISONEW	2015-05-07	15:39:30	54	1	NOSTIM	54	6	0
ISONEW	2015-05-07	15:39:30	39	4	NOSTIM	54	7	0
ISONEW	2015-05-07	15:39:30	40	3	NOSTIM	54	8	0
ISONEW	2015-05-07	15:39:30	57	4	PP12P120	55	1	77
ISONEW	2015-05-07	15:39:30	58	3	PP12P120	55	2	66
ISONEW	2015-05-07	15:39:30	51	5	PP12P120	55	3	237
ISONEW	2015-05-07	15:39:30	999	999	PP12P120	55	4	8
ISONEW	2015-05-07	15:39:30	53	2	PP12P120	55	5	15
ISONEW	2015-05-07	15:39:30	54	1	PP12P120	55	6	2
ISONEW	2015-05-07	15:39:30	39	4	PP12P120	55	7	16
ISONEW	2015-05-07	15:39:30	40	3	PP12P120	55	8	204
ISONEW	2015-05-07	15:39:30	57	4	NOSTIM	56	1	0
ISONEW	2015-05-07	15:39:30	58	3	NOSTIM	56	2	0
ISONEW	2015-05-07	15:39:30	51	5	NOSTIM	56	3	0
ISONEW	2015-05-07	15:39:30	999	999	NOSTIM	56	4	0
ISONEW	2015-05-07	15:39:30	53	2	NOSTIM	56	5	0
ISONEW	2015-05-07	15:39:30	54	1	NOSTIM	56	6	0
ISONEW	2015-05-07	15:39:30	39	4	NOSTIM	56	7	0
ISONEW	2015-05-07	15:39:30	40	3	NOSTIM	56	8	0
ISONEW	2015-05-07	15:39:30	57	4	P120	57	1	173
ISONEW	2015-05-07	15:39:30	58	3	P120	57	2	400
ISONEW	2015-05-07	15:39:30	51	5	P120	57	3	40
ISONEW	2015-05-07	15:39:30	999	999	P120	57	4	41
ISONEW	2015-05-07	15:39:30	53	2	P120	57	5	44
ISONEW	2015-05-07	15:39:30	54	1	P120	57	6	63
ISONEW	2015-05-07	15:39:30	39	4	P120	57	7	17
ISONEW	2015-05-07	15:39:30	40	3	P120	57	8	495
ISONEW	2015-05-07	15:39:30	57	4	NOSTIM	58	1	0
ISONEW	2015-05-07	15:39:30	58	3	NOSTIM	58	2	0
ISONEW	2015-05-07	15:39:30	51	5	NOSTIM	58	3	5
ISONEW	2015-05-07	15:39:30	999	999	NOSTIM	58	4	0
ISONEW	2015-05-07	15:39:30	53	2	NOSTIM	58	5	0
ISONEW	2015-05-07	15:39:30	54	1	NOSTIM	58	6	0
ISONEW	2015-05-07	15:39:30	39	4	NOSTIM	58	7	0
ISONEW	2015-05-07	15:39:30	40	3	NOSTIM	58	8	0
ISONEW	2015-05-07	15:39:30	57	4	PP6P120	59	1	47
ISONEW	2015-05-07	15:39:30	58	3	PP6P120	59	2	29
ISONEW	2015-05-07	15:39:30	51	5	PP6P120	59	3	313
ISONEW	2015-05-07	15:39:30	999	999	PP6P120	59	4	21
ISONEW	2015-05-07	15:39:30	53	2	PP6P120	59	5	7
ISONEW	2015-05-07	15:39:30	54	1	PP6P120	59	6	39
ISONEW	2015-05-07	15:39:30	39	4	PP6P120	59	7	54
ISONEW	2015-05-07	15:39:30	40	3	PP6P120	59	8	336
ISONEW	2015-05-07	15:39:30	57	4	NOSTIM	60	1	0
ISONEW	2015-05-07	15:39:30	58	3	NOSTIM	60	2	0
ISONEW	2015-05-07	15:39:30	51	5	NOSTIM	60	3	0
ISONEW	2015-05-07	15:39:30	999	999	NOSTIM	60	4	0
ISONEW	2015-05-07	15:39:30	53	2	NOSTIM	60	5	0
ISONEW	2015-05-07	15:39:30	54	1	NOSTIM	60	6	0
ISONEW	2015-05-07	15:39:30	39	4	NOSTIM	60	7	0
ISONEW	2015-05-07	15:39:30	40	3	NOSTIM	60	8	0
ISONEW	2015-05-07	15:39:30	57	4	PP6P120	61	1	120
ISONEW	2015-05-07	15:39:30	58	3	PP6P120	61	2	18
ISONEW	2015-05-07	15:39:30	51	5	PP6P120	61	3	142
ISONEW	2015-05-07	15:39:30	999	999	PP6P120	61	4	11
ISONEW	2015-05-07	15:39:30	53	2	PP6P120	61	5	20
ISONEW	2015-05-07	15:39:30	54	1	PP6P120	61	6	3
ISONEW	2015-05-07	15:39:30	39	4	PP6P120	61	7	28
ISONEW	2015-05-07	15:39:30	40	3	PP6P120	61	8	210
ISONEW	2015-05-07	15:39:30	57	4	NOSTIM	62	1	0
ISONEW	2015-05-07	15:39:30	58	3	NOSTIM	62	2	0
ISONEW	2015-05-07	15:39:30	51	5	NOSTIM	62	3	0
ISONEW	2015-05-07	15:39:30	999	999	NOSTIM	62	4	0
ISONEW	2015-05-07	15:39:30	53	2	NOSTIM	62	5	0
ISONEW	2015-05-07	15:39:30	54	1	NOSTIM	62	6	0
ISONEW	2015-05-07	15:39:30	39	4	NOSTIM	62	7	0
ISONEW	2015-05-07	15:39:30	40	3	NOSTIM	62	8	0
ISONEW	2015-05-07	15:39:30	57	4	PP12P120	63	1	41
ISONEW	2015-05-07	15:39:30	58	3	PP12P120	63	2	44
ISONEW	2015-05-07	15:39:30	51	5	PP12P120	63	3	237
ISONEW	2015-05-07	15:39:30	999	999	PP12P120	63	4	6
ISONEW	2015-05-07	15:39:30	53	2	PP12P120	63	5	5
ISONEW	2015-05-07	15:39:30	54	1	PP12P120	63	6	6
ISONEW	2015-05-07	15:39:30	39	4	PP12P120	63	7	10
ISONEW	2015-05-07	15:39:30	40	3	PP12P120	63	8	109
ISONEW	2015-05-07	15:39:30	57	4	NOSTIM	64	1	0
ISONEW	2015-05-07	15:39:30	58	3	NOSTIM	64	2	0
ISONEW	2015-05-07	15:39:30	51	5	NOSTIM	64	3	0
ISONEW	2015-05-07	15:39:30	999	999	NOSTIM	64	4	0
ISONEW	2015-05-07	15:39:30	53	2	NOSTIM	64	5	0
ISONEW	2015-05-07	15:39:30	54	1	NOSTIM	64	6	0
ISONEW	2015-05-07	15:39:30	39	4	NOSTIM	64	7	0
ISONEW	2015-05-07	15:39:30	40	3	NOSTIM	64	8	0
ISONEW	2015-05-07	15:39:30	57	4	PP3P120	65	1	116
ISONEW	2015-05-07	15:39:30	58	3	PP3P120	65	2	198
ISONEW	2015-05-07	15:39:30	51	5	PP3P120	65	3	157
ISONEW	2015-05-07	15:39:30	999	999	PP3P120	65	4	37
ISONEW	2015-05-07	15:39:30	53	2	PP3P120	65	5	23
ISONEW	2015-05-07	15:39:30	54	1	PP3P120	65	6	11
ISONEW	2015-05-07	15:39:30	39	4	PP3P120	65	7	31
ISONEW	2015-05-07	15:39:30	40	3	PP3P120	65	8	475
ISONEW	2015-05-07	15:39:30	57	4	NOSTIM	66	1	0
ISONEW	2015-05-07	15:39:30	58	3	NOSTIM	66	2	0
ISONEW	2015-05-07	15:39:30	51	5	NOSTIM	66	3	0
ISONEW	2015-05-07	15:39:30	999	999	NOSTIM	66	4	0
ISONEW	2015-05-07	15:39:30	53	2	NOSTIM	66	5	0
ISONEW	2015-05-07	15:39:30	54	1	NOSTIM	66	6	0
ISONEW	2015-05-07	15:39:30	39	4	NOSTIM	66	7	0
ISONEW	2015-05-07	15:39:30	40	3	NOSTIM	66	8	0
ISONEW	2015-05-07	15:39:30	57	4	P120	67	1	94
ISONEW	2015-05-07	15:39:30	58	3	P120	67	2	813
ISONEW	2015-05-07	15:39:30	51	5	P120	67	3	82
ISONEW	2015-05-07	15:39:30	999	999	P120	67	4	38
ISONEW	2015-05-07	15:39:30	53	2	P120	67	5	75
ISONEW	2015-05-07	15:39:30	54	1	P120	67	6	233
ISONEW	2015-05-07	15:39:30	39	4	P120	67	7	57
ISONEW	2015-05-07	15:39:30	40	3	P120	67	8	510
ISONEW	2015-05-07	15:39:30	57	4	NOSTIM	68	1	0
ISONEW	2015-05-07	15:39:30	58	3	NOSTIM	68	2	0
ISONEW	2015-05-07	15:39:30	51	5	NOSTIM	68	3	8
ISONEW	2015-05-07	15:39:30	999	999	NOSTIM	68	4	0
ISONEW	2015-05-07	15:39:30	53	2	NOSTIM	68	5	0
ISONEW	2015-05-07	15:39:30	54	1	NOSTIM	68	6	0
ISONEW	2015-05-07	15:39:30	39	4	NOSTIM	68	7	0
ISONEW	2015-05-07	15:39:30	40	3	NOSTIM	68	8	0
ISONEW	2015-05-07	15:39:30	57	4	PP6P120	69	1	103
ISONEW	2015-05-07	15:39:30	58	3	PP6P120	69	2	54
ISONEW	2015-05-07	15:39:30	51	5	PP6P120	69	3	143
ISONEW	2015-05-07	15:39:30	999	999	PP6P120	69	4	27
ISONEW	2015-05-07	15:39:30	53	2	PP6P120	69	5	12
ISONEW	2015-05-07	15:39:30	54	1	PP6P120	69	6	24
ISONEW	2015-05-07	15:39:30	39	4	PP6P120	69	7	35
ISONEW	2015-05-07	15:39:30	40	3	PP6P120	69	8	406
ISONEW	2015-05-07	15:39:30	57	4	NOSTIM	70	1	0
ISONEW	2015-05-07	15:39:30	58	3	NOSTIM	70	2	0
ISONEW	2015-05-07	15:39:30	51	5	NOSTIM	70	3	9
ISONEW	2015-05-07	15:39:30	999	999	NOSTIM	70	4	0
ISONEW	2015-05-07	15:39:30	53	2	NOSTIM	70	5	0
ISONEW	2015-05-07	15:39:30	54	1	NOSTIM	70	6	0
ISONEW	2015-05-07	15:39:30	39	4	NOSTIM	70	7	0
ISONEW	2015-05-07	15:39:30	40	3	NOSTIM	70	8	0
ISONEW	2015-05-07	15:39:30	57	4	PP3P120	71	1	111
ISONEW	2015-05-07	15:39:30	58	3	PP3P120	71	2	189
ISONEW	2015-05-07	15:39:30	51	5	PP3P120	71	3	149
ISONEW	2015-05-07	15:39:30	999	999	PP3P120	71	4	19
ISONEW	2015-05-07	15:39:30	53	2	PP3P120	71	5	75
ISONEW	2015-05-07	15:39:30	54	1	PP3P120	71	6	362
ISONEW	2015-05-07	15:39:30	39	4	PP3P120	71	7	64
ISONEW	2015-05-07	15:39:30	40	3	PP3P120	71	8	252
ISONEW	2015-05-07	15:39:30	57	4	NOSTIM	72	1	0
ISONEW	2015-05-07	15:39:30	58	3	NOSTIM	72	2	0
ISONEW	2015-05-07	15:39:30	51	5	NOSTIM	72	3	0
ISONEW	2015-05-07	15:39:30	999	999	NOSTIM	72	4	0
ISONEW	2015-05-07	15:39:30	53	2	NOSTIM	72	5	0
ISONEW	2015-05-07	15:39:30	54	1	NOSTIM	72	6	0
ISONEW	2015-05-07	15:39:30	39	4	NOSTIM	72	7	0
ISONEW	2015-05-07	15:39:30	40	3	NOSTIM	72	8	0
ISONEW	2015-05-07	15:39:30	57	4	PP6P120	73	1	93
ISONEW	2015-05-07	15:39:30	58	3	PP6P120	73	2	21
ISONEW	2015-05-07	15:39:30	51	5	PP6P120	73	3	253
ISONEW	2015-05-07	15:39:30	999	999	PP6P120	73	4	24
ISONEW	2015-05-07	15:39:30	53	2	PP6P120	73	5	19
ISONEW	2015-05-07	15:39:30	54	1	PP6P120	73	6	84
ISONEW	2015-05-07	15:39:30	39	4	PP6P120	73	7	28
ISONEW	2015-05-07	15:39:30	40	3	PP6P120	73	8	318
ISONEW	2015-05-07	15:39:30	57	4	NOSTIM	74	1	0
ISONEW	2015-05-07	15:39:30	58	3	NOSTIM	74	2	0
ISONEW	2015-05-07	15:39:30	51	5	NOSTIM	74	3	0
ISONEW	2015-05-07	15:39:30	999	999	NOSTIM	74	4	0
ISONEW	2015-05-07	15:39:30	53	2	NOSTIM	74	5	0
ISONEW	2015-05-07	15:39:30	54	1	NOSTIM	74	6	0
ISONEW	2015-05-07	15:39:30	39	4	NOSTIM	74	7	0
ISONEW	2015-05-07	15:39:30	40	3	NOSTIM	74	8	0
ISONEW	2015-05-07	15:39:30	57	4	P120	75	1	423
ISONEW	2015-05-07	15:39:30	58	3	P120	75	2	166
ISONEW	2015-05-07	15:39:30	51	5	P120	75	3	157
ISONEW	2015-05-07	15:39:30	999	999	P120	75	4	45
ISONEW	2015-05-07	15:39:30	53	2	P120	75	5	39
ISONEW	2015-05-07	15:39:30	54	1	P120	75	6	132
ISONEW	2015-05-07	15:39:30	39	4	P120	75	7	63
ISONEW	2015-05-07	15:39:30	40	3	P120	75	8	499
ISONEW	2015-05-07	15:39:30	57	4	NOSTIM	76	1	0
ISONEW	2015-05-07	15:39:30	58	3	NOSTIM	76	2	0
ISONEW	2015-05-07	15:39:30	51	5	NOSTIM	76	3	1
ISONEW	2015-05-07	15:39:30	999	999	NOSTIM	76	4	0
ISONEW	2015-05-07	15:39:30	53	2	NOSTIM	76	5	0
ISONEW	2015-05-07	15:39:30	54	1	NOSTIM	76	6	0
ISONEW	2015-05-07	15:39:30	39	4	NOSTIM	76	7	0
ISONEW	2015-05-07	15:39:30	40	3	NOSTIM	76	8	0
ISONEW	2015-05-07	15:39:30	57	4	PP12P120	77	1	25
ISONEW	2015-05-07	15:39:30	58	3	PP12P120	77	2	24
ISONEW	2015-05-07	15:39:30	51	5	PP12P120	77	3	251
ISONEW	2015-05-07	15:39:30	999	999	PP12P120	77	4	12
ISONEW	2015-05-07	15:39:30	53	2	PP12P120	77	5	1
ISONEW	2015-05-07	15:39:30	54	1	PP12P120	77	6	8
ISONEW	2015-05-07	15:39:30	39	4	PP12P120	77	7	17
ISONEW	2015-05-07	15:39:30	40	3	PP12P120	77	8	254
ISONEW	2015-05-07	15:39:30	57	4	NOSTIM	78	1	0
ISONEW	2015-05-07	15:39:30	58	3	NOSTIM	78	2	0
ISONEW	2015-05-07	15:39:30	51	5	NOSTIM	78	3	0
ISONEW	2015-05-07	15:39:30	999	999	NOSTIM	78	4	0
ISONEW	2015-05-07	15:39:30	53	2	NOSTIM	78	5	0
ISONEW	2015-05-07	15:39:30	54	1	NOSTIM	78	6	0
ISONEW	2015-05-07	15:39:30	39	4	NOSTIM	78	7	0
ISONEW	2015-05-07	15:39:30	40	3	NOSTIM	78	8	31
ISONEW	2015-05-07	15:39:30	57	4	P120	79	1	64
ISONEW	2015-05-07	15:39:30	58	3	P120	79	2	282
ISONEW	2015-05-07	15:39:30	51	5	P120	79	3	179
ISONEW	2015-05-07	15:39:30	999	999	P120	79	4	1
ISONEW	2015-05-07	15:39:30	53	2	P120	79	5	96
ISONEW	2015-05-07	15:39:30	54	1	P120	79	6	154
ISONEW	2015-05-07	15:39:30	39	4	P120	79	7	62
ISONEW	2015-05-07	15:39:30	40	3	P120	79	8	48
ISONEW	2015-05-07	15:39:30	57	4	NOSTIM	80	1	0
ISONEW	2015-05-07	15:39:30	58	3	NOSTIM	80	2	0
ISONEW	2015-05-07	15:39:30	51	5	NOSTIM	80	3	44
ISONEW	2015-05-07	15:39:30	999	999	NOSTIM	80	4	0
ISONEW	2015-05-07	15:39:30	53	2	NOSTIM	80	5	0
ISONEW	2015-05-07	15:39:30	54	1	NOSTIM	80	6	0
ISONEW	2015-05-07	15:39:30	39	4	NOSTIM	80	7	0
ISONEW	2015-05-07	15:39:30	40	3	NOSTIM	80	8	0
ISONEW	2015-05-07	15:39:30	57	4	PP3P120	81	1	54
ISONEW	2015-05-07	15:39:30	58	3	PP3P120	81	2	176
ISONEW	2015-05-07	15:39:30	51	5	PP3P120	81	3	47
ISONEW	2015-05-07	15:39:30	999	999	PP3P120	81	4	39
ISONEW	2015-05-07	15:39:30	53	2	PP3P120	81	5	1
ISONEW	2015-05-07	15:39:30	54	1	PP3P120	81	6	49
ISONEW	2015-05-07	15:39:30	39	4	PP3P120	81	7	52
ISONEW	2015-05-07	15:39:30	40	3	PP3P120	81	8	433
ISONEW	2015-05-07	15:39:30	57	4	NOSTIM	82	1	0
ISONEW	2015-05-07	15:39:30	58	3	NOSTIM	82	2	0
ISONEW	2015-05-07	15:39:30	51	5	NOSTIM	82	3	0
ISONEW	2015-05-07	15:39:30	999	999	NOSTIM	82	4	0
ISONEW	2015-05-07	15:39:30	53	2	NOSTIM	82	5	0
ISONEW	2015-05-07	15:39:30	54	1	NOSTIM	82	6	0
ISONEW	2015-05-07	15:39:30	39	4	NOSTIM	82	7	0
ISONEW	2015-05-07	15:39:30	40	3	NOSTIM	82	8	0
ISONEW	2015-05-07	15:39:30	57	4	PP12P120	83	1	23
ISONEW	2015-05-07	15:39:30	58	3	PP12P120	83	2	59
ISONEW	2015-05-07	15:39:30	51	5	PP12P120	83	3	179
ISONEW	2015-05-07	15:39:30	999	999	PP12P120	83	4	13
ISONEW	2015-05-07	15:39:30	53	2	PP12P120	83	5	2
ISONEW	2015-05-07	15:39:30	54	1	PP12P120	83	6	8
ISONEW	2015-05-07	15:39:30	39	4	PP12P120	83	7	16
ISONEW	2015-05-07	15:39:30	40	3	PP12P120	83	8	210
ISONEW	2015-05-07	15:39:30	57	4	NOSTIM	84	1	0
ISONEW	2015-05-07	15:39:30	58	3	NOSTIM	84	2	0
ISONEW	2015-05-07	15:39:30	51	5	NOSTIM	84	3	0
ISONEW	2015-05-07	15:39:30	999	999	NOSTIM	84	4	0
ISONEW	2015-05-07	15:39:30	53	2	NOSTIM	84	5	0
ISONEW	2015-05-07	15:39:30	54	1	NOSTIM	84	6	0
ISONEW	2015-05-07	15:39:30	39	4	NOSTIM	84	7	0
ISONEW	2015-05-07	15:39:30	40	3	NOSTIM	84	8	0
ISONEW	2015-05-07	15:39:30	57	4	PP3P120	85	1	173
ISONEW	2015-05-07	15:39:30	58	3	PP3P120	85	2	137
ISONEW	2015-05-07	15:39:30	51	5	PP3P120	85	3	187
ISONEW	2015-05-07	15:39:30	999	999	PP3P120	85	4	45
ISONEW	2015-05-07	15:39:30	53	2	PP3P120	85	5	20
ISONEW	2015-05-07	15:39:30	54	1	PP3P120	85	6	102
ISONEW	2015-05-07	15:39:30	39	4	PP3P120	85	7	87
ISONEW	2015-05-07	15:39:30	40	3	PP3P120	85	8	423
ISONEW	2015-05-07	15:39:30	57	4	NOSTIM	86	1	0
ISONEW	2015-05-07	15:39:30	58	3	NOSTIM	86	2	0
ISONEW	2015-05-07	15:39:30	51	5	NOSTIM	86	3	0
ISONEW	2015-05-07	15:39:30	999	999	NOSTIM	86	4	0
ISONEW	2015-05-07	15:39:30	53	2	NOSTIM	86	5	0
ISONEW	2015-05-07	15:39:30	54	1	NOSTIM	86	6	0
ISONEW	2015-05-07	15:39:30	39	4	NOSTIM	86	7	0
ISONEW	2015-05-07	15:39:30	40	3	NOSTIM	86	8	0
ISONEW	2015-05-07	15:39:30	57	4	PP12P120	87	1	21
ISONEW	2015-05-07	15:39:30	58	3	PP12P120	87	2	89
ISONEW	2015-05-07	15:39:30	51	5	PP12P120	87	3	197
ISONEW	2015-05-07	15:39:30	999	999	PP12P120	87	4	11
ISONEW	2015-05-07	15:39:30	53	2	PP12P120	87	5	3
ISONEW	2015-05-07	15:39:30	54	1	PP12P120	87	6	46
ISONEW	2015-05-07	15:39:30	39	4	PP12P120	87	7	7
ISONEW	2015-05-07	15:39:30	40	3	PP12P120	87	8	194
ISONEW	2015-05-07	15:39:30	57	4	NOSTIM	88	1	0
ISONEW	2015-05-07	15:39:30	58	3	NOSTIM	88	2	0
ISONEW	2015-05-07	15:39:30	51	5	NOSTIM	88	3	0
ISONEW	2015-05-07	15:39:30	999	999	NOSTIM	88	4	0
ISONEW	2015-05-07	15:39:30	53	2	NOSTIM	88	5	0
ISONEW	2015-05-07	15:39:30	54	1	NOSTIM	88	6	0
ISONEW	2015-05-07	15:39:30	39	4	NOSTIM	88	7	0
ISONEW	2015-05-07	15:39:30	40	3	NOSTIM	88	8	0
ISONEW	2015-05-07	15:39:30	57	4	PP6P120	89	1	23
ISONEW	2015-05-07	15:39:30	58	3	PP6P120	89	2	82
ISONEW	2015-05-07	15:39:30	51	5	PP6P120	89	3	404
ISONEW	2015-05-07	15:39:30	999	999	PP6P120	89	4	37
ISONEW	2015-05-07	15:39:30	53	2	PP6P120	89	5	12
ISONEW	2015-05-07	15:39:30	54	1	PP6P120	89	6	28
ISONEW	2015-05-07	15:39:30	39	4	PP6P120	89	7	41
ISONEW	2015-05-07	15:39:30	40	3	PP6P120	89	8	426
ISONEW	2015-05-07	15:39:30	57	4	NOSTIM	90	1	0
ISONEW	2015-05-07	15:39:30	58	3	NOSTIM	90	2	0
ISONEW	2015-05-07	15:39:30	51	5	NOSTIM	90	3	0
ISONEW	2015-05-07	15:39:30	999	999	NOSTIM	90	4	0
ISONEW	2015-05-07	15:39:30	53	2	NOSTIM	90	5	0
ISONEW	2015-05-07	15:39:30	54	1	NOSTIM	90	6	0
ISONEW	2015-05-07	15:39:30	39	4	NOSTIM	90	7	0
ISONEW	2015-05-07	15:39:30	40	3	NOSTIM	90	8	0
ISONEW	2015-05-07	15:39:30	57	4	P120	91	1	189
ISONEW	2015-05-07	15:39:30	58	3	P120	91	2	196
ISONEW	2015-05-07	15:39:30	51	5	P120	91	3	379
ISONEW	2015-05-07	15:39:30	999	999	P120	91	4	44
ISONEW	2015-05-07	15:39:30	53	2	P120	91	5	362
ISONEW	2015-05-07	15:39:30	54	1	P120	91	6	235
ISONEW	2015-05-07	15:39:30	39	4	P120	91	7	43
ISONEW	2015-05-07	15:39:30	40	3	P120	91	8	463
ISONEW	2015-05-07	15:39:30	57	4	NOSTIM	92	1	0
ISONEW	2015-05-07	15:39:30	58	3	NOSTIM	92	2	0
ISONEW	2015-05-07	15:39:30	51	5	NOSTIM	92	3	0
ISONEW	2015-05-07	15:39:30	999	999	NOSTIM	92	4	0
ISONEW	2015-05-07	15:39:30	53	2	NOSTIM	92	5	0
ISONEW	2015-05-07	15:39:30	54	1	NOSTIM	92	6	7
ISONEW	2015-05-07	15:39:30	39	4	NOSTIM	92	7	0
ISONEW	2015-05-07	15:39:30	40	3	NOSTIM	92	8	0
ISONEW	2015-05-07	15:39:30	57	4	PP3P120	93	1	234
ISONEW	2015-05-07	15:39:30	58	3	PP3P120	93	2	97
ISONEW	2015-05-07	15:39:30	51	5	PP3P120	93	3	269
ISONEW	2015-05-07	15:39:30	999	999	PP3P120	93	4	59
ISONEW	2015-05-07	15:39:30	53	2	PP3P120	93	5	73
ISONEW	2015-05-07	15:39:30	54	1	PP3P120	93	6	195
ISONEW	2015-05-07	15:39:30	39	4	PP3P120	93	7	149
ISONEW	2015-05-07	15:39:30	40	3	PP3P120	93	8	577
ISONEW	2015-05-07	15:39:30	57	4	NOSTIM	94	1	0
ISONEW	2015-05-07	15:39:30	58	3	NOSTIM	94	2	0
ISONEW	2015-05-07	15:39:30	51	5	NOSTIM	94	3	0
ISONEW	2015-05-07	15:39:30	999	999	NOSTIM	94	4	0
ISONEW	2015-05-07	15:39:30	53	2	NOSTIM	94	5	0
ISONEW	2015-05-07	15:39:30	54	1	NOSTIM	94	6	0
ISONEW	2015-05-07	15:39:30	39	4	NOSTIM	94	7	0
ISONEW	2015-05-07	15:39:30	40	3	NOSTIM	94	8	0
ISONEW	2015-05-07	15:39:30	57	4	PP12P120	95	1	26
ISONEW	2015-05-07	15:39:30	58	3	PP12P120	95	2	57
ISONEW	2015-05-07	15:39:30	51	5	PP12P120	95	3	189
ISONEW	2015-05-07	15:39:30	999	999	PP12P120	95	4	17
ISONEW	2015-05-07	15:39:30	53	2	PP12P120	95	5	84
ISONEW	2015-05-07	15:39:30	54	1	PP12P120	95	6	3
ISONEW	2015-05-07	15:39:30	39	4	PP12P120	95	7	41
ISONEW	2015-05-07	15:39:30	40	3	PP12P120	95	8	216
ISONEW	2015-05-07	15:39:30	57	4	NOSTIM	96	1	0
ISONEW	2015-05-07	15:39:30	58	3	NOSTIM	96	2	0
ISONEW	2015-05-07	15:39:30	51	5	NOSTIM	96	3	0
ISONEW	2015-05-07	15:39:30	999	999	NOSTIM	96	4	0
ISONEW	2015-05-07	15:39:30	53	2	NOSTIM	96	5	0
ISONEW	2015-05-07	15:39:30	54	1	NOSTIM	96	6	0
ISONEW	2015-05-07	15:39:30	39	4	NOSTIM	96	7	0
ISONEW	2015-05-07	15:39:30	40	3	NOSTIM	96	8	0
ISONEW	2015-05-07	15:39:30	57	4	PP6P120	97	1	35
ISONEW	2015-05-07	15:39:30	58	3	PP6P120	97	2	101
ISONEW	2015-05-07	15:39:30	51	5	PP6P120	97	3	287
ISONEW	2015-05-07	15:39:30	999	999	PP6P120	97	4	34
ISONEW	2015-05-07	15:39:30	53	2	PP6P120	97	5	43
ISONEW	2015-05-07	15:39:30	54	1	PP6P120	97	6	59
ISONEW	2015-05-07	15:39:30	39	4	PP6P120	97	7	53
ISONEW	2015-05-07	15:39:30	40	3	PP6P120	97	8	411
ISONEW	2015-05-07	15:39:30	57	4	NOSTIM	98	1	0
ISONEW	2015-05-07	15:39:30	58	3	NOSTIM	98	2	0
ISONEW	2015-05-07	15:39:30	51	5	NOSTIM	98	3	1
ISONEW	2015-05-07	15:39:30	999	999	NOSTIM	98	4	0
ISONEW	2015-05-07	15:39:30	53	2	NOSTIM	98	5	0
ISONEW	2015-05-07	15:39:30	54	1	NOSTIM	98	6	0
ISONEW	2015-05-07	15:39:30	39	4	NOSTIM	98	7	0
ISONEW	2015-05-07	15:39:30	40	3	NOSTIM	98	8	0
ISONEW	2015-05-07	15:39:30	57	4	P120	99	1	140
ISONEW	2015-05-07	15:39:30	58	3	P120	99	2	476
ISONEW	2015-05-07	15:39:30	51	5	P120	99	3	272
ISONEW	2015-05-07	15:39:30	999	999	P120	99	4	40
ISONEW	2015-05-07	15:39:30	53	2	P120	99	5	46
ISONEW	2015-05-07	15:39:30	54	1	P120	99	6	148
ISONEW	2015-05-07	15:39:30	39	4	P120	99	7	179
ISONEW	2015-05-07	15:39:30	40	3	P120	99	8	538
ISONEW	2015-05-07	15:39:30	57	4	NOSTIM	100	1	0
ISONEW	2015-05-07	15:39:30	58	3	NOSTIM	100	2	0
ISONEW	2015-05-07	15:39:30	51	5	NOSTIM	100	3	11
ISONEW	2015-05-07	15:39:30	999	999	NOSTIM	100	4	0
ISONEW	2015-05-07	15:39:30	53	2	NOSTIM	100	5	0
ISONEW	2015-05-07	15:39:30	54	1	NOSTIM	100	6	0
ISONEW	2015-05-07	15:39:30	39	4	NOSTIM	100	7	0
ISONEW	2015-05-07	15:39:30	40	3	NOSTIM	100	8	0
ISONEW	2015-05-07	15:39:30	57	4	PP3P120	101	1	20
ISONEW	2015-05-07	15:39:30	58	3	PP3P120	101	2	92
ISONEW	2015-05-07	15:39:30	51	5	PP3P120	101	3	133
ISONEW	2015-05-07	15:39:30	999	999	PP3P120	101	4	37
ISONEW	2015-05-07	15:39:30	53	2	PP3P120	101	5	18
ISONEW	2015-05-07	15:39:30	54	1	PP3P120	101	6	56
ISONEW	2015-05-07	15:39:30	39	4	PP3P120	101	7	60
ISONEW	2015-05-07	15:39:30	40	3	PP3P120	101	8	527
ISONEW	2015-05-07	15:39:30	57	4	NOSTIM	102	1	0
ISONEW	2015-05-07	15:39:30	58	3	NOSTIM	102	2	0
ISONEW	2015-05-07	15:39:30	51	5	NOSTIM	102	3	0
ISONEW	2015-05-07	15:39:30	999	999	NOSTIM	102	4	0
ISONEW	2015-05-07	15:39:30	53	2	NOSTIM	102	5	0
ISONEW	2015-05-07	15:39:30	54	1	NOSTIM	102	6	0
ISONEW	2015-05-07	15:39:30	39	4	NOSTIM	102	7	0
ISONEW	2015-05-07	15:39:30	40	3	NOSTIM	102	8	0
ISONEW	2015-05-07	15:39:30	57	4	PP12P120	103	1	13
ISONEW	2015-05-07	15:39:30	58	3	PP12P120	103	2	50
ISONEW	2015-05-07	15:39:30	51	5	PP12P120	103	3	125
ISONEW	2015-05-07	15:39:30	999	999	PP12P120	103	4	17
ISONEW	2015-05-07	15:39:30	53	2	PP12P120	103	5	26
ISONEW	2015-05-07	15:39:30	54	1	PP12P120	103	6	10
ISONEW	2015-05-07	15:39:30	39	4	PP12P120	103	7	19
ISONEW	2015-05-07	15:39:30	40	3	PP12P120	103	8	231
ISONEW	2015-05-07	15:39:30	57	4	NOSTIM	104	1	0
ISONEW	2015-05-07	15:39:30	58	3	NOSTIM	104	2	0
ISONEW	2015-05-07	15:39:30	51	5	NOSTIM	104	3	0
ISONEW	2015-05-07	15:39:30	999	999	NOSTIM	104	4	0
ISONEW	2015-05-07	15:39:30	53	2	NOSTIM	104	5	0
ISONEW	2015-05-07	15:39:30	54	1	NOSTIM	104	6	0
ISONEW	2015-05-07	15:39:30	39	4	NOSTIM	104	7	0
ISONEW	2015-05-07	15:39:30	40	3	NOSTIM	104	8	0
ISONEW	2015-05-07	15:39:30	57	4	P120	105	1	52
ISONEW	2015-05-07	15:39:30	58	3	P120	105	2	209
ISONEW	2015-05-07	15:39:30	51	5	P120	105	3	130
ISONEW	2015-05-07	15:39:30	999	999	P120	105	4	33
ISONEW	2015-05-07	15:39:30	53	2	P120	105	5	130
ISONEW	2015-05-07	15:39:30	54	1	P120	105	6	128
ISONEW	2015-05-07	15:39:30	39	4	P120	105	7	181
ISONEW	2015-05-07	15:39:30	40	3	P120	105	8	404
ISONEW	2015-05-07	15:39:30	57	4	NOSTIM	106	1	0
ISONEW	2015-05-07	15:39:30	58	3	NOSTIM	106	2	0
ISONEW	2015-05-07	15:39:30	51	5	NOSTIM	106	3	0
ISONEW	2015-05-07	15:39:30	999	999	NOSTIM	106	4	0
ISONEW	2015-05-07	15:39:30	53	2	NOSTIM	106	5	0
ISONEW	2015-05-07	15:39:30	54	1	NOSTIM	106	6	0
ISONEW	2015-05-07	15:39:30	39	4	NOSTIM	106	7	0
ISONEW	2015-05-07	15:39:30	40	3	NOSTIM	106	8	0
ISONEW	2015-05-07	15:39:30	57	4	PP6P120	107	1	49
ISONEW	2015-05-07	15:39:30	58	3	PP6P120	107	2	118
ISONEW	2015-05-07	15:39:30	51	5	PP6P120	107	3	153
ISONEW	2015-05-07	15:39:30	999	999	PP6P120	107	4	28
ISONEW	2015-05-07	15:39:30	53	2	PP6P120	107	5	65
ISONEW	2015-05-07	15:39:30	54	1	PP6P120	107	6	256
ISONEW	2015-05-07	15:39:30	39	4	PP6P120	107	7	26
ISONEW	2015-05-07	15:39:30	40	3	PP6P120	107	8	324
ISONEW	2015-05-07	15:39:30	57	4	NOSTIM	108	1	0
ISONEW	2015-05-07	15:39:30	58	3	NOSTIM	108	2	0
ISONEW	2015-05-07	15:39:30	51	5	NOSTIM	108	3	3
ISONEW	2015-05-07	15:39:30	999	999	NOSTIM	108	4	0
ISONEW	2015-05-07	15:39:30	53	2	NOSTIM	108	5	0
ISONEW	2015-05-07	15:39:30	54	1	NOSTIM	108	6	0
ISONEW	2015-05-07	15:39:30	39	4	NOSTIM	108	7	0
ISONEW	2015-05-07	15:39:30	40	3	NOSTIM	108	8	13
ISONEW	2015-05-07	15:39:30	57	4	P120	109	1	126
ISONEW	2015-05-07	15:39:30	58	3	P120	109	2	109
ISONEW	2015-05-07	15:39:30	51	5	P120	109	3	163
ISONEW	2015-05-07	15:39:30	999	999	P120	109	4	37
ISONEW	2015-05-07	15:39:30	53	2	P120	109	5	83
ISONEW	2015-05-07	15:39:30	54	1	P120	109	6	719
ISONEW	2015-05-07	15:39:30	39	4	P120	109	7	78
ISONEW	2015-05-07	15:39:30	40	3	P120	109	8	380
ISONEW	2015-05-07	15:39:30	57	4	NOSTIM	110	1	0
ISONEW	2015-05-07	15:39:30	58	3	NOSTIM	110	2	0
ISONEW	2015-05-07	15:39:30	51	5	NOSTIM	110	3	6
ISONEW	2015-05-07	15:39:30	999	999	NOSTIM	110	4	0
ISONEW	2015-05-07	15:39:30	53	2	NOSTIM	110	5	0
ISONEW	2015-05-07	15:39:30	54	1	NOSTIM	110	6	0
ISONEW	2015-05-07	15:39:30	39	4	NOSTIM	110	7	0
ISONEW	2015-05-07	15:39:30	40	3	NOSTIM	110	8	24
ISONEW	2015-05-07	15:39:30	57	4	P120	111	1	192
ISONEW	2015-05-07	15:39:30	58	3	P120	111	2	168
ISONEW	2015-05-07	15:39:30	51	5	P120	111	3	201
ISONEW	2015-05-07	15:39:30	999	999	P120	111	4	67
ISONEW	2015-05-07	15:39:30	53	2	P120	111	5	60
ISONEW	2015-05-07	15:39:30	54	1	P120	111	6	113
ISONEW	2015-05-07	15:39:30	39	4	P120	111	7	29
ISONEW	2015-05-07	15:39:30	40	3	P120	111	8	792
ISONEW	2015-05-07	15:39:30	57	4	NOSTIM	112	1	0
ISONEW	2015-05-07	15:39:30	58	3	NOSTIM	112	2	0
ISONEW	2015-05-07	15:39:30	51	5	NOSTIM	112	3	0
ISONEW	2015-05-07	15:39:30	999	999	NOSTIM	112	4	0
ISONEW	2015-05-07	15:39:30	53	2	NOSTIM	112	5	0
ISONEW	2015-05-07	15:39:30	54	1	NOSTIM	112	6	10
ISONEW	2015-05-07	15:39:30	39	4	NOSTIM	112	7	0
ISONEW	2015-05-07	15:39:30	40	3	NOSTIM	112	8	0
ISONEW	2015-05-07	15:39:30	57	4	P120	113	1	50
ISONEW	2015-05-07	15:39:30	58	3	P120	113	2	959
ISONEW	2015-05-07	15:39:30	51	5	P120	113	3	138
ISONEW	2015-05-07	15:39:30	999	999	P120	113	4	48
ISONEW	2015-05-07	15:39:30	53	2	P120	113	5	54
ISONEW	2015-05-07	15:39:30	54	1	P120	113	6	462
ISONEW	2015-05-07	15:39:30	39	4	P120	113	7	26
ISONEW	2015-05-07	15:39:30	40	3	P120	113	8	480
ISONEW	2015-05-07	15:39:30	57	4	NOSTIM	114	1	0
ISONEW	2015-05-07	15:39:30	58	3	NOSTIM	114	2	0
ISONEW	2015-05-07	15:39:30	51	5	NOSTIM	114	3	1
ISONEW	2015-05-07	15:39:30	999	999	NOSTIM	114	4	0
ISONEW	2015-05-07	15:39:30	53	2	NOSTIM	114	5	0
ISONEW	2015-05-07	15:39:30	54	1	NOSTIM	114	6	0
ISONEW	2015-05-07	15:39:30	39	4	NOSTIM	114	7	0
ISONEW	2015-05-07	15:39:30	40	3	NOSTIM	114	8	0
ISONEW	2015-05-07	15:39:30	57	4	P120	115	1	155
ISONEW	2015-05-07	15:39:30	58	3	P120	115	2	350
ISONEW	2015-05-07	15:39:30	51	5	P120	115	3	139
ISONEW	2015-05-07	15:39:30	999	999	P120	115	4	54
ISONEW	2015-05-07	15:39:30	53	2	P120	115	5	97
ISONEW	2015-05-07	15:39:30	54	1	P120	115	6	138
ISONEW	2015-05-07	15:39:30	39	4	P120	115	7	38
ISONEW	2015-05-07	15:39:30	40	3	P120	115	8	515
ISONEW	2015-05-07	15:39:30	57	4	NOSTIM	116	1	0
ISONEW	2015-05-07	15:39:30	58	3	NOSTIM	116	2	0
ISONEW	2015-05-07	15:39:30	51	5	NOSTIM	116	3	0
ISONEW	2015-05-07	15:39:30	999	999	NOSTIM	116	4	0
ISONEW	2015-05-07	15:39:30	53	2	NOSTIM	116	5	0
ISONEW	2015-05-07	15:39:30	54	1	NOSTIM	116	6	0
ISONEW	2015-05-07	15:39:30	39	4	NOSTIM	116	7	0
ISONEW	2015-05-07	15:39:30	40	3	NOSTIM	116	8	0
ISONEW	2015-05-07	15:39:30	57	4	P120	117	1	146
ISONEW	2015-05-07	15:39:30	58	3	P120	117	2	172
ISONEW	2015-05-07	15:39:30	51	5	P120	117	3	223
ISONEW	2015-05-07	15:39:30	999	999	P120	117	4	77
ISONEW	2015-05-07	15:39:30	53	2	P120	117	5	34
ISONEW	2015-05-07	15:39:30	54	1	P120	117	6	161
ISONEW	2015-05-07	15:39:30	39	4	P120	117	7	134
ISONEW	2015-05-07	15:39:30	40	3	P120	117	8	684
ISONEW	2015-05-07	15:39:30	57	4	NOSTIM	118	1	0
ISONEW	2015-05-07	15:39:30	58	3	NOSTIM	118	2	0
ISONEW	2015-05-07	15:39:30	51	5	NOSTIM	118	3	0
ISONEW	2015-05-07	15:39:30	999	999	NOSTIM	118	4	0
ISONEW	2015-05-07	15:39:30	53	2	NOSTIM	118	5	0
ISONEW	2015-05-07	15:39:30	54	1	NOSTIM	118	6	0
ISONEW	2015-05-07	15:39:30	39	4	NOSTIM	118	7	0
ISONEW	2015-05-07	15:39:30	40	3	NOSTIM	118	8	0
ISONEW	2015-05-07	15:39:30	57	4	P120	119	1	42
ISONEW	2015-05-07	15:39:30	58	3	P120	119	2	72
ISONEW	2015-05-07	15:39:30	51	5	P120	119	3	324
ISONEW	2015-05-07	15:39:30	999	999	P120	119	4	80
ISONEW	2015-05-07	15:39:30	53	2	P120	119	5	46
ISONEW	2015-05-07	15:39:30	54	1	P120	119	6	93
ISONEW	2015-05-07	15:39:30	39	4	P120	119	7	42
ISONEW	2015-05-07	15:39:30	40	3	P120	119	8	631
ISONEW	2015-05-07	15:39:30	57	4	NOSTIM	120	1	0
ISONEW	2015-05-07	15:39:30	58	3	NOSTIM	120	2	0
ISONEW	2015-05-07	15:39:30	51	5	NOSTIM	120	3	0
ISONEW	2015-05-07	15:39:30	999	999	NOSTIM	120	4	0
ISONEW	2015-05-07	15:39:30	53	2	NOSTIM	120	5	0
ISONEW	2015-05-07	15:39:30	54	1	NOSTIM	120	6	0
ISONEW	2015-05-07	15:39:30	39	4	NOSTIM	120	7	0
ISONEW	2015-05-07	15:39:30	40	3	NOSTIM	120	8	0
ISONEW	2015-05-07	16:22:17	32	2	P120	1	1	1976
ISONEW	2015-05-07	16:22:17	34	3	P120	1	2	1265
ISONEW	2015-05-07	16:22:17	59	4	P120	1	3	436
ISONEW	2015-05-07	16:22:17	20	1	P120	1	4	1419
ISONEW	2015-05-07	16:22:17	13	2	P120	1	5	708
ISONEW	2015-05-07	16:22:17	999	999	P120	1	6	40
ISONEW	2015-05-07	16:22:17	7	5	P120	1	7	1753
ISONEW	2015-05-07	16:22:17	8	1	P120	1	8	948
ISONEW	2015-05-07	16:22:17	32	2	NOSTIM	2	1	0
ISONEW	2015-05-07	16:22:17	34	3	NOSTIM	2	2	0
ISONEW	2015-05-07	16:22:17	59	4	NOSTIM	2	3	0
ISONEW	2015-05-07	16:22:17	20	1	NOSTIM	2	4	0
ISONEW	2015-05-07	16:22:17	13	2	NOSTIM	2	5	0
ISONEW	2015-05-07	16:22:17	999	999	NOSTIM	2	6	0
ISONEW	2015-05-07	16:22:17	7	5	NOSTIM	2	7	0
ISONEW	2015-05-07	16:22:17	8	1	NOSTIM	2	8	0
ISONEW	2015-05-07	16:22:17	32	2	P120	3	1	722
ISONEW	2015-05-07	16:22:17	34	3	P120	3	2	1093
ISONEW	2015-05-07	16:22:17	59	4	P120	3	3	247
ISONEW	2015-05-07	16:22:17	20	1	P120	3	4	321
ISONEW	2015-05-07	16:22:17	13	2	P120	3	5	1117
ISONEW	2015-05-07	16:22:17	999	999	P120	3	6	49
ISONEW	2015-05-07	16:22:17	7	5	P120	3	7	1451
ISONEW	2015-05-07	16:22:17	8	1	P120	3	8	127
ISONEW	2015-05-07	16:22:17	32	2	NOSTIM	4	1	0
ISONEW	2015-05-07	16:22:17	34	3	NOSTIM	4	2	0
ISONEW	2015-05-07	16:22:17	59	4	NOSTIM	4	3	0
ISONEW	2015-05-07	16:22:17	20	1	NOSTIM	4	4	0
ISONEW	2015-05-07	16:22:17	13	2	NOSTIM	4	5	0
ISONEW	2015-05-07	16:22:17	999	999	NOSTIM	4	6	0
ISONEW	2015-05-07	16:22:17	7	5	NOSTIM	4	7	0
ISONEW	2015-05-07	16:22:17	8	1	NOSTIM	4	8	0
ISONEW	2015-05-07	16:22:17	32	2	P120	5	1	799
ISONEW	2015-05-07	16:22:17	34	3	P120	5	2	243
ISONEW	2015-05-07	16:22:17	59	4	P120	5	3	369
ISONEW	2015-05-07	16:22:17	20	1	P120	5	4	83
ISONEW	2015-05-07	16:22:17	13	2	P120	5	5	1189
ISONEW	2015-05-07	16:22:17	999	999	P120	5	6	19
ISONEW	2015-05-07	16:22:17	7	5	P120	5	7	266
ISONEW	2015-05-07	16:22:17	8	1	P120	5	8	35
ISONEW	2015-05-07	16:22:17	32	2	NOSTIM	6	1	0
ISONEW	2015-05-07	16:22:17	34	3	NOSTIM	6	2	0
ISONEW	2015-05-07	16:22:17	59	4	NOSTIM	6	3	0
ISONEW	2015-05-07	16:22:17	20	1	NOSTIM	6	4	0
ISONEW	2015-05-07	16:22:17	13	2	NOSTIM	6	5	0
ISONEW	2015-05-07	16:22:17	999	999	NOSTIM	6	6	0
ISONEW	2015-05-07	16:22:17	7	5	NOSTIM	6	7	0
ISONEW	2015-05-07	16:22:17	8	1	NOSTIM	6	8	0
ISONEW	2015-05-07	16:22:17	32	2	P120	7	1	807
ISONEW	2015-05-07	16:22:17	34	3	P120	7	2	141
ISONEW	2015-05-07	16:22:17	59	4	P120	7	3	174
ISONEW	2015-05-07	16:22:17	20	1	P120	7	4	121
ISONEW	2015-05-07	16:22:17	13	2	P120	7	5	1392
ISONEW	2015-05-07	16:22:17	999	999	P120	7	6	1
ISONEW	2015-05-07	16:22:17	7	5	P120	7	7	392
ISONEW	2015-05-07	16:22:17	8	1	P120	7	8	74
ISONEW	2015-05-07	16:22:17	32	2	NOSTIM	8	1	0
ISONEW	2015-05-07	16:22:17	34	3	NOSTIM	8	2	0
ISONEW	2015-05-07	16:22:17	59	4	NOSTIM	8	3	0
ISONEW	2015-05-07	16:22:17	20	1	NOSTIM	8	4	0
ISONEW	2015-05-07	16:22:17	13	2	NOSTIM	8	5	0
ISONEW	2015-05-07	16:22:17	999	999	NOSTIM	8	6	0
ISONEW	2015-05-07	16:22:17	7	5	NOSTIM	8	7	0
ISONEW	2015-05-07	16:22:17	8	1	NOSTIM	8	8	0
ISONEW	2015-05-07	16:22:17	32	2	P120	9	1	691
ISONEW	2015-05-07	16:22:17	34	3	P120	9	2	206
ISONEW	2015-05-07	16:22:17	59	4	P120	9	3	112
ISONEW	2015-05-07	16:22:17	20	1	P120	9	4	178
ISONEW	2015-05-07	16:22:17	13	2	P120	9	5	665
ISONEW	2015-05-07	16:22:17	999	999	P120	9	6	7
ISONEW	2015-05-07	16:22:17	7	5	P120	9	7	118
ISONEW	2015-05-07	16:22:17	8	1	P120	9	8	106
ISONEW	2015-05-07	16:22:17	32	2	NOSTIM	10	1	0
ISONEW	2015-05-07	16:22:17	34	3	NOSTIM	10	2	0
ISONEW	2015-05-07	16:22:17	59	4	NOSTIM	10	3	0
ISONEW	2015-05-07	16:22:17	20	1	NOSTIM	10	4	0
ISONEW	2015-05-07	16:22:17	13	2	NOSTIM	10	5	0
ISONEW	2015-05-07	16:22:17	999	999	NOSTIM	10	6	0
ISONEW	2015-05-07	16:22:17	7	5	NOSTIM	10	7	0
[truncated: 4,721 more rows]

## Sheet: s768ccmb
Session	Date	Time	Subject	Grp	Trial Type	Trial #	Box	Startle
ISONEW	2015-05-19	13:38:10	17	1	P120	1	1	1901
ISONEW	2015-05-19	13:38:10	26	2	P120	1	2	1185
ISONEW	2015-05-19	13:38:10	27	3	P120	1	3	784
ISONEW	2015-05-19	13:38:10	20	4	P120	1	4	2129
ISONEW	2015-05-19	13:38:10	53	5	P120	1	5	307
ISONEW	2015-05-19	13:38:10	54	1	P120	1	6	523
ISONEW	2015-05-19	13:38:10	47	2	P120	1	7	893
ISONEW	2015-05-19	13:38:10	33	3	P120	1	8	1725
ISONEW	2015-05-19	13:38:10	17	1	NOSTIM	2	1	0
ISONEW	2015-05-19	13:38:10	26	2	NOSTIM	2	2	2
ISONEW	2015-05-19	13:38:10	27	3	NOSTIM	2	3	0
ISONEW	2015-05-19	13:38:10	20	4	NOSTIM	2	4	0
ISONEW	2015-05-19	13:38:10	53	5	NOSTIM	2	5	0
ISONEW	2015-05-19	13:38:10	54	1	NOSTIM	2	6	0
ISONEW	2015-05-19	13:38:10	47	2	NOSTIM	2	7	0
ISONEW	2015-05-19	13:38:10	33	3	NOSTIM	2	8	0
ISONEW	2015-05-19	13:38:10	17	1	P120	3	1	1440
ISONEW	2015-05-19	13:38:10	26	2	P120	3	2	552
ISONEW	2015-05-19	13:38:10	27	3	P120	3	3	417
ISONEW	2015-05-19	13:38:10	20	4	P120	3	4	1227
ISONEW	2015-05-19	13:38:10	53	5	P120	3	5	154
ISONEW	2015-05-19	13:38:10	54	1	P120	3	6	1510
ISONEW	2015-05-19	13:38:10	47	2	P120	3	7	502
ISONEW	2015-05-19	13:38:10	33	3	P120	3	8	369
ISONEW	2015-05-19	13:38:10	17	1	NOSTIM	4	1	0
ISONEW	2015-05-19	13:38:10	26	2	NOSTIM	4	2	0
ISONEW	2015-05-19	13:38:10	27	3	NOSTIM	4	3	0
ISONEW	2015-05-19	13:38:10	20	4	NOSTIM	4	4	0
ISONEW	2015-05-19	13:38:10	53	5	NOSTIM	4	5	0
ISONEW	2015-05-19	13:38:10	54	1	NOSTIM	4	6	0
ISONEW	2015-05-19	13:38:10	47	2	NOSTIM	4	7	0
ISONEW	2015-05-19	13:38:10	33	3	NOSTIM	4	8	0
ISONEW	2015-05-19	13:38:10	17	1	P120	5	1	1268
ISONEW	2015-05-19	13:38:10	26	2	P120	5	2	213
ISONEW	2015-05-19	13:38:10	27	3	P120	5	3	123
ISONEW	2015-05-19	13:38:10	20	4	P120	5	4	963
ISONEW	2015-05-19	13:38:10	53	5	P120	5	5	204
ISONEW	2015-05-19	13:38:10	54	1	P120	5	6	257
ISONEW	2015-05-19	13:38:10	47	2	P120	5	7	585
ISONEW	2015-05-19	13:38:10	33	3	P120	5	8	339
ISONEW	2015-05-19	13:38:10	17	1	NOSTIM	6	1	0
ISONEW	2015-05-19	13:38:10	26	2	NOSTIM	6	2	0
ISONEW	2015-05-19	13:38:10	27	3	NOSTIM	6	3	0
ISONEW	2015-05-19	13:38:10	20	4	NOSTIM	6	4	0
ISONEW	2015-05-19	13:38:10	53	5	NOSTIM	6	5	0
ISONEW	2015-05-19	13:38:10	54	1	NOSTIM	6	6	0
ISONEW	2015-05-19	13:38:10	47	2	NOSTIM	6	7	0
ISONEW	2015-05-19	13:38:10	33	3	NOSTIM	6	8	0
ISONEW	2015-05-19	13:38:10	17	1	P120	7	1	600
ISONEW	2015-05-19	13:38:10	26	2	P120	7	2	273
ISONEW	2015-05-19	13:38:10	27	3	P120	7	3	673
ISONEW	2015-05-19	13:38:10	20	4	P120	7	4	1183
ISONEW	2015-05-19	13:38:10	53	5	P120	7	5	174
ISONEW	2015-05-19	13:38:10	54	1	P120	7	6	435
ISONEW	2015-05-19	13:38:10	47	2	P120	7	7	825
ISONEW	2015-05-19	13:38:10	33	3	P120	7	8	276
ISONEW	2015-05-19	13:38:10	17	1	NOSTIM	8	1	0
ISONEW	2015-05-19	13:38:10	26	2	NOSTIM	8	2	0
ISONEW	2015-05-19	13:38:10	27	3	NOSTIM	8	3	0
ISONEW	2015-05-19	13:38:10	20	4	NOSTIM	8	4	0
ISONEW	2015-05-19	13:38:10	53	5	NOSTIM	8	5	0
ISONEW	2015-05-19	13:38:10	54	1	NOSTIM	8	6	0
ISONEW	2015-05-19	13:38:10	47	2	NOSTIM	8	7	0
ISONEW	2015-05-19	13:38:10	33	3	NOSTIM	8	8	0
ISONEW	2015-05-19	13:38:10	17	1	P120	9	1	1348
ISONEW	2015-05-19	13:38:10	26	2	P120	9	2	127
ISONEW	2015-05-19	13:38:10	27	3	P120	9	3	180
ISONEW	2015-05-19	13:38:10	20	4	P120	9	4	2028
ISONEW	2015-05-19	13:38:10	53	5	P120	9	5	278
ISONEW	2015-05-19	13:38:10	54	1	P120	9	6	260
ISONEW	2015-05-19	13:38:10	47	2	P120	9	7	203
ISONEW	2015-05-19	13:38:10	33	3	P120	9	8	160
ISONEW	2015-05-19	13:38:10	17	1	NOSTIM	10	1	0
ISONEW	2015-05-19	13:38:10	26	2	NOSTIM	10	2	0
ISONEW	2015-05-19	13:38:10	27	3	NOSTIM	10	3	0
ISONEW	2015-05-19	13:38:10	20	4	NOSTIM	10	4	0
ISONEW	2015-05-19	13:38:10	53	5	NOSTIM	10	5	0
ISONEW	2015-05-19	13:38:10	54	1	NOSTIM	10	6	0
ISONEW	2015-05-19	13:38:10	47	2	NOSTIM	10	7	0
ISONEW	2015-05-19	13:38:10	33	3	NOSTIM	10	8	0
ISONEW	2015-05-19	13:38:10	17	1	P120	11	1	297
ISONEW	2015-05-19	13:38:10	26	2	P120	11	2	601
ISONEW	2015-05-19	13:38:10	27	3	P120	11	3	379
ISONEW	2015-05-19	13:38:10	20	4	P120	11	4	988
ISONEW	2015-05-19	13:38:10	53	5	P120	11	5	901
ISONEW	2015-05-19	13:38:10	54	1	P120	11	6	143
ISONEW	2015-05-19	13:38:10	47	2	P120	11	7	261
ISONEW	2015-05-19	13:38:10	33	3	P120	11	8	191
ISONEW	2015-05-19	13:38:10	17	1	NOSTIM	12	1	0
ISONEW	2015-05-19	13:38:10	26	2	NOSTIM	12	2	0
ISONEW	2015-05-19	13:38:10	27	3	NOSTIM	12	3	0
ISONEW	2015-05-19	13:38:10	20	4	NOSTIM	12	4	0
ISONEW	2015-05-19	13:38:10	53	5	NOSTIM	12	5	0
ISONEW	2015-05-19	13:38:10	54	1	NOSTIM	12	6	0
ISONEW	2015-05-19	13:38:10	47	2	NOSTIM	12	7	0
ISONEW	2015-05-19	13:38:10	33	3	NOSTIM	12	8	2
ISONEW	2015-05-19	13:38:10	17	1	PP6P120	13	1	182
ISONEW	2015-05-19	13:38:10	26	2	PP6P120	13	2	28
ISONEW	2015-05-19	13:38:10	27	3	PP6P120	13	3	167
ISONEW	2015-05-19	13:38:10	20	4	PP6P120	13	4	1070
ISONEW	2015-05-19	13:38:10	53	5	PP6P120	13	5	64
ISONEW	2015-05-19	13:38:10	54	1	PP6P120	13	6	86
ISONEW	2015-05-19	13:38:10	47	2	PP6P120	13	7	124
ISONEW	2015-05-19	13:38:10	33	3	PP6P120	13	8	111
ISONEW	2015-05-19	13:38:10	17	1	NOSTIM	14	1	0
ISONEW	2015-05-19	13:38:10	26	2	NOSTIM	14	2	0
ISONEW	2015-05-19	13:38:10	27	3	NOSTIM	14	3	0
ISONEW	2015-05-19	13:38:10	20	4	NOSTIM	14	4	0
ISONEW	2015-05-19	13:38:10	53	5	NOSTIM	14	5	0
ISONEW	2015-05-19	13:38:10	54	1	NOSTIM	14	6	0
ISONEW	2015-05-19	13:38:10	47	2	NOSTIM	14	7	0
ISONEW	2015-05-19	13:38:10	33	3	NOSTIM	14	8	4
ISONEW	2015-05-19	13:38:10	17	1	PP12P120	15	1	125
ISONEW	2015-05-19	13:38:10	26	2	PP12P120	15	2	16
ISONEW	2015-05-19	13:38:10	27	3	PP12P120	15	3	59
ISONEW	2015-05-19	13:38:10	20	4	PP12P120	15	4	136
ISONEW	2015-05-19	13:38:10	53	5	PP12P120	15	5	114
ISONEW	2015-05-19	13:38:10	54	1	PP12P120	15	6	9
ISONEW	2015-05-19	13:38:10	47	2	PP12P120	15	7	76
ISONEW	2015-05-19	13:38:10	33	3	PP12P120	15	8	42
ISONEW	2015-05-19	13:38:10	17	1	NOSTIM	16	1	0
ISONEW	2015-05-19	13:38:10	26	2	NOSTIM	16	2	0
ISONEW	2015-05-19	13:38:10	27	3	NOSTIM	16	3	0
ISONEW	2015-05-19	13:38:10	20	4	NOSTIM	16	4	0
ISONEW	2015-05-19	13:38:10	53	5	NOSTIM	16	5	0
ISONEW	2015-05-19	13:38:10	54	1	NOSTIM	16	6	0
ISONEW	2015-05-19	13:38:10	47	2	NOSTIM	16	7	0
ISONEW	2015-05-19	13:38:10	33	3	NOSTIM	16	8	0
ISONEW	2015-05-19	13:38:10	17	1	PP3P120	17	1	570
ISONEW	2015-05-19	13:38:10	26	2	PP3P120	17	2	140
ISONEW	2015-05-19	13:38:10	27	3	PP3P120	17	3	295
ISONEW	2015-05-19	13:38:10	20	4	PP3P120	17	4	488
ISONEW	2015-05-19	13:38:10	53	5	PP3P120	17	5	323
ISONEW	2015-05-19	13:38:10	54	1	PP3P120	17	6	180
ISONEW	2015-05-19	13:38:10	47	2	PP3P120	17	7	177
ISONEW	2015-05-19	13:38:10	33	3	PP3P120	17	8	147
ISONEW	2015-05-19	13:38:10	17	1	NOSTIM	18	1	0
ISONEW	2015-05-19	13:38:10	26	2	NOSTIM	18	2	0
ISONEW	2015-05-19	13:38:10	27	3	NOSTIM	18	3	0
ISONEW	2015-05-19	13:38:10	20	4	NOSTIM	18	4	0
ISONEW	2015-05-19	13:38:10	53	5	NOSTIM	18	5	0
ISONEW	2015-05-19	13:38:10	54	1	NOSTIM	18	6	0
ISONEW	2015-05-19	13:38:10	47	2	NOSTIM	18	7	0
ISONEW	2015-05-19	13:38:10	33	3	NOSTIM	18	8	0
ISONEW	2015-05-19	13:38:10	17	1	P120	19	1	1011
ISONEW	2015-05-19	13:38:10	26	2	P120	19	2	109
ISONEW	2015-05-19	13:38:10	27	3	P120	19	3	284
ISONEW	2015-05-19	13:38:10	20	4	P120	19	4	218
ISONEW	2015-05-19	13:38:10	53	5	P120	19	5	420
ISONEW	2015-05-19	13:38:10	54	1	P120	19	6	238
ISONEW	2015-05-19	13:38:10	47	2	P120	19	7	160
ISONEW	2015-05-19	13:38:10	33	3	P120	19	8	77
ISONEW	2015-05-19	13:38:10	17	1	NOSTIM	20	1	0
ISONEW	2015-05-19	13:38:10	26	2	NOSTIM	20	2	0
ISONEW	2015-05-19	13:38:10	27	3	NOSTIM	20	3	0
ISONEW	2015-05-19	13:38:10	20	4	NOSTIM	20	4	0
ISONEW	2015-05-19	13:38:10	53	5	NOSTIM	20	5	0
ISONEW	2015-05-19	13:38:10	54	1	NOSTIM	20	6	0
ISONEW	2015-05-19	13:38:10	47	2	NOSTIM	20	7	0
ISONEW	2015-05-19	13:38:10	33	3	NOSTIM	20	8	0
ISONEW	2015-05-19	13:38:10	17	1	PP6P120	21	1	133
ISONEW	2015-05-19	13:38:10	26	2	PP6P120	21	2	115
ISONEW	2015-05-19	13:38:10	27	3	PP6P120	21	3	119
ISONEW	2015-05-19	13:38:10	20	4	PP6P120	21	4	224
ISONEW	2015-05-19	13:38:10	53	5	PP6P120	21	5	281
ISONEW	2015-05-19	13:38:10	54	1	PP6P120	21	6	13
ISONEW	2015-05-19	13:38:10	47	2	PP6P120	21	7	64
ISONEW	2015-05-19	13:38:10	33	3	PP6P120	21	8	17
ISONEW	2015-05-19	13:38:10	17	1	NOSTIM	22	1	0
ISONEW	2015-05-19	13:38:10	26	2	NOSTIM	22	2	0
ISONEW	2015-05-19	13:38:10	27	3	NOSTIM	22	3	0
ISONEW	2015-05-19	13:38:10	20	4	NOSTIM	22	4	0
ISONEW	2015-05-19	13:38:10	53	5	NOSTIM	22	5	0
ISONEW	2015-05-19	13:38:10	54	1	NOSTIM	22	6	0
ISONEW	2015-05-19	13:38:10	47	2	NOSTIM	22	7	0
ISONEW	2015-05-19	13:38:10	33	3	NOSTIM	22	8	0
ISONEW	2015-05-19	13:38:10	17	1	PP3P120	23	1	89
ISONEW	2015-05-19	13:38:10	26	2	PP3P120	23	2	41
ISONEW	2015-05-19	13:38:10	27	3	PP3P120	23	3	205
ISONEW	2015-05-19	13:38:10	20	4	PP3P120	23	4	161
ISONEW	2015-05-19	13:38:10	53	5	PP3P120	23	5	196
ISONEW	2015-05-19	13:38:10	54	1	PP3P120	23	6	115
ISONEW	2015-05-19	13:38:10	47	2	PP3P120	23	7	166
ISONEW	2015-05-19	13:38:10	33	3	PP3P120	23	8	35
ISONEW	2015-05-19	13:38:10	17	1	NOSTIM	24	1	0
ISONEW	2015-05-19	13:38:10	26	2	NOSTIM	24	2	0
ISONEW	2015-05-19	13:38:10	27	3	NOSTIM	24	3	0
ISONEW	2015-05-19	13:38:10	20	4	NOSTIM	24	4	0
ISONEW	2015-05-19	13:38:10	53	5	NOSTIM	24	5	0
ISONEW	2015-05-19	13:38:10	54	1	NOSTIM	24	6	0
ISONEW	2015-05-19	13:38:10	47	2	NOSTIM	24	7	0
ISONEW	2015-05-19	13:38:10	33	3	NOSTIM	24	8	0
ISONEW	2015-05-19	13:38:10	17	1	PP6P120	25	1	90
ISONEW	2015-05-19	13:38:10	26	2	PP6P120	25	2	39
ISONEW	2015-05-19	13:38:10	27	3	PP6P120	25	3	109
ISONEW	2015-05-19	13:38:10	20	4	PP6P120	25	4	45
ISONEW	2015-05-19	13:38:10	53	5	PP6P120	25	5	101
ISONEW	2015-05-19	13:38:10	54	1	PP6P120	25	6	57
ISONEW	2015-05-19	13:38:10	47	2	PP6P120	25	7	126
ISONEW	2015-05-19	13:38:10	33	3	PP6P120	25	8	17
ISONEW	2015-05-19	13:38:10	17	1	NOSTIM	26	1	0
ISONEW	2015-05-19	13:38:10	26	2	NOSTIM	26	2	0
ISONEW	2015-05-19	13:38:10	27	3	NOSTIM	26	3	0
ISONEW	2015-05-19	13:38:10	20	4	NOSTIM	26	4	0
ISONEW	2015-05-19	13:38:10	53	5	NOSTIM	26	5	0
ISONEW	2015-05-19	13:38:10	54	1	NOSTIM	26	6	0
ISONEW	2015-05-19	13:38:10	47	2	NOSTIM	26	7	0
ISONEW	2015-05-19	13:38:10	33	3	NOSTIM	26	8	0
ISONEW	2015-05-19	13:38:10	17	1	P120	27	1	273
ISONEW	2015-05-19	13:38:10	26	2	P120	27	2	260
ISONEW	2015-05-19	13:38:10	27	3	P120	27	3	301
ISONEW	2015-05-19	13:38:10	20	4	P120	27	4	425
ISONEW	2015-05-19	13:38:10	53	5	P120	27	5	198
ISONEW	2015-05-19	13:38:10	54	1	P120	27	6	54
ISONEW	2015-05-19	13:38:10	47	2	P120	27	7	203
ISONEW	2015-05-19	13:38:10	33	3	P120	27	8	20
ISONEW	2015-05-19	13:38:10	17	1	NOSTIM	28	1	0
ISONEW	2015-05-19	13:38:10	26	2	NOSTIM	28	2	0
ISONEW	2015-05-19	13:38:10	27	3	NOSTIM	28	3	0
ISONEW	2015-05-19	13:38:10	20	4	NOSTIM	28	4	0
ISONEW	2015-05-19	13:38:10	53	5	NOSTIM	28	5	0
ISONEW	2015-05-19	13:38:10	54	1	NOSTIM	28	6	0
ISONEW	2015-05-19	13:38:10	47	2	NOSTIM	28	7	0
ISONEW	2015-05-19	13:38:10	33	3	NOSTIM	28	8	20
ISONEW	2015-05-19	13:38:10	17	1	PP12P120	29	1	60
ISONEW	2015-05-19	13:38:10	26	2	PP12P120	29	2	43
ISONEW	2015-05-19	13:38:10	27	3	PP12P120	29	3	32
ISONEW	2015-05-19	13:38:10	20	4	PP12P120	29	4	45
ISONEW	2015-05-19	13:38:10	53	5	PP12P120	29	5	64
ISONEW	2015-05-19	13:38:10	54	1	PP12P120	29	6	2
ISONEW	2015-05-19	13:38:10	47	2	PP12P120	29	7	30
ISONEW	2015-05-19	13:38:10	33	3	PP12P120	29	8	110
ISONEW	2015-05-19	13:38:10	17	1	NOSTIM	30	1	0
ISONEW	2015-05-19	13:38:10	26	2	NOSTIM	30	2	0
ISONEW	2015-05-19	13:38:10	27	3	NOSTIM	30	3	0
ISONEW	2015-05-19	13:38:10	20	4	NOSTIM	30	4	0
ISONEW	2015-05-19	13:38:10	53	5	NOSTIM	30	5	0
ISONEW	2015-05-19	13:38:10	54	1	NOSTIM	30	6	2
ISONEW	2015-05-19	13:38:10	47	2	NOSTIM	30	7	0
ISONEW	2015-05-19	13:38:10	33	3	NOSTIM	30	8	0
ISONEW	2015-05-19	13:38:10	17	1	P120	31	1	556
ISONEW	2015-05-19	13:38:10	26	2	P120	31	2	343
ISONEW	2015-05-19	13:38:10	27	3	P120	31	3	321
ISONEW	2015-05-19	13:38:10	20	4	P120	31	4	214
ISONEW	2015-05-19	13:38:10	53	5	P120	31	5	268
ISONEW	2015-05-19	13:38:10	54	1	P120	31	6	124
ISONEW	2015-05-19	13:38:10	47	2	P120	31	7	170
ISONEW	2015-05-19	13:38:10	33	3	P120	31	8	112
ISONEW	2015-05-19	13:38:10	17	1	NOSTIM	32	1	0
ISONEW	2015-05-19	13:38:10	26	2	NOSTIM	32	2	0
ISONEW	2015-05-19	13:38:10	27	3	NOSTIM	32	3	0
ISONEW	2015-05-19	13:38:10	20	4	NOSTIM	32	4	0
ISONEW	2015-05-19	13:38:10	53	5	NOSTIM	32	5	0
ISONEW	2015-05-19	13:38:10	54	1	NOSTIM	32	6	0
ISONEW	2015-05-19	13:38:10	47	2	NOSTIM	32	7	0
ISONEW	2015-05-19	13:38:10	33	3	NOSTIM	32	8	0
ISONEW	2015-05-19	13:38:10	17	1	PP3P120	33	1	192
ISONEW	2015-05-19	13:38:10	26	2	PP3P120	33	2	253
ISONEW	2015-05-19	13:38:10	27	3	PP3P120	33	3	388
ISONEW	2015-05-19	13:38:10	20	4	PP3P120	33	4	172
ISONEW	2015-05-19	13:38:10	53	5	PP3P120	33	5	113
ISONEW	2015-05-19	13:38:10	54	1	PP3P120	33	6	101
ISONEW	2015-05-19	13:38:10	47	2	PP3P120	33	7	158
ISONEW	2015-05-19	13:38:10	33	3	PP3P120	33	8	9
ISONEW	2015-05-19	13:38:10	17	1	NOSTIM	34	1	0
ISONEW	2015-05-19	13:38:10	26	2	NOSTIM	34	2	0
ISONEW	2015-05-19	13:38:10	27	3	NOSTIM	34	3	0
ISONEW	2015-05-19	13:38:10	20	4	NOSTIM	34	4	0
ISONEW	2015-05-19	13:38:10	53	5	NOSTIM	34	5	0
ISONEW	2015-05-19	13:38:10	54	1	NOSTIM	34	6	0
ISONEW	2015-05-19	13:38:10	47	2	NOSTIM	34	7	0
ISONEW	2015-05-19	13:38:10	33	3	NOSTIM	34	8	0
ISONEW	2015-05-19	13:38:10	17	1	PP12P120	35	1	93
ISONEW	2015-05-19	13:38:10	26	2	PP12P120	35	2	131
ISONEW	2015-05-19	13:38:10	27	3	PP12P120	35	3	64
ISONEW	2015-05-19	13:38:10	20	4	PP12P120	35	4	41
ISONEW	2015-05-19	13:38:10	53	5	PP12P120	35	5	8
ISONEW	2015-05-19	13:38:10	54	1	PP12P120	35	6	4
ISONEW	2015-05-19	13:38:10	47	2	PP12P120	35	7	59
ISONEW	2015-05-19	13:38:10	33	3	PP12P120	35	8	262
ISONEW	2015-05-19	13:38:10	17	1	NOSTIM	36	1	0
ISONEW	2015-05-19	13:38:10	26	2	NOSTIM	36	2	0
ISONEW	2015-05-19	13:38:10	27	3	NOSTIM	36	3	0
ISONEW	2015-05-19	13:38:10	20	4	NOSTIM	36	4	0
ISONEW	2015-05-19	13:38:10	53	5	NOSTIM	36	5	0
ISONEW	2015-05-19	13:38:10	54	1	NOSTIM	36	6	0
ISONEW	2015-05-19	13:38:10	47	2	NOSTIM	36	7	0
ISONEW	2015-05-19	13:38:10	33	3	NOSTIM	36	8	0
ISONEW	2015-05-19	13:38:10	17	1	PP3P120	37	1	168
ISONEW	2015-05-19	13:38:10	26	2	PP3P120	37	2	182
ISONEW	2015-05-19	13:38:10	27	3	PP3P120	37	3	169
ISONEW	2015-05-19	13:38:10	20	4	PP3P120	37	4	763
ISONEW	2015-05-19	13:38:10	53	5	PP3P120	37	5	118
ISONEW	2015-05-19	13:38:10	54	1	PP3P120	37	6	50
ISONEW	2015-05-19	13:38:10	47	2	PP3P120	37	7	125
ISONEW	2015-05-19	13:38:10	33	3	PP3P120	37	8	195
ISONEW	2015-05-19	13:38:10	17	1	NOSTIM	38	1	0
ISONEW	2015-05-19	13:38:10	26	2	NOSTIM	38	2	0
ISONEW	2015-05-19	13:38:10	27	3	NOSTIM	38	3	0
ISONEW	2015-05-19	13:38:10	20	4	NOSTIM	38	4	1
ISONEW	2015-05-19	13:38:10	53	5	NOSTIM	38	5	0
ISONEW	2015-05-19	13:38:10	54	1	NOSTIM	38	6	0
ISONEW	2015-05-19	13:38:10	47	2	NOSTIM	38	7	0
ISONEW	2015-05-19	13:38:10	33	3	NOSTIM	38	8	0
ISONEW	2015-05-19	13:38:10	17	1	PP12P120	39	1	229
ISONEW	2015-05-19	13:38:10	26	2	PP12P120	39	2	47
ISONEW	2015-05-19	13:38:10	27	3	PP12P120	39	3	58
ISONEW	2015-05-19	13:38:10	20	4	PP12P120	39	4	35
ISONEW	2015-05-19	13:38:10	53	5	PP12P120	39	5	22
ISONEW	2015-05-19	13:38:10	54	1	PP12P120	39	6	13
ISONEW	2015-05-19	13:38:10	47	2	PP12P120	39	7	47
ISONEW	2015-05-19	13:38:10	33	3	PP12P120	39	8	6
ISONEW	2015-05-19	13:38:10	17	1	NOSTIM	40	1	0
ISONEW	2015-05-19	13:38:10	26	2	NOSTIM	40	2	0
ISONEW	2015-05-19	13:38:10	27	3	NOSTIM	40	3	0
ISONEW	2015-05-19	13:38:10	20	4	NOSTIM	40	4	1
ISONEW	2015-05-19	13:38:10	53	5	NOSTIM	40	5	0
ISONEW	2015-05-19	13:38:10	54	1	NOSTIM	40	6	0
ISONEW	2015-05-19	13:38:10	47	2	NOSTIM	40	7	1
ISONEW	2015-05-19	13:38:10	33	3	NOSTIM	40	8	0
ISONEW	2015-05-19	13:38:10	17	1	PP6P120	41	1	108
ISONEW	2015-05-19	13:38:10	26	2	PP6P120	41	2	119
ISONEW	2015-05-19	13:38:10	27	3	PP6P120	41	3	149
ISONEW	2015-05-19	13:38:10	20	4	PP6P120	41	4	288
ISONEW	2015-05-19	13:38:10	53	5	PP6P120	41	5	10
ISONEW	2015-05-19	13:38:10	54	1	PP6P120	41	6	7
ISONEW	2015-05-19	13:38:10	47	2	PP6P120	41	7	148
ISONEW	2015-05-19	13:38:10	33	3	PP6P120	41	8	10
ISONEW	2015-05-19	13:38:10	17	1	NOSTIM	42	1	0
ISONEW	2015-05-19	13:38:10	26	2	NOSTIM	42	2	0
ISONEW	2015-05-19	13:38:10	27	3	NOSTIM	42	3	0
ISONEW	2015-05-19	13:38:10	20	4	NOSTIM	42	4	4
ISONEW	2015-05-19	13:38:10	53	5	NOSTIM	42	5	0
ISONEW	2015-05-19	13:38:10	54	1	NOSTIM	42	6	0
ISONEW	2015-05-19	13:38:10	47	2	NOSTIM	42	7	0
ISONEW	2015-05-19	13:38:10	33	3	NOSTIM	42	8	0
ISONEW	2015-05-19	13:38:10	17	1	P120	43	1	173
ISONEW	2015-05-19	13:38:10	26	2	P120	43	2	280
ISONEW	2015-05-19	13:38:10	27	3	P120	43	3	80
ISONEW	2015-05-19	13:38:10	20	4	P120	43	4	508
ISONEW	2015-05-19	13:38:10	53	5	P120	43	5	19
ISONEW	2015-05-19	13:38:10	54	1	P120	43	6	77
ISONEW	2015-05-19	13:38:10	47	2	P120	43	7	139
ISONEW	2015-05-19	13:38:10	33	3	P120	43	8	52
ISONEW	2015-05-19	13:38:10	17	1	NOSTIM	44	1	0
ISONEW	2015-05-19	13:38:10	26	2	NOSTIM	44	2	0
ISONEW	2015-05-19	13:38:10	27	3	NOSTIM	44	3	0
ISONEW	2015-05-19	13:38:10	20	4	NOSTIM	44	4	0
ISONEW	2015-05-19	13:38:10	53	5	NOSTIM	44	5	0
ISONEW	2015-05-19	13:38:10	54	1	NOSTIM	44	6	0
ISONEW	2015-05-19	13:38:10	47	2	NOSTIM	44	7	0
ISONEW	2015-05-19	13:38:10	33	3	NOSTIM	44	8	0
ISONEW	2015-05-19	13:38:10	17	1	PP3P120	45	1	114
ISONEW	2015-05-19	13:38:10	26	2	PP3P120	45	2	152
ISONEW	2015-05-19	13:38:10	27	3	PP3P120	45	3	287
ISONEW	2015-05-19	13:38:10	20	4	PP3P120	45	4	89
ISONEW	2015-05-19	13:38:10	53	5	PP3P120	45	5	12
ISONEW	2015-05-19	13:38:10	54	1	PP3P120	45	6	31
ISONEW	2015-05-19	13:38:10	47	2	PP3P120	45	7	115
ISONEW	2015-05-19	13:38:10	33	3	PP3P120	45	8	10
ISONEW	2015-05-19	13:38:10	17	1	NOSTIM	46	1	0
ISONEW	2015-05-19	13:38:10	26	2	NOSTIM	46	2	0
ISONEW	2015-05-19	13:38:10	27	3	NOSTIM	46	3	0
ISONEW	2015-05-19	13:38:10	20	4	NOSTIM	46	4	0
ISONEW	2015-05-19	13:38:10	53	5	NOSTIM	46	5	0
ISONEW	2015-05-19	13:38:10	54	1	NOSTIM	46	6	0
ISONEW	2015-05-19	13:38:10	47	2	NOSTIM	46	7	0
ISONEW	2015-05-19	13:38:10	33	3	NOSTIM	46	8	0
ISONEW	2015-05-19	13:38:10	17	1	PP12P120	47	1	47
ISONEW	2015-05-19	13:38:10	26	2	PP12P120	47	2	29
ISONEW	2015-05-19	13:38:10	27	3	PP12P120	47	3	36
ISONEW	2015-05-19	13:38:10	20	4	PP12P120	47	4	34
ISONEW	2015-05-19	13:38:10	53	5	PP12P120	47	5	1
ISONEW	2015-05-19	13:38:10	54	1	PP12P120	47	6	8
ISONEW	2015-05-19	13:38:10	47	2	PP12P120	47	7	74
ISONEW	2015-05-19	13:38:10	33	3	PP12P120	47	8	2
ISONEW	2015-05-19	13:38:10	17	1	NOSTIM	48	1	0
ISONEW	2015-05-19	13:38:10	26	2	NOSTIM	48	2	0
ISONEW	2015-05-19	13:38:10	27	3	NOSTIM	48	3	0
ISONEW	2015-05-19	13:38:10	20	4	NOSTIM	48	4	12
ISONEW	2015-05-19	13:38:10	53	5	NOSTIM	48	5	0
ISONEW	2015-05-19	13:38:10	54	1	NOSTIM	48	6	0
ISONEW	2015-05-19	13:38:10	47	2	NOSTIM	48	7	0
ISONEW	2015-05-19	13:38:10	33	3	NOSTIM	48	8	0
ISONEW	2015-05-19	13:38:10	17	1	PP6P120	49	1	110
ISONEW	2015-05-19	13:38:10	26	2	PP6P120	49	2	8
ISONEW	2015-05-19	13:38:10	27	3	PP6P120	49	3	67
ISONEW	2015-05-19	13:38:10	20	4	PP6P120	49	4	207
ISONEW	2015-05-19	13:38:10	53	5	PP6P120	49	5	32
ISONEW	2015-05-19	13:38:10	54	1	PP6P120	49	6	45
ISONEW	2015-05-19	13:38:10	47	2	PP6P120	49	7	121
ISONEW	2015-05-19	13:38:10	33	3	PP6P120	49	8	56
ISONEW	2015-05-19	13:38:10	17	1	NOSTIM	50	1	1
ISONEW	2015-05-19	13:38:10	26	2	NOSTIM	50	2	0
ISONEW	2015-05-19	13:38:10	27	3	NOSTIM	50	3	0
ISONEW	2015-05-19	13:38:10	20	4	NOSTIM	50	4	3
ISONEW	2015-05-19	13:38:10	53	5	NOSTIM	50	5	0
ISONEW	2015-05-19	13:38:10	54	1	NOSTIM	50	6	0
ISONEW	2015-05-19	13:38:10	47	2	NOSTIM	50	7	0
ISONEW	2015-05-19	13:38:10	33	3	NOSTIM	50	8	0
ISONEW	2015-05-19	13:38:10	17	1	P120	51	1	285
ISONEW	2015-05-19	13:38:10	26	2	P120	51	2	500
ISONEW	2015-05-19	13:38:10	27	3	P120	51	3	452
ISONEW	2015-05-19	13:38:10	20	4	P120	51	4	68
ISONEW	2015-05-19	13:38:10	53	5	P120	51	5	30
ISONEW	2015-05-19	13:38:10	54	1	P120	51	6	357
ISONEW	2015-05-19	13:38:10	47	2	P120	51	7	236
ISONEW	2015-05-19	13:38:10	33	3	P120	51	8	18
ISONEW	2015-05-19	13:38:10	17	1	NOSTIM	52	1	0
ISONEW	2015-05-19	13:38:10	26	2	NOSTIM	52	2	0
ISONEW	2015-05-19	13:38:10	27	3	NOSTIM	52	3	0
ISONEW	2015-05-19	13:38:10	20	4	NOSTIM	52	4	0
ISONEW	2015-05-19	13:38:10	53	5	NOSTIM	52	5	0
ISONEW	2015-05-19	13:38:10	54	1	NOSTIM	52	6	1
ISONEW	2015-05-19	13:38:10	47	2	NOSTIM	52	7	0
ISONEW	2015-05-19	13:38:10	33	3	NOSTIM	52	8	0
ISONEW	2015-05-19	13:38:10	17	1	PP3P120	53	1	275
ISONEW	2015-05-19	13:38:10	26	2	PP3P120	53	2	195
ISONEW	2015-05-19	13:38:10	27	3	PP3P120	53	3	68
ISONEW	2015-05-19	13:38:10	20	4	PP3P120	53	4	253
ISONEW	2015-05-19	13:38:10	53	5	PP3P120	53	5	22
ISONEW	2015-05-19	13:38:10	54	1	PP3P120	53	6	84
ISONEW	2015-05-19	13:38:10	47	2	PP3P120	53	7	73
ISONEW	2015-05-19	13:38:10	33	3	PP3P120	53	8	90
ISONEW	2015-05-19	13:38:10	17	1	NOSTIM	54	1	0
ISONEW	2015-05-19	13:38:10	26	2	NOSTIM	54	2	0
ISONEW	2015-05-19	13:38:10	27	3	NOSTIM	54	3	0
ISONEW	2015-05-19	13:38:10	20	4	NOSTIM	54	4	2
ISONEW	2015-05-19	13:38:10	53	5	NOSTIM	54	5	0
ISONEW	2015-05-19	13:38:10	54	1	NOSTIM	54	6	0
ISONEW	2015-05-19	13:38:10	47	2	NOSTIM	54	7	0
ISONEW	2015-05-19	13:38:10	33	3	NOSTIM	54	8	0
ISONEW	2015-05-19	13:38:10	17	1	PP12P120	55	1	71
ISONEW	2015-05-19	13:38:10	26	2	PP12P120	55	2	21
ISONEW	2015-05-19	13:38:10	27	3	PP12P120	55	3	35
ISONEW	2015-05-19	13:38:10	20	4	PP12P120	55	4	32
ISONEW	2015-05-19	13:38:10	53	5	PP12P120	55	5	7
ISONEW	2015-05-19	13:38:10	54	1	PP12P120	55	6	0
ISONEW	2015-05-19	13:38:10	47	2	PP12P120	55	7	50
ISONEW	2015-05-19	13:38:10	33	3	PP12P120	55	8	8
ISONEW	2015-05-19	13:38:10	17	1	NOSTIM	56	1	0
ISONEW	2015-05-19	13:38:10	26	2	NOSTIM	56	2	0
ISONEW	2015-05-19	13:38:10	27	3	NOSTIM	56	3	0
ISONEW	2015-05-19	13:38:10	20	4	NOSTIM	56	4	0
ISONEW	2015-05-19	13:38:10	53	5	NOSTIM	56	5	0
ISONEW	2015-05-19	13:38:10	54	1	NOSTIM	56	6	0
ISONEW	2015-05-19	13:38:10	47	2	NOSTIM	56	7	0
ISONEW	2015-05-19	13:38:10	33	3	NOSTIM	56	8	0
ISONEW	2015-05-19	13:38:10	17	1	P120	57	1	636
ISONEW	2015-05-19	13:38:10	26	2	P120	57	2	30
ISONEW	2015-05-19	13:38:10	27	3	P120	57	3	364
ISONEW	2015-05-19	13:38:10	20	4	P120	57	4	178
ISONEW	2015-05-19	13:38:10	53	5	P120	57	5	66
ISONEW	2015-05-19	13:38:10	54	1	P120	57	6	163
ISONEW	2015-05-19	13:38:10	47	2	P120	57	7	168
ISONEW	2015-05-19	13:38:10	33	3	P120	57	8	93
ISONEW	2015-05-19	13:38:10	17	1	NOSTIM	58	1	0
ISONEW	2015-05-19	13:38:10	26	2	NOSTIM	58	2	2
ISONEW	2015-05-19	13:38:10	27	3	NOSTIM	58	3	0
ISONEW	2015-05-19	13:38:10	20	4	NOSTIM	58	4	0
ISONEW	2015-05-19	13:38:10	53	5	NOSTIM	58	5	0
ISONEW	2015-05-19	13:38:10	54	1	NOSTIM	58	6	0
ISONEW	2015-05-19	13:38:10	47	2	NOSTIM	58	7	0
ISONEW	2015-05-19	13:38:10	33	3	NOSTIM	58	8	0
ISONEW	2015-05-19	13:38:10	17	1	PP6P120	59	1	97
ISONEW	2015-05-19	13:38:10	26	2	PP6P120	59	2	105
ISONEW	2015-05-19	13:38:10	27	3	PP6P120	59	3	36
ISONEW	2015-05-19	13:38:10	20	4	PP6P120	59	4	115
ISONEW	2015-05-19	13:38:10	53	5	PP6P120	59	5	32
ISONEW	2015-05-19	13:38:10	54	1	PP6P120	59	6	5
ISONEW	2015-05-19	13:38:10	47	2	PP6P120	59	7	76
ISONEW	2015-05-19	13:38:10	33	3	PP6P120	59	8	68
ISONEW	2015-05-19	13:38:10	17	1	NOSTIM	60	1	0
ISONEW	2015-05-19	13:38:10	26	2	NOSTIM	60	2	0
ISONEW	2015-05-19	13:38:10	27	3	NOSTIM	60	3	0
ISONEW	2015-05-19	13:38:10	20	4	NOSTIM	60	4	2
ISONEW	2015-05-19	13:38:10	53	5	NOSTIM	60	5	0
ISONEW	2015-05-19	13:38:10	54	1	NOSTIM	60	6	0
ISONEW	2015-05-19	13:38:10	47	2	NOSTIM	60	7	0
ISONEW	2015-05-19	13:38:10	33	3	NOSTIM	60	8	0
ISONEW	2015-05-19	13:38:10	17	1	PP6P120	61	1	80
ISONEW	2015-05-19	13:38:10	26	2	PP6P120	61	2	44
ISONEW	2015-05-19	13:38:10	27	3	PP6P120	61	3	35
ISONEW	2015-05-19	13:38:10	20	4	PP6P120	61	4	162
ISONEW	2015-05-19	13:38:10	53	5	PP6P120	61	5	7
ISONEW	2015-05-19	13:38:10	54	1	PP6P120	61	6	3
ISONEW	2015-05-19	13:38:10	47	2	PP6P120	61	7	114
ISONEW	2015-05-19	13:38:10	33	3	PP6P120	61	8	8
ISONEW	2015-05-19	13:38:10	17	1	NOSTIM	62	1	0
ISONEW	2015-05-19	13:38:10	26	2	NOSTIM	62	2	0
ISONEW	2015-05-19	13:38:10	27	3	NOSTIM	62	3	0
ISONEW	2015-05-19	13:38:10	20	4	NOSTIM	62	4	0
ISONEW	2015-05-19	13:38:10	53	5	NOSTIM	62	5	0
ISONEW	2015-05-19	13:38:10	54	1	NOSTIM	62	6	0
ISONEW	2015-05-19	13:38:10	47	2	NOSTIM	62	7	0
ISONEW	2015-05-19	13:38:10	33	3	NOSTIM	62	8	0
ISONEW	2015-05-19	13:38:10	17	1	PP12P120	63	1	47
ISONEW	2015-05-19	13:38:10	26	2	PP12P120	63	2	18
ISONEW	2015-05-19	13:38:10	27	3	PP12P120	63	3	43
ISONEW	2015-05-19	13:38:10	20	4	PP12P120	63	4	165
ISONEW	2015-05-19	13:38:10	53	5	PP12P120	63	5	3
ISONEW	2015-05-19	13:38:10	54	1	PP12P120	63	6	17
ISONEW	2015-05-19	13:38:10	47	2	PP12P120	63	7	32
ISONEW	2015-05-19	13:38:10	33	3	PP12P120	63	8	68
ISONEW	2015-05-19	13:38:10	17	1	NOSTIM	64	1	0
ISONEW	2015-05-19	13:38:10	26	2	NOSTIM	64	2	0
ISONEW	2015-05-19	13:38:10	27	3	NOSTIM	64	3	0
ISONEW	2015-05-19	13:38:10	20	4	NOSTIM	64	4	0
ISONEW	2015-05-19	13:38:10	53	5	NOSTIM	64	5	0
ISONEW	2015-05-19	13:38:10	54	1	NOSTIM	64	6	0
ISONEW	2015-05-19	13:38:10	47	2	NOSTIM	64	7	0
ISONEW	2015-05-19	13:38:10	33	3	NOSTIM	64	8	15
ISONEW	2015-05-19	13:38:10	17	1	PP3P120	65	1	125
ISONEW	2015-05-19	13:38:10	26	2	PP3P120	65	2	60
ISONEW	2015-05-19	13:38:10	27	3	PP3P120	65	3	230
ISONEW	2015-05-19	13:38:10	20	4	PP3P120	65	4	94
ISONEW	2015-05-19	13:38:10	53	5	PP3P120	65	5	62
ISONEW	2015-05-19	13:38:10	54	1	PP3P120	65	6	38
ISONEW	2015-05-19	13:38:10	47	2	PP3P120	65	7	69
ISONEW	2015-05-19	13:38:10	33	3	PP3P120	65	8	178
ISONEW	2015-05-19	13:38:10	17	1	NOSTIM	66	1	0
ISONEW	2015-05-19	13:38:10	26	2	NOSTIM	66	2	0
ISONEW	2015-05-19	13:38:10	27	3	NOSTIM	66	3	0
ISONEW	2015-05-19	13:38:10	20	4	NOSTIM	66	4	1
ISONEW	2015-05-19	13:38:10	53	5	NOSTIM	66	5	0
ISONEW	2015-05-19	13:38:10	54	1	NOSTIM	66	6	0
ISONEW	2015-05-19	13:38:10	47	2	NOSTIM	66	7	0
ISONEW	2015-05-19	13:38:10	33	3	NOSTIM	66	8	0
ISONEW	2015-05-19	13:38:10	17	1	P120	67	1	512
ISONEW	2015-05-19	13:38:10	26	2	P120	67	2	457
ISONEW	2015-05-19	13:38:10	27	3	P120	67	3	292
ISONEW	2015-05-19	13:38:10	20	4	P120	67	4	46
ISONEW	2015-05-19	13:38:10	53	5	P120	67	5	20
ISONEW	2015-05-19	13:38:10	54	1	P120	67	6	18
ISONEW	2015-05-19	13:38:10	47	2	P120	67	7	115
ISONEW	2015-05-19	13:38:10	33	3	P120	67	8	85
ISONEW	2015-05-19	13:38:10	17	1	NOSTIM	68	1	0
ISONEW	2015-05-19	13:38:10	26	2	NOSTIM	68	2	0
ISONEW	2015-05-19	13:38:10	27	3	NOSTIM	68	3	0
ISONEW	2015-05-19	13:38:10	20	4	NOSTIM	68	4	0
ISONEW	2015-05-19	13:38:10	53	5	NOSTIM	68	5	0
ISONEW	2015-05-19	13:38:10	54	1	NOSTIM	68	6	0
ISONEW	2015-05-19	13:38:10	47	2	NOSTIM	68	7	0
ISONEW	2015-05-19	13:38:10	33	3	NOSTIM	68	8	0
ISONEW	2015-05-19	13:38:10	17	1	PP6P120	69	1	66
ISONEW	2015-05-19	13:38:10	26	2	PP6P120	69	2	54
ISONEW	2015-05-19	13:38:10	27	3	PP6P120	69	3	90
ISONEW	2015-05-19	13:38:10	20	4	PP6P120	69	4	135
ISONEW	2015-05-19	13:38:10	53	5	PP6P120	69	5	3
ISONEW	2015-05-19	13:38:10	54	1	PP6P120	69	6	2
ISONEW	2015-05-19	13:38:10	47	2	PP6P120	69	7	73
ISONEW	2015-05-19	13:38:10	33	3	PP6P120	69	8	34
ISONEW	2015-05-19	13:38:10	17	1	NOSTIM	70	1	0
ISONEW	2015-05-19	13:38:10	26	2	NOSTIM	70	2	0
ISONEW	2015-05-19	13:38:10	27	3	NOSTIM	70	3	0
ISONEW	2015-05-19	13:38:10	20	4	NOSTIM	70	4	0
ISONEW	2015-05-19	13:38:10	53	5	NOSTIM	70	5	0
ISONEW	2015-05-19	13:38:10	54	1	NOSTIM	70	6	0
ISONEW	2015-05-19	13:38:10	47	2	NOSTIM	70	7	0
ISONEW	2015-05-19	13:38:10	33	3	NOSTIM	70	8	0
ISONEW	2015-05-19	13:38:10	17	1	PP3P120	71	1	152
ISONEW	2015-05-19	13:38:10	26	2	PP3P120	71	2	81
ISONEW	2015-05-19	13:38:10	27	3	PP3P120	71	3	153
ISONEW	2015-05-19	13:38:10	20	4	PP3P120	71	4	56
ISONEW	2015-05-19	13:38:10	53	5	PP3P120	71	5	39
ISONEW	2015-05-19	13:38:10	54	1	PP3P120	71	6	127
ISONEW	2015-05-19	13:38:10	47	2	PP3P120	71	7	138
ISONEW	2015-05-19	13:38:10	33	3	PP3P120	71	8	109
ISONEW	2015-05-19	13:38:10	17	1	NOSTIM	72	1	0
ISONEW	2015-05-19	13:38:10	26	2	NOSTIM	72	2	0
ISONEW	2015-05-19	13:38:10	27	3	NOSTIM	72	3	0
ISONEW	2015-05-19	13:38:10	20	4	NOSTIM	72	4	8
ISONEW	2015-05-19	13:38:10	53	5	NOSTIM	72	5	0
ISONEW	2015-05-19	13:38:10	54	1	NOSTIM	72	6	0
ISONEW	2015-05-19	13:38:10	47	2	NOSTIM	72	7	0
ISONEW	2015-05-19	13:38:10	33	3	NOSTIM	72	8	0
ISONEW	2015-05-19	13:38:10	17	1	PP6P120	73	1	101
ISONEW	2015-05-19	13:38:10	26	2	PP6P120	73	2	53
ISONEW	2015-05-19	13:38:10	27	3	PP6P120	73	3	144
ISONEW	2015-05-19	13:38:10	20	4	PP6P120	73	4	88
ISONEW	2015-05-19	13:38:10	53	5	PP6P120	73	5	34
ISONEW	2015-05-19	13:38:10	54	1	PP6P120	73	6	60
ISONEW	2015-05-19	13:38:10	47	2	PP6P120	73	7	153
ISONEW	2015-05-19	13:38:10	33	3	PP6P120	73	8	11
ISONEW	2015-05-19	13:38:10	17	1	NOSTIM	74	1	0
ISONEW	2015-05-19	13:38:10	26	2	NOSTIM	74	2	0
ISONEW	2015-05-19	13:38:10	27	3	NOSTIM	74	3	0
ISONEW	2015-05-19	13:38:10	20	4	NOSTIM	74	4	4
ISONEW	2015-05-19	13:38:10	53	5	NOSTIM	74	5	0
ISONEW	2015-05-19	13:38:10	54	1	NOSTIM	74	6	0
ISONEW	2015-05-19	13:38:10	47	2	NOSTIM	74	7	0
ISONEW	2015-05-19	13:38:10	33	3	NOSTIM	74	8	0
ISONEW	2015-05-19	13:38:10	17	1	P120	75	1	250
ISONEW	2015-05-19	13:38:10	26	2	P120	75	2	75
ISONEW	2015-05-19	13:38:10	27	3	P120	75	3	717
ISONEW	2015-05-19	13:38:10	20	4	P120	75	4	358
ISONEW	2015-05-19	13:38:10	53	5	P120	75	5	169
ISONEW	2015-05-19	13:38:10	54	1	P120	75	6	150
ISONEW	2015-05-19	13:38:10	47	2	P120	75	7	411
ISONEW	2015-05-19	13:38:10	33	3	P120	75	8	255
ISONEW	2015-05-19	13:38:10	17	1	NOSTIM	76	1	0
ISONEW	2015-05-19	13:38:10	26	2	NOSTIM	76	2	0
ISONEW	2015-05-19	13:38:10	27	3	NOSTIM	76	3	0
ISONEW	2015-05-19	13:38:10	20	4	NOSTIM	76	4	0
ISONEW	2015-05-19	13:38:10	53	5	NOSTIM	76	5	0
ISONEW	2015-05-19	13:38:10	54	1	NOSTIM	76	6	0
ISONEW	2015-05-19	13:38:10	47	2	NOSTIM	76	7	0
ISONEW	2015-05-19	13:38:10	33	3	NOSTIM	76	8	0
ISONEW	2015-05-19	13:38:10	17	1	PP12P120	77	1	28
ISONEW	2015-05-19	13:38:10	26	2	PP12P120	77	2	36
ISONEW	2015-05-19	13:38:10	27	3	PP12P120	77	3	36
ISONEW	2015-05-19	13:38:10	20	4	PP12P120	77	4	28
ISONEW	2015-05-19	13:38:10	53	5	PP12P120	77	5	7
ISONEW	2015-05-19	13:38:10	54	1	PP12P120	77	6	1
ISONEW	2015-05-19	13:38:10	47	2	PP12P120	77	7	48
ISONEW	2015-05-19	13:38:10	33	3	PP12P120	77	8	1
ISONEW	2015-05-19	13:38:10	17	1	NOSTIM	78	1	0
ISONEW	2015-05-19	13:38:10	26	2	NOSTIM	78	2	0
ISONEW	2015-05-19	13:38:10	27	3	NOSTIM	78	3	0
ISONEW	2015-05-19	13:38:10	20	4	NOSTIM	78	4	0
ISONEW	2015-05-19	13:38:10	53	5	NOSTIM	78	5	0
ISONEW	2015-05-19	13:38:10	54	1	NOSTIM	78	6	0
ISONEW	2015-05-19	13:38:10	47	2	NOSTIM	78	7	0
ISONEW	2015-05-19	13:38:10	33	3	NOSTIM	78	8	0
ISONEW	2015-05-19	13:38:10	17	1	P120	79	1	1346
ISONEW	2015-05-19	13:38:10	26	2	P120	79	2	122
ISONEW	2015-05-19	13:38:10	27	3	P120	79	3	371
ISONEW	2015-05-19	13:38:10	20	4	P120	79	4	42
ISONEW	2015-05-19	13:38:10	53	5	P120	79	5	161
ISONEW	2015-05-19	13:38:10	54	1	P120	79	6	27
ISONEW	2015-05-19	13:38:10	47	2	P120	79	7	382
ISONEW	2015-05-19	13:38:10	33	3	P120	79	8	46
ISONEW	2015-05-19	13:38:10	17	1	NOSTIM	80	1	0
ISONEW	2015-05-19	13:38:10	26	2	NOSTIM	80	2	0
ISONEW	2015-05-19	13:38:10	27	3	NOSTIM	80	3	0
ISONEW	2015-05-19	13:38:10	20	4	NOSTIM	80	4	5
ISONEW	2015-05-19	13:38:10	53	5	NOSTIM	80	5	0
ISONEW	2015-05-19	13:38:10	54	1	NOSTIM	80	6	0
ISONEW	2015-05-19	13:38:10	47	2	NOSTIM	80	7	0
ISONEW	2015-05-19	13:38:10	33	3	NOSTIM	80	8	0
ISONEW	2015-05-19	13:38:10	17	1	PP3P120	81	1	97
ISONEW	2015-05-19	13:38:10	26	2	PP3P120	81	2	39
ISONEW	2015-05-19	13:38:10	27	3	PP3P120	81	3	172
ISONEW	2015-05-19	13:38:10	20	4	PP3P120	81	4	66
ISONEW	2015-05-19	13:38:10	53	5	PP3P120	81	5	7
ISONEW	2015-05-19	13:38:10	54	1	PP3P120	81	6	3
ISONEW	2015-05-19	13:38:10	47	2	PP3P120	81	7	135
ISONEW	2015-05-19	13:38:10	33	3	PP3P120	81	8	175
ISONEW	2015-05-19	13:38:10	17	1	NOSTIM	82	1	0
ISONEW	2015-05-19	13:38:10	26	2	NOSTIM	82	2	0
ISONEW	2015-05-19	13:38:10	27	3	NOSTIM	82	3	0
ISONEW	2015-05-19	13:38:10	20	4	NOSTIM	82	4	1
ISONEW	2015-05-19	13:38:10	53	5	NOSTIM	82	5	0
ISONEW	2015-05-19	13:38:10	54	1	NOSTIM	82	6	0
ISONEW	2015-05-19	13:38:10	47	2	NOSTIM	82	7	0
ISONEW	2015-05-19	13:38:10	33	3	NOSTIM	82	8	0
ISONEW	2015-05-19	13:38:10	17	1	PP12P120	83	1	47
ISONEW	2015-05-19	13:38:10	26	2	PP12P120	83	2	35
ISONEW	2015-05-19	13:38:10	27	3	PP12P120	83	3	55
ISONEW	2015-05-19	13:38:10	20	4	PP12P120	83	4	55
ISONEW	2015-05-19	13:38:10	53	5	PP12P120	83	5	3
ISONEW	2015-05-19	13:38:10	54	1	PP12P120	83	6	0
ISONEW	2015-05-19	13:38:10	47	2	PP12P120	83	7	47
ISONEW	2015-05-19	13:38:10	33	3	PP12P120	83	8	25
ISONEW	2015-05-19	13:38:10	17	1	NOSTIM	84	1	0
ISONEW	2015-05-19	13:38:10	26	2	NOSTIM	84	2	0
ISONEW	2015-05-19	13:38:10	27	3	NOSTIM	84	3	0
ISONEW	2015-05-19	13:38:10	20	4	NOSTIM	84	4	0
ISONEW	2015-05-19	13:38:10	53	5	NOSTIM	84	5	0
ISONEW	2015-05-19	13:38:10	54	1	NOSTIM	84	6	0
ISONEW	2015-05-19	13:38:10	47	2	NOSTIM	84	7	0
ISONEW	2015-05-19	13:38:10	33	3	NOSTIM	84	8	0
ISONEW	2015-05-19	13:38:10	17	1	PP3P120	85	1	179
ISONEW	2015-05-19	13:38:10	26	2	PP3P120	85	2	58
ISONEW	2015-05-19	13:38:10	27	3	PP3P120	85	3	144
ISONEW	2015-05-19	13:38:10	20	4	PP3P120	85	4	110
ISONEW	2015-05-19	13:38:10	53	5	PP3P120	85	5	343
ISONEW	2015-05-19	13:38:10	54	1	PP3P120	85	6	38
ISONEW	2015-05-19	13:38:10	47	2	PP3P120	85	7	269
ISONEW	2015-05-19	13:38:10	33	3	PP3P120	85	8	10
ISONEW	2015-05-19	13:38:10	17	1	NOSTIM	86	1	0
ISONEW	2015-05-19	13:38:10	26	2	NOSTIM	86	2	0
ISONEW	2015-05-19	13:38:10	27	3	NOSTIM	86	3	0
ISONEW	2015-05-19	13:38:10	20	4	NOSTIM	86	4	6
ISONEW	2015-05-19	13:38:10	53	5	NOSTIM	86	5	0
ISONEW	2015-05-19	13:38:10	54	1	NOSTIM	86	6	0
ISONEW	2015-05-19	13:38:10	47	2	NOSTIM	86	7	0
ISONEW	2015-05-19	13:38:10	33	3	NOSTIM	86	8	0
ISONEW	2015-05-19	13:38:10	17	1	PP12P120	87	1	38
ISONEW	2015-05-19	13:38:10	26	2	PP12P120	87	2	36
ISONEW	2015-05-19	13:38:10	27	3	PP12P120	87	3	69
ISONEW	2015-05-19	13:38:10	20	4	PP12P120	87	4	244
ISONEW	2015-05-19	13:38:10	53	5	PP12P120	87	5	0
ISONEW	2015-05-19	13:38:10	54	1	PP12P120	87	6	1
ISONEW	2015-05-19	13:38:10	47	2	PP12P120	87	7	40
ISONEW	2015-05-19	13:38:10	33	3	PP12P120	87	8	5
ISONEW	2015-05-19	13:38:10	17	1	NOSTIM	88	1	0
ISONEW	2015-05-19	13:38:10	26	2	NOSTIM	88	2	0
ISONEW	2015-05-19	13:38:10	27	3	NOSTIM	88	3	0
ISONEW	2015-05-19	13:38:10	20	4	NOSTIM	88	4	6
ISONEW	2015-05-19	13:38:10	53	5	NOSTIM	88	5	0
ISONEW	2015-05-19	13:38:10	54	1	NOSTIM	88	6	0
ISONEW	2015-05-19	13:38:10	47	2	NOSTIM	88	7	0
ISONEW	2015-05-19	13:38:10	33	3	NOSTIM	88	8	33
ISONEW	2015-05-19	13:38:10	17	1	PP6P120	89	1	64
ISONEW	2015-05-19	13:38:10	26	2	PP6P120	89	2	38
ISONEW	2015-05-19	13:38:10	27	3	PP6P120	89	3	150
ISONEW	2015-05-19	13:38:10	20	4	PP6P120	89	4	408
ISONEW	2015-05-19	13:38:10	53	5	PP6P120	89	5	2
ISONEW	2015-05-19	13:38:10	54	1	PP6P120	89	6	287
ISONEW	2015-05-19	13:38:10	47	2	PP6P120	89	7	113
ISONEW	2015-05-19	13:38:10	33	3	PP6P120	89	8	70
ISONEW	2015-05-19	13:38:10	17	1	NOSTIM	90	1	0
ISONEW	2015-05-19	13:38:10	26	2	NOSTIM	90	2	0
ISONEW	2015-05-19	13:38:10	27	3	NOSTIM	90	3	0
ISONEW	2015-05-19	13:38:10	20	4	NOSTIM	90	4	3
ISONEW	2015-05-19	13:38:10	53	5	NOSTIM	90	5	7
ISONEW	2015-05-19	13:38:10	54	1	NOSTIM	90	6	0
ISONEW	2015-05-19	13:38:10	47	2	NOSTIM	90	7	0
ISONEW	2015-05-19	13:38:10	33	3	NOSTIM	90	8	3
ISONEW	2015-05-19	13:38:10	17	1	P120	91	1	904
ISONEW	2015-05-19	13:38:10	26	2	P120	91	2	73
ISONEW	2015-05-19	13:38:10	27	3	P120	91	3	295
ISONEW	2015-05-19	13:38:10	20	4	P120	91	4	314
ISONEW	2015-05-19	13:38:10	53	5	P120	91	5	125
ISONEW	2015-05-19	13:38:10	54	1	P120	91	6	406
ISONEW	2015-05-19	13:38:10	47	2	P120	91	7	187
ISONEW	2015-05-19	13:38:10	33	3	P120	91	8	65
ISONEW	2015-05-19	13:38:10	17	1	NOSTIM	92	1	0
ISONEW	2015-05-19	13:38:10	26	2	NOSTIM	92	2	0
ISONEW	2015-05-19	13:38:10	27	3	NOSTIM	92	3	0
ISONEW	2015-05-19	13:38:10	20	4	NOSTIM	92	4	2
ISONEW	2015-05-19	13:38:10	53	5	NOSTIM	92	5	0
ISONEW	2015-05-19	13:38:10	54	1	NOSTIM	92	6	0
ISONEW	2015-05-19	13:38:10	47	2	NOSTIM	92	7	0
ISONEW	2015-05-19	13:38:10	33	3	NOSTIM	92	8	0
ISONEW	2015-05-19	13:38:10	17	1	PP3P120	93	1	88
ISONEW	2015-05-19	13:38:10	26	2	PP3P120	93	2	40
ISONEW	2015-05-19	13:38:10	27	3	PP3P120	93	3	166
ISONEW	2015-05-19	13:38:10	20	4	PP3P120	93	4	264
ISONEW	2015-05-19	13:38:10	53	5	PP3P120	93	5	58
ISONEW	2015-05-19	13:38:10	54	1	PP3P120	93	6	17
ISONEW	2015-05-19	13:38:10	47	2	PP3P120	93	7	84
ISONEW	2015-05-19	13:38:10	33	3	PP3P120	93	8	35
ISONEW	2015-05-19	13:38:10	17	1	NOSTIM	94	1	0
ISONEW	2015-05-19	13:38:10	26	2	NOSTIM	94	2	0
ISONEW	2015-05-19	13:38:10	27	3	NOSTIM	94	3	0
ISONEW	2015-05-19	13:38:10	20	4	NOSTIM	94	4	0
ISONEW	2015-05-19	13:38:10	53	5	NOSTIM	94	5	0
ISONEW	2015-05-19	13:38:10	54	1	NOSTIM	94	6	0
ISONEW	2015-05-19	13:38:10	47	2	NOSTIM	94	7	3
ISONEW	2015-05-19	13:38:10	33	3	NOSTIM	94	8	0
ISONEW	2015-05-19	13:38:10	17	1	PP12P120	95	1	30
ISONEW	2015-05-19	13:38:10	26	2	PP12P120	95	2	38
ISONEW	2015-05-19	13:38:10	27	3	PP12P120	95	3	105
ISONEW	2015-05-19	13:38:10	20	4	PP12P120	95	4	55
ISONEW	2015-05-19	13:38:10	53	5	PP12P120	95	5	0
ISONEW	2015-05-19	13:38:10	54	1	PP12P120	95	6	6
ISONEW	2015-05-19	13:38:10	47	2	PP12P120	95	7	34
ISONEW	2015-05-19	13:38:10	33	3	PP12P120	95	8	41
ISONEW	2015-05-19	13:38:10	17	1	NOSTIM	96	1	0
ISONEW	2015-05-19	13:38:10	26	2	NOSTIM	96	2	0
ISONEW	2015-05-19	13:38:10	27	3	NOSTIM	96	3	0
ISONEW	2015-05-19	13:38:10	20	4	NOSTIM	96	4	14
ISONEW	2015-05-19	13:38:10	53	5	NOSTIM	96	5	0
ISONEW	2015-05-19	13:38:10	54	1	NOSTIM	96	6	0
ISONEW	2015-05-19	13:38:10	47	2	NOSTIM	96	7	0
ISONEW	2015-05-19	13:38:10	33	3	NOSTIM	96	8	2
ISONEW	2015-05-19	13:38:10	17	1	PP6P120	97	1	45
ISONEW	2015-05-19	13:38:10	26	2	PP6P120	97	2	86
ISONEW	2015-05-19	13:38:10	27	3	PP6P120	97	3	180
ISONEW	2015-05-19	13:38:10	20	4	PP6P120	97	4	89
ISONEW	2015-05-19	13:38:10	53	5	PP6P120	97	5	28
ISONEW	2015-05-19	13:38:10	54	1	PP6P120	97	6	3
ISONEW	2015-05-19	13:38:10	47	2	PP6P120	97	7	148
ISONEW	2015-05-19	13:38:10	33	3	PP6P120	97	8	226
ISONEW	2015-05-19	13:38:10	17	1	NOSTIM	98	1	0
ISONEW	2015-05-19	13:38:10	26	2	NOSTIM	98	2	0
ISONEW	2015-05-19	13:38:10	27	3	NOSTIM	98	3	0
ISONEW	2015-05-19	13:38:10	20	4	NOSTIM	98	4	0
ISONEW	2015-05-19	13:38:10	53	5	NOSTIM	98	5	0
ISONEW	2015-05-19	13:38:10	54	1	NOSTIM	98	6	0
ISONEW	2015-05-19	13:38:10	47	2	NOSTIM	98	7	0
ISONEW	2015-05-19	13:38:10	33	3	NOSTIM	98	8	0
ISONEW	2015-05-19	13:38:10	17	1	P120	99	1	148
ISONEW	2015-05-19	13:38:10	26	2	P120	99	2	235
ISONEW	2015-05-19	13:38:10	27	3	P120	99	3	285
ISONEW	2015-05-19	13:38:10	20	4	P120	99	4	271
ISONEW	2015-05-19	13:38:10	53	5	P120	99	5	207
ISONEW	2015-05-19	13:38:10	54	1	P120	99	6	192
ISONEW	2015-05-19	13:38:10	47	2	P120	99	7	145
ISONEW	2015-05-19	13:38:10	33	3	P120	99	8	176
ISONEW	2015-05-19	13:38:10	17	1	NOSTIM	100	1	0
ISONEW	2015-05-19	13:38:10	26	2	NOSTIM	100	2	0
ISONEW	2015-05-19	13:38:10	27	3	NOSTIM	100	3	0
ISONEW	2015-05-19	13:38:10	20	4	NOSTIM	100	4	27
ISONEW	2015-05-19	13:38:10	53	5	NOSTIM	100	5	0
ISONEW	2015-05-19	13:38:10	54	1	NOSTIM	100	6	0
ISONEW	2015-05-19	13:38:10	47	2	NOSTIM	100	7	0
ISONEW	2015-05-19	13:38:10	33	3	NOSTIM	100	8	70
ISONEW	2015-05-19	13:38:10	17	1	PP3P120	101	1	113
ISONEW	2015-05-19	13:38:10	26	2	PP3P120	101	2	136
ISONEW	2015-05-19	13:38:10	27	3	PP3P120	101	3	182
ISONEW	2015-05-19	13:38:10	20	4	PP3P120	101	4	551
ISONEW	2015-05-19	13:38:10	53	5	PP3P120	101	5	49
ISONEW	2015-05-19	13:38:10	54	1	PP3P120	101	6	14
ISONEW	2015-05-19	13:38:10	47	2	PP3P120	101	7	119
ISONEW	2015-05-19	13:38:10	33	3	PP3P120	101	8	283
ISONEW	2015-05-19	13:38:10	17	1	NOSTIM	102	1	0
ISONEW	2015-05-19	13:38:10	26	2	NOSTIM	102	2	0
ISONEW	2015-05-19	13:38:10	27	3	NOSTIM	102	3	0
ISONEW	2015-05-19	13:38:10	20	4	NOSTIM	102	4	1
ISONEW	2015-05-19	13:38:10	53	5	NOSTIM	102	5	0
ISONEW	2015-05-19	13:38:10	54	1	NOSTIM	102	6	0
ISONEW	2015-05-19	13:38:10	47	2	NOSTIM	102	7	0
ISONEW	2015-05-19	13:38:10	33	3	NOSTIM	102	8	0
ISONEW	2015-05-19	13:38:10	17	1	PP12P120	103	1	21
ISONEW	2015-05-19	13:38:10	26	2	PP12P120	103	2	77
ISONEW	2015-05-19	13:38:10	27	3	PP12P120	103	3	78
ISONEW	2015-05-19	13:38:10	20	4	PP12P120	103	4	399
ISONEW	2015-05-19	13:38:10	53	5	PP12P120	103	5	11
ISONEW	2015-05-19	13:38:10	54	1	PP12P120	103	6	5
ISONEW	2015-05-19	13:38:10	47	2	PP12P120	103	7	77
ISONEW	2015-05-19	13:38:10	33	3	PP12P120	103	8	224
ISONEW	2015-05-19	13:38:10	17	1	NOSTIM	104	1	0
ISONEW	2015-05-19	13:38:10	26	2	NOSTIM	104	2	0
ISONEW	2015-05-19	13:38:10	27	3	NOSTIM	104	3	0
ISONEW	2015-05-19	13:38:10	20	4	NOSTIM	104	4	0
ISONEW	2015-05-19	13:38:10	53	5	NOSTIM	104	5	0
ISONEW	2015-05-19	13:38:10	54	1	NOSTIM	104	6	0
ISONEW	2015-05-19	13:38:10	47	2	NOSTIM	104	7	0
ISONEW	2015-05-19	13:38:10	33	3	NOSTIM	104	8	0
ISONEW	2015-05-19	13:38:10	17	1	P120	105	1	242
ISONEW	2015-05-19	13:38:10	26	2	P120	105	2	44
ISONEW	2015-05-19	13:38:10	27	3	P120	105	3	536
ISONEW	2015-05-19	13:38:10	20	4	P120	105	4	259
ISONEW	2015-05-19	13:38:10	53	5	P120	105	5	60
ISONEW	2015-05-19	13:38:10	54	1	P120	105	6	80
ISONEW	2015-05-19	13:38:10	47	2	P120	105	7	157
ISONEW	2015-05-19	13:38:10	33	3	P120	105	8	224
ISONEW	2015-05-19	13:38:10	17	1	NOSTIM	106	1	0
ISONEW	2015-05-19	13:38:10	26	2	NOSTIM	106	2	0
ISONEW	2015-05-19	13:38:10	27	3	NOSTIM	106	3	0
ISONEW	2015-05-19	13:38:10	20	4	NOSTIM	106	4	0
ISONEW	2015-05-19	13:38:10	53	5	NOSTIM	106	5	0
ISONEW	2015-05-19	13:38:10	54	1	NOSTIM	106	6	0
ISONEW	2015-05-19	13:38:10	47	2	NOSTIM	106	7	0
ISONEW	2015-05-19	13:38:10	33	3	NOSTIM	106	8	0
ISONEW	2015-05-19	13:38:10	17	1	PP6P120	107	1	74
ISONEW	2015-05-19	13:38:10	26	2	PP6P120	107	2	80
ISONEW	2015-05-19	13:38:10	27	3	PP6P120	107	3	177
ISONEW	2015-05-19	13:38:10	20	4	PP6P120	107	4	90
ISONEW	2015-05-19	13:38:10	53	5	PP6P120	107	5	15
ISONEW	2015-05-19	13:38:10	54	1	PP6P120	107	6	327
ISONEW	2015-05-19	13:38:10	47	2	PP6P120	107	7	213
ISONEW	2015-05-19	13:38:10	33	3	PP6P120	107	8	37
ISONEW	2015-05-19	13:38:10	17	1	NOSTIM	108	1	0
ISONEW	2015-05-19	13:38:10	26	2	NOSTIM	108	2	0
ISONEW	2015-05-19	13:38:10	27	3	NOSTIM	108	3	0
ISONEW	2015-05-19	13:38:10	20	4	NOSTIM	108	4	4
ISONEW	2015-05-19	13:38:10	53	5	NOSTIM	108	5	0
ISONEW	2015-05-19	13:38:10	54	1	NOSTIM	108	6	0
ISONEW	2015-05-19	13:38:10	47	2	NOSTIM	108	7	0
ISONEW	2015-05-19	13:38:10	33	3	NOSTIM	108	8	0
ISONEW	2015-05-19	13:38:10	17	1	P120	109	1	744
ISONEW	2015-05-19	13:38:10	26	2	P120	109	2	142
ISONEW	2015-05-19	13:38:10	27	3	P120	109	3	416
ISONEW	2015-05-19	13:38:10	20	4	P120	109	4	391
ISONEW	2015-05-19	13:38:10	53	5	P120	109	5	39
ISONEW	2015-05-19	13:38:10	54	1	P120	109	6	130
ISONEW	2015-05-19	13:38:10	47	2	P120	109	7	236
ISONEW	2015-05-19	13:38:10	33	3	P120	109	8	244
ISONEW	2015-05-19	13:38:10	17	1	NOSTIM	110	1	0
ISONEW	2015-05-19	13:38:10	26	2	NOSTIM	110	2	0
ISONEW	2015-05-19	13:38:10	27	3	NOSTIM	110	3	0
ISONEW	2015-05-19	13:38:10	20	4	NOSTIM	110	4	0
ISONEW	2015-05-19	13:38:10	53	5	NOSTIM	110	5	0
ISONEW	2015-05-19	13:38:10	54	1	NOSTIM	110	6	0
ISONEW	2015-05-19	13:38:10	47	2	NOSTIM	110	7	0
ISONEW	2015-05-19	13:38:10	33	3	NOSTIM	110	8	0
ISONEW	2015-05-19	13:38:10	17	1	P120	111	1	527
ISONEW	2015-05-19	13:38:10	26	2	P120	111	2	34
ISONEW	2015-05-19	13:38:10	27	3	P120	111	3	410
ISONEW	2015-05-19	13:38:10	20	4	P120	111	4	1121
ISONEW	2015-05-19	13:38:10	53	5	P120	111	5	39
ISONEW	2015-05-19	13:38:10	54	1	P120	111	6	1
ISONEW	2015-05-19	13:38:10	47	2	P120	111	7	131
ISONEW	2015-05-19	13:38:10	33	3	P120	111	8	64
ISONEW	2015-05-19	13:38:10	17	1	NOSTIM	112	1	0
ISONEW	2015-05-19	13:38:10	26	2	NOSTIM	112	2	0
ISONEW	2015-05-19	13:38:10	27	3	NOSTIM	112	3	0
ISONEW	2015-05-19	13:38:10	20	4	NOSTIM	112	4	1
ISONEW	2015-05-19	13:38:10	53	5	NOSTIM	112	5	0
ISONEW	2015-05-19	13:38:10	54	1	NOSTIM	112	6	0
ISONEW	2015-05-19	13:38:10	47	2	NOSTIM	112	7	2
ISONEW	2015-05-19	13:38:10	33	3	NOSTIM	112	8	0
ISONEW	2015-05-19	13:38:10	17	1	P120	113	1	178
ISONEW	2015-05-19	13:38:10	26	2	P120	113	2	308
ISONEW	2015-05-19	13:38:10	27	3	P120	113	3	267
ISONEW	2015-05-19	13:38:10	20	4	P120	113	4	113
ISONEW	2015-05-19	13:38:10	53	5	P120	113	5	19
ISONEW	2015-05-19	13:38:10	54	1	P120	113	6	24
ISONEW	2015-05-19	13:38:10	47	2	P120	113	7	200
ISONEW	2015-05-19	13:38:10	33	3	P120	113	8	13
ISONEW	2015-05-19	13:38:10	17	1	NOSTIM	114	1	0
ISONEW	2015-05-19	13:38:10	26	2	NOSTIM	114	2	0
ISONEW	2015-05-19	13:38:10	27	3	NOSTIM	114	3	0
ISONEW	2015-05-19	13:38:10	20	4	NOSTIM	114	4	0
ISONEW	2015-05-19	13:38:10	53	5	NOSTIM	114	5	0
ISONEW	2015-05-19	13:38:10	54	1	NOSTIM	114	6	1
ISONEW	2015-05-19	13:38:10	47	2	NOSTIM	114	7	0
ISONEW	2015-05-19	13:38:10	33	3	NOSTIM	114	8	0
ISONEW	2015-05-19	13:38:10	17	1	P120	115	1	530
ISONEW	2015-05-19	13:38:10	26	2	P120	115	2	179
ISONEW	2015-05-19	13:38:10	27	3	P120	115	3	483
ISONEW	2015-05-19	13:38:10	20	4	P120	115	4	272
ISONEW	2015-05-19	13:38:10	53	5	P120	115	5	54
ISONEW	2015-05-19	13:38:10	54	1	P120	115	6	319
ISONEW	2015-05-19	13:38:10	47	2	P120	115	7	103
ISONEW	2015-05-19	13:38:10	33	3	P120	115	8	103
ISONEW	2015-05-19	13:38:10	17	1	NOSTIM	116	1	0
ISONEW	2015-05-19	13:38:10	26	2	NOSTIM	116	2	0
ISONEW	2015-05-19	13:38:10	27	3	NOSTIM	116	3	0
ISONEW	2015-05-19	13:38:10	20	4	NOSTIM	116	4	0
ISONEW	2015-05-19	13:38:10	53	5	NOSTIM	116	5	0
ISONEW	2015-05-19	13:38:10	54	1	NOSTIM	116	6	0
ISONEW	2015-05-19	13:38:10	47	2	NOSTIM	116	7	0
ISONEW	2015-05-19	13:38:10	33	3	NOSTIM	116	8	0
ISONEW	2015-05-19	13:38:10	17	1	P120	117	1	864
ISONEW	2015-05-19	13:38:10	26	2	P120	117	2	303
ISONEW	2015-05-19	13:38:10	27	3	P120	117	3	462
ISONEW	2015-05-19	13:38:10	20	4	P120	117	4	143
ISONEW	2015-05-19	13:38:10	53	5	P120	117	5	87
ISONEW	2015-05-19	13:38:10	54	1	P120	117	6	64
ISONEW	2015-05-19	13:38:10	47	2	P120	117	7	131
ISONEW	2015-05-19	13:38:10	33	3	P120	117	8	22
ISONEW	2015-05-19	13:38:10	17	1	NOSTIM	118	1	0
ISONEW	2015-05-19	13:38:10	26	2	NOSTIM	118	2	2
ISONEW	2015-05-19	13:38:10	27	3	NOSTIM	118	3	0
ISONEW	2015-05-19	13:38:10	20	4	NOSTIM	118	4	0
ISONEW	2015-05-19	13:38:10	53	5	NOSTIM	118	5	0
ISONEW	2015-05-19	13:38:10	54	1	NOSTIM	118	6	0
ISONEW	2015-05-19	13:38:10	47	2	NOSTIM	118	7	0
ISONEW	2015-05-19	13:38:10	33	3	NOSTIM	118	8	0
ISONEW	2015-05-19	13:38:10	17	1	P120	119	1	389
ISONEW	2015-05-19	13:38:10	26	2	P120	119	2	320
ISONEW	2015-05-19	13:38:10	27	3	P120	119	3	325
ISONEW	2015-05-19	13:38:10	20	4	P120	119	4	295
ISONEW	2015-05-19	13:38:10	53	5	P120	119	5	87
ISONEW	2015-05-19	13:38:10	54	1	P120	119	6	34
ISONEW	2015-05-19	13:38:10	47	2	P120	119	7	174
ISONEW	2015-05-19	13:38:10	33	3	P120	119	8	385
ISONEW	2015-05-19	13:38:10	17	1	NOSTIM	120	1	0
ISONEW	2015-05-19	13:38:10	26	2	NOSTIM	120	2	0
ISONEW	2015-05-19	13:38:10	27	3	NOSTIM	120	3	0
ISONEW	2015-05-19	13:38:10	20	4	NOSTIM	120	4	0
ISONEW	2015-05-19	13:38:10	53	5	NOSTIM	120	5	0
ISONEW	2015-05-19	13:38:10	54	1	NOSTIM	120	6	0
ISONEW	2015-05-19	13:38:10	47	2	NOSTIM	120	7	0
ISONEW	2015-05-19	13:38:10	33	3	NOSTIM	120	8	1
ISONEW	2015-05-19	14:42:51	9	4	P120	1	1	660
ISONEW	2015-05-19	14:42:51	58	5	P120	1	2	567
ISONEW	2015-05-19	14:42:51	3	1	P120	1	3	1089
ISONEW	2015-05-19	14:42:51	60	2	P120	1	4	488
ISONEW	2015-05-19	14:42:51	13	3	P120	1	5	591
ISONEW	2015-05-19	14:42:51	46	4	P120	1	6	1694
ISONEW	2015-05-19	14:42:51	23	5	P120	1	7	666
ISONEW	2015-05-19	14:42:51	40	1	P120	1	8	2240
ISONEW	2015-05-19	14:42:51	9	4	NOSTIM	2	1	0
ISONEW	2015-05-19	14:42:51	58	5	NOSTIM	2	2	0
ISONEW	2015-05-19	14:42:51	3	1	NOSTIM	2	3	0
ISONEW	2015-05-19	14:42:51	60	2	NOSTIM	2	4	0
ISONEW	2015-05-19	14:42:51	13	3	NOSTIM	2	5	1
ISONEW	2015-05-19	14:42:51	46	4	NOSTIM	2	6	0
ISONEW	2015-05-19	14:42:51	23	5	NOSTIM	2	7	0
ISONEW	2015-05-19	14:42:51	40	1	NOSTIM	2	8	0
ISONEW	2015-05-19	14:42:51	9	4	P120	3	1	1053
ISONEW	2015-05-19	14:42:51	58	5	P120	3	2	930
ISONEW	2015-05-19	14:42:51	3	1	P120	3	3	954
ISONEW	2015-05-19	14:42:51	60	2	P120	3	4	176
ISONEW	2015-05-19	14:42:51	13	3	P120	3	5	2039
ISONEW	2015-05-19	14:42:51	46	4	P120	3	6	415
ISONEW	2015-05-19	14:42:51	23	5	P120	3	7	731
ISONEW	2015-05-19	14:42:51	40	1	P120	3	8	1485
ISONEW	2015-05-19	14:42:51	9	4	NOSTIM	4	1	0
ISONEW	2015-05-19	14:42:51	58	5	NOSTIM	4	2	0
ISONEW	2015-05-19	14:42:51	3	1	NOSTIM	4	3	0
ISONEW	2015-05-19	14:42:51	60	2	NOSTIM	4	4	3
ISONEW	2015-05-19	14:42:51	13	3	NOSTIM	4	5	4
ISONEW	2015-05-19	14:42:51	46	4	NOSTIM	4	6	0
ISONEW	2015-05-19	14:42:51	23	5	NOSTIM	4	7	0
ISONEW	2015-05-19	14:42:51	40	1	NOSTIM	4	8	0
ISONEW	2015-05-19	14:42:51	9	4	P120	5	1	1322
ISONEW	2015-05-19	14:42:51	58	5	P120	5	2	535
ISONEW	2015-05-19	14:42:51	3	1	P120	5	3	1072
ISONEW	2015-05-19	14:42:51	60	2	P120	5	4	201
ISONEW	2015-05-19	14:42:51	13	3	P120	5	5	1313
ISONEW	2015-05-19	14:42:51	46	4	P120	5	6	71
ISONEW	2015-05-19	14:42:51	23	5	P120	5	7	397
ISONEW	2015-05-19	14:42:51	40	1	P120	5	8	1552
ISONEW	2015-05-19	14:42:51	9	4	NOSTIM	6	1	0
ISONEW	2015-05-19	14:42:51	58	5	NOSTIM	6	2	0
ISONEW	2015-05-19	14:42:51	3	1	NOSTIM	6	3	0
ISONEW	2015-05-19	14:42:51	60	2	NOSTIM	6	4	0
ISONEW	2015-05-19	14:42:51	13	3	NOSTIM	6	5	0
ISONEW	2015-05-19	14:42:51	46	4	NOSTIM	6	6	0
ISONEW	2015-05-19	14:42:51	23	5	NOSTIM	6	7	0
ISONEW	2015-05-19	14:42:51	40	1	NOSTIM	6	8	0
ISONEW	2015-05-19	14:42:51	9	4	P120	7	1	1263
ISONEW	2015-05-19	14:42:51	58	5	P120	7	2	1366
ISONEW	2015-05-19	14:42:51	3	1	P120	7	3	353
ISONEW	2015-05-19	14:42:51	60	2	P120	7	4	193
ISONEW	2015-05-19	14:42:51	13	3	P120	7	5	2038
ISONEW	2015-05-19	14:42:51	46	4	P120	7	6	96
ISONEW	2015-05-19	14:42:51	23	5	P120	7	7	384
ISONEW	2015-05-19	14:42:51	40	1	P120	7	8	1972
ISONEW	2015-05-19	14:42:51	9	4	NOSTIM	8	1	0
ISONEW	2015-05-19	14:42:51	58	5	NOSTIM	8	2	0
ISONEW	2015-05-19	14:42:51	3	1	NOSTIM	8	3	0
ISONEW	2015-05-19	14:42:51	60	2	NOSTIM	8	4	0
ISONEW	2015-05-19	14:42:51	13	3	NOSTIM	8	5	0
ISONEW	2015-05-19	14:42:51	46	4	NOSTIM	8	6	0
ISONEW	2015-05-19	14:42:51	23	5	NOSTIM	8	7	0
ISONEW	2015-05-19	14:42:51	40	1	NOSTIM	8	8	0
ISONEW	2015-05-19	14:42:51	9	4	P120	9	1	1424
ISONEW	2015-05-19	14:42:51	58	5	P120	9	2	479
ISONEW	2015-05-19	14:42:51	3	1	P120	9	3	531
ISONEW	2015-05-19	14:42:51	60	2	P120	9	4	208
ISONEW	2015-05-19	14:42:51	13	3	P120	9	5	2049
ISONEW	2015-05-19	14:42:51	46	4	P120	9	6	48
ISONEW	2015-05-19	14:42:51	23	5	P120	9	7	206
ISONEW	2015-05-19	14:42:51	40	1	P120	9	8	1667
ISONEW	2015-05-19	14:42:51	9	4	NOSTIM	10	1	1
ISONEW	2015-05-19	14:42:51	58	5	NOSTIM	10	2	0
ISONEW	2015-05-19	14:42:51	3	1	NOSTIM	10	3	0
ISONEW	2015-05-19	14:42:51	60	2	NOSTIM	10	4	0
ISONEW	2015-05-19	14:42:51	13	3	NOSTIM	10	5	0
ISONEW	2015-05-19	14:42:51	46	4	NOSTIM	10	6	0
ISONEW	2015-05-19	14:42:51	23	5	NOSTIM	10	7	0
ISONEW	2015-05-19	14:42:51	40	1	NOSTIM	10	8	0
ISONEW	2015-05-19	14:42:51	9	4	P120	11	1	298
ISONEW	2015-05-19	14:42:51	58	5	P120	11	2	687
ISONEW	2015-05-19	14:42:51	3	1	P120	11	3	551
ISONEW	2015-05-19	14:42:51	60	2	P120	11	4	176
ISONEW	2015-05-19	14:42:51	13	3	P120	11	5	1849
ISONEW	2015-05-19	14:42:51	46	4	P120	11	6	203
ISONEW	2015-05-19	14:42:51	23	5	P120	11	7	575
ISONEW	2015-05-19	14:42:51	40	1	P120	11	8	1679
ISONEW	2015-05-19	14:42:51	9	4	NOSTIM	12	1	0
ISONEW	2015-05-19	14:42:51	58	5	NOSTIM	12	2	0
ISONEW	2015-05-19	14:42:51	3	1	NOSTIM	12	3	0
ISONEW	2015-05-19	14:42:51	60	2	NOSTIM	12	4	0
ISONEW	2015-05-19	14:42:51	13	3	NOSTIM	12	5	0
ISONEW	2015-05-19	14:42:51	46	4	NOSTIM	12	6	0
ISONEW	2015-05-19	14:42:51	23	5	NOSTIM	12	7	0
ISONEW	2015-05-19	14:42:51	40	1	NOSTIM	12	8	0
ISONEW	2015-05-19	14:42:51	9	4	PP6P120	13	1	173
ISONEW	2015-05-19	14:42:51	58	5	PP6P120	13	2	104
ISONEW	2015-05-19	14:42:51	3	1	PP6P120	13	3	128
ISONEW	2015-05-19	14:42:51	60	2	PP6P120	13	4	44
ISONEW	2015-05-19	14:42:51	13	3	PP6P120	13	5	1415
ISONEW	2015-05-19	14:42:51	46	4	PP6P120	13	6	4
ISONEW	2015-05-19	14:42:51	23	5	PP6P120	13	7	53
ISONEW	2015-05-19	14:42:51	40	1	PP6P120	13	8	507
ISONEW	2015-05-19	14:42:51	9	4	NOSTIM	14	1	0
ISONEW	2015-05-19	14:42:51	58	5	NOSTIM	14	2	0
ISONEW	2015-05-19	14:42:51	3	1	NOSTIM	14	3	0
ISONEW	2015-05-19	14:42:51	60	2	NOSTIM	14	4	0
ISONEW	2015-05-19	14:42:51	13	3	NOSTIM	14	5	2
ISONEW	2015-05-19	14:42:51	46	4	NOSTIM	14	6	0
ISONEW	2015-05-19	14:42:51	23	5	NOSTIM	14	7	0
ISONEW	2015-05-19	14:42:51	40	1	NOSTIM	14	8	0
ISONEW	2015-05-19	14:42:51	9	4	PP12P120	15	1	63
ISONEW	2015-05-19	14:42:51	58	5	PP12P120	15	2	91
ISONEW	2015-05-19	14:42:51	3	1	PP12P120	15	3	16
ISONEW	2015-05-19	14:42:51	60	2	PP12P120	15	4	4
ISONEW	2015-05-19	14:42:51	13	3	PP12P120	15	5	103
ISONEW	2015-05-19	14:42:51	46	4	PP12P120	15	6	6
ISONEW	2015-05-19	14:42:51	23	5	PP12P120	15	7	1
ISONEW	2015-05-19	14:42:51	40	1	PP12P120	15	8	66
ISONEW	2015-05-19	14:42:51	9	4	NOSTIM	16	1	0
ISONEW	2015-05-19	14:42:51	58	5	NOSTIM	16	2	0
ISONEW	2015-05-19	14:42:51	3	1	NOSTIM	16	3	0
ISONEW	2015-05-19	14:42:51	60	2	NOSTIM	16	4	0
ISONEW	2015-05-19	14:42:51	13	3	NOSTIM	16	5	0
ISONEW	2015-05-19	14:42:51	46	4	NOSTIM	16	6	0
ISONEW	2015-05-19	14:42:51	23	5	NOSTIM	16	7	0
ISONEW	2015-05-19	14:42:51	40	1	NOSTIM	16	8	0
ISONEW	2015-05-19	14:42:51	9	4	PP3P120	17	1	89
ISONEW	2015-05-19	14:42:51	58	5	PP3P120	17	2	105
ISONEW	2015-05-19	14:42:51	3	1	PP3P120	17	3	242
ISONEW	2015-05-19	14:42:51	60	2	PP3P120	17	4	47
ISONEW	2015-05-19	14:42:51	13	3	PP3P120	17	5	1135
ISONEW	2015-05-19	14:42:51	46	4	PP3P120	17	6	11
ISONEW	2015-05-19	14:42:51	23	5	PP3P120	17	7	60
ISONEW	2015-05-19	14:42:51	40	1	PP3P120	17	8	516
ISONEW	2015-05-19	14:42:51	9	4	NOSTIM	18	1	0
ISONEW	2015-05-19	14:42:51	58	5	NOSTIM	18	2	0
ISONEW	2015-05-19	14:42:51	3	1	NOSTIM	18	3	0
ISONEW	2015-05-19	14:42:51	60	2	NOSTIM	18	4	2
ISONEW	2015-05-19	14:42:51	13	3	NOSTIM	18	5	0
ISONEW	2015-05-19	14:42:51	46	4	NOSTIM	18	6	0
ISONEW	2015-05-19	14:42:51	23	5	NOSTIM	18	7	0
ISONEW	2015-05-19	14:42:51	40	1	NOSTIM	18	8	0
ISONEW	2015-05-19	14:42:51	9	4	P120	19	1	270
ISONEW	2015-05-19	14:42:51	58	5	P120	19	2	1149
ISONEW	2015-05-19	14:42:51	3	1	P120	19	3	384
ISONEW	2015-05-19	14:42:51	60	2	P120	19	4	77
ISONEW	2015-05-19	14:42:51	13	3	P120	19	5	1227
ISONEW	2015-05-19	14:42:51	46	4	P120	19	6	92
ISONEW	2015-05-19	14:42:51	23	5	P120	19	7	582
ISONEW	2015-05-19	14:42:51	40	1	P120	19	8	88
ISONEW	2015-05-19	14:42:51	9	4	NOSTIM	20	1	0
ISONEW	2015-05-19	14:42:51	58	5	NOSTIM	20	2	0
ISONEW	2015-05-19	14:42:51	3	1	NOSTIM	20	3	0
ISONEW	2015-05-19	14:42:51	60	2	NOSTIM	20	4	0
ISONEW	2015-05-19	14:42:51	13	3	NOSTIM	20	5	0
ISONEW	2015-05-19	14:42:51	46	4	NOSTIM	20	6	0
ISONEW	2015-05-19	14:42:51	23	5	NOSTIM	20	7	0
ISONEW	2015-05-19	14:42:51	40	1	NOSTIM	20	8	0
ISONEW	2015-05-19	14:42:51	9	4	PP6P120	21	1	36
ISONEW	2015-05-19	14:42:51	58	5	PP6P120	21	2	132
ISONEW	2015-05-19	14:42:51	3	1	PP6P120	21	3	98
ISONEW	2015-05-19	14:42:51	60	2	PP6P120	21	4	6
ISONEW	2015-05-19	14:42:51	13	3	PP6P120	21	5	981
ISONEW	2015-05-19	14:42:51	46	4	PP6P120	21	6	16
ISONEW	2015-05-19	14:42:51	23	5	PP6P120	21	7	10
ISONEW	2015-05-19	14:42:51	40	1	PP6P120	21	8	154
ISONEW	2015-05-19	14:42:51	9	4	NOSTIM	22	1	0
ISONEW	2015-05-19	14:42:51	58	5	NOSTIM	22	2	0
ISONEW	2015-05-19	14:42:51	3	1	NOSTIM	22	3	0
ISONEW	2015-05-19	14:42:51	60	2	NOSTIM	22	4	0
ISONEW	2015-05-19	14:42:51	13	3	NOSTIM	22	5	0
ISONEW	2015-05-19	14:42:51	46	4	NOSTIM	22	6	0
ISONEW	2015-05-19	14:42:51	23	5	NOSTIM	22	7	0
ISONEW	2015-05-19	14:42:51	40	1	NOSTIM	22	8	0
ISONEW	2015-05-19	14:42:51	9	4	PP3P120	23	1	59
ISONEW	2015-05-19	14:42:51	58	5	PP3P120	23	2	265
ISONEW	2015-05-19	14:42:51	3	1	PP3P120	23	3	88
ISONEW	2015-05-19	14:42:51	60	2	PP3P120	23	4	22
ISONEW	2015-05-19	14:42:51	13	3	PP3P120	23	5	417
ISONEW	2015-05-19	14:42:51	46	4	PP3P120	23	6	23
ISONEW	2015-05-19	14:42:51	23	5	PP3P120	23	7	115
ISONEW	2015-05-19	14:42:51	40	1	PP3P120	23	8	284
ISONEW	2015-05-19	14:42:51	9	4	NOSTIM	24	1	0
ISONEW	2015-05-19	14:42:51	58	5	NOSTIM	24	2	0
ISONEW	2015-05-19	14:42:51	3	1	NOSTIM	24	3	0
ISONEW	2015-05-19	14:42:51	60	2	NOSTIM	24	4	0
ISONEW	2015-05-19	14:42:51	13	3	NOSTIM	24	5	0
ISONEW	2015-05-19	14:42:51	46	4	NOSTIM	24	6	0
ISONEW	2015-05-19	14:42:51	23	5	NOSTIM	24	7	0
ISONEW	2015-05-19	14:42:51	40	1	NOSTIM	24	8	0
ISONEW	2015-05-19	14:42:51	9	4	PP6P120	25	1	18
ISONEW	2015-05-19	14:42:51	58	5	PP6P120	25	2	116
ISONEW	2015-05-19	14:42:51	3	1	PP6P120	25	3	108
ISONEW	2015-05-19	14:42:51	60	2	PP6P120	25	4	25
ISONEW	2015-05-19	14:42:51	13	3	PP6P120	25	5	330
ISONEW	2015-05-19	14:42:51	46	4	PP6P120	25	6	8
ISONEW	2015-05-19	14:42:51	23	5	PP6P120	25	7	9
ISONEW	2015-05-19	14:42:51	40	1	PP6P120	25	8	321
ISONEW	2015-05-19	14:42:51	9	4	NOSTIM	26	1	0
ISONEW	2015-05-19	14:42:51	58	5	NOSTIM	26	2	0
ISONEW	2015-05-19	14:42:51	3	1	NOSTIM	26	3	0
ISONEW	2015-05-19	14:42:51	60	2	NOSTIM	26	4	4
ISONEW	2015-05-19	14:42:51	13	3	NOSTIM	26	5	0
ISONEW	2015-05-19	14:42:51	46	4	NOSTIM	26	6	0
ISONEW	2015-05-19	14:42:51	23	5	NOSTIM	26	7	0
ISONEW	2015-05-19	14:42:51	40	1	NOSTIM	26	8	0
ISONEW	2015-05-19	14:42:51	9	4	P120	27	1	158
ISONEW	2015-05-19	14:42:51	58	5	P120	27	2	1046
ISONEW	2015-05-19	14:42:51	3	1	P120	27	3	380
ISONEW	2015-05-19	14:42:51	60	2	P120	27	4	92
ISONEW	2015-05-19	14:42:51	13	3	P120	27	5	1379
ISONEW	2015-05-19	14:42:51	46	4	P120	27	6	83
ISONEW	2015-05-19	14:42:51	23	5	P120	27	7	176
ISONEW	2015-05-19	14:42:51	40	1	P120	27	8	1036
ISONEW	2015-05-19	14:42:51	9	4	NOSTIM	28	1	0
ISONEW	2015-05-19	14:42:51	58	5	NOSTIM	28	2	0
ISONEW	2015-05-19	14:42:51	3	1	NOSTIM	28	3	0
ISONEW	2015-05-19	14:42:51	60	2	NOSTIM	28	4	0
ISONEW	2015-05-19	14:42:51	13	3	NOSTIM	28	5	0
ISONEW	2015-05-19	14:42:51	46	4	NOSTIM	28	6	0
ISONEW	2015-05-19	14:42:51	23	5	NOSTIM	28	7	0
ISONEW	2015-05-19	14:42:51	40	1	NOSTIM	28	8	0
ISONEW	2015-05-19	14:42:51	9	4	PP12P120	29	1	146
ISONEW	2015-05-19	14:42:51	58	5	PP12P120	29	2	5
ISONEW	2015-05-19	14:42:51	3	1	PP12P120	29	3	50
ISONEW	2015-05-19	14:42:51	60	2	PP12P120	29	4	3
ISONEW	2015-05-19	14:42:51	13	3	PP12P120	29	5	214
ISONEW	2015-05-19	14:42:51	46	4	PP12P120	29	6	5
ISONEW	2015-05-19	14:42:51	23	5	PP12P120	29	7	2
ISONEW	2015-05-19	14:42:51	40	1	PP12P120	29	8	105
ISONEW	2015-05-19	14:42:51	9	4	NOSTIM	30	1	0
ISONEW	2015-05-19	14:42:51	58	5	NOSTIM	30	2	0
ISONEW	2015-05-19	14:42:51	3	1	NOSTIM	30	3	0
ISONEW	2015-05-19	14:42:51	60	2	NOSTIM	30	4	0
ISONEW	2015-05-19	14:42:51	13	3	NOSTIM	30	5	0
ISONEW	2015-05-19	14:42:51	46	4	NOSTIM	30	6	0
ISONEW	2015-05-19	14:42:51	23	5	NOSTIM	30	7	0
ISONEW	2015-05-19	14:42:51	40	1	NOSTIM	30	8	0
ISONEW	2015-05-19	14:42:51	9	4	P120	31	1	29
ISONEW	2015-05-19	14:42:51	58	5	P120	31	2	69
ISONEW	2015-05-19	14:42:51	3	1	P120	31	3	474
ISONEW	2015-05-19	14:42:51	60	2	P120	31	4	80
ISONEW	2015-05-19	14:42:51	13	3	P120	31	5	272
ISONEW	2015-05-19	14:42:51	46	4	P120	31	6	25
ISONEW	2015-05-19	14:42:51	23	5	P120	31	7	168
ISONEW	2015-05-19	14:42:51	40	1	P120	31	8	820
ISONEW	2015-05-19	14:42:51	9	4	NOSTIM	32	1	0
ISONEW	2015-05-19	14:42:51	58	5	NOSTIM	32	2	0
ISONEW	2015-05-19	14:42:51	3	1	NOSTIM	32	3	0
ISONEW	2015-05-19	14:42:51	60	2	NOSTIM	32	4	0
ISONEW	2015-05-19	14:42:51	13	3	NOSTIM	32	5	0
ISONEW	2015-05-19	14:42:51	46	4	NOSTIM	32	6	0
ISONEW	2015-05-19	14:42:51	23	5	NOSTIM	32	7	0
ISONEW	2015-05-19	14:42:51	40	1	NOSTIM	32	8	0
ISONEW	2015-05-19	14:42:51	9	4	PP3P120	33	1	32
ISONEW	2015-05-19	14:42:51	58	5	PP3P120	33	2	26
ISONEW	2015-05-19	14:42:51	3	1	PP3P120	33	3	312
ISONEW	2015-05-19	14:42:51	60	2	PP3P120	33	4	14
ISONEW	2015-05-19	14:42:51	13	3	PP3P120	33	5	582
ISONEW	2015-05-19	14:42:51	46	4	PP3P120	33	6	18
ISONEW	2015-05-19	14:42:51	23	5	PP3P120	33	7	22
ISONEW	2015-05-19	14:42:51	40	1	PP3P120	33	8	163
ISONEW	2015-05-19	14:42:51	9	4	NOSTIM	34	1	0
ISONEW	2015-05-19	14:42:51	58	5	NOSTIM	34	2	0
ISONEW	2015-05-19	14:42:51	3	1	NOSTIM	34	3	0
ISONEW	2015-05-19	14:42:51	60	2	NOSTIM	34	4	0
ISONEW	2015-05-19	14:42:51	13	3	NOSTIM	34	5	0
ISONEW	2015-05-19	14:42:51	46	4	NOSTIM	34	6	0
ISONEW	2015-05-19	14:42:51	23	5	NOSTIM	34	7	0
ISONEW	2015-05-19	14:42:51	40	1	NOSTIM	34	8	0
ISONEW	2015-05-19	14:42:51	9	4	PP12P120	35	1	29
ISONEW	2015-05-19	14:42:51	58	5	PP12P120	35	2	3
ISONEW	2015-05-19	14:42:51	3	1	PP12P120	35	3	55
ISONEW	2015-05-19	14:42:51	60	2	PP12P120	35	4	4
ISONEW	2015-05-19	14:42:51	13	3	PP12P120	35	5	147
ISONEW	2015-05-19	14:42:51	46	4	PP12P120	35	6	0
ISONEW	2015-05-19	14:42:51	23	5	PP12P120	35	7	2
ISONEW	2015-05-19	14:42:51	40	1	PP12P120	35	8	178
ISONEW	2015-05-19	14:42:51	9	4	NOSTIM	36	1	0
ISONEW	2015-05-19	14:42:51	58	5	NOSTIM	36	2	0
ISONEW	2015-05-19	14:42:51	3	1	NOSTIM	36	3	0
ISONEW	2015-05-19	14:42:51	60	2	NOSTIM	36	4	6
ISONEW	2015-05-19	14:42:51	13	3	NOSTIM	36	5	0
ISONEW	2015-05-19	14:42:51	46	4	NOSTIM	36	6	0
ISONEW	2015-05-19	14:42:51	23	5	NOSTIM	36	7	0
ISONEW	2015-05-19	14:42:51	40	1	NOSTIM	36	8	0
ISONEW	2015-05-19	14:42:51	9	4	PP3P120	37	1	23
ISONEW	2015-05-19	14:42:51	58	5	PP3P120	37	2	60
ISONEW	2015-05-19	14:42:51	3	1	PP3P120	37	3	150
ISONEW	2015-05-19	14:42:51	60	2	PP3P120	37	4	15
ISONEW	2015-05-19	14:42:51	13	3	PP3P120	37	5	366
ISONEW	2015-05-19	14:42:51	46	4	PP3P120	37	6	6
ISONEW	2015-05-19	14:42:51	23	5	PP3P120	37	7	30
ISONEW	2015-05-19	14:42:51	40	1	PP3P120	37	8	186
ISONEW	2015-05-19	14:42:51	9	4	NOSTIM	38	1	0
ISONEW	2015-05-19	14:42:51	58	5	NOSTIM	38	2	0
ISONEW	2015-05-19	14:42:51	3	1	NOSTIM	38	3	0
ISONEW	2015-05-19	14:42:51	60	2	NOSTIM	38	4	0
ISONEW	2015-05-19	14:42:51	13	3	NOSTIM	38	5	0
ISONEW	2015-05-19	14:42:51	46	4	NOSTIM	38	6	0
ISONEW	2015-05-19	14:42:51	23	5	NOSTIM	38	7	0
ISONEW	2015-05-19	14:42:51	40	1	NOSTIM	38	8	0
ISONEW	2015-05-19	14:42:51	9	4	PP12P120	39	1	26
ISONEW	2015-05-19	14:42:51	58	5	PP12P120	39	2	5
ISONEW	2015-05-19	14:42:51	3	1	PP12P120	39	3	60
ISONEW	2015-05-19	14:42:51	60	2	PP12P120	39	4	0
ISONEW	2015-05-19	14:42:51	13	3	PP12P120	39	5	320
ISONEW	2015-05-19	14:42:51	46	4	PP12P120	39	6	1
ISONEW	2015-05-19	14:42:51	23	5	PP12P120	39	7	6
ISONEW	2015-05-19	14:42:51	40	1	PP12P120	39	8	54
ISONEW	2015-05-19	14:42:51	9	4	NOSTIM	40	1	0
ISONEW	2015-05-19	14:42:51	58	5	NOSTIM	40	2	0
ISONEW	2015-05-19	14:42:51	3	1	NOSTIM	40	3	0
ISONEW	2015-05-19	14:42:51	60	2	NOSTIM	40	4	0
ISONEW	2015-05-19	14:42:51	13	3	NOSTIM	40	5	0
ISONEW	2015-05-19	14:42:51	46	4	NOSTIM	40	6	0
ISONEW	2015-05-19	14:42:51	23	5	NOSTIM	40	7	0
ISONEW	2015-05-19	14:42:51	40	1	NOSTIM	40	8	0
ISONEW	2015-05-19	14:42:51	9	4	PP6P120	41	1	53
ISONEW	2015-05-19	14:42:51	58	5	PP6P120	41	2	38
ISONEW	2015-05-19	14:42:51	3	1	PP6P120	41	3	147
ISONEW	2015-05-19	14:42:51	60	2	PP6P120	41	4	10
ISONEW	2015-05-19	14:42:51	13	3	PP6P120	41	5	421
ISONEW	2015-05-19	14:42:51	46	4	PP6P120	41	6	3
ISONEW	2015-05-19	14:42:51	23	5	PP6P120	41	7	6
ISONEW	2015-05-19	14:42:51	40	1	PP6P120	41	8	98
ISONEW	2015-05-19	14:42:51	9	4	NOSTIM	42	1	0
ISONEW	2015-05-19	14:42:51	58	5	NOSTIM	42	2	0
ISONEW	2015-05-19	14:42:51	3	1	NOSTIM	42	3	0
ISONEW	2015-05-19	14:42:51	60	2	NOSTIM	42	4	0
ISONEW	2015-05-19	14:42:51	13	3	NOSTIM	42	5	0
ISONEW	2015-05-19	14:42:51	46	4	NOSTIM	42	6	0
ISONEW	2015-05-19	14:42:51	23	5	NOSTIM	42	7	0
ISONEW	2015-05-19	14:42:51	40	1	NOSTIM	42	8	0
ISONEW	2015-05-19	14:42:51	9	4	P120	43	1	45
ISONEW	2015-05-19	14:42:51	58	5	P120	43	2	41
ISONEW	2015-05-19	14:42:51	3	1	P120	43	3	217
ISONEW	2015-05-19	14:42:51	60	2	P120	43	4	71
ISONEW	2015-05-19	14:42:51	13	3	P120	43	5	498
ISONEW	2015-05-19	14:42:51	46	4	P120	43	6	18
ISONEW	2015-05-19	14:42:51	23	5	P120	43	7	65
ISONEW	2015-05-19	14:42:51	40	1	P120	43	8	503
ISONEW	2015-05-19	14:42:51	9	4	NOSTIM	44	1	0
ISONEW	2015-05-19	14:42:51	58	5	NOSTIM	44	2	0
ISONEW	2015-05-19	14:42:51	3	1	NOSTIM	44	3	0
ISONEW	2015-05-19	14:42:51	60	2	NOSTIM	44	4	0
ISONEW	2015-05-19	14:42:51	13	3	NOSTIM	44	5	0
ISONEW	2015-05-19	14:42:51	46	4	NOSTIM	44	6	0
ISONEW	2015-05-19	14:42:51	23	5	NOSTIM	44	7	0
ISONEW	2015-05-19	14:42:51	40	1	NOSTIM	44	8	0
ISONEW	2015-05-19	14:42:51	9	4	PP3P120	45	1	31
ISONEW	2015-05-19	14:42:51	58	5	PP3P120	45	2	65
ISONEW	2015-05-19	14:42:51	3	1	PP3P120	45	3	113
ISONEW	2015-05-19	14:42:51	60	2	PP3P120	45	4	7
ISONEW	2015-05-19	14:42:51	13	3	PP3P120	45	5	331
ISONEW	2015-05-19	14:42:51	46	4	PP3P120	45	6	4
ISONEW	2015-05-19	14:42:51	23	5	PP3P120	45	7	38
ISONEW	2015-05-19	14:42:51	40	1	PP3P120	45	8	152
ISONEW	2015-05-19	14:42:51	9	4	NOSTIM	46	1	0
ISONEW	2015-05-19	14:42:51	58	5	NOSTIM	46	2	0
ISONEW	2015-05-19	14:42:51	3	1	NOSTIM	46	3	0
ISONEW	2015-05-19	14:42:51	60	2	NOSTIM	46	4	0
ISONEW	2015-05-19	14:42:51	13	3	NOSTIM	46	5	3
ISONEW	2015-05-19	14:42:51	46	4	NOSTIM	46	6	0
ISONEW	2015-05-19	14:42:51	23	5	NOSTIM	46	7	0
ISONEW	2015-05-19	14:42:51	40	1	NOSTIM	46	8	0
ISONEW	2015-05-19	14:42:51	9	4	PP12P120	47	1	46
ISONEW	2015-05-19	14:42:51	58	5	PP12P120	47	2	2
ISONEW	2015-05-19	14:42:51	3	1	PP12P120	47	3	135
ISONEW	2015-05-19	14:42:51	60	2	PP12P120	47	4	4
ISONEW	2015-05-19	14:42:51	13	3	PP12P120	47	5	25
ISONEW	2015-05-19	14:42:51	46	4	PP12P120	47	6	3
ISONEW	2015-05-19	14:42:51	23	5	PP12P120	47	7	9
ISONEW	2015-05-19	14:42:51	40	1	PP12P120	47	8	157
ISONEW	2015-05-19	14:42:51	9	4	NOSTIM	48	1	0
ISONEW	2015-05-19	14:42:51	58	5	NOSTIM	48	2	0
ISONEW	2015-05-19	14:42:51	3	1	NOSTIM	48	3	0
ISONEW	2015-05-19	14:42:51	60	2	NOSTIM	48	4	0
ISONEW	2015-05-19	14:42:51	13	3	NOSTIM	48	5	16
ISONEW	2015-05-19	14:42:51	46	4	NOSTIM	48	6	0
ISONEW	2015-05-19	14:42:51	23	5	NOSTIM	48	7	0
ISONEW	2015-05-19	14:42:51	40	1	NOSTIM	48	8	0
ISONEW	2015-05-19	14:42:51	9	4	PP6P120	49	1	22
ISONEW	2015-05-19	14:42:51	58	5	PP6P120	49	2	2
ISONEW	2015-05-19	14:42:51	3	1	PP6P120	49	3	51
ISONEW	2015-05-19	14:42:51	60	2	PP6P120	49	4	8
ISONEW	2015-05-19	14:42:51	13	3	PP6P120	49	5	147
ISONEW	2015-05-19	14:42:51	46	4	PP6P120	49	6	0
ISONEW	2015-05-19	14:42:51	23	5	PP6P120	49	7	8
ISONEW	2015-05-19	14:42:51	40	1	PP6P120	49	8	180
ISONEW	2015-05-19	14:42:51	9	4	NOSTIM	50	1	0
ISONEW	2015-05-19	14:42:51	58	5	NOSTIM	50	2	0
ISONEW	2015-05-19	14:42:51	3	1	NOSTIM	50	3	0
ISONEW	2015-05-19	14:42:51	60	2	NOSTIM	50	4	0
ISONEW	2015-05-19	14:42:51	13	3	NOSTIM	50	5	0
ISONEW	2015-05-19	14:42:51	46	4	NOSTIM	50	6	0
ISONEW	2015-05-19	14:42:51	23	5	NOSTIM	50	7	0
ISONEW	2015-05-19	14:42:51	40	1	NOSTIM	50	8	0
ISONEW	2015-05-19	14:42:51	9	4	P120	51	1	140
ISONEW	2015-05-19	14:42:51	58	5	P120	51	2	45
ISONEW	2015-05-19	14:42:51	3	1	P120	51	3	220
ISONEW	2015-05-19	14:42:51	60	2	P120	51	4	17
ISONEW	2015-05-19	14:42:51	13	3	P120	51	5	882
ISONEW	2015-05-19	14:42:51	46	4	P120	51	6	26
ISONEW	2015-05-19	14:42:51	23	5	P120	51	7	25
ISONEW	2015-05-19	14:42:51	40	1	P120	51	8	511
ISONEW	2015-05-19	14:42:51	9	4	NOSTIM	52	1	0
ISONEW	2015-05-19	14:42:51	58	5	NOSTIM	52	2	0
ISONEW	2015-05-19	14:42:51	3	1	NOSTIM	52	3	0
ISONEW	2015-05-19	14:42:51	60	2	NOSTIM	52	4	0
ISONEW	2015-05-19	14:42:51	13	3	NOSTIM	52	5	4
ISONEW	2015-05-19	14:42:51	46	4	NOSTIM	52	6	0
ISONEW	2015-05-19	14:42:51	23	5	NOSTIM	52	7	0
ISONEW	2015-05-19	14:42:51	40	1	NOSTIM	52	8	0
ISONEW	2015-05-19	14:42:51	9	4	PP3P120	53	1	61
ISONEW	2015-05-19	14:42:51	58	5	PP3P120	53	2	19
ISONEW	2015-05-19	14:42:51	3	1	PP3P120	53	3	105
ISONEW	2015-05-19	14:42:51	60	2	PP3P120	53	4	14
ISONEW	2015-05-19	14:42:51	13	3	PP3P120	53	5	578
ISONEW	2015-05-19	14:42:51	46	4	PP3P120	53	6	28
ISONEW	2015-05-19	14:42:51	23	5	PP3P120	53	7	57
ISONEW	2015-05-19	14:42:51	40	1	PP3P120	53	8	282
ISONEW	2015-05-19	14:42:51	9	4	NOSTIM	54	1	0
ISONEW	2015-05-19	14:42:51	58	5	NOSTIM	54	2	0
ISONEW	2015-05-19	14:42:51	3	1	NOSTIM	54	3	0
ISONEW	2015-05-19	14:42:51	60	2	NOSTIM	54	4	0
ISONEW	2015-05-19	14:42:51	13	3	NOSTIM	54	5	0
ISONEW	2015-05-19	14:42:51	46	4	NOSTIM	54	6	1
ISONEW	2015-05-19	14:42:51	23	5	NOSTIM	54	7	0
ISONEW	2015-05-19	14:42:51	40	1	NOSTIM	54	8	0
ISONEW	2015-05-19	14:42:51	9	4	PP12P120	55	1	32
ISONEW	2015-05-19	14:42:51	58	5	PP12P120	55	2	3
ISONEW	2015-05-19	14:42:51	3	1	PP12P120	55	3	59
ISONEW	2015-05-19	14:42:51	60	2	PP12P120	55	4	8
ISONEW	2015-05-19	14:42:51	13	3	PP12P120	55	5	344
ISONEW	2015-05-19	14:42:51	46	4	PP12P120	55	6	8
ISONEW	2015-05-19	14:42:51	23	5	PP12P120	55	7	0
ISONEW	2015-05-19	14:42:51	40	1	PP12P120	55	8	184
ISONEW	2015-05-19	14:42:51	9	4	NOSTIM	56	1	0
ISONEW	2015-05-19	14:42:51	58	5	NOSTIM	56	2	0
ISONEW	2015-05-19	14:42:51	3	1	NOSTIM	56	3	0
ISONEW	2015-05-19	14:42:51	60	2	NOSTIM	56	4	4
ISONEW	2015-05-19	14:42:51	13	3	NOSTIM	56	5	0
ISONEW	2015-05-19	14:42:51	46	4	NOSTIM	56	6	0
ISONEW	2015-05-19	14:42:51	23	5	NOSTIM	56	7	0
ISONEW	2015-05-19	14:42:51	40	1	NOSTIM	56	8	0
ISONEW	2015-05-19	14:42:51	9	4	P120	57	1	222
ISONEW	2015-05-19	14:42:51	58	5	P120	57	2	22
ISONEW	2015-05-19	14:42:51	3	1	P120	57	3	350
ISONEW	2015-05-19	14:42:51	60	2	P120	57	4	31
ISONEW	2015-05-19	14:42:51	13	3	P120	57	5	979
ISONEW	2015-05-19	14:42:51	46	4	P120	57	6	49
ISONEW	2015-05-19	14:42:51	23	5	P120	57	7	103
ISONEW	2015-05-19	14:42:51	40	1	P120	57	8	424
ISONEW	2015-05-19	14:42:51	9	4	NOSTIM	58	1	0
ISONEW	2015-05-19	14:42:51	58	5	NOSTIM	58	2	0
ISONEW	2015-05-19	14:42:51	3	1	NOSTIM	58	3	0
ISONEW	2015-05-19	14:42:51	60	2	NOSTIM	58	4	0
ISONEW	2015-05-19	14:42:51	13	3	NOSTIM	58	5	0
ISONEW	2015-05-19	14:42:51	46	4	NOSTIM	58	6	0
ISONEW	2015-05-19	14:42:51	23	5	NOSTIM	58	7	0
ISONEW	2015-05-19	14:42:51	40	1	NOSTIM	58	8	0
ISONEW	2015-05-19	14:42:51	9	4	PP6P120	59	1	45
ISONEW	2015-05-19	14:42:51	58	5	PP6P120	59	2	3
ISONEW	2015-05-19	14:42:51	3	1	PP6P120	59	3	74
ISONEW	2015-05-19	14:42:51	60	2	PP6P120	59	4	22
ISONEW	2015-05-19	14:42:51	13	3	PP6P120	59	5	835
ISONEW	2015-05-19	14:42:51	46	4	PP6P120	59	6	1
ISONEW	2015-05-19	14:42:51	23	5	PP6P120	59	7	16
ISONEW	2015-05-19	14:42:51	40	1	PP6P120	59	8	329
ISONEW	2015-05-19	14:42:51	9	4	NOSTIM	60	1	0
ISONEW	2015-05-19	14:42:51	58	5	NOSTIM	60	2	0
ISONEW	2015-05-19	14:42:51	3	1	NOSTIM	60	3	0
ISONEW	2015-05-19	14:42:51	60	2	NOSTIM	60	4	0
ISONEW	2015-05-19	14:42:51	13	3	NOSTIM	60	5	0
ISONEW	2015-05-19	14:42:51	46	4	NOSTIM	60	6	0
ISONEW	2015-05-19	14:42:51	23	5	NOSTIM	60	7	0
ISONEW	2015-05-19	14:42:51	40	1	NOSTIM	60	8	0
ISONEW	2015-05-19	14:42:51	9	4	PP6P120	61	1	35
ISONEW	2015-05-19	14:42:51	58	5	PP6P120	61	2	50
ISONEW	2015-05-19	14:42:51	3	1	PP6P120	61	3	70
ISONEW	2015-05-19	14:42:51	60	2	PP6P120	61	4	39
ISONEW	2015-05-19	14:42:51	13	3	PP6P120	61	5	335
ISONEW	2015-05-19	14:42:51	46	4	PP6P120	61	6	38
ISONEW	2015-05-19	14:42:51	23	5	PP6P120	61	7	30
ISONEW	2015-05-19	14:42:51	40	1	PP6P120	61	8	360
ISONEW	2015-05-19	14:42:51	9	4	NOSTIM	62	1	0
ISONEW	2015-05-19	14:42:51	58	5	NOSTIM	62	2	0
ISONEW	2015-05-19	14:42:51	3	1	NOSTIM	62	3	0
ISONEW	2015-05-19	14:42:51	60	2	NOSTIM	62	4	0
ISONEW	2015-05-19	14:42:51	13	3	NOSTIM	62	5	0
ISONEW	2015-05-19	14:42:51	46	4	NOSTIM	62	6	0
ISONEW	2015-05-19	14:42:51	23	5	NOSTIM	62	7	0
ISONEW	2015-05-19	14:42:51	40	1	NOSTIM	62	8	0
ISONEW	2015-05-19	14:42:51	9	4	PP12P120	63	1	20
ISONEW	2015-05-19	14:42:51	58	5	PP12P120	63	2	6
ISONEW	2015-05-19	14:42:51	3	1	PP12P120	63	3	61
ISONEW	2015-05-19	14:42:51	60	2	PP12P120	63	4	11
ISONEW	2015-05-19	14:42:51	13	3	PP12P120	63	5	162
ISONEW	2015-05-19	14:42:51	46	4	PP12P120	63	6	14
ISONEW	2015-05-19	14:42:51	23	5	PP12P120	63	7	5
ISONEW	2015-05-19	14:42:51	40	1	PP12P120	63	8	80
ISONEW	2015-05-19	14:42:51	9	4	NOSTIM	64	1	0
ISONEW	2015-05-19	14:42:51	58	5	NOSTIM	64	2	0
ISONEW	2015-05-19	14:42:51	3	1	NOSTIM	64	3	0
ISONEW	2015-05-19	14:42:51	60	2	NOSTIM	64	4	0
ISONEW	2015-05-19	14:42:51	13	3	NOSTIM	64	5	0
ISONEW	2015-05-19	14:42:51	46	4	NOSTIM	64	6	0
ISONEW	2015-05-19	14:42:51	23	5	NOSTIM	64	7	0
ISONEW	2015-05-19	14:42:51	40	1	NOSTIM	64	8	0
ISONEW	2015-05-19	14:42:51	9	4	PP3P120	65	1	12
ISONEW	2015-05-19	14:42:51	58	5	PP3P120	65	2	59
ISONEW	2015-05-19	14:42:51	3	1	PP3P120	65	3	105
ISONEW	2015-05-19	14:42:51	60	2	PP3P120	65	4	15
ISONEW	2015-05-19	14:42:51	13	3	PP3P120	65	5	382
ISONEW	2015-05-19	14:42:51	46	4	PP3P120	65	6	3
ISONEW	2015-05-19	14:42:51	23	5	PP3P120	65	7	15
ISONEW	2015-05-19	14:42:51	40	1	PP3P120	65	8	180
ISONEW	2015-05-19	14:42:51	9	4	NOSTIM	66	1	0
ISONEW	2015-05-19	14:42:51	58	5	NOSTIM	66	2	0
ISONEW	2015-05-19	14:42:51	3	1	NOSTIM	66	3	0
ISONEW	2015-05-19	14:42:51	60	2	NOSTIM	66	4	0
ISONEW	2015-05-19	14:42:51	13	3	NOSTIM	66	5	0
ISONEW	2015-05-19	14:42:51	46	4	NOSTIM	66	6	0
ISONEW	2015-05-19	14:42:51	23	5	NOSTIM	66	7	0
ISONEW	2015-05-19	14:42:51	40	1	NOSTIM	66	8	0
ISONEW	2015-05-19	14:42:51	9	4	P120	67	1	89
ISONEW	2015-05-19	14:42:51	58	5	P120	67	2	246
ISONEW	2015-05-19	14:42:51	3	1	P120	67	3	242
ISONEW	2015-05-19	14:42:51	60	2	P120	67	4	50
ISONEW	2015-05-19	14:42:51	13	3	P120	67	5	395
ISONEW	2015-05-19	14:42:51	46	4	P120	67	6	35
ISONEW	2015-05-19	14:42:51	23	5	P120	67	7	20
ISONEW	2015-05-19	14:42:51	40	1	P120	67	8	295
ISONEW	2015-05-19	14:42:51	9	4	NOSTIM	68	1	0
ISONEW	2015-05-19	14:42:51	58	5	NOSTIM	68	2	0
ISONEW	2015-05-19	14:42:51	3	1	NOSTIM	68	3	0
ISONEW	2015-05-19	14:42:51	60	2	NOSTIM	68	4	0
ISONEW	2015-05-19	14:42:51	13	3	NOSTIM	68	5	0
ISONEW	2015-05-19	14:42:51	46	4	NOSTIM	68	6	0
ISONEW	2015-05-19	14:42:51	23	5	NOSTIM	68	7	0
ISONEW	2015-05-19	14:42:51	40	1	NOSTIM	68	8	0
ISONEW	2015-05-19	14:42:51	9	4	PP6P120	69	1	34
ISONEW	2015-05-19	14:42:51	58	5	PP6P120	69	2	5
ISONEW	2015-05-19	14:42:51	3	1	PP6P120	69	3	254
ISONEW	2015-05-19	14:42:51	60	2	PP6P120	69	4	10
ISONEW	2015-05-19	14:42:51	13	3	PP6P120	69	5	103
ISONEW	2015-05-19	14:42:51	46	4	PP6P120	69	6	30
ISONEW	2015-05-19	14:42:51	23	5	PP6P120	69	7	23
ISONEW	2015-05-19	14:42:51	40	1	PP6P120	69	8	97
ISONEW	2015-05-19	14:42:51	9	4	NOSTIM	70	1	0
ISONEW	2015-05-19	14:42:51	58	5	NOSTIM	70	2	0
ISONEW	2015-05-19	14:42:51	3	1	NOSTIM	70	3	0
ISONEW	2015-05-19	14:42:51	60	2	NOSTIM	70	4	0
ISONEW	2015-05-19	14:42:51	13	3	NOSTIM	70	5	0
ISONEW	2015-05-19	14:42:51	46	4	NOSTIM	70	6	0
ISONEW	2015-05-19	14:42:51	23	5	NOSTIM	70	7	0
ISONEW	2015-05-19	14:42:51	40	1	NOSTIM	70	8	0
ISONEW	2015-05-19	14:42:51	9	4	PP3P120	71	1	72
ISONEW	2015-05-19	14:42:51	58	5	PP3P120	71	2	21
ISONEW	2015-05-19	14:42:51	3	1	PP3P120	71	3	216
ISONEW	2015-05-19	14:42:51	60	2	PP3P120	71	4	16
ISONEW	2015-05-19	14:42:51	13	3	PP3P120	71	5	82
ISONEW	2015-05-19	14:42:51	46	4	PP3P120	71	6	19
ISONEW	2015-05-19	14:42:51	23	5	PP3P120	71	7	27
ISONEW	2015-05-19	14:42:51	40	1	PP3P120	71	8	176
ISONEW	2015-05-19	14:42:51	9	4	NOSTIM	72	1	0
ISONEW	2015-05-19	14:42:51	58	5	NOSTIM	72	2	0
ISONEW	2015-05-19	14:42:51	3	1	NOSTIM	72	3	0
ISONEW	2015-05-19	14:42:51	60	2	NOSTIM	72	4	7
ISONEW	2015-05-19	14:42:51	13	3	NOSTIM	72	5	0
ISONEW	2015-05-19	14:42:51	46	4	NOSTIM	72	6	0
ISONEW	2015-05-19	14:42:51	23	5	NOSTIM	72	7	0
ISONEW	2015-05-19	14:42:51	40	1	NOSTIM	72	8	0
ISONEW	2015-05-19	14:42:51	9	4	PP6P120	73	1	20
ISONEW	2015-05-19	14:42:51	58	5	PP6P120	73	2	44
ISONEW	2015-05-19	14:42:51	3	1	PP6P120	73	3	257
ISONEW	2015-05-19	14:42:51	60	2	PP6P120	73	4	14
ISONEW	2015-05-19	14:42:51	13	3	PP6P120	73	5	108
ISONEW	2015-05-19	14:42:51	46	4	PP6P120	73	6	10
ISONEW	2015-05-19	14:42:51	23	5	PP6P120	73	7	16
ISONEW	2015-05-19	14:42:51	40	1	PP6P120	73	8	316
ISONEW	2015-05-19	14:42:51	9	4	NOSTIM	74	1	0
ISONEW	2015-05-19	14:42:51	58	5	NOSTIM	74	2	0
ISONEW	2015-05-19	14:42:51	3	1	NOSTIM	74	3	0
ISONEW	2015-05-19	14:42:51	60	2	NOSTIM	74	4	0
ISONEW	2015-05-19	14:42:51	13	3	NOSTIM	74	5	0
ISONEW	2015-05-19	14:42:51	46	4	NOSTIM	74	6	0
ISONEW	2015-05-19	14:42:51	23	5	NOSTIM	74	7	0
ISONEW	2015-05-19	14:42:51	40	1	NOSTIM	74	8	0
ISONEW	2015-05-19	14:42:51	9	4	P120	75	1	57
ISONEW	2015-05-19	14:42:51	58	5	P120	75	2	77
ISONEW	2015-05-19	14:42:51	3	1	P120	75	3	427
ISONEW	2015-05-19	14:42:51	60	2	P120	75	4	54
ISONEW	2015-05-19	14:42:51	13	3	P120	75	5	393
ISONEW	2015-05-19	14:42:51	46	4	P120	75	6	63
ISONEW	2015-05-19	14:42:51	23	5	P120	75	7	72
ISONEW	2015-05-19	14:42:51	40	1	P120	75	8	544
ISONEW	2015-05-19	14:42:51	9	4	NOSTIM	76	1	0
ISONEW	2015-05-19	14:42:51	58	5	NOSTIM	76	2	0
ISONEW	2015-05-19	14:42:51	3	1	NOSTIM	76	3	0
ISONEW	2015-05-19	14:42:51	60	2	NOSTIM	76	4	0
ISONEW	2015-05-19	14:42:51	13	3	NOSTIM	76	5	1
ISONEW	2015-05-19	14:42:51	46	4	NOSTIM	76	6	0
ISONEW	2015-05-19	14:42:51	23	5	NOSTIM	76	7	0
ISONEW	2015-05-19	14:42:51	40	1	NOSTIM	76	8	0
ISONEW	2015-05-19	14:42:51	9	4	PP12P120	77	1	42
ISONEW	2015-05-19	14:42:51	58	5	PP12P120	77	2	2
ISONEW	2015-05-19	14:42:51	3	1	PP12P120	77	3	229
ISONEW	2015-05-19	14:42:51	60	2	PP12P120	77	4	3
ISONEW	2015-05-19	14:42:51	13	3	PP12P120	77	5	107
ISONEW	2015-05-19	14:42:51	46	4	PP12P120	77	6	1
ISONEW	2015-05-19	14:42:51	23	5	PP12P120	77	7	16
ISONEW	2015-05-19	14:42:51	40	1	PP12P120	77	8	45
ISONEW	2015-05-19	14:42:51	9	4	NOSTIM	78	1	0
ISONEW	2015-05-19	14:42:51	58	5	NOSTIM	78	2	0
ISONEW	2015-05-19	14:42:51	3	1	NOSTIM	78	3	0
ISONEW	2015-05-19	14:42:51	60	2	NOSTIM	78	4	0
ISONEW	2015-05-19	14:42:51	13	3	NOSTIM	78	5	1
ISONEW	2015-05-19	14:42:51	46	4	NOSTIM	78	6	0
ISONEW	2015-05-19	14:42:51	23	5	NOSTIM	78	7	0
ISONEW	2015-05-19	14:42:51	40	1	NOSTIM	78	8	0
ISONEW	2015-05-19	14:42:51	9	4	P120	79	1	103
ISONEW	2015-05-19	14:42:51	58	5	P120	79	2	63
ISONEW	2015-05-19	14:42:51	3	1	P120	79	3	412
ISONEW	2015-05-19	14:42:51	60	2	P120	79	4	43
ISONEW	2015-05-19	14:42:51	13	3	P120	79	5	108
ISONEW	2015-05-19	14:42:51	46	4	P120	79	6	42
ISONEW	2015-05-19	14:42:51	23	5	P120	79	7	105
ISONEW	2015-05-19	14:42:51	40	1	P120	79	8	554
ISONEW	2015-05-19	14:42:51	9	4	NOSTIM	80	1	0
ISONEW	2015-05-19	14:42:51	58	5	NOSTIM	80	2	0
ISONEW	2015-05-19	14:42:51	3	1	NOSTIM	80	3	0
ISONEW	2015-05-19	14:42:51	60	2	NOSTIM	80	4	0
ISONEW	2015-05-19	14:42:51	13	3	NOSTIM	80	5	2
ISONEW	2015-05-19	14:42:51	46	4	NOSTIM	80	6	0
ISONEW	2015-05-19	14:42:51	23	5	NOSTIM	80	7	0
ISONEW	2015-05-19	14:42:51	40	1	NOSTIM	80	8	0
ISONEW	2015-05-19	14:42:51	9	4	PP3P120	81	1	85
ISONEW	2015-05-19	14:42:51	58	5	PP3P120	81	2	28
ISONEW	2015-05-19	14:42:51	3	1	PP3P120	81	3	357
ISONEW	2015-05-19	14:42:51	60	2	PP3P120	81	4	22
ISONEW	2015-05-19	14:42:51	13	3	PP3P120	81	5	376
ISONEW	2015-05-19	14:42:51	46	4	PP3P120	81	6	30
ISONEW	2015-05-19	14:42:51	23	5	PP3P120	81	7	58
ISONEW	2015-05-19	14:42:51	40	1	PP3P120	81	8	309
ISONEW	2015-05-19	14:42:51	9	4	NOSTIM	82	1	0
ISONEW	2015-05-19	14:42:51	58	5	NOSTIM	82	2	0
ISONEW	2015-05-19	14:42:51	3	1	NOSTIM	82	3	0
ISONEW	2015-05-19	14:42:51	60	2	NOSTIM	82	4	0
ISONEW	2015-05-19	14:42:51	13	3	NOSTIM	82	5	0
ISONEW	2015-05-19	14:42:51	46	4	NOSTIM	82	6	0
ISONEW	2015-05-19	14:42:51	23	5	NOSTIM	82	7	0
ISONEW	2015-05-19	14:42:51	40	1	NOSTIM	82	8	0
ISONEW	2015-05-19	14:42:51	9	4	PP12P120	83	1	23
ISONEW	2015-05-19	14:42:51	58	5	PP12P120	83	2	35
ISONEW	2015-05-19	14:42:51	3	1	PP12P120	83	3	81
ISONEW	2015-05-19	14:42:51	60	2	PP12P120	83	4	2
ISONEW	2015-05-19	14:42:51	13	3	PP12P120	83	5	50
ISONEW	2015-05-19	14:42:51	46	4	PP12P120	83	6	4
ISONEW	2015-05-19	14:42:51	23	5	PP12P120	83	7	6
ISONEW	2015-05-19	14:42:51	40	1	PP12P120	83	8	79
ISONEW	2015-05-19	14:42:51	9	4	NOSTIM	84	1	0
ISONEW	2015-05-19	14:42:51	58	5	NOSTIM	84	2	0
ISONEW	2015-05-19	14:42:51	3	1	NOSTIM	84	3	0
ISONEW	2015-05-19	14:42:51	60	2	NOSTIM	84	4	0
ISONEW	2015-05-19	14:42:51	13	3	NOSTIM	84	5	0
ISONEW	2015-05-19	14:42:51	46	4	NOSTIM	84	6	0
ISONEW	2015-05-19	14:42:51	23	5	NOSTIM	84	7	0
ISONEW	2015-05-19	14:42:51	40	1	NOSTIM	84	8	0
ISONEW	2015-05-19	14:42:51	9	4	PP3P120	85	1	66
ISONEW	2015-05-19	14:42:51	58	5	PP3P120	85	2	88
ISONEW	2015-05-19	14:42:51	3	1	PP3P120	85	3	224
ISONEW	2015-05-19	14:42:51	60	2	PP3P120	85	4	97
ISONEW	2015-05-19	14:42:51	13	3	PP3P120	85	5	417
ISONEW	2015-05-19	14:42:51	46	4	PP3P120	85	6	21
ISONEW	2015-05-19	14:42:51	23	5	PP3P120	85	7	19
ISONEW	2015-05-19	14:42:51	40	1	PP3P120	85	8	447
ISONEW	2015-05-19	14:42:51	9	4	NOSTIM	86	1	0
ISONEW	2015-05-19	14:42:51	58	5	NOSTIM	86	2	0
ISONEW	2015-05-19	14:42:51	3	1	NOSTIM	86	3	0
ISONEW	2015-05-19	14:42:51	60	2	NOSTIM	86	4	0
ISONEW	2015-05-19	14:42:51	13	3	NOSTIM	86	5	0
ISONEW	2015-05-19	14:42:51	46	4	NOSTIM	86	6	0
ISONEW	2015-05-19	14:42:51	23	5	NOSTIM	86	7	1
ISONEW	2015-05-19	14:42:51	40	1	NOSTIM	86	8	0
ISONEW	2015-05-19	14:42:51	9	4	PP12P120	87	1	7
ISONEW	2015-05-19	14:42:51	58	5	PP12P120	87	2	90
ISONEW	2015-05-19	14:42:51	3	1	PP12P120	87	3	140
ISONEW	2015-05-19	14:42:51	60	2	PP12P120	87	4	3
ISONEW	2015-05-19	14:42:51	13	3	PP12P120	87	5	426
ISONEW	2015-05-19	14:42:51	46	4	PP12P120	87	6	5
ISONEW	2015-05-19	14:42:51	23	5	PP12P120	87	7	9
ISONEW	2015-05-19	14:42:51	40	1	PP12P120	87	8	45
ISONEW	2015-05-19	14:42:51	9	4	NOSTIM	88	1	0
ISONEW	2015-05-19	14:42:51	58	5	NOSTIM	88	2	0
ISONEW	2015-05-19	14:42:51	3	1	NOSTIM	88	3	0
ISONEW	2015-05-19	14:42:51	60	2	NOSTIM	88	4	9
ISONEW	2015-05-19	14:42:51	13	3	NOSTIM	88	5	0
ISONEW	2015-05-19	14:42:51	46	4	NOSTIM	88	6	0
ISONEW	2015-05-19	14:42:51	23	5	NOSTIM	88	7	0
ISONEW	2015-05-19	14:42:51	40	1	NOSTIM	88	8	0
ISONEW	2015-05-19	14:42:51	9	4	PP6P120	89	1	55
ISONEW	2015-05-19	14:42:51	58	5	PP6P120	89	2	71
ISONEW	2015-05-19	14:42:51	3	1	PP6P120	89	3	208
ISONEW	2015-05-19	14:42:51	60	2	PP6P120	89	4	27
ISONEW	2015-05-19	14:42:51	13	3	PP6P120	89	5	145
ISONEW	2015-05-19	14:42:51	46	4	PP6P120	89	6	3
ISONEW	2015-05-19	14:42:51	23	5	PP6P120	89	7	23
ISONEW	2015-05-19	14:42:51	40	1	PP6P120	89	8	397
ISONEW	2015-05-19	14:42:51	9	4	NOSTIM	90	1	0
ISONEW	2015-05-19	14:42:51	58	5	NOSTIM	90	2	0
ISONEW	2015-05-19	14:42:51	3	1	NOSTIM	90	3	0
ISONEW	2015-05-19	14:42:51	60	2	NOSTIM	90	4	0
ISONEW	2015-05-19	14:42:51	13	3	NOSTIM	90	5	0
ISONEW	2015-05-19	14:42:51	46	4	NOSTIM	90	6	0
ISONEW	2015-05-19	14:42:51	23	5	NOSTIM	90	7	0
ISONEW	2015-05-19	14:42:51	40	1	NOSTIM	90	8	0
ISONEW	2015-05-19	14:42:51	9	4	P120	91	1	242
ISONEW	2015-05-19	14:42:51	58	5	P120	91	2	73
ISONEW	2015-05-19	14:42:51	3	1	P120	91	3	219
ISONEW	2015-05-19	14:42:51	60	2	P120	91	4	82
ISONEW	2015-05-19	14:42:51	13	3	P120	91	5	407
ISONEW	2015-05-19	14:42:51	46	4	P120	91	6	22
ISONEW	2015-05-19	14:42:51	23	5	P120	91	7	148
ISONEW	2015-05-19	14:42:51	40	1	P120	91	8	139
ISONEW	2015-05-19	14:42:51	9	4	NOSTIM	92	1	0
ISONEW	2015-05-19	14:42:51	58	5	NOSTIM	92	2	0
ISONEW	2015-05-19	14:42:51	3	1	NOSTIM	92	3	0
ISONEW	2015-05-19	14:42:51	60	2	NOSTIM	92	4	0
ISONEW	2015-05-19	14:42:51	13	3	NOSTIM	92	5	21
ISONEW	2015-05-19	14:42:51	46	4	NOSTIM	92	6	0
ISONEW	2015-05-19	14:42:51	23	5	NOSTIM	92	7	0
ISONEW	2015-05-19	14:42:51	40	1	NOSTIM	92	8	0
ISONEW	2015-05-19	14:42:51	9	4	PP3P120	93	1	72
ISONEW	2015-05-19	14:42:51	58	5	PP3P120	93	2	18
ISONEW	2015-05-19	14:42:51	3	1	PP3P120	93	3	222
ISONEW	2015-05-19	14:42:51	60	2	PP3P120	93	4	40
ISONEW	2015-05-19	14:42:51	13	3	PP3P120	93	5	390
ISONEW	2015-05-19	14:42:51	46	4	PP3P120	93	6	24
ISONEW	2015-05-19	14:42:51	23	5	PP3P120	93	7	27
ISONEW	2015-05-19	14:42:51	40	1	PP3P120	93	8	434
ISONEW	2015-05-19	14:42:51	9	4	NOSTIM	94	1	0
ISONEW	2015-05-19	14:42:51	58	5	NOSTIM	94	2	0
ISONEW	2015-05-19	14:42:51	3	1	NOSTIM	94	3	0
ISONEW	2015-05-19	14:42:51	60	2	NOSTIM	94	4	0
ISONEW	2015-05-19	14:42:51	13	3	NOSTIM	94	5	0
ISONEW	2015-05-19	14:42:51	46	4	NOSTIM	94	6	0
ISONEW	2015-05-19	14:42:51	23	5	NOSTIM	94	7	0
ISONEW	2015-05-19	14:42:51	40	1	NOSTIM	94	8	0
ISONEW	2015-05-19	14:42:51	9	4	PP12P120	95	1	18
ISONEW	2015-05-19	14:42:51	58	5	PP12P120	95	2	66
ISONEW	2015-05-19	14:42:51	3	1	PP12P120	95	3	88
ISONEW	2015-05-19	14:42:51	60	2	PP12P120	95	4	50
ISONEW	2015-05-19	14:42:51	13	3	PP12P120	95	5	300
ISONEW	2015-05-19	14:42:51	46	4	PP12P120	95	6	9
ISONEW	2015-05-19	14:42:51	23	5	PP12P120	95	7	8
ISONEW	2015-05-19	14:42:51	40	1	PP12P120	95	8	92
ISONEW	2015-05-19	14:42:51	9	4	NOSTIM	96	1	1
ISONEW	2015-05-19	14:42:51	58	5	NOSTIM	96	2	0
ISONEW	2015-05-19	14:42:51	3	1	NOSTIM	96	3	0
ISONEW	2015-05-19	14:42:51	60	2	NOSTIM	96	4	0
ISONEW	2015-05-19	14:42:51	13	3	NOSTIM	96	5	0
ISONEW	2015-05-19	14:42:51	46	4	NOSTIM	96	6	0
ISONEW	2015-05-19	14:42:51	23	5	NOSTIM	96	7	0
ISONEW	2015-05-19	14:42:51	40	1	NOSTIM	96	8	0
ISONEW	2015-05-19	14:42:51	9	4	PP6P120	97	1	29
ISONEW	2015-05-19	14:42:51	58	5	PP6P120	97	2	77
ISONEW	2015-05-19	14:42:51	3	1	PP6P120	97	3	63
ISONEW	2015-05-19	14:42:51	60	2	PP6P120	97	4	11
ISONEW	2015-05-19	14:42:51	13	3	PP6P120	97	5	218
ISONEW	2015-05-19	14:42:51	46	4	PP6P120	97	6	8
ISONEW	2015-05-19	14:42:51	23	5	PP6P120	97	7	20
ISONEW	2015-05-19	14:42:51	40	1	PP6P120	97	8	173
ISONEW	2015-05-19	14:42:51	9	4	NOSTIM	98	1	0
ISONEW	2015-05-19	14:42:51	58	5	NOSTIM	98	2	0
ISONEW	2015-05-19	14:42:51	3	1	NOSTIM	98	3	0
ISONEW	2015-05-19	14:42:51	60	2	NOSTIM	98	4	0
ISONEW	2015-05-19	14:42:51	13	3	NOSTIM	98	5	0
ISONEW	2015-05-19	14:42:51	46	4	NOSTIM	98	6	0
ISONEW	2015-05-19	14:42:51	23	5	NOSTIM	98	7	0
ISONEW	2015-05-19	14:42:51	40	1	NOSTIM	98	8	0
ISONEW	2015-05-19	14:42:51	9	4	P120	99	1	65
ISONEW	2015-05-19	14:42:51	58	5	P120	99	2	54
ISONEW	2015-05-19	14:42:51	3	1	P120	99	3	137
ISONEW	2015-05-19	14:42:51	60	2	P120	99	4	20
ISONEW	2015-05-19	14:42:51	13	3	P120	99	5	366
ISONEW	2015-05-19	14:42:51	46	4	P120	99	6	63
ISONEW	2015-05-19	14:42:51	23	5	P120	99	7	39
ISONEW	2015-05-19	14:42:51	40	1	P120	99	8	240
ISONEW	2015-05-19	14:42:51	9	4	NOSTIM	100	1	0
ISONEW	2015-05-19	14:42:51	58	5	NOSTIM	100	2	1
ISONEW	2015-05-19	14:42:51	3	1	NOSTIM	100	3	0
ISONEW	2015-05-19	14:42:51	60	2	NOSTIM	100	4	0
ISONEW	2015-05-19	14:42:51	13	3	NOSTIM	100	5	0
ISONEW	2015-05-19	14:42:51	46	4	NOSTIM	100	6	0
ISONEW	2015-05-19	14:42:51	23	5	NOSTIM	100	7	0
ISONEW	2015-05-19	14:42:51	40	1	NOSTIM	100	8	0
ISONEW	2015-05-19	14:42:51	9	4	PP3P120	101	1	51
ISONEW	2015-05-19	14:42:51	58	5	PP3P120	101	2	17
ISONEW	2015-05-19	14:42:51	3	1	PP3P120	101	3	329
ISONEW	2015-05-19	14:42:51	60	2	PP3P120	101	4	19
ISONEW	2015-05-19	14:42:51	13	3	PP3P120	101	5	457
ISONEW	2015-05-19	14:42:51	46	4	PP3P120	101	6	99
ISONEW	2015-05-19	14:42:51	23	5	PP3P120	101	7	33
ISONEW	2015-05-19	14:42:51	40	1	PP3P120	101	8	134
ISONEW	2015-05-19	14:42:51	9	4	NOSTIM	102	1	0
ISONEW	2015-05-19	14:42:51	58	5	NOSTIM	102	2	0
ISONEW	2015-05-19	14:42:51	3	1	NOSTIM	102	3	0
ISONEW	2015-05-19	14:42:51	60	2	NOSTIM	102	4	0
ISONEW	2015-05-19	14:42:51	13	3	NOSTIM	102	5	0
ISONEW	2015-05-19	14:42:51	46	4	NOSTIM	102	6	0
ISONEW	2015-05-19	14:42:51	23	5	NOSTIM	102	7	0
ISONEW	2015-05-19	14:42:51	40	1	NOSTIM	102	8	3
ISONEW	2015-05-19	14:42:51	9	4	PP12P120	103	1	31
ISONEW	2015-05-19	14:42:51	58	5	PP12P120	103	2	39
ISONEW	2015-05-19	14:42:51	3	1	PP12P120	103	3	54
ISONEW	2015-05-19	14:42:51	60	2	PP12P120	103	4	5
ISONEW	2015-05-19	14:42:51	13	3	PP12P120	103	5	109
ISONEW	2015-05-19	14:42:51	46	4	PP12P120	103	6	2
ISONEW	2015-05-19	14:42:51	23	5	PP12P120	103	7	7
ISONEW	2015-05-19	14:42:51	40	1	PP12P120	103	8	129
ISONEW	2015-05-19	14:42:51	9	4	NOSTIM	104	1	0
ISONEW	2015-05-19	14:42:51	58	5	NOSTIM	104	2	0
ISONEW	2015-05-19	14:42:51	3	1	NOSTIM	104	3	0
ISONEW	2015-05-19	14:42:51	60	2	NOSTIM	104	4	0
ISONEW	2015-05-19	14:42:51	13	3	NOSTIM	104	5	0
ISONEW	2015-05-19	14:42:51	46	4	NOSTIM	104	6	0
ISONEW	2015-05-19	14:42:51	23	5	NOSTIM	104	7	0
ISONEW	2015-05-19	14:42:51	40	1	NOSTIM	104	8	0
ISONEW	2015-05-19	14:42:51	9	4	P120	105	1	94
ISONEW	2015-05-19	14:42:51	58	5	P120	105	2	30
ISONEW	2015-05-19	14:42:51	3	1	P120	105	3	79
ISONEW	2015-05-19	14:42:51	60	2	P120	105	4	71
ISONEW	2015-05-19	14:42:51	13	3	P120	105	5	580
ISONEW	2015-05-19	14:42:51	46	4	P120	105	6	11
ISONEW	2015-05-19	14:42:51	23	5	P120	105	7	81
ISONEW	2015-05-19	14:42:51	40	1	P120	105	8	373
ISONEW	2015-05-19	14:42:51	9	4	NOSTIM	106	1	0
ISONEW	2015-05-19	14:42:51	58	5	NOSTIM	106	2	0
ISONEW	2015-05-19	14:42:51	3	1	NOSTIM	106	3	0
ISONEW	2015-05-19	14:42:51	60	2	NOSTIM	106	4	0
ISONEW	2015-05-19	14:42:51	13	3	NOSTIM	106	5	0
ISONEW	2015-05-19	14:42:51	46	4	NOSTIM	106	6	0
ISONEW	2015-05-19	14:42:51	23	5	NOSTIM	106	7	0
ISONEW	2015-05-19	14:42:51	40	1	NOSTIM	106	8	0
ISONEW	2015-05-19	14:42:51	9	4	PP6P120	107	1	44
ISONEW	2015-05-19	14:42:51	58	5	PP6P120	107	2	99
ISONEW	2015-05-19	14:42:51	3	1	PP6P120	107	3	82
ISONEW	2015-05-19	14:42:51	60	2	PP6P120	107	4	38
ISONEW	2015-05-19	14:42:51	13	3	PP6P120	107	5	222
ISONEW	2015-05-19	14:42:51	46	4	PP6P120	107	6	13
ISONEW	2015-05-19	14:42:51	23	5	PP6P120	107	7	15
ISONEW	2015-05-19	14:42:51	40	1	PP6P120	107	8	255
ISONEW	2015-05-19	14:42:51	9	4	NOSTIM	108	1	0
ISONEW	2015-05-19	14:42:51	58	5	NOSTIM	108	2	0
ISONEW	2015-05-19	14:42:51	3	1	NOSTIM	108	3	0
ISONEW	2015-05-19	14:42:51	60	2	NOSTIM	108	4	0
ISONEW	2015-05-19	14:42:51	13	3	NOSTIM	108	5	0
ISONEW	2015-05-19	14:42:51	46	4	NOSTIM	108	6	1
ISONEW	2015-05-19	14:42:51	23	5	NOSTIM	108	7	0
ISONEW	2015-05-19	14:42:51	40	1	NOSTIM	108	8	0
ISONEW	2015-05-19	14:42:51	9	4	P120	109	1	199
ISONEW	2015-05-19	14:42:51	58	5	P120	109	2	179
ISONEW	2015-05-19	14:42:51	3	1	P120	109	3	99
ISONEW	2015-05-19	14:42:51	60	2	P120	109	4	37
ISONEW	2015-05-19	14:42:51	13	3	P120	109	5	1031
ISONEW	2015-05-19	14:42:51	46	4	P120	109	6	39
ISONEW	2015-05-19	14:42:51	23	5	P120	109	7	116
ISONEW	2015-05-19	14:42:51	40	1	P120	109	8	400
ISONEW	2015-05-19	14:42:51	9	4	NOSTIM	110	1	0
ISONEW	2015-05-19	14:42:51	58	5	NOSTIM	110	2	1
ISONEW	2015-05-19	14:42:51	3	1	NOSTIM	110	3	0
ISONEW	2015-05-19	14:42:51	60	2	NOSTIM	110	4	0
ISONEW	2015-05-19	14:42:51	13	3	NOSTIM	110	5	0
ISONEW	2015-05-19	14:42:51	46	4	NOSTIM	110	6	0
ISONEW	2015-05-19	14:42:51	23	5	NOSTIM	110	7	0
ISONEW	2015-05-19	14:42:51	40	1	NOSTIM	110	8	0
ISONEW	2015-05-19	14:42:51	9	4	P120	111	1	53
ISONEW	2015-05-19	14:42:51	58	5	P120	111	2	76
ISONEW	2015-05-19	14:42:51	3	1	P120	111	3	529
ISONEW	2015-05-19	14:42:51	60	2	P120	111	4	59
ISONEW	2015-05-19	14:42:51	13	3	P120	111	5	624
ISONEW	2015-05-19	14:42:51	46	4	P120	111	6	54
ISONEW	2015-05-19	14:42:51	23	5	P120	111	7	83
ISONEW	2015-05-19	14:42:51	40	1	P120	111	8	295
ISONEW	2015-05-19	14:42:51	9	4	NOSTIM	112	1	0
ISONEW	2015-05-19	14:42:51	58	5	NOSTIM	112	2	0
ISONEW	2015-05-19	14:42:51	3	1	NOSTIM	112	3	0
ISONEW	2015-05-19	14:42:51	60	2	NOSTIM	112	4	9
ISONEW	2015-05-19	14:42:51	13	3	NOSTIM	112	5	0
ISONEW	2015-05-19	14:42:51	46	4	NOSTIM	112	6	0
ISONEW	2015-05-19	14:42:51	23	5	NOSTIM	112	7	0
ISONEW	2015-05-19	14:42:51	40	1	NOSTIM	112	8	0
ISONEW	2015-05-19	14:42:51	9	4	P120	113	1	63
ISONEW	2015-05-19	14:42:51	58	5	P120	113	2	20
ISONEW	2015-05-19	14:42:51	3	1	P120	113	3	363
ISONEW	2015-05-19	14:42:51	60	2	P120	113	4	40
ISONEW	2015-05-19	14:42:51	13	3	P120	113	5	388
ISONEW	2015-05-19	14:42:51	46	4	P120	113	6	24
ISONEW	2015-05-19	14:42:51	23	5	P120	113	7	51
ISONEW	2015-05-19	14:42:51	40	1	P120	113	8	439
ISONEW	2015-05-19	14:42:51	9	4	NOSTIM	114	1	0
ISONEW	2015-05-19	14:42:51	58	5	NOSTIM	114	2	0
ISONEW	2015-05-19	14:42:51	3	1	NOSTIM	114	3	0
ISONEW	2015-05-19	14:42:51	60	2	NOSTIM	114	4	0
ISONEW	2015-05-19	14:42:51	13	3	NOSTIM	114	5	1
ISONEW	2015-05-19	14:42:51	46	4	NOSTIM	114	6	0
ISONEW	2015-05-19	14:42:51	23	5	NOSTIM	114	7	0
ISONEW	2015-05-19	14:42:51	40	1	NOSTIM	114	8	0
ISONEW	2015-05-19	14:42:51	9	4	P120	115	1	28
ISONEW	2015-05-19	14:42:51	58	5	P120	115	2	82
ISONEW	2015-05-19	14:42:51	3	1	P120	115	3	253
ISONEW	2015-05-19	14:42:51	60	2	P120	115	4	68
ISONEW	2015-05-19	14:42:51	13	3	P120	115	5	263
ISONEW	2015-05-19	14:42:51	46	4	P120	115	6	136
ISONEW	2015-05-19	14:42:51	23	5	P120	115	7	48
ISONEW	2015-05-19	14:42:51	40	1	P120	115	8	606
ISONEW	2015-05-19	14:42:51	9	4	NOSTIM	116	1	0
ISONEW	2015-05-19	14:42:51	58	5	NOSTIM	116	2	0
ISONEW	2015-05-19	14:42:51	3	1	NOSTIM	116	3	0
ISONEW	2015-05-19	14:42:51	60	2	NOSTIM	116	4	0
ISONEW	2015-05-19	14:42:51	13	3	NOSTIM	116	5	0
ISONEW	2015-05-19	14:42:51	46	4	NOSTIM	116	6	0
ISONEW	2015-05-19	14:42:51	23	5	NOSTIM	116	7	0
ISONEW	2015-05-19	14:42:51	40	1	NOSTIM	116	8	0
ISONEW	2015-05-19	14:42:51	9	4	P120	117	1	67
ISONEW	2015-05-19	14:42:51	58	5	P120	117	2	141
ISONEW	2015-05-19	14:42:51	3	1	P120	117	3	149
ISONEW	2015-05-19	14:42:51	60	2	P120	117	4	57
ISONEW	2015-05-19	14:42:51	13	3	P120	117	5	337
ISONEW	2015-05-19	14:42:51	46	4	P120	117	6	48
ISONEW	2015-05-19	14:42:51	23	5	P120	117	7	13
ISONEW	2015-05-19	14:42:51	40	1	P120	117	8	404
ISONEW	2015-05-19	14:42:51	9	4	NOSTIM	118	1	0
ISONEW	2015-05-19	14:42:51	58	5	NOSTIM	118	2	0
ISONEW	2015-05-19	14:42:51	3	1	NOSTIM	118	3	0
ISONEW	2015-05-19	14:42:51	60	2	NOSTIM	118	4	1
ISONEW	2015-05-19	14:42:51	13	3	NOSTIM	118	5	0
ISONEW	2015-05-19	14:42:51	46	4	NOSTIM	118	6	0
ISONEW	2015-05-19	14:42:51	23	5	NOSTIM	118	7	0
ISONEW	2015-05-19	14:42:51	40	1	NOSTIM	118	8	0
ISONEW	2015-05-19	14:42:51	9	4	P120	119	1	83
ISONEW	2015-05-19	14:42:51	58	5	P120	119	2	81
ISONEW	2015-05-19	14:42:51	3	1	P120	119	3	368
ISONEW	2015-05-19	14:42:51	60	2	P120	119	4	68
ISONEW	2015-05-19	14:42:51	13	3	P120	119	5	71
ISONEW	2015-05-19	14:42:51	46	4	P120	119	6	16
ISONEW	2015-05-19	14:42:51	23	5	P120	119	7	68
ISONEW	2015-05-19	14:42:51	40	1	P120	119	8	472
ISONEW	2015-05-19	14:42:51	9	4	NOSTIM	120	1	0
ISONEW	2015-05-19	14:42:51	58	5	NOSTIM	120	2	7
ISONEW	2015-05-19	14:42:51	3	1	NOSTIM	120	3	1
ISONEW	2015-05-19	14:42:51	60	2	NOSTIM	120	4	0
ISONEW	2015-05-19	14:42:51	13	3	NOSTIM	120	5	2
ISONEW	2015-05-19	14:42:51	46	4	NOSTIM	120	6	0
ISONEW	2015-05-19	14:42:51	23	5	NOSTIM	120	7	0
ISONEW	2015-05-19	14:42:51	40	1	NOSTIM	120	8	0
ISONEW	2015-05-19	15:25:09	49	2	P120	1	1	530
ISONEW	2015-05-19	15:25:09	2	3	P120	1	2	900
ISONEW	2015-05-19	15:25:09	11	4	P120	1	3	805
ISONEW	2015-05-19	15:25:09	36	5	P120	1	4	373
ISONEW	2015-05-19	15:25:09	5	1	P120	1	5	362
ISONEW	2015-05-19	15:25:09	6	2	P120	1	6	1523
ISONEW	2015-05-19	15:25:09	7	3	P120	1	7	487
ISONEW	2015-05-19	15:25:09	16	4	P120	1	8	474
ISONEW	2015-05-19	15:25:09	49	2	NOSTIM	2	1	0
ISONEW	2015-05-19	15:25:09	2	3	NOSTIM	2	2	0
ISONEW	2015-05-19	15:25:09	11	4	NOSTIM	2	3	0
ISONEW	2015-05-19	15:25:09	36	5	NOSTIM	2	4	0
ISONEW	2015-05-19	15:25:09	5	1	NOSTIM	2	5	0
ISONEW	2015-05-19	15:25:09	6	2	NOSTIM	2	6	0
ISONEW	2015-05-19	15:25:09	7	3	NOSTIM	2	7	0
ISONEW	2015-05-19	15:25:09	16	4	NOSTIM	2	8	0
ISONEW	2015-05-19	15:25:09	49	2	P120	3	1	677
ISONEW	2015-05-19	15:25:09	2	3	P120	3	2	1117
ISONEW	2015-05-19	15:25:09	11	4	P120	3	3	1066
ISONEW	2015-05-19	15:25:09	36	5	P120	3	4	2469
ISONEW	2015-05-19	15:25:09	5	1	P120	3	5	294
ISONEW	2015-05-19	15:25:09	6	2	P120	3	6	1807
ISONEW	2015-05-19	15:25:09	7	3	P120	3	7	1694
ISONEW	2015-05-19	15:25:09	16	4	P120	3	8	1741
ISONEW	2015-05-19	15:25:09	49	2	NOSTIM	4	1	0
ISONEW	2015-05-19	15:25:09	2	3	NOSTIM	4	2	0
ISONEW	2015-05-19	15:25:09	11	4	NOSTIM	4	3	1
ISONEW	2015-05-19	15:25:09	36	5	NOSTIM	4	4	0
ISONEW	2015-05-19	15:25:09	5	1	NOSTIM	4	5	0
ISONEW	2015-05-19	15:25:09	6	2	NOSTIM	4	6	0
ISONEW	2015-05-19	15:25:09	7	3	NOSTIM	4	7	0
ISONEW	2015-05-19	15:25:09	16	4	NOSTIM	4	8	0
ISONEW	2015-05-19	15:25:09	49	2	P120	5	1	599
ISONEW	2015-05-19	15:25:09	2	3	P120	5	2	1376
ISONEW	2015-05-19	15:25:09	11	4	P120	5	3	91
ISONEW	2015-05-19	15:25:09	36	5	P120	5	4	307
ISONEW	2015-05-19	15:25:09	5	1	P120	5	5	162
ISONEW	2015-05-19	15:25:09	6	2	P120	5	6	1123
ISONEW	2015-05-19	15:25:09	7	3	P120	5	7	859
ISONEW	2015-05-19	15:25:09	16	4	P120	5	8	420
ISONEW	2015-05-19	15:25:09	49	2	NOSTIM	6	1	0
ISONEW	2015-05-19	15:25:09	2	3	NOSTIM	6	2	0
ISONEW	2015-05-19	15:25:09	11	4	NOSTIM	6	3	0
ISONEW	2015-05-19	15:25:09	36	5	NOSTIM	6	4	0
ISONEW	2015-05-19	15:25:09	5	1	NOSTIM	6	5	0
ISONEW	2015-05-19	15:25:09	6	2	NOSTIM	6	6	0
ISONEW	2015-05-19	15:25:09	7	3	NOSTIM	6	7	0
ISONEW	2015-05-19	15:25:09	16	4	NOSTIM	6	8	0
ISONEW	2015-05-19	15:25:09	49	2	P120	7	1	144
ISONEW	2015-05-19	15:25:09	2	3	P120	7	2	743
ISONEW	2015-05-19	15:25:09	11	4	P120	7	3	617
ISONEW	2015-05-19	15:25:09	36	5	P120	7	4	227
ISONEW	2015-05-19	15:25:09	5	1	P120	7	5	392
ISONEW	2015-05-19	15:25:09	6	2	P120	7	6	1616
ISONEW	2015-05-19	15:25:09	7	3	P120	7	7	382
ISONEW	2015-05-19	15:25:09	16	4	P120	7	8	1820
ISONEW	2015-05-19	15:25:09	49	2	NOSTIM	8	1	0
ISONEW	2015-05-19	15:25:09	2	3	NOSTIM	8	2	0
ISONEW	2015-05-19	15:25:09	11	4	NOSTIM	8	3	0
ISONEW	2015-05-19	15:25:09	36	5	NOSTIM	8	4	0
ISONEW	2015-05-19	15:25:09	5	1	NOSTIM	8	5	0
ISONEW	2015-05-19	15:25:09	6	2	NOSTIM	8	6	0
ISONEW	2015-05-19	15:25:09	7	3	NOSTIM	8	7	0
ISONEW	2015-05-19	15:25:09	16	4	NOSTIM	8	8	0
ISONEW	2015-05-19	15:25:09	49	2	P120	9	1	77
ISONEW	2015-05-19	15:25:09	2	3	P120	9	2	289
ISONEW	2015-05-19	15:25:09	11	4	P120	9	3	349
ISONEW	2015-05-19	15:25:09	36	5	P120	9	4	223
ISONEW	2015-05-19	15:25:09	5	1	P120	9	5	67
ISONEW	2015-05-19	15:25:09	6	2	P120	9	6	1075
ISONEW	2015-05-19	15:25:09	7	3	P120	9	7	150
ISONEW	2015-05-19	15:25:09	16	4	P120	9	8	523
ISONEW	2015-05-19	15:25:09	49	2	NOSTIM	10	1	1
ISONEW	2015-05-19	15:25:09	2	3	NOSTIM	10	2	0
ISONEW	2015-05-19	15:25:09	11	4	NOSTIM	10	3	0
ISONEW	2015-05-19	15:25:09	36	5	NOSTIM	10	4	0
ISONEW	2015-05-19	15:25:09	5	1	NOSTIM	10	5	0
ISONEW	2015-05-19	15:25:09	6	2	NOSTIM	10	6	0
ISONEW	2015-05-19	15:25:09	7	3	NOSTIM	10	7	0
[truncated: 4,721 more rows]

## Sheet: s768dcmb
Session	Date	Time	Subject	Grp	Trial Type	Trial #	Box	Startle
ISONEW	2015-06-04	14:39:53	49	1	P120	1	1	1933
ISONEW	2015-06-04	14:39:53	18	2	P120	1	2	1722
ISONEW	2015-06-04	14:39:53	27	3	P120	1	3	1619
ISONEW	2015-06-04	14:39:53	36	4	P120	1	4	1142
ISONEW	2015-06-04	14:39:53	53	5	P120	1	5	653
ISONEW	2015-06-04	14:39:53	46	1	P120	1	6	2092
ISONEW	2015-06-04	14:39:53	15	2	P120	1	7	944
ISONEW	2015-06-04	14:39:53	56	3	P120	1	8	1687
ISONEW	2015-06-04	14:39:53	49	1	NOSTIM	2	1	0
ISONEW	2015-06-04	14:39:53	18	2	NOSTIM	2	2	0
ISONEW	2015-06-04	14:39:53	27	3	NOSTIM	2	3	0
ISONEW	2015-06-04	14:39:53	36	4	NOSTIM	2	4	0
ISONEW	2015-06-04	14:39:53	53	5	NOSTIM	2	5	20
ISONEW	2015-06-04	14:39:53	46	1	NOSTIM	2	6	0
ISONEW	2015-06-04	14:39:53	15	2	NOSTIM	2	7	0
ISONEW	2015-06-04	14:39:53	56	3	NOSTIM	2	8	0
ISONEW	2015-06-04	14:39:53	49	1	P120	3	1	1048
ISONEW	2015-06-04	14:39:53	18	2	P120	3	2	1529
ISONEW	2015-06-04	14:39:53	27	3	P120	3	3	1976
ISONEW	2015-06-04	14:39:53	36	4	P120	3	4	512
ISONEW	2015-06-04	14:39:53	53	5	P120	3	5	278
ISONEW	2015-06-04	14:39:53	46	1	P120	3	6	282
ISONEW	2015-06-04	14:39:53	15	2	P120	3	7	1074
ISONEW	2015-06-04	14:39:53	56	3	P120	3	8	910
ISONEW	2015-06-04	14:39:53	49	1	NOSTIM	4	1	0
ISONEW	2015-06-04	14:39:53	18	2	NOSTIM	4	2	0
ISONEW	2015-06-04	14:39:53	27	3	NOSTIM	4	3	0
ISONEW	2015-06-04	14:39:53	36	4	NOSTIM	4	4	0
ISONEW	2015-06-04	14:39:53	53	5	NOSTIM	4	5	23
ISONEW	2015-06-04	14:39:53	46	1	NOSTIM	4	6	0
ISONEW	2015-06-04	14:39:53	15	2	NOSTIM	4	7	0
ISONEW	2015-06-04	14:39:53	56	3	NOSTIM	4	8	0
ISONEW	2015-06-04	14:39:53	49	1	P120	5	1	392
ISONEW	2015-06-04	14:39:53	18	2	P120	5	2	1529
ISONEW	2015-06-04	14:39:53	27	3	P120	5	3	1485
ISONEW	2015-06-04	14:39:53	36	4	P120	5	4	308
ISONEW	2015-06-04	14:39:53	53	5	P120	5	5	522
ISONEW	2015-06-04	14:39:53	46	1	P120	5	6	165
ISONEW	2015-06-04	14:39:53	15	2	P120	5	7	269
ISONEW	2015-06-04	14:39:53	56	3	P120	5	8	939
ISONEW	2015-06-04	14:39:53	49	1	NOSTIM	6	1	0
ISONEW	2015-06-04	14:39:53	18	2	NOSTIM	6	2	0
ISONEW	2015-06-04	14:39:53	27	3	NOSTIM	6	3	0
ISONEW	2015-06-04	14:39:53	36	4	NOSTIM	6	4	0
ISONEW	2015-06-04	14:39:53	53	5	NOSTIM	6	5	7
ISONEW	2015-06-04	14:39:53	46	1	NOSTIM	6	6	0
ISONEW	2015-06-04	14:39:53	15	2	NOSTIM	6	7	0
ISONEW	2015-06-04	14:39:53	56	3	NOSTIM	6	8	0
ISONEW	2015-06-04	14:39:53	49	1	P120	7	1	379
ISONEW	2015-06-04	14:39:53	18	2	P120	7	2	1428
ISONEW	2015-06-04	14:39:53	27	3	P120	7	3	1741
ISONEW	2015-06-04	14:39:53	36	4	P120	7	4	575
ISONEW	2015-06-04	14:39:53	53	5	P120	7	5	221
ISONEW	2015-06-04	14:39:53	46	1	P120	7	6	145
ISONEW	2015-06-04	14:39:53	15	2	P120	7	7	272
ISONEW	2015-06-04	14:39:53	56	3	P120	7	8	636
ISONEW	2015-06-04	14:39:53	49	1	NOSTIM	8	1	0
ISONEW	2015-06-04	14:39:53	18	2	NOSTIM	8	2	0
ISONEW	2015-06-04	14:39:53	27	3	NOSTIM	8	3	0
ISONEW	2015-06-04	14:39:53	36	4	NOSTIM	8	4	0
ISONEW	2015-06-04	14:39:53	53	5	NOSTIM	8	5	0
ISONEW	2015-06-04	14:39:53	46	1	NOSTIM	8	6	0
ISONEW	2015-06-04	14:39:53	15	2	NOSTIM	8	7	0
ISONEW	2015-06-04	14:39:53	56	3	NOSTIM	8	8	0
ISONEW	2015-06-04	14:39:53	49	1	P120	9	1	150
ISONEW	2015-06-04	14:39:53	18	2	P120	9	2	1695
ISONEW	2015-06-04	14:39:53	27	3	P120	9	3	1673
ISONEW	2015-06-04	14:39:53	36	4	P120	9	4	319
ISONEW	2015-06-04	14:39:53	53	5	P120	9	5	262
ISONEW	2015-06-04	14:39:53	46	1	P120	9	6	113
ISONEW	2015-06-04	14:39:53	15	2	P120	9	7	324
ISONEW	2015-06-04	14:39:53	56	3	P120	9	8	346
ISONEW	2015-06-04	14:39:53	49	1	NOSTIM	10	1	0
ISONEW	2015-06-04	14:39:53	18	2	NOSTIM	10	2	1
ISONEW	2015-06-04	14:39:53	27	3	NOSTIM	10	3	0
ISONEW	2015-06-04	14:39:53	36	4	NOSTIM	10	4	0
ISONEW	2015-06-04	14:39:53	53	5	NOSTIM	10	5	4
ISONEW	2015-06-04	14:39:53	46	1	NOSTIM	10	6	0
ISONEW	2015-06-04	14:39:53	15	2	NOSTIM	10	7	0
ISONEW	2015-06-04	14:39:53	56	3	NOSTIM	10	8	0
ISONEW	2015-06-04	14:39:53	49	1	P120	11	1	118
ISONEW	2015-06-04	14:39:53	18	2	P120	11	2	1237
ISONEW	2015-06-04	14:39:53	27	3	P120	11	3	313
ISONEW	2015-06-04	14:39:53	36	4	P120	11	4	308
ISONEW	2015-06-04	14:39:53	53	5	P120	11	5	185
ISONEW	2015-06-04	14:39:53	46	1	P120	11	6	101
ISONEW	2015-06-04	14:39:53	15	2	P120	11	7	296
ISONEW	2015-06-04	14:39:53	56	3	P120	11	8	222
ISONEW	2015-06-04	14:39:53	49	1	NOSTIM	12	1	0
ISONEW	2015-06-04	14:39:53	18	2	NOSTIM	12	2	0
ISONEW	2015-06-04	14:39:53	27	3	NOSTIM	12	3	0
ISONEW	2015-06-04	14:39:53	36	4	NOSTIM	12	4	0
ISONEW	2015-06-04	14:39:53	53	5	NOSTIM	12	5	2
ISONEW	2015-06-04	14:39:53	46	1	NOSTIM	12	6	0
ISONEW	2015-06-04	14:39:53	15	2	NOSTIM	12	7	0
ISONEW	2015-06-04	14:39:53	56	3	NOSTIM	12	8	0
ISONEW	2015-06-04	14:39:53	49	1	PP6P120	13	1	3
ISONEW	2015-06-04	14:39:53	18	2	PP6P120	13	2	81
ISONEW	2015-06-04	14:39:53	27	3	PP6P120	13	3	158
ISONEW	2015-06-04	14:39:53	36	4	PP6P120	13	4	283
ISONEW	2015-06-04	14:39:53	53	5	PP6P120	13	5	462
ISONEW	2015-06-04	14:39:53	46	1	PP6P120	13	6	19
ISONEW	2015-06-04	14:39:53	15	2	PP6P120	13	7	73
ISONEW	2015-06-04	14:39:53	56	3	PP6P120	13	8	79
ISONEW	2015-06-04	14:39:53	49	1	NOSTIM	14	1	0
ISONEW	2015-06-04	14:39:53	18	2	NOSTIM	14	2	0
ISONEW	2015-06-04	14:39:53	27	3	NOSTIM	14	3	0
ISONEW	2015-06-04	14:39:53	36	4	NOSTIM	14	4	0
ISONEW	2015-06-04	14:39:53	53	5	NOSTIM	14	5	5
ISONEW	2015-06-04	14:39:53	46	1	NOSTIM	14	6	0
ISONEW	2015-06-04	14:39:53	15	2	NOSTIM	14	7	0
ISONEW	2015-06-04	14:39:53	56	3	NOSTIM	14	8	0
ISONEW	2015-06-04	14:39:53	49	1	PP12P120	15	1	9
ISONEW	2015-06-04	14:39:53	18	2	PP12P120	15	2	93
ISONEW	2015-06-04	14:39:53	27	3	PP12P120	15	3	186
ISONEW	2015-06-04	14:39:53	36	4	PP12P120	15	4	176
ISONEW	2015-06-04	14:39:53	53	5	PP12P120	15	5	142
ISONEW	2015-06-04	14:39:53	46	1	PP12P120	15	6	11
ISONEW	2015-06-04	14:39:53	15	2	PP12P120	15	7	20
ISONEW	2015-06-04	14:39:53	56	3	PP12P120	15	8	25
ISONEW	2015-06-04	14:39:53	49	1	NOSTIM	16	1	0
ISONEW	2015-06-04	14:39:53	18	2	NOSTIM	16	2	0
ISONEW	2015-06-04	14:39:53	27	3	NOSTIM	16	3	0
ISONEW	2015-06-04	14:39:53	36	4	NOSTIM	16	4	0
ISONEW	2015-06-04	14:39:53	53	5	NOSTIM	16	5	6
ISONEW	2015-06-04	14:39:53	46	1	NOSTIM	16	6	0
ISONEW	2015-06-04	14:39:53	15	2	NOSTIM	16	7	0
ISONEW	2015-06-04	14:39:53	56	3	NOSTIM	16	8	0
ISONEW	2015-06-04	14:39:53	49	1	PP3P120	17	1	32
ISONEW	2015-06-04	14:39:53	18	2	PP3P120	17	2	775
ISONEW	2015-06-04	14:39:53	27	3	PP3P120	17	3	651
ISONEW	2015-06-04	14:39:53	36	4	PP3P120	17	4	319
ISONEW	2015-06-04	14:39:53	53	5	PP3P120	17	5	100
ISONEW	2015-06-04	14:39:53	46	1	PP3P120	17	6	33
ISONEW	2015-06-04	14:39:53	15	2	PP3P120	17	7	61
ISONEW	2015-06-04	14:39:53	56	3	PP3P120	17	8	258
ISONEW	2015-06-04	14:39:53	49	1	NOSTIM	18	1	0
ISONEW	2015-06-04	14:39:53	18	2	NOSTIM	18	2	0
ISONEW	2015-06-04	14:39:53	27	3	NOSTIM	18	3	0
ISONEW	2015-06-04	14:39:53	36	4	NOSTIM	18	4	0
ISONEW	2015-06-04	14:39:53	53	5	NOSTIM	18	5	10
ISONEW	2015-06-04	14:39:53	46	1	NOSTIM	18	6	0
ISONEW	2015-06-04	14:39:53	15	2	NOSTIM	18	7	0
ISONEW	2015-06-04	14:39:53	56	3	NOSTIM	18	8	0
ISONEW	2015-06-04	14:39:53	49	1	P120	19	1	239
ISONEW	2015-06-04	14:39:53	18	2	P120	19	2	813
ISONEW	2015-06-04	14:39:53	27	3	P120	19	3	956
ISONEW	2015-06-04	14:39:53	36	4	P120	19	4	351
ISONEW	2015-06-04	14:39:53	53	5	P120	19	5	142
ISONEW	2015-06-04	14:39:53	46	1	P120	19	6	60
ISONEW	2015-06-04	14:39:53	15	2	P120	19	7	355
ISONEW	2015-06-04	14:39:53	56	3	P120	19	8	103
ISONEW	2015-06-04	14:39:53	49	1	NOSTIM	20	1	0
ISONEW	2015-06-04	14:39:53	18	2	NOSTIM	20	2	0
ISONEW	2015-06-04	14:39:53	27	3	NOSTIM	20	3	0
ISONEW	2015-06-04	14:39:53	36	4	NOSTIM	20	4	0
ISONEW	2015-06-04	14:39:53	53	5	NOSTIM	20	5	5
ISONEW	2015-06-04	14:39:53	46	1	NOSTIM	20	6	0
ISONEW	2015-06-04	14:39:53	15	2	NOSTIM	20	7	0
ISONEW	2015-06-04	14:39:53	56	3	NOSTIM	20	8	0
ISONEW	2015-06-04	14:39:53	49	1	PP6P120	21	1	8
ISONEW	2015-06-04	14:39:53	18	2	PP6P120	21	2	142
ISONEW	2015-06-04	14:39:53	27	3	PP6P120	21	3	231
ISONEW	2015-06-04	14:39:53	36	4	PP6P120	21	4	190
ISONEW	2015-06-04	14:39:53	53	5	PP6P120	21	5	281
ISONEW	2015-06-04	14:39:53	46	1	PP6P120	21	6	38
ISONEW	2015-06-04	14:39:53	15	2	PP6P120	21	7	30
ISONEW	2015-06-04	14:39:53	56	3	PP6P120	21	8	62
ISONEW	2015-06-04	14:39:53	49	1	NOSTIM	22	1	0
ISONEW	2015-06-04	14:39:53	18	2	NOSTIM	22	2	0
ISONEW	2015-06-04	14:39:53	27	3	NOSTIM	22	3	0
ISONEW	2015-06-04	14:39:53	36	4	NOSTIM	22	4	1
ISONEW	2015-06-04	14:39:53	53	5	NOSTIM	22	5	3
ISONEW	2015-06-04	14:39:53	46	1	NOSTIM	22	6	0
ISONEW	2015-06-04	14:39:53	15	2	NOSTIM	22	7	0
ISONEW	2015-06-04	14:39:53	56	3	NOSTIM	22	8	0
ISONEW	2015-06-04	14:39:53	49	1	PP3P120	23	1	19
ISONEW	2015-06-04	14:39:53	18	2	PP3P120	23	2	118
ISONEW	2015-06-04	14:39:53	27	3	PP3P120	23	3	355
ISONEW	2015-06-04	14:39:53	36	4	PP3P120	23	4	303
ISONEW	2015-06-04	14:39:53	53	5	PP3P120	23	5	248
ISONEW	2015-06-04	14:39:53	46	1	PP3P120	23	6	43
ISONEW	2015-06-04	14:39:53	15	2	PP3P120	23	7	50
ISONEW	2015-06-04	14:39:53	56	3	PP3P120	23	8	80
ISONEW	2015-06-04	14:39:53	49	1	NOSTIM	24	1	0
ISONEW	2015-06-04	14:39:53	18	2	NOSTIM	24	2	0
ISONEW	2015-06-04	14:39:53	27	3	NOSTIM	24	3	0
ISONEW	2015-06-04	14:39:53	36	4	NOSTIM	24	4	0
ISONEW	2015-06-04	14:39:53	53	5	NOSTIM	24	5	0
ISONEW	2015-06-04	14:39:53	46	1	NOSTIM	24	6	0
ISONEW	2015-06-04	14:39:53	15	2	NOSTIM	24	7	0
ISONEW	2015-06-04	14:39:53	56	3	NOSTIM	24	8	0
ISONEW	2015-06-04	14:39:53	49	1	PP6P120	25	1	13
ISONEW	2015-06-04	14:39:53	18	2	PP6P120	25	2	131
ISONEW	2015-06-04	14:39:53	27	3	PP6P120	25	3	147
ISONEW	2015-06-04	14:39:53	36	4	PP6P120	25	4	162
ISONEW	2015-06-04	14:39:53	53	5	PP6P120	25	5	164
ISONEW	2015-06-04	14:39:53	46	1	PP6P120	25	6	39
ISONEW	2015-06-04	14:39:53	15	2	PP6P120	25	7	47
ISONEW	2015-06-04	14:39:53	56	3	PP6P120	25	8	42
ISONEW	2015-06-04	14:39:53	49	1	NOSTIM	26	1	0
ISONEW	2015-06-04	14:39:53	18	2	NOSTIM	26	2	0
ISONEW	2015-06-04	14:39:53	27	3	NOSTIM	26	3	0
ISONEW	2015-06-04	14:39:53	36	4	NOSTIM	26	4	0
ISONEW	2015-06-04	14:39:53	53	5	NOSTIM	26	5	3
ISONEW	2015-06-04	14:39:53	46	1	NOSTIM	26	6	0
ISONEW	2015-06-04	14:39:53	15	2	NOSTIM	26	7	0
ISONEW	2015-06-04	14:39:53	56	3	NOSTIM	26	8	0
ISONEW	2015-06-04	14:39:53	49	1	P120	27	1	28
ISONEW	2015-06-04	14:39:53	18	2	P120	27	2	675
ISONEW	2015-06-04	14:39:53	27	3	P120	27	3	249
ISONEW	2015-06-04	14:39:53	36	4	P120	27	4	477
ISONEW	2015-06-04	14:39:53	53	5	P120	27	5	304
ISONEW	2015-06-04	14:39:53	46	1	P120	27	6	56
ISONEW	2015-06-04	14:39:53	15	2	P120	27	7	62
ISONEW	2015-06-04	14:39:53	56	3	P120	27	8	223
ISONEW	2015-06-04	14:39:53	49	1	NOSTIM	28	1	0
ISONEW	2015-06-04	14:39:53	18	2	NOSTIM	28	2	0
ISONEW	2015-06-04	14:39:53	27	3	NOSTIM	28	3	0
ISONEW	2015-06-04	14:39:53	36	4	NOSTIM	28	4	3
ISONEW	2015-06-04	14:39:53	53	5	NOSTIM	28	5	0
ISONEW	2015-06-04	14:39:53	46	1	NOSTIM	28	6	0
ISONEW	2015-06-04	14:39:53	15	2	NOSTIM	28	7	0
ISONEW	2015-06-04	14:39:53	56	3	NOSTIM	28	8	0
ISONEW	2015-06-04	14:39:53	49	1	PP12P120	29	1	0
ISONEW	2015-06-04	14:39:53	18	2	PP12P120	29	2	20
ISONEW	2015-06-04	14:39:53	27	3	PP12P120	29	3	62
ISONEW	2015-06-04	14:39:53	36	4	PP12P120	29	4	236
ISONEW	2015-06-04	14:39:53	53	5	PP12P120	29	5	169
ISONEW	2015-06-04	14:39:53	46	1	PP12P120	29	6	1
ISONEW	2015-06-04	14:39:53	15	2	PP12P120	29	7	7
ISONEW	2015-06-04	14:39:53	56	3	PP12P120	29	8	66
ISONEW	2015-06-04	14:39:53	49	1	NOSTIM	30	1	0
ISONEW	2015-06-04	14:39:53	18	2	NOSTIM	30	2	0
ISONEW	2015-06-04	14:39:53	27	3	NOSTIM	30	3	0
ISONEW	2015-06-04	14:39:53	36	4	NOSTIM	30	4	0
ISONEW	2015-06-04	14:39:53	53	5	NOSTIM	30	5	5
ISONEW	2015-06-04	14:39:53	46	1	NOSTIM	30	6	0
ISONEW	2015-06-04	14:39:53	15	2	NOSTIM	30	7	0
ISONEW	2015-06-04	14:39:53	56	3	NOSTIM	30	8	0
ISONEW	2015-06-04	14:39:53	49	1	P120	31	1	61
ISONEW	2015-06-04	14:39:53	18	2	P120	31	2	226
ISONEW	2015-06-04	14:39:53	27	3	P120	31	3	512
ISONEW	2015-06-04	14:39:53	36	4	P120	31	4	418
ISONEW	2015-06-04	14:39:53	53	5	P120	31	5	277
ISONEW	2015-06-04	14:39:53	46	1	P120	31	6	67
ISONEW	2015-06-04	14:39:53	15	2	P120	31	7	63
ISONEW	2015-06-04	14:39:53	56	3	P120	31	8	204
ISONEW	2015-06-04	14:39:53	49	1	NOSTIM	32	1	0
ISONEW	2015-06-04	14:39:53	18	2	NOSTIM	32	2	0
ISONEW	2015-06-04	14:39:53	27	3	NOSTIM	32	3	0
ISONEW	2015-06-04	14:39:53	36	4	NOSTIM	32	4	0
ISONEW	2015-06-04	14:39:53	53	5	NOSTIM	32	5	7
ISONEW	2015-06-04	14:39:53	46	1	NOSTIM	32	6	0
ISONEW	2015-06-04	14:39:53	15	2	NOSTIM	32	7	0
ISONEW	2015-06-04	14:39:53	56	3	NOSTIM	32	8	0
ISONEW	2015-06-04	14:39:53	49	1	PP3P120	33	1	51
ISONEW	2015-06-04	14:39:53	18	2	PP3P120	33	2	206
ISONEW	2015-06-04	14:39:53	27	3	PP3P120	33	3	252
ISONEW	2015-06-04	14:39:53	36	4	PP3P120	33	4	285
ISONEW	2015-06-04	14:39:53	53	5	PP3P120	33	5	134
ISONEW	2015-06-04	14:39:53	46	1	PP3P120	33	6	17
ISONEW	2015-06-04	14:39:53	15	2	PP3P120	33	7	23
ISONEW	2015-06-04	14:39:53	56	3	PP3P120	33	8	23
ISONEW	2015-06-04	14:39:53	49	1	NOSTIM	34	1	0
ISONEW	2015-06-04	14:39:53	18	2	NOSTIM	34	2	0
ISONEW	2015-06-04	14:39:53	27	3	NOSTIM	34	3	0
ISONEW	2015-06-04	14:39:53	36	4	NOSTIM	34	4	0
ISONEW	2015-06-04	14:39:53	53	5	NOSTIM	34	5	13
ISONEW	2015-06-04	14:39:53	46	1	NOSTIM	34	6	0
ISONEW	2015-06-04	14:39:53	15	2	NOSTIM	34	7	0
ISONEW	2015-06-04	14:39:53	56	3	NOSTIM	34	8	0
ISONEW	2015-06-04	14:39:53	49	1	PP12P120	35	1	4
ISONEW	2015-06-04	14:39:53	18	2	PP12P120	35	2	179
ISONEW	2015-06-04	14:39:53	27	3	PP12P120	35	3	83
ISONEW	2015-06-04	14:39:53	36	4	PP12P120	35	4	41
ISONEW	2015-06-04	14:39:53	53	5	PP12P120	35	5	57
ISONEW	2015-06-04	14:39:53	46	1	PP12P120	35	6	48
ISONEW	2015-06-04	14:39:53	15	2	PP12P120	35	7	7
ISONEW	2015-06-04	14:39:53	56	3	PP12P120	35	8	20
ISONEW	2015-06-04	14:39:53	49	1	NOSTIM	36	1	0
ISONEW	2015-06-04	14:39:53	18	2	NOSTIM	36	2	0
ISONEW	2015-06-04	14:39:53	27	3	NOSTIM	36	3	0
ISONEW	2015-06-04	14:39:53	36	4	NOSTIM	36	4	3
ISONEW	2015-06-04	14:39:53	53	5	NOSTIM	36	5	2
ISONEW	2015-06-04	14:39:53	46	1	NOSTIM	36	6	0
ISONEW	2015-06-04	14:39:53	15	2	NOSTIM	36	7	0
ISONEW	2015-06-04	14:39:53	56	3	NOSTIM	36	8	0
ISONEW	2015-06-04	14:39:53	49	1	PP3P120	37	1	8
ISONEW	2015-06-04	14:39:53	18	2	PP3P120	37	2	158
ISONEW	2015-06-04	14:39:53	27	3	PP3P120	37	3	304
ISONEW	2015-06-04	14:39:53	36	4	PP3P120	37	4	480
ISONEW	2015-06-04	14:39:53	53	5	PP3P120	37	5	89
ISONEW	2015-06-04	14:39:53	46	1	PP3P120	37	6	21
ISONEW	2015-06-04	14:39:53	15	2	PP3P120	37	7	16
ISONEW	2015-06-04	14:39:53	56	3	PP3P120	37	8	208
ISONEW	2015-06-04	14:39:53	49	1	NOSTIM	38	1	0
ISONEW	2015-06-04	14:39:53	18	2	NOSTIM	38	2	0
ISONEW	2015-06-04	14:39:53	27	3	NOSTIM	38	3	0
ISONEW	2015-06-04	14:39:53	36	4	NOSTIM	38	4	0
ISONEW	2015-06-04	14:39:53	53	5	NOSTIM	38	5	3
ISONEW	2015-06-04	14:39:53	46	1	NOSTIM	38	6	0
ISONEW	2015-06-04	14:39:53	15	2	NOSTIM	38	7	0
ISONEW	2015-06-04	14:39:53	56	3	NOSTIM	38	8	0
ISONEW	2015-06-04	14:39:53	49	1	PP12P120	39	1	1
ISONEW	2015-06-04	14:39:53	18	2	PP12P120	39	2	30
ISONEW	2015-06-04	14:39:53	27	3	PP12P120	39	3	105
ISONEW	2015-06-04	14:39:53	36	4	PP12P120	39	4	248
ISONEW	2015-06-04	14:39:53	53	5	PP12P120	39	5	66
ISONEW	2015-06-04	14:39:53	46	1	PP12P120	39	6	12
ISONEW	2015-06-04	14:39:53	15	2	PP12P120	39	7	23
ISONEW	2015-06-04	14:39:53	56	3	PP12P120	39	8	74
ISONEW	2015-06-04	14:39:53	49	1	NOSTIM	40	1	0
ISONEW	2015-06-04	14:39:53	18	2	NOSTIM	40	2	0
ISONEW	2015-06-04	14:39:53	27	3	NOSTIM	40	3	0
ISONEW	2015-06-04	14:39:53	36	4	NOSTIM	40	4	3
ISONEW	2015-06-04	14:39:53	53	5	NOSTIM	40	5	10
ISONEW	2015-06-04	14:39:53	46	1	NOSTIM	40	6	0
ISONEW	2015-06-04	14:39:53	15	2	NOSTIM	40	7	0
ISONEW	2015-06-04	14:39:53	56	3	NOSTIM	40	8	0
ISONEW	2015-06-04	14:39:53	49	1	PP6P120	41	1	13
ISONEW	2015-06-04	14:39:53	18	2	PP6P120	41	2	42
ISONEW	2015-06-04	14:39:53	27	3	PP6P120	41	3	176
ISONEW	2015-06-04	14:39:53	36	4	PP6P120	41	4	218
ISONEW	2015-06-04	14:39:53	53	5	PP6P120	41	5	165
ISONEW	2015-06-04	14:39:53	46	1	PP6P120	41	6	11
ISONEW	2015-06-04	14:39:53	15	2	PP6P120	41	7	27
ISONEW	2015-06-04	14:39:53	56	3	PP6P120	41	8	58
ISONEW	2015-06-04	14:39:53	49	1	NOSTIM	42	1	0
ISONEW	2015-06-04	14:39:53	18	2	NOSTIM	42	2	0
ISONEW	2015-06-04	14:39:53	27	3	NOSTIM	42	3	0
ISONEW	2015-06-04	14:39:53	36	4	NOSTIM	42	4	5
ISONEW	2015-06-04	14:39:53	53	5	NOSTIM	42	5	11
ISONEW	2015-06-04	14:39:53	46	1	NOSTIM	42	6	0
ISONEW	2015-06-04	14:39:53	15	2	NOSTIM	42	7	1
ISONEW	2015-06-04	14:39:53	56	3	NOSTIM	42	8	0
ISONEW	2015-06-04	14:39:53	49	1	P120	43	1	108
ISONEW	2015-06-04	14:39:53	18	2	P120	43	2	12
ISONEW	2015-06-04	14:39:53	27	3	P120	43	3	393
ISONEW	2015-06-04	14:39:53	36	4	P120	43	4	438
ISONEW	2015-06-04	14:39:53	53	5	P120	43	5	184
ISONEW	2015-06-04	14:39:53	46	1	P120	43	6	23
ISONEW	2015-06-04	14:39:53	15	2	P120	43	7	86
ISONEW	2015-06-04	14:39:53	56	3	P120	43	8	300
ISONEW	2015-06-04	14:39:53	49	1	NOSTIM	44	1	0
ISONEW	2015-06-04	14:39:53	18	2	NOSTIM	44	2	0
ISONEW	2015-06-04	14:39:53	27	3	NOSTIM	44	3	0
ISONEW	2015-06-04	14:39:53	36	4	NOSTIM	44	4	8
ISONEW	2015-06-04	14:39:53	53	5	NOSTIM	44	5	0
ISONEW	2015-06-04	14:39:53	46	1	NOSTIM	44	6	0
ISONEW	2015-06-04	14:39:53	15	2	NOSTIM	44	7	3
ISONEW	2015-06-04	14:39:53	56	3	NOSTIM	44	8	0
ISONEW	2015-06-04	14:39:53	49	1	PP3P120	45	1	27
ISONEW	2015-06-04	14:39:53	18	2	PP3P120	45	2	39
ISONEW	2015-06-04	14:39:53	27	3	PP3P120	45	3	144
ISONEW	2015-06-04	14:39:53	36	4	PP3P120	45	4	244
ISONEW	2015-06-04	14:39:53	53	5	PP3P120	45	5	269
ISONEW	2015-06-04	14:39:53	46	1	PP3P120	45	6	38
ISONEW	2015-06-04	14:39:53	15	2	PP3P120	45	7	22
ISONEW	2015-06-04	14:39:53	56	3	PP3P120	45	8	62
ISONEW	2015-06-04	14:39:53	49	1	NOSTIM	46	1	0
ISONEW	2015-06-04	14:39:53	18	2	NOSTIM	46	2	0
ISONEW	2015-06-04	14:39:53	27	3	NOSTIM	46	3	0
ISONEW	2015-06-04	14:39:53	36	4	NOSTIM	46	4	9
ISONEW	2015-06-04	14:39:53	53	5	NOSTIM	46	5	5
ISONEW	2015-06-04	14:39:53	46	1	NOSTIM	46	6	0
ISONEW	2015-06-04	14:39:53	15	2	NOSTIM	46	7	6
ISONEW	2015-06-04	14:39:53	56	3	NOSTIM	46	8	0
ISONEW	2015-06-04	14:39:53	49	1	PP12P120	47	1	0
ISONEW	2015-06-04	14:39:53	18	2	PP12P120	47	2	4
ISONEW	2015-06-04	14:39:53	27	3	PP12P120	47	3	30
ISONEW	2015-06-04	14:39:53	36	4	PP12P120	47	4	149
ISONEW	2015-06-04	14:39:53	53	5	PP12P120	47	5	108
ISONEW	2015-06-04	14:39:53	46	1	PP12P120	47	6	6
ISONEW	2015-06-04	14:39:53	15	2	PP12P120	47	7	14
ISONEW	2015-06-04	14:39:53	56	3	PP12P120	47	8	63
ISONEW	2015-06-04	14:39:53	49	1	NOSTIM	48	1	0
ISONEW	2015-06-04	14:39:53	18	2	NOSTIM	48	2	0
ISONEW	2015-06-04	14:39:53	27	3	NOSTIM	48	3	0
ISONEW	2015-06-04	14:39:53	36	4	NOSTIM	48	4	0
ISONEW	2015-06-04	14:39:53	53	5	NOSTIM	48	5	0
ISONEW	2015-06-04	14:39:53	46	1	NOSTIM	48	6	0
ISONEW	2015-06-04	14:39:53	15	2	NOSTIM	48	7	0
ISONEW	2015-06-04	14:39:53	56	3	NOSTIM	48	8	0
ISONEW	2015-06-04	14:39:53	49	1	PP6P120	49	1	25
ISONEW	2015-06-04	14:39:53	18	2	PP6P120	49	2	18
ISONEW	2015-06-04	14:39:53	27	3	PP6P120	49	3	77
ISONEW	2015-06-04	14:39:53	36	4	PP6P120	49	4	203
ISONEW	2015-06-04	14:39:53	53	5	PP6P120	49	5	132
ISONEW	2015-06-04	14:39:53	46	1	PP6P120	49	6	7
ISONEW	2015-06-04	14:39:53	15	2	PP6P120	49	7	11
ISONEW	2015-06-04	14:39:53	56	3	PP6P120	49	8	80
ISONEW	2015-06-04	14:39:53	49	1	NOSTIM	50	1	0
ISONEW	2015-06-04	14:39:53	18	2	NOSTIM	50	2	0
ISONEW	2015-06-04	14:39:53	27	3	NOSTIM	50	3	0
ISONEW	2015-06-04	14:39:53	36	4	NOSTIM	50	4	10
ISONEW	2015-06-04	14:39:53	53	5	NOSTIM	50	5	5
ISONEW	2015-06-04	14:39:53	46	1	NOSTIM	50	6	0
ISONEW	2015-06-04	14:39:53	15	2	NOSTIM	50	7	0
ISONEW	2015-06-04	14:39:53	56	3	NOSTIM	50	8	0
ISONEW	2015-06-04	14:39:53	49	1	P120	51	1	26
ISONEW	2015-06-04	14:39:53	18	2	P120	51	2	181
ISONEW	2015-06-04	14:39:53	27	3	P120	51	3	366
ISONEW	2015-06-04	14:39:53	36	4	P120	51	4	523
ISONEW	2015-06-04	14:39:53	53	5	P120	51	5	114
ISONEW	2015-06-04	14:39:53	46	1	P120	51	6	121
ISONEW	2015-06-04	14:39:53	15	2	P120	51	7	32
ISONEW	2015-06-04	14:39:53	56	3	P120	51	8	146
ISONEW	2015-06-04	14:39:53	49	1	NOSTIM	52	1	0
ISONEW	2015-06-04	14:39:53	18	2	NOSTIM	52	2	0
ISONEW	2015-06-04	14:39:53	27	3	NOSTIM	52	3	0
ISONEW	2015-06-04	14:39:53	36	4	NOSTIM	52	4	2
ISONEW	2015-06-04	14:39:53	53	5	NOSTIM	52	5	2
ISONEW	2015-06-04	14:39:53	46	1	NOSTIM	52	6	0
ISONEW	2015-06-04	14:39:53	15	2	NOSTIM	52	7	0
ISONEW	2015-06-04	14:39:53	56	3	NOSTIM	52	8	6
ISONEW	2015-06-04	14:39:53	49	1	PP3P120	53	1	0
ISONEW	2015-06-04	14:39:53	18	2	PP3P120	53	2	156
ISONEW	2015-06-04	14:39:53	27	3	PP3P120	53	3	144
ISONEW	2015-06-04	14:39:53	36	4	PP3P120	53	4	175
ISONEW	2015-06-04	14:39:53	53	5	PP3P120	53	5	76
ISONEW	2015-06-04	14:39:53	46	1	PP3P120	53	6	14
ISONEW	2015-06-04	14:39:53	15	2	PP3P120	53	7	14
ISONEW	2015-06-04	14:39:53	56	3	PP3P120	53	8	79
ISONEW	2015-06-04	14:39:53	49	1	NOSTIM	54	1	0
ISONEW	2015-06-04	14:39:53	18	2	NOSTIM	54	2	0
ISONEW	2015-06-04	14:39:53	27	3	NOSTIM	54	3	0
ISONEW	2015-06-04	14:39:53	36	4	NOSTIM	54	4	2
ISONEW	2015-06-04	14:39:53	53	5	NOSTIM	54	5	9
ISONEW	2015-06-04	14:39:53	46	1	NOSTIM	54	6	0
ISONEW	2015-06-04	14:39:53	15	2	NOSTIM	54	7	0
ISONEW	2015-06-04	14:39:53	56	3	NOSTIM	54	8	0
ISONEW	2015-06-04	14:39:53	49	1	PP12P120	55	1	0
ISONEW	2015-06-04	14:39:53	18	2	PP12P120	55	2	32
ISONEW	2015-06-04	14:39:53	27	3	PP12P120	55	3	20
ISONEW	2015-06-04	14:39:53	36	4	PP12P120	55	4	33
ISONEW	2015-06-04	14:39:53	53	5	PP12P120	55	5	143
ISONEW	2015-06-04	14:39:53	46	1	PP12P120	55	6	61
ISONEW	2015-06-04	14:39:53	15	2	PP12P120	55	7	0
ISONEW	2015-06-04	14:39:53	56	3	PP12P120	55	8	25
ISONEW	2015-06-04	14:39:53	49	1	NOSTIM	56	1	0
ISONEW	2015-06-04	14:39:53	18	2	NOSTIM	56	2	0
ISONEW	2015-06-04	14:39:53	27	3	NOSTIM	56	3	0
ISONEW	2015-06-04	14:39:53	36	4	NOSTIM	56	4	10
ISONEW	2015-06-04	14:39:53	53	5	NOSTIM	56	5	2
ISONEW	2015-06-04	14:39:53	46	1	NOSTIM	56	6	0
ISONEW	2015-06-04	14:39:53	15	2	NOSTIM	56	7	0
ISONEW	2015-06-04	14:39:53	56	3	NOSTIM	56	8	3
ISONEW	2015-06-04	14:39:53	49	1	P120	57	1	27
ISONEW	2015-06-04	14:39:53	18	2	P120	57	2	300
ISONEW	2015-06-04	14:39:53	27	3	P120	57	3	305
ISONEW	2015-06-04	14:39:53	36	4	P120	57	4	539
ISONEW	2015-06-04	14:39:53	53	5	P120	57	5	303
ISONEW	2015-06-04	14:39:53	46	1	P120	57	6	78
ISONEW	2015-06-04	14:39:53	15	2	P120	57	7	9
ISONEW	2015-06-04	14:39:53	56	3	P120	57	8	195
ISONEW	2015-06-04	14:39:53	49	1	NOSTIM	58	1	0
ISONEW	2015-06-04	14:39:53	18	2	NOSTIM	58	2	0
ISONEW	2015-06-04	14:39:53	27	3	NOSTIM	58	3	0
ISONEW	2015-06-04	14:39:53	36	4	NOSTIM	58	4	7
ISONEW	2015-06-04	14:39:53	53	5	NOSTIM	58	5	2
ISONEW	2015-06-04	14:39:53	46	1	NOSTIM	58	6	0
ISONEW	2015-06-04	14:39:53	15	2	NOSTIM	58	7	0
ISONEW	2015-06-04	14:39:53	56	3	NOSTIM	58	8	0
ISONEW	2015-06-04	14:39:53	49	1	PP6P120	59	1	2
ISONEW	2015-06-04	14:39:53	18	2	PP6P120	59	2	8
ISONEW	2015-06-04	14:39:53	27	3	PP6P120	59	3	226
ISONEW	2015-06-04	14:39:53	36	4	PP6P120	59	4	194
ISONEW	2015-06-04	14:39:53	53	5	PP6P120	59	5	98
ISONEW	2015-06-04	14:39:53	46	1	PP6P120	59	6	13
ISONEW	2015-06-04	14:39:53	15	2	PP6P120	59	7	17
ISONEW	2015-06-04	14:39:53	56	3	PP6P120	59	8	126
ISONEW	2015-06-04	14:39:53	49	1	NOSTIM	60	1	0
ISONEW	2015-06-04	14:39:53	18	2	NOSTIM	60	2	0
ISONEW	2015-06-04	14:39:53	27	3	NOSTIM	60	3	0
ISONEW	2015-06-04	14:39:53	36	4	NOSTIM	60	4	9
ISONEW	2015-06-04	14:39:53	53	5	NOSTIM	60	5	0
ISONEW	2015-06-04	14:39:53	46	1	NOSTIM	60	6	0
ISONEW	2015-06-04	14:39:53	15	2	NOSTIM	60	7	2
ISONEW	2015-06-04	14:39:53	56	3	NOSTIM	60	8	1
ISONEW	2015-06-04	14:39:53	49	1	PP6P120	61	1	0
ISONEW	2015-06-04	14:39:53	18	2	PP6P120	61	2	379
ISONEW	2015-06-04	14:39:53	27	3	PP6P120	61	3	52
ISONEW	2015-06-04	14:39:53	36	4	PP6P120	61	4	292
ISONEW	2015-06-04	14:39:53	53	5	PP6P120	61	5	68
ISONEW	2015-06-04	14:39:53	46	1	PP6P120	61	6	46
ISONEW	2015-06-04	14:39:53	15	2	PP6P120	61	7	13
ISONEW	2015-06-04	14:39:53	56	3	PP6P120	61	8	90
ISONEW	2015-06-04	14:39:53	49	1	NOSTIM	62	1	0
ISONEW	2015-06-04	14:39:53	18	2	NOSTIM	62	2	0
ISONEW	2015-06-04	14:39:53	27	3	NOSTIM	62	3	0
ISONEW	2015-06-04	14:39:53	36	4	NOSTIM	62	4	1
ISONEW	2015-06-04	14:39:53	53	5	NOSTIM	62	5	11
ISONEW	2015-06-04	14:39:53	46	1	NOSTIM	62	6	0
ISONEW	2015-06-04	14:39:53	15	2	NOSTIM	62	7	0
ISONEW	2015-06-04	14:39:53	56	3	NOSTIM	62	8	0
ISONEW	2015-06-04	14:39:53	49	1	PP12P120	63	1	0
ISONEW	2015-06-04	14:39:53	18	2	PP12P120	63	2	12
ISONEW	2015-06-04	14:39:53	27	3	PP12P120	63	3	52
ISONEW	2015-06-04	14:39:53	36	4	PP12P120	63	4	130
ISONEW	2015-06-04	14:39:53	53	5	PP12P120	63	5	127
ISONEW	2015-06-04	14:39:53	46	1	PP12P120	63	6	17
ISONEW	2015-06-04	14:39:53	15	2	PP12P120	63	7	6
ISONEW	2015-06-04	14:39:53	56	3	PP12P120	63	8	29
ISONEW	2015-06-04	14:39:53	49	1	NOSTIM	64	1	0
ISONEW	2015-06-04	14:39:53	18	2	NOSTIM	64	2	0
ISONEW	2015-06-04	14:39:53	27	3	NOSTIM	64	3	0
ISONEW	2015-06-04	14:39:53	36	4	NOSTIM	64	4	4
ISONEW	2015-06-04	14:39:53	53	5	NOSTIM	64	5	0
ISONEW	2015-06-04	14:39:53	46	1	NOSTIM	64	6	0
ISONEW	2015-06-04	14:39:53	15	2	NOSTIM	64	7	0
ISONEW	2015-06-04	14:39:53	56	3	NOSTIM	64	8	0
ISONEW	2015-06-04	14:39:53	49	1	PP3P120	65	1	1
ISONEW	2015-06-04	14:39:53	18	2	PP3P120	65	2	39
ISONEW	2015-06-04	14:39:53	27	3	PP3P120	65	3	150
ISONEW	2015-06-04	14:39:53	36	4	PP3P120	65	4	235
ISONEW	2015-06-04	14:39:53	53	5	PP3P120	65	5	127
ISONEW	2015-06-04	14:39:53	46	1	PP3P120	65	6	33
ISONEW	2015-06-04	14:39:53	15	2	PP3P120	65	7	104
ISONEW	2015-06-04	14:39:53	56	3	PP3P120	65	8	121
ISONEW	2015-06-04	14:39:53	49	1	NOSTIM	66	1	0
ISONEW	2015-06-04	14:39:53	18	2	NOSTIM	66	2	0
ISONEW	2015-06-04	14:39:53	27	3	NOSTIM	66	3	0
ISONEW	2015-06-04	14:39:53	36	4	NOSTIM	66	4	0
ISONEW	2015-06-04	14:39:53	53	5	NOSTIM	66	5	6
ISONEW	2015-06-04	14:39:53	46	1	NOSTIM	66	6	0
ISONEW	2015-06-04	14:39:53	15	2	NOSTIM	66	7	0
ISONEW	2015-06-04	14:39:53	56	3	NOSTIM	66	8	0
ISONEW	2015-06-04	14:39:53	49	1	P120	67	1	124
ISONEW	2015-06-04	14:39:53	18	2	P120	67	2	252
ISONEW	2015-06-04	14:39:53	27	3	P120	67	3	216
ISONEW	2015-06-04	14:39:53	36	4	P120	67	4	273
ISONEW	2015-06-04	14:39:53	53	5	P120	67	5	163
ISONEW	2015-06-04	14:39:53	46	1	P120	67	6	74
ISONEW	2015-06-04	14:39:53	15	2	P120	67	7	30
ISONEW	2015-06-04	14:39:53	56	3	P120	67	8	312
ISONEW	2015-06-04	14:39:53	49	1	NOSTIM	68	1	0
ISONEW	2015-06-04	14:39:53	18	2	NOSTIM	68	2	0
ISONEW	2015-06-04	14:39:53	27	3	NOSTIM	68	3	0
ISONEW	2015-06-04	14:39:53	36	4	NOSTIM	68	4	18
ISONEW	2015-06-04	14:39:53	53	5	NOSTIM	68	5	0
ISONEW	2015-06-04	14:39:53	46	1	NOSTIM	68	6	0
ISONEW	2015-06-04	14:39:53	15	2	NOSTIM	68	7	0
ISONEW	2015-06-04	14:39:53	56	3	NOSTIM	68	8	0
ISONEW	2015-06-04	14:39:53	49	1	PP6P120	69	1	4
ISONEW	2015-06-04	14:39:53	18	2	PP6P120	69	2	43
ISONEW	2015-06-04	14:39:53	27	3	PP6P120	69	3	123
ISONEW	2015-06-04	14:39:53	36	4	PP6P120	69	4	291
ISONEW	2015-06-04	14:39:53	53	5	PP6P120	69	5	86
ISONEW	2015-06-04	14:39:53	46	1	PP6P120	69	6	15
ISONEW	2015-06-04	14:39:53	15	2	PP6P120	69	7	18
ISONEW	2015-06-04	14:39:53	56	3	PP6P120	69	8	57
ISONEW	2015-06-04	14:39:53	49	1	NOSTIM	70	1	0
ISONEW	2015-06-04	14:39:53	18	2	NOSTIM	70	2	0
ISONEW	2015-06-04	14:39:53	27	3	NOSTIM	70	3	0
ISONEW	2015-06-04	14:39:53	36	4	NOSTIM	70	4	0
ISONEW	2015-06-04	14:39:53	53	5	NOSTIM	70	5	7
ISONEW	2015-06-04	14:39:53	46	1	NOSTIM	70	6	0
ISONEW	2015-06-04	14:39:53	15	2	NOSTIM	70	7	1
ISONEW	2015-06-04	14:39:53	56	3	NOSTIM	70	8	0
ISONEW	2015-06-04	14:39:53	49	1	PP3P120	71	1	19
ISONEW	2015-06-04	14:39:53	18	2	PP3P120	71	2	20
ISONEW	2015-06-04	14:39:53	27	3	PP3P120	71	3	255
ISONEW	2015-06-04	14:39:53	36	4	PP3P120	71	4	161
ISONEW	2015-06-04	14:39:53	53	5	PP3P120	71	5	103
ISONEW	2015-06-04	14:39:53	46	1	PP3P120	71	6	74
ISONEW	2015-06-04	14:39:53	15	2	PP3P120	71	7	15
ISONEW	2015-06-04	14:39:53	56	3	PP3P120	71	8	123
ISONEW	2015-06-04	14:39:53	49	1	NOSTIM	72	1	0
ISONEW	2015-06-04	14:39:53	18	2	NOSTIM	72	2	0
ISONEW	2015-06-04	14:39:53	27	3	NOSTIM	72	3	0
ISONEW	2015-06-04	14:39:53	36	4	NOSTIM	72	4	3
ISONEW	2015-06-04	14:39:53	53	5	NOSTIM	72	5	14
ISONEW	2015-06-04	14:39:53	46	1	NOSTIM	72	6	0
ISONEW	2015-06-04	14:39:53	15	2	NOSTIM	72	7	1
ISONEW	2015-06-04	14:39:53	56	3	NOSTIM	72	8	0
ISONEW	2015-06-04	14:39:53	49	1	PP6P120	73	1	2
ISONEW	2015-06-04	14:39:53	18	2	PP6P120	73	2	34
ISONEW	2015-06-04	14:39:53	27	3	PP6P120	73	3	107
ISONEW	2015-06-04	14:39:53	36	4	PP6P120	73	4	165
ISONEW	2015-06-04	14:39:53	53	5	PP6P120	73	5	259
ISONEW	2015-06-04	14:39:53	46	1	PP6P120	73	6	89
ISONEW	2015-06-04	14:39:53	15	2	PP6P120	73	7	29
ISONEW	2015-06-04	14:39:53	56	3	PP6P120	73	8	43
ISONEW	2015-06-04	14:39:53	49	1	NOSTIM	74	1	0
ISONEW	2015-06-04	14:39:53	18	2	NOSTIM	74	2	0
ISONEW	2015-06-04	14:39:53	27	3	NOSTIM	74	3	0
ISONEW	2015-06-04	14:39:53	36	4	NOSTIM	74	4	0
ISONEW	2015-06-04	14:39:53	53	5	NOSTIM	74	5	7
ISONEW	2015-06-04	14:39:53	46	1	NOSTIM	74	6	0
ISONEW	2015-06-04	14:39:53	15	2	NOSTIM	74	7	0
ISONEW	2015-06-04	14:39:53	56	3	NOSTIM	74	8	1
ISONEW	2015-06-04	14:39:53	49	1	P120	75	1	201
ISONEW	2015-06-04	14:39:53	18	2	P120	75	2	192
ISONEW	2015-06-04	14:39:53	27	3	P120	75	3	232
ISONEW	2015-06-04	14:39:53	36	4	P120	75	4	113
ISONEW	2015-06-04	14:39:53	53	5	P120	75	5	81
ISONEW	2015-06-04	14:39:53	46	1	P120	75	6	114
ISONEW	2015-06-04	14:39:53	15	2	P120	75	7	167
ISONEW	2015-06-04	14:39:53	56	3	P120	75	8	53
ISONEW	2015-06-04	14:39:53	49	1	NOSTIM	76	1	9
ISONEW	2015-06-04	14:39:53	18	2	NOSTIM	76	2	0
ISONEW	2015-06-04	14:39:53	27	3	NOSTIM	76	3	0
ISONEW	2015-06-04	14:39:53	36	4	NOSTIM	76	4	1
ISONEW	2015-06-04	14:39:53	53	5	NOSTIM	76	5	0
ISONEW	2015-06-04	14:39:53	46	1	NOSTIM	76	6	1
ISONEW	2015-06-04	14:39:53	15	2	NOSTIM	76	7	0
ISONEW	2015-06-04	14:39:53	56	3	NOSTIM	76	8	0
ISONEW	2015-06-04	14:39:53	49	1	PP12P120	77	1	18
ISONEW	2015-06-04	14:39:53	18	2	PP12P120	77	2	11
ISONEW	2015-06-04	14:39:53	27	3	PP12P120	77	3	32
ISONEW	2015-06-04	14:39:53	36	4	PP12P120	77	4	150
ISONEW	2015-06-04	14:39:53	53	5	PP12P120	77	5	36
ISONEW	2015-06-04	14:39:53	46	1	PP12P120	77	6	25
ISONEW	2015-06-04	14:39:53	15	2	PP12P120	77	7	11
ISONEW	2015-06-04	14:39:53	56	3	PP12P120	77	8	93
ISONEW	2015-06-04	14:39:53	49	1	NOSTIM	78	1	0
ISONEW	2015-06-04	14:39:53	18	2	NOSTIM	78	2	0
ISONEW	2015-06-04	14:39:53	27	3	NOSTIM	78	3	0
ISONEW	2015-06-04	14:39:53	36	4	NOSTIM	78	4	5
ISONEW	2015-06-04	14:39:53	53	5	NOSTIM	78	5	5
ISONEW	2015-06-04	14:39:53	46	1	NOSTIM	78	6	0
ISONEW	2015-06-04	14:39:53	15	2	NOSTIM	78	7	0
ISONEW	2015-06-04	14:39:53	56	3	NOSTIM	78	8	6
ISONEW	2015-06-04	14:39:53	49	1	P120	79	1	141
ISONEW	2015-06-04	14:39:53	18	2	P120	79	2	37
ISONEW	2015-06-04	14:39:53	27	3	P120	79	3	387
ISONEW	2015-06-04	14:39:53	36	4	P120	79	4	296
ISONEW	2015-06-04	14:39:53	53	5	P120	79	5	97
ISONEW	2015-06-04	14:39:53	46	1	P120	79	6	179
ISONEW	2015-06-04	14:39:53	15	2	P120	79	7	103
ISONEW	2015-06-04	14:39:53	56	3	P120	79	8	217
ISONEW	2015-06-04	14:39:53	49	1	NOSTIM	80	1	0
ISONEW	2015-06-04	14:39:53	18	2	NOSTIM	80	2	0
ISONEW	2015-06-04	14:39:53	27	3	NOSTIM	80	3	0
ISONEW	2015-06-04	14:39:53	36	4	NOSTIM	80	4	0
ISONEW	2015-06-04	14:39:53	53	5	NOSTIM	80	5	15
ISONEW	2015-06-04	14:39:53	46	1	NOSTIM	80	6	0
ISONEW	2015-06-04	14:39:53	15	2	NOSTIM	80	7	0
ISONEW	2015-06-04	14:39:53	56	3	NOSTIM	80	8	0
ISONEW	2015-06-04	14:39:53	49	1	PP3P120	81	1	24
ISONEW	2015-06-04	14:39:53	18	2	PP3P120	81	2	32
ISONEW	2015-06-04	14:39:53	27	3	PP3P120	81	3	141
ISONEW	2015-06-04	14:39:53	36	4	PP3P120	81	4	368
ISONEW	2015-06-04	14:39:53	53	5	PP3P120	81	5	102
ISONEW	2015-06-04	14:39:53	46	1	PP3P120	81	6	89
ISONEW	2015-06-04	14:39:53	15	2	PP3P120	81	7	25
ISONEW	2015-06-04	14:39:53	56	3	PP3P120	81	8	167
ISONEW	2015-06-04	14:39:53	49	1	NOSTIM	82	1	0
ISONEW	2015-06-04	14:39:53	18	2	NOSTIM	82	2	0
ISONEW	2015-06-04	14:39:53	27	3	NOSTIM	82	3	0
ISONEW	2015-06-04	14:39:53	36	4	NOSTIM	82	4	4
ISONEW	2015-06-04	14:39:53	53	5	NOSTIM	82	5	12
ISONEW	2015-06-04	14:39:53	46	1	NOSTIM	82	6	0
ISONEW	2015-06-04	14:39:53	15	2	NOSTIM	82	7	0
ISONEW	2015-06-04	14:39:53	56	3	NOSTIM	82	8	0
ISONEW	2015-06-04	14:39:53	49	1	PP12P120	83	1	7
ISONEW	2015-06-04	14:39:53	18	2	PP12P120	83	2	4
ISONEW	2015-06-04	14:39:53	27	3	PP12P120	83	3	35
ISONEW	2015-06-04	14:39:53	36	4	PP12P120	83	4	121
ISONEW	2015-06-04	14:39:53	53	5	PP12P120	83	5	33
ISONEW	2015-06-04	14:39:53	46	1	PP12P120	83	6	8
ISONEW	2015-06-04	14:39:53	15	2	PP12P120	83	7	27
ISONEW	2015-06-04	14:39:53	56	3	PP12P120	83	8	44
ISONEW	2015-06-04	14:39:53	49	1	NOSTIM	84	1	0
ISONEW	2015-06-04	14:39:53	18	2	NOSTIM	84	2	0
ISONEW	2015-06-04	14:39:53	27	3	NOSTIM	84	3	0
ISONEW	2015-06-04	14:39:53	36	4	NOSTIM	84	4	1
ISONEW	2015-06-04	14:39:53	53	5	NOSTIM	84	5	6
ISONEW	2015-06-04	14:39:53	46	1	NOSTIM	84	6	0
ISONEW	2015-06-04	14:39:53	15	2	NOSTIM	84	7	0
ISONEW	2015-06-04	14:39:53	56	3	NOSTIM	84	8	0
ISONEW	2015-06-04	14:39:53	49	1	PP3P120	85	1	4
ISONEW	2015-06-04	14:39:53	18	2	PP3P120	85	2	26
ISONEW	2015-06-04	14:39:53	27	3	PP3P120	85	3	232
ISONEW	2015-06-04	14:39:53	36	4	PP3P120	85	4	372
ISONEW	2015-06-04	14:39:53	53	5	PP3P120	85	5	100
ISONEW	2015-06-04	14:39:53	46	1	PP3P120	85	6	8
ISONEW	2015-06-04	14:39:53	15	2	PP3P120	85	7	23
ISONEW	2015-06-04	14:39:53	56	3	PP3P120	85	8	218
ISONEW	2015-06-04	14:39:53	49	1	NOSTIM	86	1	0
ISONEW	2015-06-04	14:39:53	18	2	NOSTIM	86	2	0
ISONEW	2015-06-04	14:39:53	27	3	NOSTIM	86	3	0
ISONEW	2015-06-04	14:39:53	36	4	NOSTIM	86	4	6
ISONEW	2015-06-04	14:39:53	53	5	NOSTIM	86	5	3
ISONEW	2015-06-04	14:39:53	46	1	NOSTIM	86	6	0
ISONEW	2015-06-04	14:39:53	15	2	NOSTIM	86	7	0
ISONEW	2015-06-04	14:39:53	56	3	NOSTIM	86	8	0
ISONEW	2015-06-04	14:39:53	49	1	PP12P120	87	1	7
ISONEW	2015-06-04	14:39:53	18	2	PP12P120	87	2	12
ISONEW	2015-06-04	14:39:53	27	3	PP12P120	87	3	61
ISONEW	2015-06-04	14:39:53	36	4	PP12P120	87	4	187
ISONEW	2015-06-04	14:39:53	53	5	PP12P120	87	5	59
ISONEW	2015-06-04	14:39:53	46	1	PP12P120	87	6	13
ISONEW	2015-06-04	14:39:53	15	2	PP12P120	87	7	26
ISONEW	2015-06-04	14:39:53	56	3	PP12P120	87	8	38
ISONEW	2015-06-04	14:39:53	49	1	NOSTIM	88	1	0
ISONEW	2015-06-04	14:39:53	18	2	NOSTIM	88	2	0
ISONEW	2015-06-04	14:39:53	27	3	NOSTIM	88	3	0
ISONEW	2015-06-04	14:39:53	36	4	NOSTIM	88	4	8
ISONEW	2015-06-04	14:39:53	53	5	NOSTIM	88	5	9
ISONEW	2015-06-04	14:39:53	46	1	NOSTIM	88	6	1
ISONEW	2015-06-04	14:39:53	15	2	NOSTIM	88	7	0
ISONEW	2015-06-04	14:39:53	56	3	NOSTIM	88	8	0
ISONEW	2015-06-04	14:39:53	49	1	PP6P120	89	1	8
ISONEW	2015-06-04	14:39:53	18	2	PP6P120	89	2	20
ISONEW	2015-06-04	14:39:53	27	3	PP6P120	89	3	150
ISONEW	2015-06-04	14:39:53	36	4	PP6P120	89	4	203
ISONEW	2015-06-04	14:39:53	53	5	PP6P120	89	5	351
ISONEW	2015-06-04	14:39:53	46	1	PP6P120	89	6	22
ISONEW	2015-06-04	14:39:53	15	2	PP6P120	89	7	20
ISONEW	2015-06-04	14:39:53	56	3	PP6P120	89	8	43
ISONEW	2015-06-04	14:39:53	49	1	NOSTIM	90	1	0
ISONEW	2015-06-04	14:39:53	18	2	NOSTIM	90	2	0
ISONEW	2015-06-04	14:39:53	27	3	NOSTIM	90	3	0
ISONEW	2015-06-04	14:39:53	36	4	NOSTIM	90	4	7
ISONEW	2015-06-04	14:39:53	53	5	NOSTIM	90	5	3
ISONEW	2015-06-04	14:39:53	46	1	NOSTIM	90	6	0
ISONEW	2015-06-04	14:39:53	15	2	NOSTIM	90	7	0
ISONEW	2015-06-04	14:39:53	56	3	NOSTIM	90	8	1
ISONEW	2015-06-04	14:39:53	49	1	P120	91	1	557
ISONEW	2015-06-04	14:39:53	18	2	P120	91	2	224
ISONEW	2015-06-04	14:39:53	27	3	P120	91	3	472
ISONEW	2015-06-04	14:39:53	36	4	P120	91	4	311
ISONEW	2015-06-04	14:39:53	53	5	P120	91	5	141
ISONEW	2015-06-04	14:39:53	46	1	P120	91	6	35
ISONEW	2015-06-04	14:39:53	15	2	P120	91	7	137
ISONEW	2015-06-04	14:39:53	56	3	P120	91	8	243
ISONEW	2015-06-04	14:39:53	49	1	NOSTIM	92	1	0
ISONEW	2015-06-04	14:39:53	18	2	NOSTIM	92	2	0
ISONEW	2015-06-04	14:39:53	27	3	NOSTIM	92	3	0
ISONEW	2015-06-04	14:39:53	36	4	NOSTIM	92	4	4
ISONEW	2015-06-04	14:39:53	53	5	NOSTIM	92	5	19
ISONEW	2015-06-04	14:39:53	46	1	NOSTIM	92	6	0
ISONEW	2015-06-04	14:39:53	15	2	NOSTIM	92	7	2
ISONEW	2015-06-04	14:39:53	56	3	NOSTIM	92	8	0
ISONEW	2015-06-04	14:39:53	49	1	PP3P120	93	1	8
ISONEW	2015-06-04	14:39:53	18	2	PP3P120	93	2	56
ISONEW	2015-06-04	14:39:53	27	3	PP3P120	93	3	333
ISONEW	2015-06-04	14:39:53	36	4	PP3P120	93	4	449
ISONEW	2015-06-04	14:39:53	53	5	PP3P120	93	5	265
ISONEW	2015-06-04	14:39:53	46	1	PP3P120	93	6	45
ISONEW	2015-06-04	14:39:53	15	2	PP3P120	93	7	105
ISONEW	2015-06-04	14:39:53	56	3	PP3P120	93	8	142
ISONEW	2015-06-04	14:39:53	49	1	NOSTIM	94	1	0
ISONEW	2015-06-04	14:39:53	18	2	NOSTIM	94	2	0
ISONEW	2015-06-04	14:39:53	27	3	NOSTIM	94	3	0
ISONEW	2015-06-04	14:39:53	36	4	NOSTIM	94	4	6
ISONEW	2015-06-04	14:39:53	53	5	NOSTIM	94	5	1
ISONEW	2015-06-04	14:39:53	46	1	NOSTIM	94	6	0
ISONEW	2015-06-04	14:39:53	15	2	NOSTIM	94	7	14
ISONEW	2015-06-04	14:39:53	56	3	NOSTIM	94	8	0
ISONEW	2015-06-04	14:39:53	49	1	PP12P120	95	1	26
ISONEW	2015-06-04	14:39:53	18	2	PP12P120	95	2	6
ISONEW	2015-06-04	14:39:53	27	3	PP12P120	95	3	94
ISONEW	2015-06-04	14:39:53	36	4	PP12P120	95	4	188
ISONEW	2015-06-04	14:39:53	53	5	PP12P120	95	5	37
ISONEW	2015-06-04	14:39:53	46	1	PP12P120	95	6	22
ISONEW	2015-06-04	14:39:53	15	2	PP12P120	95	7	20
ISONEW	2015-06-04	14:39:53	56	3	PP12P120	95	8	62
ISONEW	2015-06-04	14:39:53	49	1	NOSTIM	96	1	0
ISONEW	2015-06-04	14:39:53	18	2	NOSTIM	96	2	0
ISONEW	2015-06-04	14:39:53	27	3	NOSTIM	96	3	0
ISONEW	2015-06-04	14:39:53	36	4	NOSTIM	96	4	11
ISONEW	2015-06-04	14:39:53	53	5	NOSTIM	96	5	0
ISONEW	2015-06-04	14:39:53	46	1	NOSTIM	96	6	0
ISONEW	2015-06-04	14:39:53	15	2	NOSTIM	96	7	0
ISONEW	2015-06-04	14:39:53	56	3	NOSTIM	96	8	0
ISONEW	2015-06-04	14:39:53	49	1	PP6P120	97	1	2
ISONEW	2015-06-04	14:39:53	18	2	PP6P120	97	2	32
ISONEW	2015-06-04	14:39:53	27	3	PP6P120	97	3	144
ISONEW	2015-06-04	14:39:53	36	4	PP6P120	97	4	208
ISONEW	2015-06-04	14:39:53	53	5	PP6P120	97	5	172
ISONEW	2015-06-04	14:39:53	46	1	PP6P120	97	6	14
ISONEW	2015-06-04	14:39:53	15	2	PP6P120	97	7	36
ISONEW	2015-06-04	14:39:53	56	3	PP6P120	97	8	81
ISONEW	2015-06-04	14:39:53	49	1	NOSTIM	98	1	0
ISONEW	2015-06-04	14:39:53	18	2	NOSTIM	98	2	0
ISONEW	2015-06-04	14:39:53	27	3	NOSTIM	98	3	0
ISONEW	2015-06-04	14:39:53	36	4	NOSTIM	98	4	3
ISONEW	2015-06-04	14:39:53	53	5	NOSTIM	98	5	1
ISONEW	2015-06-04	14:39:53	46	1	NOSTIM	98	6	0
ISONEW	2015-06-04	14:39:53	15	2	NOSTIM	98	7	0
ISONEW	2015-06-04	14:39:53	56	3	NOSTIM	98	8	0
ISONEW	2015-06-04	14:39:53	49	1	P120	99	1	136
ISONEW	2015-06-04	14:39:53	18	2	P120	99	2	126
ISONEW	2015-06-04	14:39:53	27	3	P120	99	3	804
ISONEW	2015-06-04	14:39:53	36	4	P120	99	4	441
ISONEW	2015-06-04	14:39:53	53	5	P120	99	5	93
ISONEW	2015-06-04	14:39:53	46	1	P120	99	6	214
ISONEW	2015-06-04	14:39:53	15	2	P120	99	7	149
ISONEW	2015-06-04	14:39:53	56	3	P120	99	8	238
ISONEW	2015-06-04	14:39:53	49	1	NOSTIM	100	1	0
ISONEW	2015-06-04	14:39:53	18	2	NOSTIM	100	2	0
ISONEW	2015-06-04	14:39:53	27	3	NOSTIM	100	3	0
ISONEW	2015-06-04	14:39:53	36	4	NOSTIM	100	4	8
ISONEW	2015-06-04	14:39:53	53	5	NOSTIM	100	5	4
ISONEW	2015-06-04	14:39:53	46	1	NOSTIM	100	6	0
ISONEW	2015-06-04	14:39:53	15	2	NOSTIM	100	7	0
ISONEW	2015-06-04	14:39:53	56	3	NOSTIM	100	8	0
ISONEW	2015-06-04	14:39:53	49	1	PP3P120	101	1	32
ISONEW	2015-06-04	14:39:53	18	2	PP3P120	101	2	7
ISONEW	2015-06-04	14:39:53	27	3	PP3P120	101	3	185
ISONEW	2015-06-04	14:39:53	36	4	PP3P120	101	4	391
ISONEW	2015-06-04	14:39:53	53	5	PP3P120	101	5	32
ISONEW	2015-06-04	14:39:53	46	1	PP3P120	101	6	81
ISONEW	2015-06-04	14:39:53	15	2	PP3P120	101	7	38
ISONEW	2015-06-04	14:39:53	56	3	PP3P120	101	8	248
ISONEW	2015-06-04	14:39:53	49	1	NOSTIM	102	1	0
ISONEW	2015-06-04	14:39:53	18	2	NOSTIM	102	2	0
ISONEW	2015-06-04	14:39:53	27	3	NOSTIM	102	3	0
ISONEW	2015-06-04	14:39:53	36	4	NOSTIM	102	4	14
ISONEW	2015-06-04	14:39:53	53	5	NOSTIM	102	5	3
ISONEW	2015-06-04	14:39:53	46	1	NOSTIM	102	6	0
ISONEW	2015-06-04	14:39:53	15	2	NOSTIM	102	7	3
ISONEW	2015-06-04	14:39:53	56	3	NOSTIM	102	8	0
ISONEW	2015-06-04	14:39:53	49	1	PP12P120	103	1	11
ISONEW	2015-06-04	14:39:53	18	2	PP12P120	103	2	8
ISONEW	2015-06-04	14:39:53	27	3	PP12P120	103	3	27
ISONEW	2015-06-04	14:39:53	36	4	PP12P120	103	4	162
ISONEW	2015-06-04	14:39:53	53	5	PP12P120	103	5	288
ISONEW	2015-06-04	14:39:53	46	1	PP12P120	103	6	12
ISONEW	2015-06-04	14:39:53	15	2	PP12P120	103	7	13
ISONEW	2015-06-04	14:39:53	56	3	PP12P120	103	8	32
ISONEW	2015-06-04	14:39:53	49	1	NOSTIM	104	1	0
ISONEW	2015-06-04	14:39:53	18	2	NOSTIM	104	2	0
ISONEW	2015-06-04	14:39:53	27	3	NOSTIM	104	3	0
ISONEW	2015-06-04	14:39:53	36	4	NOSTIM	104	4	4
ISONEW	2015-06-04	14:39:53	53	5	NOSTIM	104	5	4
ISONEW	2015-06-04	14:39:53	46	1	NOSTIM	104	6	0
ISONEW	2015-06-04	14:39:53	15	2	NOSTIM	104	7	0
ISONEW	2015-06-04	14:39:53	56	3	NOSTIM	104	8	0
ISONEW	2015-06-04	14:39:53	49	1	P120	105	1	198
ISONEW	2015-06-04	14:39:53	18	2	P120	105	2	44
ISONEW	2015-06-04	14:39:53	27	3	P120	105	3	327
ISONEW	2015-06-04	14:39:53	36	4	P120	105	4	336
ISONEW	2015-06-04	14:39:53	53	5	P120	105	5	215
ISONEW	2015-06-04	14:39:53	46	1	P120	105	6	175
ISONEW	2015-06-04	14:39:53	15	2	P120	105	7	43
ISONEW	2015-06-04	14:39:53	56	3	P120	105	8	510
ISONEW	2015-06-04	14:39:53	49	1	NOSTIM	106	1	0
ISONEW	2015-06-04	14:39:53	18	2	NOSTIM	106	2	0
ISONEW	2015-06-04	14:39:53	27	3	NOSTIM	106	3	0
ISONEW	2015-06-04	14:39:53	36	4	NOSTIM	106	4	20
ISONEW	2015-06-04	14:39:53	53	5	NOSTIM	106	5	25
ISONEW	2015-06-04	14:39:53	46	1	NOSTIM	106	6	0
ISONEW	2015-06-04	14:39:53	15	2	NOSTIM	106	7	0
ISONEW	2015-06-04	14:39:53	56	3	NOSTIM	106	8	0
ISONEW	2015-06-04	14:39:53	49	1	PP6P120	107	1	55
ISONEW	2015-06-04	14:39:53	18	2	PP6P120	107	2	12
ISONEW	2015-06-04	14:39:53	27	3	PP6P120	107	3	90
ISONEW	2015-06-04	14:39:53	36	4	PP6P120	107	4	332
ISONEW	2015-06-04	14:39:53	53	5	PP6P120	107	5	42
ISONEW	2015-06-04	14:39:53	46	1	PP6P120	107	6	47
ISONEW	2015-06-04	14:39:53	15	2	PP6P120	107	7	13
ISONEW	2015-06-04	14:39:53	56	3	PP6P120	107	8	135
ISONEW	2015-06-04	14:39:53	49	1	NOSTIM	108	1	0
ISONEW	2015-06-04	14:39:53	18	2	NOSTIM	108	2	0
ISONEW	2015-06-04	14:39:53	27	3	NOSTIM	108	3	0
ISONEW	2015-06-04	14:39:53	36	4	NOSTIM	108	4	11
ISONEW	2015-06-04	14:39:53	53	5	NOSTIM	108	5	20
ISONEW	2015-06-04	14:39:53	46	1	NOSTIM	108	6	0
ISONEW	2015-06-04	14:39:53	15	2	NOSTIM	108	7	0
ISONEW	2015-06-04	14:39:53	56	3	NOSTIM	108	8	0
ISONEW	2015-06-04	14:39:53	49	1	P120	109	1	262
ISONEW	2015-06-04	14:39:53	18	2	P120	109	2	270
ISONEW	2015-06-04	14:39:53	27	3	P120	109	3	370
ISONEW	2015-06-04	14:39:53	36	4	P120	109	4	203
ISONEW	2015-06-04	14:39:53	53	5	P120	109	5	79
ISONEW	2015-06-04	14:39:53	46	1	P120	109	6	517
ISONEW	2015-06-04	14:39:53	15	2	P120	109	7	180
ISONEW	2015-06-04	14:39:53	56	3	P120	109	8	111
ISONEW	2015-06-04	14:39:53	49	1	NOSTIM	110	1	0
ISONEW	2015-06-04	14:39:53	18	2	NOSTIM	110	2	0
ISONEW	2015-06-04	14:39:53	27	3	NOSTIM	110	3	0
ISONEW	2015-06-04	14:39:53	36	4	NOSTIM	110	4	6
ISONEW	2015-06-04	14:39:53	53	5	NOSTIM	110	5	7
ISONEW	2015-06-04	14:39:53	46	1	NOSTIM	110	6	0
ISONEW	2015-06-04	14:39:53	15	2	NOSTIM	110	7	0
ISONEW	2015-06-04	14:39:53	56	3	NOSTIM	110	8	0
ISONEW	2015-06-04	14:39:53	49	1	P120	111	1	38
ISONEW	2015-06-04	14:39:53	18	2	P120	111	2	98
ISONEW	2015-06-04	14:39:53	27	3	P120	111	3	398
ISONEW	2015-06-04	14:39:53	36	4	P120	111	4	381
ISONEW	2015-06-04	14:39:53	53	5	P120	111	5	76
ISONEW	2015-06-04	14:39:53	46	1	P120	111	6	108
ISONEW	2015-06-04	14:39:53	15	2	P120	111	7	11
ISONEW	2015-06-04	14:39:53	56	3	P120	111	8	278
ISONEW	2015-06-04	14:39:53	49	1	NOSTIM	112	1	0
ISONEW	2015-06-04	14:39:53	18	2	NOSTIM	112	2	0
ISONEW	2015-06-04	14:39:53	27	3	NOSTIM	112	3	0
ISONEW	2015-06-04	14:39:53	36	4	NOSTIM	112	4	6
ISONEW	2015-06-04	14:39:53	53	5	NOSTIM	112	5	0
ISONEW	2015-06-04	14:39:53	46	1	NOSTIM	112	6	1
ISONEW	2015-06-04	14:39:53	15	2	NOSTIM	112	7	1
ISONEW	2015-06-04	14:39:53	56	3	NOSTIM	112	8	0
ISONEW	2015-06-04	14:39:53	49	1	P120	113	1	0
ISONEW	2015-06-04	14:39:53	18	2	P120	113	2	41
ISONEW	2015-06-04	14:39:53	27	3	P120	113	3	270
ISONEW	2015-06-04	14:39:53	36	4	P120	113	4	205
ISONEW	2015-06-04	14:39:53	53	5	P120	113	5	50
ISONEW	2015-06-04	14:39:53	46	1	P120	113	6	155
ISONEW	2015-06-04	14:39:53	15	2	P120	113	7	10
ISONEW	2015-06-04	14:39:53	56	3	P120	113	8	188
ISONEW	2015-06-04	14:39:53	49	1	NOSTIM	114	1	0
ISONEW	2015-06-04	14:39:53	18	2	NOSTIM	114	2	0
ISONEW	2015-06-04	14:39:53	27	3	NOSTIM	114	3	0
ISONEW	2015-06-04	14:39:53	36	4	NOSTIM	114	4	4
ISONEW	2015-06-04	14:39:53	53	5	NOSTIM	114	5	5
ISONEW	2015-06-04	14:39:53	46	1	NOSTIM	114	6	0
ISONEW	2015-06-04	14:39:53	15	2	NOSTIM	114	7	0
ISONEW	2015-06-04	14:39:53	56	3	NOSTIM	114	8	0
ISONEW	2015-06-04	14:39:53	49	1	P120	115	1	133
ISONEW	2015-06-04	14:39:53	18	2	P120	115	2	227
ISONEW	2015-06-04	14:39:53	27	3	P120	115	3	408
ISONEW	2015-06-04	14:39:53	36	4	P120	115	4	438
ISONEW	2015-06-04	14:39:53	53	5	P120	115	5	119
ISONEW	2015-06-04	14:39:53	46	1	P120	115	6	120
ISONEW	2015-06-04	14:39:53	15	2	P120	115	7	77
ISONEW	2015-06-04	14:39:53	56	3	P120	115	8	132
ISONEW	2015-06-04	14:39:53	49	1	NOSTIM	116	1	0
ISONEW	2015-06-04	14:39:53	18	2	NOSTIM	116	2	0
ISONEW	2015-06-04	14:39:53	27	3	NOSTIM	116	3	0
ISONEW	2015-06-04	14:39:53	36	4	NOSTIM	116	4	1
ISONEW	2015-06-04	14:39:53	53	5	NOSTIM	116	5	0
ISONEW	2015-06-04	14:39:53	46	1	NOSTIM	116	6	0
ISONEW	2015-06-04	14:39:53	15	2	NOSTIM	116	7	0
ISONEW	2015-06-04	14:39:53	56	3	NOSTIM	116	8	0
ISONEW	2015-06-04	14:39:53	49	1	P120	117	1	149
ISONEW	2015-06-04	14:39:53	18	2	P120	117	2	50
ISONEW	2015-06-04	14:39:53	27	3	P120	117	3	373
ISONEW	2015-06-04	14:39:53	36	4	P120	117	4	533
ISONEW	2015-06-04	14:39:53	53	5	P120	117	5	194
ISONEW	2015-06-04	14:39:53	46	1	P120	117	6	97
ISONEW	2015-06-04	14:39:53	15	2	P120	117	7	424
ISONEW	2015-06-04	14:39:53	56	3	P120	117	8	377
ISONEW	2015-06-04	14:39:53	49	1	NOSTIM	118	1	5
ISONEW	2015-06-04	14:39:53	18	2	NOSTIM	118	2	0
ISONEW	2015-06-04	14:39:53	27	3	NOSTIM	118	3	0
ISONEW	2015-06-04	14:39:53	36	4	NOSTIM	118	4	33
ISONEW	2015-06-04	14:39:53	53	5	NOSTIM	118	5	45
ISONEW	2015-06-04	14:39:53	46	1	NOSTIM	118	6	0
ISONEW	2015-06-04	14:39:53	15	2	NOSTIM	118	7	0
ISONEW	2015-06-04	14:39:53	56	3	NOSTIM	118	8	0
ISONEW	2015-06-04	14:39:53	49	1	P120	119	1	232
ISONEW	2015-06-04	14:39:53	18	2	P120	119	2	85
ISONEW	2015-06-04	14:39:53	27	3	P120	119	3	208
ISONEW	2015-06-04	14:39:53	36	4	P120	119	4	279
ISONEW	2015-06-04	14:39:53	53	5	P120	119	5	84
ISONEW	2015-06-04	14:39:53	46	1	P120	119	6	34
ISONEW	2015-06-04	14:39:53	15	2	P120	119	7	120
ISONEW	2015-06-04	14:39:53	56	3	P120	119	8	193
ISONEW	2015-06-04	14:39:53	49	1	NOSTIM	120	1	0
ISONEW	2015-06-04	14:39:53	18	2	NOSTIM	120	2	0
ISONEW	2015-06-04	14:39:53	27	3	NOSTIM	120	3	0
ISONEW	2015-06-04	14:39:53	36	4	NOSTIM	120	4	16
ISONEW	2015-06-04	14:39:53	53	5	NOSTIM	120	5	17
ISONEW	2015-06-04	14:39:53	46	1	NOSTIM	120	6	2
ISONEW	2015-06-04	14:39:53	15	2	NOSTIM	120	7	0
ISONEW	2015-06-04	14:39:53	56	3	NOSTIM	120	8	0
ISONEW	2015-06-04	15:18:10	57	2	P120	1	1	2265
ISONEW	2015-06-04	15:18:10	34	3	P120	1	2	896
ISONEW	2015-06-04	15:18:10	35	4	P120	1	3	1434
ISONEW	2015-06-04	15:18:10	28	5	P120	1	4	1382
ISONEW	2015-06-04	15:18:10	29	1	P120	1	5	1288
ISONEW	2015-06-04	15:18:10	54	2	P120	1	6	535
ISONEW	2015-06-04	15:18:10	23	3	P120	1	7	2189
ISONEW	2015-06-04	15:18:10	40	4	P120	1	8	842
ISONEW	2015-06-04	15:18:10	57	2	NOSTIM	2	1	0
ISONEW	2015-06-04	15:18:10	34	3	NOSTIM	2	2	0
ISONEW	2015-06-04	15:18:10	35	4	NOSTIM	2	3	0
ISONEW	2015-06-04	15:18:10	28	5	NOSTIM	2	4	4
ISONEW	2015-06-04	15:18:10	29	1	NOSTIM	2	5	0
ISONEW	2015-06-04	15:18:10	54	2	NOSTIM	2	6	0
ISONEW	2015-06-04	15:18:10	23	3	NOSTIM	2	7	0
ISONEW	2015-06-04	15:18:10	40	4	NOSTIM	2	8	0
ISONEW	2015-06-04	15:18:10	57	2	P120	3	1	1780
ISONEW	2015-06-04	15:18:10	34	3	P120	3	2	1084
ISONEW	2015-06-04	15:18:10	35	4	P120	3	3	1719
ISONEW	2015-06-04	15:18:10	28	5	P120	3	4	754
ISONEW	2015-06-04	15:18:10	29	1	P120	3	5	2256
ISONEW	2015-06-04	15:18:10	54	2	P120	3	6	1685
ISONEW	2015-06-04	15:18:10	23	3	P120	3	7	2102
ISONEW	2015-06-04	15:18:10	40	4	P120	3	8	916
ISONEW	2015-06-04	15:18:10	57	2	NOSTIM	4	1	0
ISONEW	2015-06-04	15:18:10	34	3	NOSTIM	4	2	0
ISONEW	2015-06-04	15:18:10	35	4	NOSTIM	4	3	0
ISONEW	2015-06-04	15:18:10	28	5	NOSTIM	4	4	12
ISONEW	2015-06-04	15:18:10	29	1	NOSTIM	4	5	0
ISONEW	2015-06-04	15:18:10	54	2	NOSTIM	4	6	0
ISONEW	2015-06-04	15:18:10	23	3	NOSTIM	4	7	0
ISONEW	2015-06-04	15:18:10	40	4	NOSTIM	4	8	0
ISONEW	2015-06-04	15:18:10	57	2	P120	5	1	1110
ISONEW	2015-06-04	15:18:10	34	3	P120	5	2	222
ISONEW	2015-06-04	15:18:10	35	4	P120	5	3	1575
ISONEW	2015-06-04	15:18:10	28	5	P120	5	4	1153
ISONEW	2015-06-04	15:18:10	29	1	P120	5	5	2644
ISONEW	2015-06-04	15:18:10	54	2	P120	5	6	1349
ISONEW	2015-06-04	15:18:10	23	3	P120	5	7	1351
ISONEW	2015-06-04	15:18:10	40	4	P120	5	8	1621
ISONEW	2015-06-04	15:18:10	57	2	NOSTIM	6	1	0
ISONEW	2015-06-04	15:18:10	34	3	NOSTIM	6	2	0
ISONEW	2015-06-04	15:18:10	35	4	NOSTIM	6	3	0
ISONEW	2015-06-04	15:18:10	28	5	NOSTIM	6	4	4
ISONEW	2015-06-04	15:18:10	29	1	NOSTIM	6	5	0
ISONEW	2015-06-04	15:18:10	54	2	NOSTIM	6	6	0
ISONEW	2015-06-04	15:18:10	23	3	NOSTIM	6	7	0
ISONEW	2015-06-04	15:18:10	40	4	NOSTIM	6	8	0
ISONEW	2015-06-04	15:18:10	57	2	P120	7	1	1040
ISONEW	2015-06-04	15:18:10	34	3	P120	7	2	1027
ISONEW	2015-06-04	15:18:10	35	4	P120	7	3	2033
ISONEW	2015-06-04	15:18:10	28	5	P120	7	4	675
ISONEW	2015-06-04	15:18:10	29	1	P120	7	5	2158
ISONEW	2015-06-04	15:18:10	54	2	P120	7	6	1211
ISONEW	2015-06-04	15:18:10	23	3	P120	7	7	1410
ISONEW	2015-06-04	15:18:10	40	4	P120	7	8	1552
ISONEW	2015-06-04	15:18:10	57	2	NOSTIM	8	1	0
ISONEW	2015-06-04	15:18:10	34	3	NOSTIM	8	2	0
ISONEW	2015-06-04	15:18:10	35	4	NOSTIM	8	3	0
ISONEW	2015-06-04	15:18:10	28	5	NOSTIM	8	4	3
ISONEW	2015-06-04	15:18:10	29	1	NOSTIM	8	5	0
ISONEW	2015-06-04	15:18:10	54	2	NOSTIM	8	6	0
ISONEW	2015-06-04	15:18:10	23	3	NOSTIM	8	7	0
ISONEW	2015-06-04	15:18:10	40	4	NOSTIM	8	8	0
ISONEW	2015-06-04	15:18:10	57	2	P120	9	1	1369
ISONEW	2015-06-04	15:18:10	34	3	P120	9	2	248
ISONEW	2015-06-04	15:18:10	35	4	P120	9	3	1881
ISONEW	2015-06-04	15:18:10	28	5	P120	9	4	510
ISONEW	2015-06-04	15:18:10	29	1	P120	9	5	1008
ISONEW	2015-06-04	15:18:10	54	2	P120	9	6	1346
ISONEW	2015-06-04	15:18:10	23	3	P120	9	7	301
ISONEW	2015-06-04	15:18:10	40	4	P120	9	8	577
ISONEW	2015-06-04	15:18:10	57	2	NOSTIM	10	1	0
ISONEW	2015-06-04	15:18:10	34	3	NOSTIM	10	2	0
ISONEW	2015-06-04	15:18:10	35	4	NOSTIM	10	3	0
ISONEW	2015-06-04	15:18:10	28	5	NOSTIM	10	4	2
ISONEW	2015-06-04	15:18:10	29	1	NOSTIM	10	5	16
ISONEW	2015-06-04	15:18:10	54	2	NOSTIM	10	6	0
ISONEW	2015-06-04	15:18:10	23	3	NOSTIM	10	7	0
ISONEW	2015-06-04	15:18:10	40	4	NOSTIM	10	8	0
ISONEW	2015-06-04	15:18:10	57	2	P120	11	1	957
ISONEW	2015-06-04	15:18:10	34	3	P120	11	2	64
ISONEW	2015-06-04	15:18:10	35	4	P120	11	3	2026
ISONEW	2015-06-04	15:18:10	28	5	P120	11	4	463
ISONEW	2015-06-04	15:18:10	29	1	P120	11	5	1035
ISONEW	2015-06-04	15:18:10	54	2	P120	11	6	207
ISONEW	2015-06-04	15:18:10	23	3	P120	11	7	662
ISONEW	2015-06-04	15:18:10	40	4	P120	11	8	466
ISONEW	2015-06-04	15:18:10	57	2	NOSTIM	12	1	0
ISONEW	2015-06-04	15:18:10	34	3	NOSTIM	12	2	0
ISONEW	2015-06-04	15:18:10	35	4	NOSTIM	12	3	0
ISONEW	2015-06-04	15:18:10	28	5	NOSTIM	12	4	2
ISONEW	2015-06-04	15:18:10	29	1	NOSTIM	12	5	0
ISONEW	2015-06-04	15:18:10	54	2	NOSTIM	12	6	0
ISONEW	2015-06-04	15:18:10	23	3	NOSTIM	12	7	0
ISONEW	2015-06-04	15:18:10	40	4	NOSTIM	12	8	0
ISONEW	2015-06-04	15:18:10	57	2	PP6P120	13	1	103
ISONEW	2015-06-04	15:18:10	34	3	PP6P120	13	2	60
ISONEW	2015-06-04	15:18:10	35	4	PP6P120	13	3	626
ISONEW	2015-06-04	15:18:10	28	5	PP6P120	13	4	871
ISONEW	2015-06-04	15:18:10	29	1	PP6P120	13	5	123
ISONEW	2015-06-04	15:18:10	54	2	PP6P120	13	6	134
ISONEW	2015-06-04	15:18:10	23	3	PP6P120	13	7	158
ISONEW	2015-06-04	15:18:10	40	4	PP6P120	13	8	722
ISONEW	2015-06-04	15:18:10	57	2	NOSTIM	14	1	0
ISONEW	2015-06-04	15:18:10	34	3	NOSTIM	14	2	0
ISONEW	2015-06-04	15:18:10	35	4	NOSTIM	14	3	0
ISONEW	2015-06-04	15:18:10	28	5	NOSTIM	14	4	2
ISONEW	2015-06-04	15:18:10	29	1	NOSTIM	14	5	0
ISONEW	2015-06-04	15:18:10	54	2	NOSTIM	14	6	0
ISONEW	2015-06-04	15:18:10	23	3	NOSTIM	14	7	0
ISONEW	2015-06-04	15:18:10	40	4	NOSTIM	14	8	3
ISONEW	2015-06-04	15:18:10	57	2	PP12P120	15	1	127
ISONEW	2015-06-04	15:18:10	34	3	PP12P120	15	2	34
ISONEW	2015-06-04	15:18:10	35	4	PP12P120	15	3	165
ISONEW	2015-06-04	15:18:10	28	5	PP12P120	15	4	442
ISONEW	2015-06-04	15:18:10	29	1	PP12P120	15	5	37
ISONEW	2015-06-04	15:18:10	54	2	PP12P120	15	6	17
ISONEW	2015-06-04	15:18:10	23	3	PP12P120	15	7	20
ISONEW	2015-06-04	15:18:10	40	4	PP12P120	15	8	442
ISONEW	2015-06-04	15:18:10	57	2	NOSTIM	16	1	0
ISONEW	2015-06-04	15:18:10	34	3	NOSTIM	16	2	0
ISONEW	2015-06-04	15:18:10	35	4	NOSTIM	16	3	0
ISONEW	2015-06-04	15:18:10	28	5	NOSTIM	16	4	2
ISONEW	2015-06-04	15:18:10	29	1	NOSTIM	16	5	0
ISONEW	2015-06-04	15:18:10	54	2	NOSTIM	16	6	0
ISONEW	2015-06-04	15:18:10	23	3	NOSTIM	16	7	0
ISONEW	2015-06-04	15:18:10	40	4	NOSTIM	16	8	0
ISONEW	2015-06-04	15:18:10	57	2	PP3P120	17	1	125
ISONEW	2015-06-04	15:18:10	34	3	PP3P120	17	2	162
ISONEW	2015-06-04	15:18:10	35	4	PP3P120	17	3	247
ISONEW	2015-06-04	15:18:10	28	5	PP3P120	17	4	447
ISONEW	2015-06-04	15:18:10	29	1	PP3P120	17	5	344
ISONEW	2015-06-04	15:18:10	54	2	PP3P120	17	6	227
ISONEW	2015-06-04	15:18:10	23	3	PP3P120	17	7	149
ISONEW	2015-06-04	15:18:10	40	4	PP3P120	17	8	1158
ISONEW	2015-06-04	15:18:10	57	2	NOSTIM	18	1	0
ISONEW	2015-06-04	15:18:10	34	3	NOSTIM	18	2	0
ISONEW	2015-06-04	15:18:10	35	4	NOSTIM	18	3	0
ISONEW	2015-06-04	15:18:10	28	5	NOSTIM	18	4	6
ISONEW	2015-06-04	15:18:10	29	1	NOSTIM	18	5	0
ISONEW	2015-06-04	15:18:10	54	2	NOSTIM	18	6	0
ISONEW	2015-06-04	15:18:10	23	3	NOSTIM	18	7	0
ISONEW	2015-06-04	15:18:10	40	4	NOSTIM	18	8	0
ISONEW	2015-06-04	15:18:10	57	2	P120	19	1	158
ISONEW	2015-06-04	15:18:10	34	3	P120	19	2	65
ISONEW	2015-06-04	15:18:10	35	4	P120	19	3	160
ISONEW	2015-06-04	15:18:10	28	5	P120	19	4	411
ISONEW	2015-06-04	15:18:10	29	1	P120	19	5	1082
ISONEW	2015-06-04	15:18:10	54	2	P120	19	6	299
ISONEW	2015-06-04	15:18:10	23	3	P120	19	7	1136
ISONEW	2015-06-04	15:18:10	40	4	P120	19	8	1687
ISONEW	2015-06-04	15:18:10	57	2	NOSTIM	20	1	0
ISONEW	2015-06-04	15:18:10	34	3	NOSTIM	20	2	0
ISONEW	2015-06-04	15:18:10	35	4	NOSTIM	20	3	0
ISONEW	2015-06-04	15:18:10	28	5	NOSTIM	20	4	10
ISONEW	2015-06-04	15:18:10	29	1	NOSTIM	20	5	0
ISONEW	2015-06-04	15:18:10	54	2	NOSTIM	20	6	0
ISONEW	2015-06-04	15:18:10	23	3	NOSTIM	20	7	0
ISONEW	2015-06-04	15:18:10	40	4	NOSTIM	20	8	0
ISONEW	2015-06-04	15:18:10	57	2	PP6P120	21	1	165
ISONEW	2015-06-04	15:18:10	34	3	PP6P120	21	2	24
ISONEW	2015-06-04	15:18:10	35	4	PP6P120	21	3	219
ISONEW	2015-06-04	15:18:10	28	5	PP6P120	21	4	538
ISONEW	2015-06-04	15:18:10	29	1	PP6P120	21	5	204
ISONEW	2015-06-04	15:18:10	54	2	PP6P120	21	6	47
ISONEW	2015-06-04	15:18:10	23	3	PP6P120	21	7	28
ISONEW	2015-06-04	15:18:10	40	4	PP6P120	21	8	572
ISONEW	2015-06-04	15:18:10	57	2	NOSTIM	22	1	0
ISONEW	2015-06-04	15:18:10	34	3	NOSTIM	22	2	0
ISONEW	2015-06-04	15:18:10	35	4	NOSTIM	22	3	0
ISONEW	2015-06-04	15:18:10	28	5	NOSTIM	22	4	2
ISONEW	2015-06-04	15:18:10	29	1	NOSTIM	22	5	4
ISONEW	2015-06-04	15:18:10	54	2	NOSTIM	22	6	0
ISONEW	2015-06-04	15:18:10	23	3	NOSTIM	22	7	0
ISONEW	2015-06-04	15:18:10	40	4	NOSTIM	22	8	0
ISONEW	2015-06-04	15:18:10	57	2	PP3P120	23	1	77
ISONEW	2015-06-04	15:18:10	34	3	PP3P120	23	2	31
ISONEW	2015-06-04	15:18:10	35	4	PP3P120	23	3	125
ISONEW	2015-06-04	15:18:10	28	5	PP3P120	23	4	723
ISONEW	2015-06-04	15:18:10	29	1	PP3P120	23	5	169
ISONEW	2015-06-04	15:18:10	54	2	PP3P120	23	6	247
ISONEW	2015-06-04	15:18:10	23	3	PP3P120	23	7	131
ISONEW	2015-06-04	15:18:10	40	4	PP3P120	23	8	566
ISONEW	2015-06-04	15:18:10	57	2	NOSTIM	24	1	0
ISONEW	2015-06-04	15:18:10	34	3	NOSTIM	24	2	0
ISONEW	2015-06-04	15:18:10	35	4	NOSTIM	24	3	1
ISONEW	2015-06-04	15:18:10	28	5	NOSTIM	24	4	2
ISONEW	2015-06-04	15:18:10	29	1	NOSTIM	24	5	2
ISONEW	2015-06-04	15:18:10	54	2	NOSTIM	24	6	0
ISONEW	2015-06-04	15:18:10	23	3	NOSTIM	24	7	0
ISONEW	2015-06-04	15:18:10	40	4	NOSTIM	24	8	0
ISONEW	2015-06-04	15:18:10	57	2	PP6P120	25	1	36
ISONEW	2015-06-04	15:18:10	34	3	PP6P120	25	2	8
ISONEW	2015-06-04	15:18:10	35	4	PP6P120	25	3	146
ISONEW	2015-06-04	15:18:10	28	5	PP6P120	25	4	496
ISONEW	2015-06-04	15:18:10	29	1	PP6P120	25	5	95
ISONEW	2015-06-04	15:18:10	54	2	PP6P120	25	6	18
ISONEW	2015-06-04	15:18:10	23	3	PP6P120	25	7	39
ISONEW	2015-06-04	15:18:10	40	4	PP6P120	25	8	651
ISONEW	2015-06-04	15:18:10	57	2	NOSTIM	26	1	0
ISONEW	2015-06-04	15:18:10	34	3	NOSTIM	26	2	0
ISONEW	2015-06-04	15:18:10	35	4	NOSTIM	26	3	0
ISONEW	2015-06-04	15:18:10	28	5	NOSTIM	26	4	7
ISONEW	2015-06-04	15:18:10	29	1	NOSTIM	26	5	0
ISONEW	2015-06-04	15:18:10	54	2	NOSTIM	26	6	0
ISONEW	2015-06-04	15:18:10	23	3	NOSTIM	26	7	0
ISONEW	2015-06-04	15:18:10	40	4	NOSTIM	26	8	1
ISONEW	2015-06-04	15:18:10	57	2	P120	27	1	120
ISONEW	2015-06-04	15:18:10	34	3	P120	27	2	28
ISONEW	2015-06-04	15:18:10	35	4	P120	27	3	218
ISONEW	2015-06-04	15:18:10	28	5	P120	27	4	1076
ISONEW	2015-06-04	15:18:10	29	1	P120	27	5	122
ISONEW	2015-06-04	15:18:10	54	2	P120	27	6	214
ISONEW	2015-06-04	15:18:10	23	3	P120	27	7	609
ISONEW	2015-06-04	15:18:10	40	4	P120	27	8	928
ISONEW	2015-06-04	15:18:10	57	2	NOSTIM	28	1	0
ISONEW	2015-06-04	15:18:10	34	3	NOSTIM	28	2	0
ISONEW	2015-06-04	15:18:10	35	4	NOSTIM	28	3	0
ISONEW	2015-06-04	15:18:10	28	5	NOSTIM	28	4	1
ISONEW	2015-06-04	15:18:10	29	1	NOSTIM	28	5	0
ISONEW	2015-06-04	15:18:10	54	2	NOSTIM	28	6	0
ISONEW	2015-06-04	15:18:10	23	3	NOSTIM	28	7	0
ISONEW	2015-06-04	15:18:10	40	4	NOSTIM	28	8	0
ISONEW	2015-06-04	15:18:10	57	2	PP12P120	29	1	62
ISONEW	2015-06-04	15:18:10	34	3	PP12P120	29	2	17
ISONEW	2015-06-04	15:18:10	35	4	PP12P120	29	3	137
ISONEW	2015-06-04	15:18:10	28	5	PP12P120	29	4	646
ISONEW	2015-06-04	15:18:10	29	1	PP12P120	29	5	26
ISONEW	2015-06-04	15:18:10	54	2	PP12P120	29	6	217
ISONEW	2015-06-04	15:18:10	23	3	PP12P120	29	7	13
ISONEW	2015-06-04	15:18:10	40	4	PP12P120	29	8	171
ISONEW	2015-06-04	15:18:10	57	2	NOSTIM	30	1	0
ISONEW	2015-06-04	15:18:10	34	3	NOSTIM	30	2	0
ISONEW	2015-06-04	15:18:10	35	4	NOSTIM	30	3	0
ISONEW	2015-06-04	15:18:10	28	5	NOSTIM	30	4	0
ISONEW	2015-06-04	15:18:10	29	1	NOSTIM	30	5	0
ISONEW	2015-06-04	15:18:10	54	2	NOSTIM	30	6	0
ISONEW	2015-06-04	15:18:10	23	3	NOSTIM	30	7	0
ISONEW	2015-06-04	15:18:10	40	4	NOSTIM	30	8	0
ISONEW	2015-06-04	15:18:10	57	2	P120	31	1	247
ISONEW	2015-06-04	15:18:10	34	3	P120	31	2	52
ISONEW	2015-06-04	15:18:10	35	4	P120	31	3	337
ISONEW	2015-06-04	15:18:10	28	5	P120	31	4	651
ISONEW	2015-06-04	15:18:10	29	1	P120	31	5	103
ISONEW	2015-06-04	15:18:10	54	2	P120	31	6	205
ISONEW	2015-06-04	15:18:10	23	3	P120	31	7	1140
ISONEW	2015-06-04	15:18:10	40	4	P120	31	8	343
ISONEW	2015-06-04	15:18:10	57	2	NOSTIM	32	1	0
ISONEW	2015-06-04	15:18:10	34	3	NOSTIM	32	2	0
ISONEW	2015-06-04	15:18:10	35	4	NOSTIM	32	3	0
ISONEW	2015-06-04	15:18:10	28	5	NOSTIM	32	4	0
ISONEW	2015-06-04	15:18:10	29	1	NOSTIM	32	5	0
ISONEW	2015-06-04	15:18:10	54	2	NOSTIM	32	6	0
ISONEW	2015-06-04	15:18:10	23	3	NOSTIM	32	7	0
ISONEW	2015-06-04	15:18:10	40	4	NOSTIM	32	8	0
ISONEW	2015-06-04	15:18:10	57	2	PP3P120	33	1	73
ISONEW	2015-06-04	15:18:10	34	3	PP3P120	33	2	74
ISONEW	2015-06-04	15:18:10	35	4	PP3P120	33	3	141
ISONEW	2015-06-04	15:18:10	28	5	PP3P120	33	4	671
ISONEW	2015-06-04	15:18:10	29	1	PP3P120	33	5	110
ISONEW	2015-06-04	15:18:10	54	2	PP3P120	33	6	410
ISONEW	2015-06-04	15:18:10	23	3	PP3P120	33	7	147
ISONEW	2015-06-04	15:18:10	40	4	PP3P120	33	8	409
ISONEW	2015-06-04	15:18:10	57	2	NOSTIM	34	1	0
ISONEW	2015-06-04	15:18:10	34	3	NOSTIM	34	2	0
ISONEW	2015-06-04	15:18:10	35	4	NOSTIM	34	3	0
ISONEW	2015-06-04	15:18:10	28	5	NOSTIM	34	4	4
ISONEW	2015-06-04	15:18:10	29	1	NOSTIM	34	5	0
ISONEW	2015-06-04	15:18:10	54	2	NOSTIM	34	6	0
ISONEW	2015-06-04	15:18:10	23	3	NOSTIM	34	7	0
ISONEW	2015-06-04	15:18:10	40	4	NOSTIM	34	8	0
ISONEW	2015-06-04	15:18:10	57	2	PP12P120	35	1	26
ISONEW	2015-06-04	15:18:10	34	3	PP12P120	35	2	4
ISONEW	2015-06-04	15:18:10	35	4	PP12P120	35	3	75
ISONEW	2015-06-04	15:18:10	28	5	PP12P120	35	4	461
ISONEW	2015-06-04	15:18:10	29	1	PP12P120	35	5	90
ISONEW	2015-06-04	15:18:10	54	2	PP12P120	35	6	67
ISONEW	2015-06-04	15:18:10	23	3	PP12P120	35	7	96
ISONEW	2015-06-04	15:18:10	40	4	PP12P120	35	8	364
ISONEW	2015-06-04	15:18:10	57	2	NOSTIM	36	1	0
ISONEW	2015-06-04	15:18:10	34	3	NOSTIM	36	2	0
ISONEW	2015-06-04	15:18:10	35	4	NOSTIM	36	3	0
ISONEW	2015-06-04	15:18:10	28	5	NOSTIM	36	4	2
ISONEW	2015-06-04	15:18:10	29	1	NOSTIM	36	5	0
ISONEW	2015-06-04	15:18:10	54	2	NOSTIM	36	6	0
ISONEW	2015-06-04	15:18:10	23	3	NOSTIM	36	7	0
ISONEW	2015-06-04	15:18:10	40	4	NOSTIM	36	8	0
ISONEW	2015-06-04	15:18:10	57	2	PP3P120	37	1	120
ISONEW	2015-06-04	15:18:10	34	3	PP3P120	37	2	27
ISONEW	2015-06-04	15:18:10	35	4	PP3P120	37	3	524
ISONEW	2015-06-04	15:18:10	28	5	PP3P120	37	4	266
ISONEW	2015-06-04	15:18:10	29	1	PP3P120	37	5	523
ISONEW	2015-06-04	15:18:10	54	2	PP3P120	37	6	237
ISONEW	2015-06-04	15:18:10	23	3	PP3P120	37	7	87
ISONEW	2015-06-04	15:18:10	40	4	PP3P120	37	8	565
ISONEW	2015-06-04	15:18:10	57	2	NOSTIM	38	1	0
ISONEW	2015-06-04	15:18:10	34	3	NOSTIM	38	2	0
ISONEW	2015-06-04	15:18:10	35	4	NOSTIM	38	3	1
ISONEW	2015-06-04	15:18:10	28	5	NOSTIM	38	4	3
ISONEW	2015-06-04	15:18:10	29	1	NOSTIM	38	5	0
ISONEW	2015-06-04	15:18:10	54	2	NOSTIM	38	6	0
ISONEW	2015-06-04	15:18:10	23	3	NOSTIM	38	7	0
ISONEW	2015-06-04	15:18:10	40	4	NOSTIM	38	8	0
ISONEW	2015-06-04	15:18:10	57	2	PP12P120	39	1	29
ISONEW	2015-06-04	15:18:10	34	3	PP12P120	39	2	0
ISONEW	2015-06-04	15:18:10	35	4	PP12P120	39	3	46
ISONEW	2015-06-04	15:18:10	28	5	PP12P120	39	4	529
ISONEW	2015-06-04	15:18:10	29	1	PP12P120	39	5	95
ISONEW	2015-06-04	15:18:10	54	2	PP12P120	39	6	13
ISONEW	2015-06-04	15:18:10	23	3	PP12P120	39	7	7
ISONEW	2015-06-04	15:18:10	40	4	PP12P120	39	8	229
ISONEW	2015-06-04	15:18:10	57	2	NOSTIM	40	1	0
ISONEW	2015-06-04	15:18:10	34	3	NOSTIM	40	2	0
ISONEW	2015-06-04	15:18:10	35	4	NOSTIM	40	3	0
ISONEW	2015-06-04	15:18:10	28	5	NOSTIM	40	4	1
ISONEW	2015-06-04	15:18:10	29	1	NOSTIM	40	5	0
ISONEW	2015-06-04	15:18:10	54	2	NOSTIM	40	6	0
ISONEW	2015-06-04	15:18:10	23	3	NOSTIM	40	7	0
ISONEW	2015-06-04	15:18:10	40	4	NOSTIM	40	8	0
ISONEW	2015-06-04	15:18:10	57	2	PP6P120	41	1	35
ISONEW	2015-06-04	15:18:10	34	3	PP6P120	41	2	3
ISONEW	2015-06-04	15:18:10	35	4	PP6P120	41	3	312
ISONEW	2015-06-04	15:18:10	28	5	PP6P120	41	4	403
ISONEW	2015-06-04	15:18:10	29	1	PP6P120	41	5	22
ISONEW	2015-06-04	15:18:10	54	2	PP6P120	41	6	16
ISONEW	2015-06-04	15:18:10	23	3	PP6P120	41	7	40
ISONEW	2015-06-04	15:18:10	40	4	PP6P120	41	8	352
ISONEW	2015-06-04	15:18:10	57	2	NOSTIM	42	1	0
ISONEW	2015-06-04	15:18:10	34	3	NOSTIM	42	2	0
ISONEW	2015-06-04	15:18:10	35	4	NOSTIM	42	3	0
ISONEW	2015-06-04	15:18:10	28	5	NOSTIM	42	4	1
ISONEW	2015-06-04	15:18:10	29	1	NOSTIM	42	5	0
ISONEW	2015-06-04	15:18:10	54	2	NOSTIM	42	6	0
ISONEW	2015-06-04	15:18:10	23	3	NOSTIM	42	7	0
ISONEW	2015-06-04	15:18:10	40	4	NOSTIM	42	8	0
ISONEW	2015-06-04	15:18:10	57	2	P120	43	1	117
ISONEW	2015-06-04	15:18:10	34	3	P120	43	2	40
ISONEW	2015-06-04	15:18:10	35	4	P120	43	3	221
ISONEW	2015-06-04	15:18:10	28	5	P120	43	4	1015
ISONEW	2015-06-04	15:18:10	29	1	P120	43	5	980
ISONEW	2015-06-04	15:18:10	54	2	P120	43	6	309
ISONEW	2015-06-04	15:18:10	23	3	P120	43	7	126
ISONEW	2015-06-04	15:18:10	40	4	P120	43	8	636
ISONEW	2015-06-04	15:18:10	57	2	NOSTIM	44	1	0
ISONEW	2015-06-04	15:18:10	34	3	NOSTIM	44	2	0
ISONEW	2015-06-04	15:18:10	35	4	NOSTIM	44	3	0
ISONEW	2015-06-04	15:18:10	28	5	NOSTIM	44	4	9
ISONEW	2015-06-04	15:18:10	29	1	NOSTIM	44	5	2
ISONEW	2015-06-04	15:18:10	54	2	NOSTIM	44	6	0
ISONEW	2015-06-04	15:18:10	23	3	NOSTIM	44	7	0
ISONEW	2015-06-04	15:18:10	40	4	NOSTIM	44	8	10
ISONEW	2015-06-04	15:18:10	57	2	PP3P120	45	1	30
ISONEW	2015-06-04	15:18:10	34	3	PP3P120	45	2	1
ISONEW	2015-06-04	15:18:10	35	4	PP3P120	45	3	249
ISONEW	2015-06-04	15:18:10	28	5	PP3P120	45	4	2515
ISONEW	2015-06-04	15:18:10	29	1	PP3P120	45	5	58
ISONEW	2015-06-04	15:18:10	54	2	PP3P120	45	6	185
ISONEW	2015-06-04	15:18:10	23	3	PP3P120	45	7	401
ISONEW	2015-06-04	15:18:10	40	4	PP3P120	45	8	780
ISONEW	2015-06-04	15:18:10	57	2	NOSTIM	46	1	0
ISONEW	2015-06-04	15:18:10	34	3	NOSTIM	46	2	0
ISONEW	2015-06-04	15:18:10	35	4	NOSTIM	46	3	0
ISONEW	2015-06-04	15:18:10	28	5	NOSTIM	46	4	1
ISONEW	2015-06-04	15:18:10	29	1	NOSTIM	46	5	0
ISONEW	2015-06-04	15:18:10	54	2	NOSTIM	46	6	0
ISONEW	2015-06-04	15:18:10	23	3	NOSTIM	46	7	0
ISONEW	2015-06-04	15:18:10	40	4	NOSTIM	46	8	0
ISONEW	2015-06-04	15:18:10	57	2	PP12P120	47	1	7
ISONEW	2015-06-04	15:18:10	34	3	PP12P120	47	2	0
ISONEW	2015-06-04	15:18:10	35	4	PP12P120	47	3	69
ISONEW	2015-06-04	15:18:10	28	5	PP12P120	47	4	558
ISONEW	2015-06-04	15:18:10	29	1	PP12P120	47	5	47
ISONEW	2015-06-04	15:18:10	54	2	PP12P120	47	6	5
ISONEW	2015-06-04	15:18:10	23	3	PP12P120	47	7	3
ISONEW	2015-06-04	15:18:10	40	4	PP12P120	47	8	292
ISONEW	2015-06-04	15:18:10	57	2	NOSTIM	48	1	0
ISONEW	2015-06-04	15:18:10	34	3	NOSTIM	48	2	0
ISONEW	2015-06-04	15:18:10	35	4	NOSTIM	48	3	0
ISONEW	2015-06-04	15:18:10	28	5	NOSTIM	48	4	3
ISONEW	2015-06-04	15:18:10	29	1	NOSTIM	48	5	0
ISONEW	2015-06-04	15:18:10	54	2	NOSTIM	48	6	0
ISONEW	2015-06-04	15:18:10	23	3	NOSTIM	48	7	0
ISONEW	2015-06-04	15:18:10	40	4	NOSTIM	48	8	0
ISONEW	2015-06-04	15:18:10	57	2	PP6P120	49	1	17
ISONEW	2015-06-04	15:18:10	34	3	PP6P120	49	2	0
ISONEW	2015-06-04	15:18:10	35	4	PP6P120	49	3	61
ISONEW	2015-06-04	15:18:10	28	5	PP6P120	49	4	806
ISONEW	2015-06-04	15:18:10	29	1	PP6P120	49	5	32
ISONEW	2015-06-04	15:18:10	54	2	PP6P120	49	6	14
ISONEW	2015-06-04	15:18:10	23	3	PP6P120	49	7	15
ISONEW	2015-06-04	15:18:10	40	4	PP6P120	49	8	317
ISONEW	2015-06-04	15:18:10	57	2	NOSTIM	50	1	0
ISONEW	2015-06-04	15:18:10	34	3	NOSTIM	50	2	0
ISONEW	2015-06-04	15:18:10	35	4	NOSTIM	50	3	0
ISONEW	2015-06-04	15:18:10	28	5	NOSTIM	50	4	8
ISONEW	2015-06-04	15:18:10	29	1	NOSTIM	50	5	2
ISONEW	2015-06-04	15:18:10	54	2	NOSTIM	50	6	0
ISONEW	2015-06-04	15:18:10	23	3	NOSTIM	50	7	0
ISONEW	2015-06-04	15:18:10	40	4	NOSTIM	50	8	0
ISONEW	2015-06-04	15:18:10	57	2	P120	51	1	95
ISONEW	2015-06-04	15:18:10	34	3	P120	51	2	4
ISONEW	2015-06-04	15:18:10	35	4	P120	51	3	192
ISONEW	2015-06-04	15:18:10	28	5	P120	51	4	798
ISONEW	2015-06-04	15:18:10	29	1	P120	51	5	265
ISONEW	2015-06-04	15:18:10	54	2	P120	51	6	185
ISONEW	2015-06-04	15:18:10	23	3	P120	51	7	32
ISONEW	2015-06-04	15:18:10	40	4	P120	51	8	318
ISONEW	2015-06-04	15:18:10	57	2	NOSTIM	52	1	0
ISONEW	2015-06-04	15:18:10	34	3	NOSTIM	52	2	0
ISONEW	2015-06-04	15:18:10	35	4	NOSTIM	52	3	0
ISONEW	2015-06-04	15:18:10	28	5	NOSTIM	52	4	0
ISONEW	2015-06-04	15:18:10	29	1	NOSTIM	52	5	0
ISONEW	2015-06-04	15:18:10	54	2	NOSTIM	52	6	0
ISONEW	2015-06-04	15:18:10	23	3	NOSTIM	52	7	0
ISONEW	2015-06-04	15:18:10	40	4	NOSTIM	52	8	0
ISONEW	2015-06-04	15:18:10	57	2	PP3P120	53	1	35
ISONEW	2015-06-04	15:18:10	34	3	PP3P120	53	2	4
ISONEW	2015-06-04	15:18:10	35	4	PP3P120	53	3	205
ISONEW	2015-06-04	15:18:10	28	5	PP3P120	53	4	959
ISONEW	2015-06-04	15:18:10	29	1	PP3P120	53	5	345
ISONEW	2015-06-04	15:18:10	54	2	PP3P120	53	6	17
ISONEW	2015-06-04	15:18:10	23	3	PP3P120	53	7	158
ISONEW	2015-06-04	15:18:10	40	4	PP3P120	53	8	365
ISONEW	2015-06-04	15:18:10	57	2	NOSTIM	54	1	0
ISONEW	2015-06-04	15:18:10	34	3	NOSTIM	54	2	0
ISONEW	2015-06-04	15:18:10	35	4	NOSTIM	54	3	0
ISONEW	2015-06-04	15:18:10	28	5	NOSTIM	54	4	2
ISONEW	2015-06-04	15:18:10	29	1	NOSTIM	54	5	0
ISONEW	2015-06-04	15:18:10	54	2	NOSTIM	54	6	0
ISONEW	2015-06-04	15:18:10	23	3	NOSTIM	54	7	0
ISONEW	2015-06-04	15:18:10	40	4	NOSTIM	54	8	0
ISONEW	2015-06-04	15:18:10	57	2	PP12P120	55	1	20
ISONEW	2015-06-04	15:18:10	34	3	PP12P120	55	2	3
ISONEW	2015-06-04	15:18:10	35	4	PP12P120	55	3	23
ISONEW	2015-06-04	15:18:10	28	5	PP12P120	55	4	889
ISONEW	2015-06-04	15:18:10	29	1	PP12P120	55	5	12
ISONEW	2015-06-04	15:18:10	54	2	PP12P120	55	6	69
ISONEW	2015-06-04	15:18:10	23	3	PP12P120	55	7	1
ISONEW	2015-06-04	15:18:10	40	4	PP12P120	55	8	392
ISONEW	2015-06-04	15:18:10	57	2	NOSTIM	56	1	0
ISONEW	2015-06-04	15:18:10	34	3	NOSTIM	56	2	0
ISONEW	2015-06-04	15:18:10	35	4	NOSTIM	56	3	0
ISONEW	2015-06-04	15:18:10	28	5	NOSTIM	56	4	3
ISONEW	2015-06-04	15:18:10	29	1	NOSTIM	56	5	0
ISONEW	2015-06-04	15:18:10	54	2	NOSTIM	56	6	0
ISONEW	2015-06-04	15:18:10	23	3	NOSTIM	56	7	0
ISONEW	2015-06-04	15:18:10	40	4	NOSTIM	56	8	6
ISONEW	2015-06-04	15:18:10	57	2	P120	57	1	180
ISONEW	2015-06-04	15:18:10	34	3	P120	57	2	13
ISONEW	2015-06-04	15:18:10	35	4	P120	57	3	266
ISONEW	2015-06-04	15:18:10	28	5	P120	57	4	435
ISONEW	2015-06-04	15:18:10	29	1	P120	57	5	111
ISONEW	2015-06-04	15:18:10	54	2	P120	57	6	278
ISONEW	2015-06-04	15:18:10	23	3	P120	57	7	225
ISONEW	2015-06-04	15:18:10	40	4	P120	57	8	728
ISONEW	2015-06-04	15:18:10	57	2	NOSTIM	58	1	0
ISONEW	2015-06-04	15:18:10	34	3	NOSTIM	58	2	0
ISONEW	2015-06-04	15:18:10	35	4	NOSTIM	58	3	2
ISONEW	2015-06-04	15:18:10	28	5	NOSTIM	58	4	1
ISONEW	2015-06-04	15:18:10	29	1	NOSTIM	58	5	0
ISONEW	2015-06-04	15:18:10	54	2	NOSTIM	58	6	0
ISONEW	2015-06-04	15:18:10	23	3	NOSTIM	58	7	0
ISONEW	2015-06-04	15:18:10	40	4	NOSTIM	58	8	0
ISONEW	2015-06-04	15:18:10	57	2	PP6P120	59	1	15
ISONEW	2015-06-04	15:18:10	34	3	PP6P120	59	2	1
ISONEW	2015-06-04	15:18:10	35	4	PP6P120	59	3	201
ISONEW	2015-06-04	15:18:10	28	5	PP6P120	59	4	399
ISONEW	2015-06-04	15:18:10	29	1	PP6P120	59	5	383
ISONEW	2015-06-04	15:18:10	54	2	PP6P120	59	6	36
ISONEW	2015-06-04	15:18:10	23	3	PP6P120	59	7	15
ISONEW	2015-06-04	15:18:10	40	4	PP6P120	59	8	313
ISONEW	2015-06-04	15:18:10	57	2	NOSTIM	60	1	0
ISONEW	2015-06-04	15:18:10	34	3	NOSTIM	60	2	0
ISONEW	2015-06-04	15:18:10	35	4	NOSTIM	60	3	0
ISONEW	2015-06-04	15:18:10	28	5	NOSTIM	60	4	0
ISONEW	2015-06-04	15:18:10	29	1	NOSTIM	60	5	0
ISONEW	2015-06-04	15:18:10	54	2	NOSTIM	60	6	0
ISONEW	2015-06-04	15:18:10	23	3	NOSTIM	60	7	0
ISONEW	2015-06-04	15:18:10	40	4	NOSTIM	60	8	0
ISONEW	2015-06-04	15:18:10	57	2	PP6P120	61	1	51
ISONEW	2015-06-04	15:18:10	34	3	PP6P120	61	2	19
ISONEW	2015-06-04	15:18:10	35	4	PP6P120	61	3	238
ISONEW	2015-06-04	15:18:10	28	5	PP6P120	61	4	330
ISONEW	2015-06-04	15:18:10	29	1	PP6P120	61	5	130
ISONEW	2015-06-04	15:18:10	54	2	PP6P120	61	6	82
ISONEW	2015-06-04	15:18:10	23	3	PP6P120	61	7	19
ISONEW	2015-06-04	15:18:10	40	4	PP6P120	61	8	329
ISONEW	2015-06-04	15:18:10	57	2	NOSTIM	62	1	0
ISONEW	2015-06-04	15:18:10	34	3	NOSTIM	62	2	0
ISONEW	2015-06-04	15:18:10	35	4	NOSTIM	62	3	0
ISONEW	2015-06-04	15:18:10	28	5	NOSTIM	62	4	1
ISONEW	2015-06-04	15:18:10	29	1	NOSTIM	62	5	9
ISONEW	2015-06-04	15:18:10	54	2	NOSTIM	62	6	0
ISONEW	2015-06-04	15:18:10	23	3	NOSTIM	62	7	0
ISONEW	2015-06-04	15:18:10	40	4	NOSTIM	62	8	0
ISONEW	2015-06-04	15:18:10	57	2	PP12P120	63	1	44
ISONEW	2015-06-04	15:18:10	34	3	PP12P120	63	2	9
ISONEW	2015-06-04	15:18:10	35	4	PP12P120	63	3	66
ISONEW	2015-06-04	15:18:10	28	5	PP12P120	63	4	375
ISONEW	2015-06-04	15:18:10	29	1	PP12P120	63	5	152
ISONEW	2015-06-04	15:18:10	54	2	PP12P120	63	6	128
ISONEW	2015-06-04	15:18:10	23	3	PP12P120	63	7	24
ISONEW	2015-06-04	15:18:10	40	4	PP12P120	63	8	196
ISONEW	2015-06-04	15:18:10	57	2	NOSTIM	64	1	0
ISONEW	2015-06-04	15:18:10	34	3	NOSTIM	64	2	0
ISONEW	2015-06-04	15:18:10	35	4	NOSTIM	64	3	0
ISONEW	2015-06-04	15:18:10	28	5	NOSTIM	64	4	9
ISONEW	2015-06-04	15:18:10	29	1	NOSTIM	64	5	26
ISONEW	2015-06-04	15:18:10	54	2	NOSTIM	64	6	0
ISONEW	2015-06-04	15:18:10	23	3	NOSTIM	64	7	0
ISONEW	2015-06-04	15:18:10	40	4	NOSTIM	64	8	0
ISONEW	2015-06-04	15:18:10	57	2	PP3P120	65	1	113
ISONEW	2015-06-04	15:18:10	34	3	PP3P120	65	2	30
ISONEW	2015-06-04	15:18:10	35	4	PP3P120	65	3	679
ISONEW	2015-06-04	15:18:10	28	5	PP3P120	65	4	564
ISONEW	2015-06-04	15:18:10	29	1	PP3P120	65	5	272
ISONEW	2015-06-04	15:18:10	54	2	PP3P120	65	6	167
ISONEW	2015-06-04	15:18:10	23	3	PP3P120	65	7	46
ISONEW	2015-06-04	15:18:10	40	4	PP3P120	65	8	283
ISONEW	2015-06-04	15:18:10	57	2	NOSTIM	66	1	0
ISONEW	2015-06-04	15:18:10	34	3	NOSTIM	66	2	0
ISONEW	2015-06-04	15:18:10	35	4	NOSTIM	66	3	0
ISONEW	2015-06-04	15:18:10	28	5	NOSTIM	66	4	2
ISONEW	2015-06-04	15:18:10	29	1	NOSTIM	66	5	3
ISONEW	2015-06-04	15:18:10	54	2	NOSTIM	66	6	0
ISONEW	2015-06-04	15:18:10	23	3	NOSTIM	66	7	0
ISONEW	2015-06-04	15:18:10	40	4	NOSTIM	66	8	0
ISONEW	2015-06-04	15:18:10	57	2	P120	67	1	132
ISONEW	2015-06-04	15:18:10	34	3	P120	67	2	87
ISONEW	2015-06-04	15:18:10	35	4	P120	67	3	210
ISONEW	2015-06-04	15:18:10	28	5	P120	67	4	618
ISONEW	2015-06-04	15:18:10	29	1	P120	67	5	603
ISONEW	2015-06-04	15:18:10	54	2	P120	67	6	96
ISONEW	2015-06-04	15:18:10	23	3	P120	67	7	127
ISONEW	2015-06-04	15:18:10	40	4	P120	67	8	889
ISONEW	2015-06-04	15:18:10	57	2	NOSTIM	68	1	0
ISONEW	2015-06-04	15:18:10	34	3	NOSTIM	68	2	0
ISONEW	2015-06-04	15:18:10	35	4	NOSTIM	68	3	0
ISONEW	2015-06-04	15:18:10	28	5	NOSTIM	68	4	2
ISONEW	2015-06-04	15:18:10	29	1	NOSTIM	68	5	0
ISONEW	2015-06-04	15:18:10	54	2	NOSTIM	68	6	0
ISONEW	2015-06-04	15:18:10	23	3	NOSTIM	68	7	0
ISONEW	2015-06-04	15:18:10	40	4	NOSTIM	68	8	0
ISONEW	2015-06-04	15:18:10	57	2	PP6P120	69	1	20
ISONEW	2015-06-04	15:18:10	34	3	PP6P120	69	2	9
ISONEW	2015-06-04	15:18:10	35	4	PP6P120	69	3	339
ISONEW	2015-06-04	15:18:10	28	5	PP6P120	69	4	414
ISONEW	2015-06-04	15:18:10	29	1	PP6P120	69	5	119
ISONEW	2015-06-04	15:18:10	54	2	PP6P120	69	6	16
ISONEW	2015-06-04	15:18:10	23	3	PP6P120	69	7	18
ISONEW	2015-06-04	15:18:10	40	4	PP6P120	69	8	374
ISONEW	2015-06-04	15:18:10	57	2	NOSTIM	70	1	0
ISONEW	2015-06-04	15:18:10	34	3	NOSTIM	70	2	0
ISONEW	2015-06-04	15:18:10	35	4	NOSTIM	70	3	0
ISONEW	2015-06-04	15:18:10	28	5	NOSTIM	70	4	0
ISONEW	2015-06-04	15:18:10	29	1	NOSTIM	70	5	0
ISONEW	2015-06-04	15:18:10	54	2	NOSTIM	70	6	0
ISONEW	2015-06-04	15:18:10	23	3	NOSTIM	70	7	0
ISONEW	2015-06-04	15:18:10	40	4	NOSTIM	70	8	0
ISONEW	2015-06-04	15:18:10	57	2	PP3P120	71	1	209
ISONEW	2015-06-04	15:18:10	34	3	PP3P120	71	2	37
ISONEW	2015-06-04	15:18:10	35	4	PP3P120	71	3	187
ISONEW	2015-06-04	15:18:10	28	5	PP3P120	71	4	645
ISONEW	2015-06-04	15:18:10	29	1	PP3P120	71	5	112
ISONEW	2015-06-04	15:18:10	54	2	PP3P120	71	6	51
ISONEW	2015-06-04	15:18:10	23	3	PP3P120	71	7	32
ISONEW	2015-06-04	15:18:10	40	4	PP3P120	71	8	491
ISONEW	2015-06-04	15:18:10	57	2	NOSTIM	72	1	0
ISONEW	2015-06-04	15:18:10	34	3	NOSTIM	72	2	0
ISONEW	2015-06-04	15:18:10	35	4	NOSTIM	72	3	0
ISONEW	2015-06-04	15:18:10	28	5	NOSTIM	72	4	2
ISONEW	2015-06-04	15:18:10	29	1	NOSTIM	72	5	0
ISONEW	2015-06-04	15:18:10	54	2	NOSTIM	72	6	0
ISONEW	2015-06-04	15:18:10	23	3	NOSTIM	72	7	0
ISONEW	2015-06-04	15:18:10	40	4	NOSTIM	72	8	0
ISONEW	2015-06-04	15:18:10	57	2	PP6P120	73	1	72
ISONEW	2015-06-04	15:18:10	34	3	PP6P120	73	2	18
ISONEW	2015-06-04	15:18:10	35	4	PP6P120	73	3	65
ISONEW	2015-06-04	15:18:10	28	5	PP6P120	73	4	956
ISONEW	2015-06-04	15:18:10	29	1	PP6P120	73	5	59
ISONEW	2015-06-04	15:18:10	54	2	PP6P120	73	6	14
ISONEW	2015-06-04	15:18:10	23	3	PP6P120	73	7	4
ISONEW	2015-06-04	15:18:10	40	4	PP6P120	73	8	508
ISONEW	2015-06-04	15:18:10	57	2	NOSTIM	74	1	0
ISONEW	2015-06-04	15:18:10	34	3	NOSTIM	74	2	0
ISONEW	2015-06-04	15:18:10	35	4	NOSTIM	74	3	0
ISONEW	2015-06-04	15:18:10	28	5	NOSTIM	74	4	1
ISONEW	2015-06-04	15:18:10	29	1	NOSTIM	74	5	0
ISONEW	2015-06-04	15:18:10	54	2	NOSTIM	74	6	0
ISONEW	2015-06-04	15:18:10	23	3	NOSTIM	74	7	0
ISONEW	2015-06-04	15:18:10	40	4	NOSTIM	74	8	0
ISONEW	2015-06-04	15:18:10	57	2	P120	75	1	303
ISONEW	2015-06-04	15:18:10	34	3	P120	75	2	143
ISONEW	2015-06-04	15:18:10	35	4	P120	75	3	541
ISONEW	2015-06-04	15:18:10	28	5	P120	75	4	714
ISONEW	2015-06-04	15:18:10	29	1	P120	75	5	1096
ISONEW	2015-06-04	15:18:10	54	2	P120	75	6	387
ISONEW	2015-06-04	15:18:10	23	3	P120	75	7	62
ISONEW	2015-06-04	15:18:10	40	4	P120	75	8	236
ISONEW	2015-06-04	15:18:10	57	2	NOSTIM	76	1	0
ISONEW	2015-06-04	15:18:10	34	3	NOSTIM	76	2	0
ISONEW	2015-06-04	15:18:10	35	4	NOSTIM	76	3	0
ISONEW	2015-06-04	15:18:10	28	5	NOSTIM	76	4	0
ISONEW	2015-06-04	15:18:10	29	1	NOSTIM	76	5	0
ISONEW	2015-06-04	15:18:10	54	2	NOSTIM	76	6	0
ISONEW	2015-06-04	15:18:10	23	3	NOSTIM	76	7	0
ISONEW	2015-06-04	15:18:10	40	4	NOSTIM	76	8	0
ISONEW	2015-06-04	15:18:10	57	2	PP12P120	77	1	11
ISONEW	2015-06-04	15:18:10	34	3	PP12P120	77	2	5
ISONEW	2015-06-04	15:18:10	35	4	PP12P120	77	3	20
ISONEW	2015-06-04	15:18:10	28	5	PP12P120	77	4	345
ISONEW	2015-06-04	15:18:10	29	1	PP12P120	77	5	26
ISONEW	2015-06-04	15:18:10	54	2	PP12P120	77	6	38
ISONEW	2015-06-04	15:18:10	23	3	PP12P120	77	7	28
ISONEW	2015-06-04	15:18:10	40	4	PP12P120	77	8	306
ISONEW	2015-06-04	15:18:10	57	2	NOSTIM	78	1	0
ISONEW	2015-06-04	15:18:10	34	3	NOSTIM	78	2	0
ISONEW	2015-06-04	15:18:10	35	4	NOSTIM	78	3	0
ISONEW	2015-06-04	15:18:10	28	5	NOSTIM	78	4	3
ISONEW	2015-06-04	15:18:10	29	1	NOSTIM	78	5	0
ISONEW	2015-06-04	15:18:10	54	2	NOSTIM	78	6	0
ISONEW	2015-06-04	15:18:10	23	3	NOSTIM	78	7	0
ISONEW	2015-06-04	15:18:10	40	4	NOSTIM	78	8	0
ISONEW	2015-06-04	15:18:10	57	2	P120	79	1	175
ISONEW	2015-06-04	15:18:10	34	3	P120	79	2	116
ISONEW	2015-06-04	15:18:10	35	4	P120	79	3	121
ISONEW	2015-06-04	15:18:10	28	5	P120	79	4	893
ISONEW	2015-06-04	15:18:10	29	1	P120	79	5	402
ISONEW	2015-06-04	15:18:10	54	2	P120	79	6	341
ISONEW	2015-06-04	15:18:10	23	3	P120	79	7	41
ISONEW	2015-06-04	15:18:10	40	4	P120	79	8	364
ISONEW	2015-06-04	15:18:10	57	2	NOSTIM	80	1	0
ISONEW	2015-06-04	15:18:10	34	3	NOSTIM	80	2	0
ISONEW	2015-06-04	15:18:10	35	4	NOSTIM	80	3	0
ISONEW	2015-06-04	15:18:10	28	5	NOSTIM	80	4	0
ISONEW	2015-06-04	15:18:10	29	1	NOSTIM	80	5	0
ISONEW	2015-06-04	15:18:10	54	2	NOSTIM	80	6	0
ISONEW	2015-06-04	15:18:10	23	3	NOSTIM	80	7	0
ISONEW	2015-06-04	15:18:10	40	4	NOSTIM	80	8	0
ISONEW	2015-06-04	15:18:10	57	2	PP3P120	81	1	200
ISONEW	2015-06-04	15:18:10	34	3	PP3P120	81	2	83
ISONEW	2015-06-04	15:18:10	35	4	PP3P120	81	3	268
ISONEW	2015-06-04	15:18:10	28	5	PP3P120	81	4	774
ISONEW	2015-06-04	15:18:10	29	1	PP3P120	81	5	87
ISONEW	2015-06-04	15:18:10	54	2	PP3P120	81	6	135
ISONEW	2015-06-04	15:18:10	23	3	PP3P120	81	7	81
ISONEW	2015-06-04	15:18:10	40	4	PP3P120	81	8	386
ISONEW	2015-06-04	15:18:10	57	2	NOSTIM	82	1	0
ISONEW	2015-06-04	15:18:10	34	3	NOSTIM	82	2	0
ISONEW	2015-06-04	15:18:10	35	4	NOSTIM	82	3	0
ISONEW	2015-06-04	15:18:10	28	5	NOSTIM	82	4	9
ISONEW	2015-06-04	15:18:10	29	1	NOSTIM	82	5	0
ISONEW	2015-06-04	15:18:10	54	2	NOSTIM	82	6	0
ISONEW	2015-06-04	15:18:10	23	3	NOSTIM	82	7	0
ISONEW	2015-06-04	15:18:10	40	4	NOSTIM	82	8	1
ISONEW	2015-06-04	15:18:10	57	2	PP12P120	83	1	20
ISONEW	2015-06-04	15:18:10	34	3	PP12P120	83	2	9
ISONEW	2015-06-04	15:18:10	35	4	PP12P120	83	3	45
ISONEW	2015-06-04	15:18:10	28	5	PP12P120	83	4	434
ISONEW	2015-06-04	15:18:10	29	1	PP12P120	83	5	95
ISONEW	2015-06-04	15:18:10	54	2	PP12P120	83	6	22
ISONEW	2015-06-04	15:18:10	23	3	PP12P120	83	7	4
ISONEW	2015-06-04	15:18:10	40	4	PP12P120	83	8	310
ISONEW	2015-06-04	15:18:10	57	2	NOSTIM	84	1	0
ISONEW	2015-06-04	15:18:10	34	3	NOSTIM	84	2	0
ISONEW	2015-06-04	15:18:10	35	4	NOSTIM	84	3	0
ISONEW	2015-06-04	15:18:10	28	5	NOSTIM	84	4	5
ISONEW	2015-06-04	15:18:10	29	1	NOSTIM	84	5	3
ISONEW	2015-06-04	15:18:10	54	2	NOSTIM	84	6	0
ISONEW	2015-06-04	15:18:10	23	3	NOSTIM	84	7	0
ISONEW	2015-06-04	15:18:10	40	4	NOSTIM	84	8	0
ISONEW	2015-06-04	15:18:10	57	2	PP3P120	85	1	203
ISONEW	2015-06-04	15:18:10	34	3	PP3P120	85	2	10
ISONEW	2015-06-04	15:18:10	35	4	PP3P120	85	3	301
ISONEW	2015-06-04	15:18:10	28	5	PP3P120	85	4	567
ISONEW	2015-06-04	15:18:10	29	1	PP3P120	85	5	590
ISONEW	2015-06-04	15:18:10	54	2	PP3P120	85	6	59
ISONEW	2015-06-04	15:18:10	23	3	PP3P120	85	7	108
ISONEW	2015-06-04	15:18:10	40	4	PP3P120	85	8	593
ISONEW	2015-06-04	15:18:10	57	2	NOSTIM	86	1	0
ISONEW	2015-06-04	15:18:10	34	3	NOSTIM	86	2	0
ISONEW	2015-06-04	15:18:10	35	4	NOSTIM	86	3	3
ISONEW	2015-06-04	15:18:10	28	5	NOSTIM	86	4	1
ISONEW	2015-06-04	15:18:10	29	1	NOSTIM	86	5	10
ISONEW	2015-06-04	15:18:10	54	2	NOSTIM	86	6	0
ISONEW	2015-06-04	15:18:10	23	3	NOSTIM	86	7	0
ISONEW	2015-06-04	15:18:10	40	4	NOSTIM	86	8	3
ISONEW	2015-06-04	15:18:10	57	2	PP12P120	87	1	16
ISONEW	2015-06-04	15:18:10	34	3	PP12P120	87	2	11
ISONEW	2015-06-04	15:18:10	35	4	PP12P120	87	3	111
ISONEW	2015-06-04	15:18:10	28	5	PP12P120	87	4	751
ISONEW	2015-06-04	15:18:10	29	1	PP12P120	87	5	103
ISONEW	2015-06-04	15:18:10	54	2	PP12P120	87	6	4
ISONEW	2015-06-04	15:18:10	23	3	PP12P120	87	7	5
ISONEW	2015-06-04	15:18:10	40	4	PP12P120	87	8	301
ISONEW	2015-06-04	15:18:10	57	2	NOSTIM	88	1	0
ISONEW	2015-06-04	15:18:10	34	3	NOSTIM	88	2	0
ISONEW	2015-06-04	15:18:10	35	4	NOSTIM	88	3	0
ISONEW	2015-06-04	15:18:10	28	5	NOSTIM	88	4	2
ISONEW	2015-06-04	15:18:10	29	1	NOSTIM	88	5	0
ISONEW	2015-06-04	15:18:10	54	2	NOSTIM	88	6	0
ISONEW	2015-06-04	15:18:10	23	3	NOSTIM	88	7	0
ISONEW	2015-06-04	15:18:10	40	4	NOSTIM	88	8	0
ISONEW	2015-06-04	15:18:10	57	2	PP6P120	89	1	147
ISONEW	2015-06-04	15:18:10	34	3	PP6P120	89	2	3
ISONEW	2015-06-04	15:18:10	35	4	PP6P120	89	3	160
ISONEW	2015-06-04	15:18:10	28	5	PP6P120	89	4	310
ISONEW	2015-06-04	15:18:10	29	1	PP6P120	89	5	218
ISONEW	2015-06-04	15:18:10	54	2	PP6P120	89	6	39
ISONEW	2015-06-04	15:18:10	23	3	PP6P120	89	7	64
ISONEW	2015-06-04	15:18:10	40	4	PP6P120	89	8	244
ISONEW	2015-06-04	15:18:10	57	2	NOSTIM	90	1	0
ISONEW	2015-06-04	15:18:10	34	3	NOSTIM	90	2	0
ISONEW	2015-06-04	15:18:10	35	4	NOSTIM	90	3	0
ISONEW	2015-06-04	15:18:10	28	5	NOSTIM	90	4	1
ISONEW	2015-06-04	15:18:10	29	1	NOSTIM	90	5	0
ISONEW	2015-06-04	15:18:10	54	2	NOSTIM	90	6	0
ISONEW	2015-06-04	15:18:10	23	3	NOSTIM	90	7	0
ISONEW	2015-06-04	15:18:10	40	4	NOSTIM	90	8	5
ISONEW	2015-06-04	15:18:10	57	2	P120	91	1	227
ISONEW	2015-06-04	15:18:10	34	3	P120	91	2	493
ISONEW	2015-06-04	15:18:10	35	4	P120	91	3	169
ISONEW	2015-06-04	15:18:10	28	5	P120	91	4	247
ISONEW	2015-06-04	15:18:10	29	1	P120	91	5	790
ISONEW	2015-06-04	15:18:10	54	2	P120	91	6	292
ISONEW	2015-06-04	15:18:10	23	3	P120	91	7	48
ISONEW	2015-06-04	15:18:10	40	4	P120	91	8	501
ISONEW	2015-06-04	15:18:10	57	2	NOSTIM	92	1	0
ISONEW	2015-06-04	15:18:10	34	3	NOSTIM	92	2	0
ISONEW	2015-06-04	15:18:10	35	4	NOSTIM	92	3	0
ISONEW	2015-06-04	15:18:10	28	5	NOSTIM	92	4	1
ISONEW	2015-06-04	15:18:10	29	1	NOSTIM	92	5	0
ISONEW	2015-06-04	15:18:10	54	2	NOSTIM	92	6	0
ISONEW	2015-06-04	15:18:10	23	3	NOSTIM	92	7	0
ISONEW	2015-06-04	15:18:10	40	4	NOSTIM	92	8	0
ISONEW	2015-06-04	15:18:10	57	2	PP3P120	93	1	163
ISONEW	2015-06-04	15:18:10	34	3	PP3P120	93	2	7
ISONEW	2015-06-04	15:18:10	35	4	PP3P120	93	3	747
ISONEW	2015-06-04	15:18:10	28	5	PP3P120	93	4	394
ISONEW	2015-06-04	15:18:10	29	1	PP3P120	93	5	398
ISONEW	2015-06-04	15:18:10	54	2	PP3P120	93	6	73
ISONEW	2015-06-04	15:18:10	23	3	PP3P120	93	7	273
ISONEW	2015-06-04	15:18:10	40	4	PP3P120	93	8	832
ISONEW	2015-06-04	15:18:10	57	2	NOSTIM	94	1	0
ISONEW	2015-06-04	15:18:10	34	3	NOSTIM	94	2	0
ISONEW	2015-06-04	15:18:10	35	4	NOSTIM	94	3	0
ISONEW	2015-06-04	15:18:10	28	5	NOSTIM	94	4	0
ISONEW	2015-06-04	15:18:10	29	1	NOSTIM	94	5	0
ISONEW	2015-06-04	15:18:10	54	2	NOSTIM	94	6	0
ISONEW	2015-06-04	15:18:10	23	3	NOSTIM	94	7	0
ISONEW	2015-06-04	15:18:10	40	4	NOSTIM	94	8	0
ISONEW	2015-06-04	15:18:10	57	2	PP12P120	95	1	36
ISONEW	2015-06-04	15:18:10	34	3	PP12P120	95	2	16
ISONEW	2015-06-04	15:18:10	35	4	PP12P120	95	3	63
ISONEW	2015-06-04	15:18:10	28	5	PP12P120	95	4	517
ISONEW	2015-06-04	15:18:10	29	1	PP12P120	95	5	42
ISONEW	2015-06-04	15:18:10	54	2	PP12P120	95	6	6
ISONEW	2015-06-04	15:18:10	23	3	PP12P120	95	7	21
ISONEW	2015-06-04	15:18:10	40	4	PP12P120	95	8	263
ISONEW	2015-06-04	15:18:10	57	2	NOSTIM	96	1	0
ISONEW	2015-06-04	15:18:10	34	3	NOSTIM	96	2	0
ISONEW	2015-06-04	15:18:10	35	4	NOSTIM	96	3	0
ISONEW	2015-06-04	15:18:10	28	5	NOSTIM	96	4	2
ISONEW	2015-06-04	15:18:10	29	1	NOSTIM	96	5	0
ISONEW	2015-06-04	15:18:10	54	2	NOSTIM	96	6	0
ISONEW	2015-06-04	15:18:10	23	3	NOSTIM	96	7	0
ISONEW	2015-06-04	15:18:10	40	4	NOSTIM	96	8	0
ISONEW	2015-06-04	15:18:10	57	2	PP6P120	97	1	23
ISONEW	2015-06-04	15:18:10	34	3	PP6P120	97	2	3
ISONEW	2015-06-04	15:18:10	35	4	PP6P120	97	3	155
ISONEW	2015-06-04	15:18:10	28	5	PP6P120	97	4	1016
ISONEW	2015-06-04	15:18:10	29	1	PP6P120	97	5	184
ISONEW	2015-06-04	15:18:10	54	2	PP6P120	97	6	15
ISONEW	2015-06-04	15:18:10	23	3	PP6P120	97	7	37
ISONEW	2015-06-04	15:18:10	40	4	PP6P120	97	8	641
ISONEW	2015-06-04	15:18:10	57	2	NOSTIM	98	1	0
ISONEW	2015-06-04	15:18:10	34	3	NOSTIM	98	2	0
ISONEW	2015-06-04	15:18:10	35	4	NOSTIM	98	3	0
ISONEW	2015-06-04	15:18:10	28	5	NOSTIM	98	4	13
ISONEW	2015-06-04	15:18:10	29	1	NOSTIM	98	5	0
ISONEW	2015-06-04	15:18:10	54	2	NOSTIM	98	6	0
ISONEW	2015-06-04	15:18:10	23	3	NOSTIM	98	7	0
ISONEW	2015-06-04	15:18:10	40	4	NOSTIM	98	8	0
ISONEW	2015-06-04	15:18:10	57	2	P120	99	1	464
ISONEW	2015-06-04	15:18:10	34	3	P120	99	2	62
ISONEW	2015-06-04	15:18:10	35	4	P120	99	3	303
ISONEW	2015-06-04	15:18:10	28	5	P120	99	4	593
ISONEW	2015-06-04	15:18:10	29	1	P120	99	5	169
ISONEW	2015-06-04	15:18:10	54	2	P120	99	6	117
ISONEW	2015-06-04	15:18:10	23	3	P120	99	7	422
ISONEW	2015-06-04	15:18:10	40	4	P120	99	8	262
ISONEW	2015-06-04	15:18:10	57	2	NOSTIM	100	1	0
ISONEW	2015-06-04	15:18:10	34	3	NOSTIM	100	2	0
ISONEW	2015-06-04	15:18:10	35	4	NOSTIM	100	3	0
ISONEW	2015-06-04	15:18:10	28	5	NOSTIM	100	4	1
ISONEW	2015-06-04	15:18:10	29	1	NOSTIM	100	5	0
ISONEW	2015-06-04	15:18:10	54	2	NOSTIM	100	6	0
ISONEW	2015-06-04	15:18:10	23	3	NOSTIM	100	7	0
ISONEW	2015-06-04	15:18:10	40	4	NOSTIM	100	8	0
ISONEW	2015-06-04	15:18:10	57	2	PP3P120	101	1	107
ISONEW	2015-06-04	15:18:10	34	3	PP3P120	101	2	281
ISONEW	2015-06-04	15:18:10	35	4	PP3P120	101	3	129
ISONEW	2015-06-04	15:18:10	28	5	PP3P120	101	4	788
ISONEW	2015-06-04	15:18:10	29	1	PP3P120	101	5	236
ISONEW	2015-06-04	15:18:10	54	2	PP3P120	101	6	32
ISONEW	2015-06-04	15:18:10	23	3	PP3P120	101	7	27
ISONEW	2015-06-04	15:18:10	40	4	PP3P120	101	8	387
ISONEW	2015-06-04	15:18:10	57	2	NOSTIM	102	1	0
ISONEW	2015-06-04	15:18:10	34	3	NOSTIM	102	2	0
ISONEW	2015-06-04	15:18:10	35	4	NOSTIM	102	3	0
ISONEW	2015-06-04	15:18:10	28	5	NOSTIM	102	4	2
ISONEW	2015-06-04	15:18:10	29	1	NOSTIM	102	5	0
ISONEW	2015-06-04	15:18:10	54	2	NOSTIM	102	6	0
ISONEW	2015-06-04	15:18:10	23	3	NOSTIM	102	7	0
ISONEW	2015-06-04	15:18:10	40	4	NOSTIM	102	8	0
ISONEW	2015-06-04	15:18:10	57	2	PP12P120	103	1	25
ISONEW	2015-06-04	15:18:10	34	3	PP12P120	103	2	6
ISONEW	2015-06-04	15:18:10	35	4	PP12P120	103	3	48
ISONEW	2015-06-04	15:18:10	28	5	PP12P120	103	4	343
ISONEW	2015-06-04	15:18:10	29	1	PP12P120	103	5	43
ISONEW	2015-06-04	15:18:10	54	2	PP12P120	103	6	19
ISONEW	2015-06-04	15:18:10	23	3	PP12P120	103	7	9
ISONEW	2015-06-04	15:18:10	40	4	PP12P120	103	8	358
ISONEW	2015-06-04	15:18:10	57	2	NOSTIM	104	1	0
ISONEW	2015-06-04	15:18:10	34	3	NOSTIM	104	2	0
ISONEW	2015-06-04	15:18:10	35	4	NOSTIM	104	3	9
ISONEW	2015-06-04	15:18:10	28	5	NOSTIM	104	4	3
ISONEW	2015-06-04	15:18:10	29	1	NOSTIM	104	5	0
ISONEW	2015-06-04	15:18:10	54	2	NOSTIM	104	6	0
ISONEW	2015-06-04	15:18:10	23	3	NOSTIM	104	7	0
ISONEW	2015-06-04	15:18:10	40	4	NOSTIM	104	8	0
ISONEW	2015-06-04	15:18:10	57	2	P120	105	1	191
ISONEW	2015-06-04	15:18:10	34	3	P120	105	2	9
ISONEW	2015-06-04	15:18:10	35	4	P120	105	3	85
ISONEW	2015-06-04	15:18:10	28	5	P120	105	4	858
ISONEW	2015-06-04	15:18:10	29	1	P120	105	5	661
ISONEW	2015-06-04	15:18:10	54	2	P120	105	6	134
ISONEW	2015-06-04	15:18:10	23	3	P120	105	7	226
ISONEW	2015-06-04	15:18:10	40	4	P120	105	8	540
ISONEW	2015-06-04	15:18:10	57	2	NOSTIM	106	1	0
ISONEW	2015-06-04	15:18:10	34	3	NOSTIM	106	2	23
ISONEW	2015-06-04	15:18:10	35	4	NOSTIM	106	3	0
ISONEW	2015-06-04	15:18:10	28	5	NOSTIM	106	4	5
ISONEW	2015-06-04	15:18:10	29	1	NOSTIM	106	5	0
ISONEW	2015-06-04	15:18:10	54	2	NOSTIM	106	6	0
ISONEW	2015-06-04	15:18:10	23	3	NOSTIM	106	7	0
ISONEW	2015-06-04	15:18:10	40	4	NOSTIM	106	8	1
ISONEW	2015-06-04	15:18:10	57	2	PP6P120	107	1	61
ISONEW	2015-06-04	15:18:10	34	3	PP6P120	107	2	11
ISONEW	2015-06-04	15:18:10	35	4	PP6P120	107	3	46
ISONEW	2015-06-04	15:18:10	28	5	PP6P120	107	4	913
ISONEW	2015-06-04	15:18:10	29	1	PP6P120	107	5	70
ISONEW	2015-06-04	15:18:10	54	2	PP6P120	107	6	19
ISONEW	2015-06-04	15:18:10	23	3	PP6P120	107	7	37
ISONEW	2015-06-04	15:18:10	40	4	PP6P120	107	8	319
ISONEW	2015-06-04	15:18:10	57	2	NOSTIM	108	1	0
ISONEW	2015-06-04	15:18:10	34	3	NOSTIM	108	2	0
ISONEW	2015-06-04	15:18:10	35	4	NOSTIM	108	3	4
ISONEW	2015-06-04	15:18:10	28	5	NOSTIM	108	4	0
ISONEW	2015-06-04	15:18:10	29	1	NOSTIM	108	5	0
ISONEW	2015-06-04	15:18:10	54	2	NOSTIM	108	6	0
ISONEW	2015-06-04	15:18:10	23	3	NOSTIM	108	7	0
ISONEW	2015-06-04	15:18:10	40	4	NOSTIM	108	8	9
ISONEW	2015-06-04	15:18:10	57	2	P120	109	1	212
ISONEW	2015-06-04	15:18:10	34	3	P120	109	2	169
ISONEW	2015-06-04	15:18:10	35	4	P120	109	3	58
ISONEW	2015-06-04	15:18:10	28	5	P120	109	4	655
ISONEW	2015-06-04	15:18:10	29	1	P120	109	5	630
ISONEW	2015-06-04	15:18:10	54	2	P120	109	6	220
ISONEW	2015-06-04	15:18:10	23	3	P120	109	7	233
ISONEW	2015-06-04	15:18:10	40	4	P120	109	8	656
ISONEW	2015-06-04	15:18:10	57	2	NOSTIM	110	1	0
ISONEW	2015-06-04	15:18:10	34	3	NOSTIM	110	2	0
ISONEW	2015-06-04	15:18:10	35	4	NOSTIM	110	3	0
ISONEW	2015-06-04	15:18:10	28	5	NOSTIM	110	4	2
ISONEW	2015-06-04	15:18:10	29	1	NOSTIM	110	5	0
ISONEW	2015-06-04	15:18:10	54	2	NOSTIM	110	6	0
ISONEW	2015-06-04	15:18:10	23	3	NOSTIM	110	7	0
ISONEW	2015-06-04	15:18:10	40	4	NOSTIM	110	8	0
ISONEW	2015-06-04	15:18:10	57	2	P120	111	1	325
ISONEW	2015-06-04	15:18:10	34	3	P120	111	2	56
ISONEW	2015-06-04	15:18:10	35	4	P120	111	3	28
ISONEW	2015-06-04	15:18:10	28	5	P120	111	4	331
ISONEW	2015-06-04	15:18:10	29	1	P120	111	5	591
ISONEW	2015-06-04	15:18:10	54	2	P120	111	6	104
ISONEW	2015-06-04	15:18:10	23	3	P120	111	7	121
ISONEW	2015-06-04	15:18:10	40	4	P120	111	8	561
ISONEW	2015-06-04	15:18:10	57	2	NOSTIM	112	1	0
ISONEW	2015-06-04	15:18:10	34	3	NOSTIM	112	2	0
ISONEW	2015-06-04	15:18:10	35	4	NOSTIM	112	3	3
ISONEW	2015-06-04	15:18:10	28	5	NOSTIM	112	4	2
ISONEW	2015-06-04	15:18:10	29	1	NOSTIM	112	5	0
ISONEW	2015-06-04	15:18:10	54	2	NOSTIM	112	6	0
ISONEW	2015-06-04	15:18:10	23	3	NOSTIM	112	7	0
ISONEW	2015-06-04	15:18:10	40	4	NOSTIM	112	8	0
ISONEW	2015-06-04	15:18:10	57	2	P120	113	1	260
ISONEW	2015-06-04	15:18:10	34	3	P120	113	2	35
ISONEW	2015-06-04	15:18:10	35	4	P120	113	3	172
ISONEW	2015-06-04	15:18:10	28	5	P120	113	4	414
ISONEW	2015-06-04	15:18:10	29	1	P120	113	5	293
ISONEW	2015-06-04	15:18:10	54	2	P120	113	6	166
ISONEW	2015-06-04	15:18:10	23	3	P120	113	7	223
ISONEW	2015-06-04	15:18:10	40	4	P120	113	8	453
ISONEW	2015-06-04	15:18:10	57	2	NOSTIM	114	1	0
ISONEW	2015-06-04	15:18:10	34	3	NOSTIM	114	2	0
ISONEW	2015-06-04	15:18:10	35	4	NOSTIM	114	3	2
ISONEW	2015-06-04	15:18:10	28	5	NOSTIM	114	4	3
ISONEW	2015-06-04	15:18:10	29	1	NOSTIM	114	5	0
ISONEW	2015-06-04	15:18:10	54	2	NOSTIM	114	6	0
ISONEW	2015-06-04	15:18:10	23	3	NOSTIM	114	7	0
ISONEW	2015-06-04	15:18:10	40	4	NOSTIM	114	8	0
ISONEW	2015-06-04	15:18:10	57	2	P120	115	1	227
ISONEW	2015-06-04	15:18:10	34	3	P120	115	2	32
ISONEW	2015-06-04	15:18:10	35	4	P120	115	3	33
ISONEW	2015-06-04	15:18:10	28	5	P120	115	4	247
ISONEW	2015-06-04	15:18:10	29	1	P120	115	5	254
ISONEW	2015-06-04	15:18:10	54	2	P120	115	6	346
ISONEW	2015-06-04	15:18:10	23	3	P120	115	7	56
ISONEW	2015-06-04	15:18:10	40	4	P120	115	8	235
ISONEW	2015-06-04	15:18:10	57	2	NOSTIM	116	1	0
ISONEW	2015-06-04	15:18:10	34	3	NOSTIM	116	2	0
ISONEW	2015-06-04	15:18:10	35	4	NOSTIM	116	3	0
ISONEW	2015-06-04	15:18:10	28	5	NOSTIM	116	4	5
ISONEW	2015-06-04	15:18:10	29	1	NOSTIM	116	5	5
ISONEW	2015-06-04	15:18:10	54	2	NOSTIM	116	6	0
ISONEW	2015-06-04	15:18:10	23	3	NOSTIM	116	7	0
ISONEW	2015-06-04	15:18:10	40	4	NOSTIM	116	8	0
ISONEW	2015-06-04	15:18:10	57	2	P120	117	1	310
ISONEW	2015-06-04	15:18:10	34	3	P120	117	2	178
ISONEW	2015-06-04	15:18:10	35	4	P120	117	3	302
ISONEW	2015-06-04	15:18:10	28	5	P120	117	4	695
ISONEW	2015-06-04	15:18:10	29	1	P120	117	5	342
ISONEW	2015-06-04	15:18:10	54	2	P120	117	6	512
ISONEW	2015-06-04	15:18:10	23	3	P120	117	7	673
ISONEW	2015-06-04	15:18:10	40	4	P120	117	8	165
ISONEW	2015-06-04	15:18:10	57	2	NOSTIM	118	1	0
ISONEW	2015-06-04	15:18:10	34	3	NOSTIM	118	2	0
ISONEW	2015-06-04	15:18:10	35	4	NOSTIM	118	3	0
ISONEW	2015-06-04	15:18:10	28	5	NOSTIM	118	4	0
ISONEW	2015-06-04	15:18:10	29	1	NOSTIM	118	5	0
ISONEW	2015-06-04	15:18:10	54	2	NOSTIM	118	6	0
ISONEW	2015-06-04	15:18:10	23	3	NOSTIM	118	7	0
ISONEW	2015-06-04	15:18:10	40	4	NOSTIM	118	8	0
ISONEW	2015-06-04	15:18:10	57	2	P120	119	1	256
ISONEW	2015-06-04	15:18:10	34	3	P120	119	2	19
ISONEW	2015-06-04	15:18:10	35	4	P120	119	3	274
ISONEW	2015-06-04	15:18:10	28	5	P120	119	4	678
ISONEW	2015-06-04	15:18:10	29	1	P120	119	5	235
ISONEW	2015-06-04	15:18:10	54	2	P120	119	6	170
ISONEW	2015-06-04	15:18:10	23	3	P120	119	7	79
ISONEW	2015-06-04	15:18:10	40	4	P120	119	8	497
ISONEW	2015-06-04	15:18:10	57	2	NOSTIM	120	1	0
ISONEW	2015-06-04	15:18:10	34	3	NOSTIM	120	2	0
ISONEW	2015-06-04	15:18:10	35	4	NOSTIM	120	3	4
ISONEW	2015-06-04	15:18:10	28	5	NOSTIM	120	4	2
ISONEW	2015-06-04	15:18:10	29	1	NOSTIM	120	5	2
ISONEW	2015-06-04	15:18:10	54	2	NOSTIM	120	6	0
ISONEW	2015-06-04	15:18:10	23	3	NOSTIM	120	7	0
ISONEW	2015-06-04	15:18:10	40	4	NOSTIM	120	8	0
ISONEW	2015-06-04	16:05:15	32	3	P120	1	1	523
ISONEW	2015-06-04	16:05:15	26	4	P120	1	2	1707
ISONEW	2015-06-04	16:05:15	3	5	P120	1	3	766
ISONEW	2015-06-04	16:05:15	20	1	P120	1	4	953
ISONEW	2015-06-04	16:05:15	37	2	P120	1	5	540
ISONEW	2015-06-04	16:05:15	30	3	P120	1	6	559
ISONEW	2015-06-04	16:05:15	39	4	P120	1	7	458
ISONEW	2015-06-04	16:05:15	16	5	P120	1	8	422
ISONEW	2015-06-04	16:05:15	32	3	NOSTIM	2	1	0
ISONEW	2015-06-04	16:05:15	26	4	NOSTIM	2	2	0
ISONEW	2015-06-04	16:05:15	3	5	NOSTIM	2	3	0
ISONEW	2015-06-04	16:05:15	20	1	NOSTIM	2	4	0
ISONEW	2015-06-04	16:05:15	37	2	NOSTIM	2	5	0
ISONEW	2015-06-04	16:05:15	30	3	NOSTIM	2	6	0
ISONEW	2015-06-04	16:05:15	39	4	NOSTIM	2	7	0
ISONEW	2015-06-04	16:05:15	16	5	NOSTIM	2	8	1
ISONEW	2015-06-04	16:05:15	32	3	P120	3	1	1289
ISONEW	2015-06-04	16:05:15	26	4	P120	3	2	1400
ISONEW	2015-06-04	16:05:15	3	5	P120	3	3	887
ISONEW	2015-06-04	16:05:15	20	1	P120	3	4	1986
ISONEW	2015-06-04	16:05:15	37	2	P120	3	5	170
ISONEW	2015-06-04	16:05:15	30	3	P120	3	6	1144
ISONEW	2015-06-04	16:05:15	39	4	P120	3	7	716
ISONEW	2015-06-04	16:05:15	16	5	P120	3	8	534
ISONEW	2015-06-04	16:05:15	32	3	NOSTIM	4	1	0
ISONEW	2015-06-04	16:05:15	26	4	NOSTIM	4	2	0
ISONEW	2015-06-04	16:05:15	3	5	NOSTIM	4	3	7
ISONEW	2015-06-04	16:05:15	20	1	NOSTIM	4	4	0
ISONEW	2015-06-04	16:05:15	37	2	NOSTIM	4	5	0
ISONEW	2015-06-04	16:05:15	30	3	NOSTIM	4	6	0
ISONEW	2015-06-04	16:05:15	39	4	NOSTIM	4	7	0
ISONEW	2015-06-04	16:05:15	16	5	NOSTIM	4	8	1
ISONEW	2015-06-04	16:05:15	32	3	P120	5	1	1637
ISONEW	2015-06-04	16:05:15	26	4	P120	5	2	1264
ISONEW	2015-06-04	16:05:15	3	5	P120	5	3	606
ISONEW	2015-06-04	16:05:15	20	1	P120	5	4	394
ISONEW	2015-06-04	16:05:15	37	2	P120	5	5	275
ISONEW	2015-06-04	16:05:15	30	3	P120	5	6	1152
ISONEW	2015-06-04	16:05:15	39	4	P120	5	7	204
ISONEW	2015-06-04	16:05:15	16	5	P120	5	8	319
ISONEW	2015-06-04	16:05:15	32	3	NOSTIM	6	1	0
ISONEW	2015-06-04	16:05:15	26	4	NOSTIM	6	2	0
ISONEW	2015-06-04	16:05:15	3	5	NOSTIM	6	3	0
ISONEW	2015-06-04	16:05:15	20	1	NOSTIM	6	4	0
ISONEW	2015-06-04	16:05:15	37	2	NOSTIM	6	5	0
ISONEW	2015-06-04	16:05:15	30	3	NOSTIM	6	6	0
ISONEW	2015-06-04	16:05:15	39	4	NOSTIM	6	7	0
ISONEW	2015-06-04	16:05:15	16	5	NOSTIM	6	8	0
ISONEW	2015-06-04	16:05:15	32	3	P120	7	1	1565
ISONEW	2015-06-04	16:05:15	26	4	P120	7	2	504
ISONEW	2015-06-04	16:05:15	3	5	P120	7	3	863
ISONEW	2015-06-04	16:05:15	20	1	P120	7	4	1593
ISONEW	2015-06-04	16:05:15	37	2	P120	7	5	1048
ISONEW	2015-06-04	16:05:15	30	3	P120	7	6	1525
ISONEW	2015-06-04	16:05:15	39	4	P120	7	7	435
ISONEW	2015-06-04	16:05:15	16	5	P120	7	8	652
ISONEW	2015-06-04	16:05:15	32	3	NOSTIM	8	1	0
ISONEW	2015-06-04	16:05:15	26	4	NOSTIM	8	2	4
ISONEW	2015-06-04	16:05:15	3	5	NOSTIM	8	3	1
ISONEW	2015-06-04	16:05:15	20	1	NOSTIM	8	4	0
ISONEW	2015-06-04	16:05:15	37	2	NOSTIM	8	5	0
ISONEW	2015-06-04	16:05:15	30	3	NOSTIM	8	6	0
ISONEW	2015-06-04	16:05:15	39	4	NOSTIM	8	7	0
ISONEW	2015-06-04	16:05:15	16	5	NOSTIM	8	8	4
ISONEW	2015-06-04	16:05:15	32	3	P120	9	1	431
ISONEW	2015-06-04	16:05:15	26	4	P120	9	2	238
ISONEW	2015-06-04	16:05:15	3	5	P120	9	3	672
ISONEW	2015-06-04	16:05:15	20	1	P120	9	4	243
ISONEW	2015-06-04	16:05:15	37	2	P120	9	5	1253
ISONEW	2015-06-04	16:05:15	30	3	P120	9	6	1215
ISONEW	2015-06-04	16:05:15	39	4	P120	9	7	221
ISONEW	2015-06-04	16:05:15	16	5	P120	9	8	472
ISONEW	2015-06-04	16:05:15	32	3	NOSTIM	10	1	0
ISONEW	2015-06-04	16:05:15	26	4	NOSTIM	10	2	0
ISONEW	2015-06-04	16:05:15	3	5	NOSTIM	10	3	0
ISONEW	2015-06-04	16:05:15	20	1	NOSTIM	10	4	0
ISONEW	2015-06-04	16:05:15	37	2	NOSTIM	10	5	0
ISONEW	2015-06-04	16:05:15	30	3	NOSTIM	10	6	0
ISONEW	2015-06-04	16:05:15	39	4	NOSTIM	10	7	0
[truncated: 5,681 more rows]

## Sheet: s768ecmb
Session	Date	Time	Subject	Grp	Trial Type	Trial #	Box	Startle
ISONEW	2015-06-12	11:55:20	49	1	P120	1	1	976
ISONEW	2015-06-12	11:55:20	50	2	P120	1	2	109
ISONEW	2015-06-12	11:55:20	43	1	P120	1	3	662
ISONEW	2015-06-12	11:55:20	20	2	P120	1	4	226
ISONEW	2015-06-12	11:55:20	37	1	P120	1	5	1279
ISONEW	2015-06-12	11:55:20	46	2	P120	1	6	69
ISONEW	2015-06-12	11:55:20	7	1	P120	1	7	325
ISONEW	2015-06-12	11:55:20	33	2	P120	1	8	118
ISONEW	2015-06-12	11:55:20	49	1	NOSTIM	2	1	0
ISONEW	2015-06-12	11:55:20	50	2	NOSTIM	2	2	0
ISONEW	2015-06-12	11:55:20	43	1	NOSTIM	2	3	0
ISONEW	2015-06-12	11:55:20	20	2	NOSTIM	2	4	0
ISONEW	2015-06-12	11:55:20	37	1	NOSTIM	2	5	1
ISONEW	2015-06-12	11:55:20	46	2	NOSTIM	2	6	0
ISONEW	2015-06-12	11:55:20	7	1	NOSTIM	2	7	0
ISONEW	2015-06-12	11:55:20	33	2	NOSTIM	2	8	0
ISONEW	2015-06-12	11:55:20	49	1	P120	3	1	537
ISONEW	2015-06-12	11:55:20	50	2	P120	3	2	223
ISONEW	2015-06-12	11:55:20	43	1	P120	3	3	598
ISONEW	2015-06-12	11:55:20	20	2	P120	3	4	292
ISONEW	2015-06-12	11:55:20	37	1	P120	3	5	435
ISONEW	2015-06-12	11:55:20	46	2	P120	3	6	45
ISONEW	2015-06-12	11:55:20	7	1	P120	3	7	197
ISONEW	2015-06-12	11:55:20	33	2	P120	3	8	54
ISONEW	2015-06-12	11:55:20	49	1	NOSTIM	4	1	0
ISONEW	2015-06-12	11:55:20	50	2	NOSTIM	4	2	0
ISONEW	2015-06-12	11:55:20	43	1	NOSTIM	4	3	0
ISONEW	2015-06-12	11:55:20	20	2	NOSTIM	4	4	0
ISONEW	2015-06-12	11:55:20	37	1	NOSTIM	4	5	0
ISONEW	2015-06-12	11:55:20	46	2	NOSTIM	4	6	0
ISONEW	2015-06-12	11:55:20	7	1	NOSTIM	4	7	0
ISONEW	2015-06-12	11:55:20	33	2	NOSTIM	4	8	0
ISONEW	2015-06-12	11:55:20	49	1	P120	5	1	223
ISONEW	2015-06-12	11:55:20	50	2	P120	5	2	200
ISONEW	2015-06-12	11:55:20	43	1	P120	5	3	579
ISONEW	2015-06-12	11:55:20	20	2	P120	5	4	198
ISONEW	2015-06-12	11:55:20	37	1	P120	5	5	376
ISONEW	2015-06-12	11:55:20	46	2	P120	5	6	101
ISONEW	2015-06-12	11:55:20	7	1	P120	5	7	137
ISONEW	2015-06-12	11:55:20	33	2	P120	5	8	86
ISONEW	2015-06-12	11:55:20	49	1	NOSTIM	6	1	0
ISONEW	2015-06-12	11:55:20	50	2	NOSTIM	6	2	0
ISONEW	2015-06-12	11:55:20	43	1	NOSTIM	6	3	0
ISONEW	2015-06-12	11:55:20	20	2	NOSTIM	6	4	0
ISONEW	2015-06-12	11:55:20	37	1	NOSTIM	6	5	0
ISONEW	2015-06-12	11:55:20	46	2	NOSTIM	6	6	0
ISONEW	2015-06-12	11:55:20	7	1	NOSTIM	6	7	0
ISONEW	2015-06-12	11:55:20	33	2	NOSTIM	6	8	0
ISONEW	2015-06-12	11:55:20	49	1	P120	7	1	307
ISONEW	2015-06-12	11:55:20	50	2	P120	7	2	252
ISONEW	2015-06-12	11:55:20	43	1	P120	7	3	828
ISONEW	2015-06-12	11:55:20	20	2	P120	7	4	73
ISONEW	2015-06-12	11:55:20	37	1	P120	7	5	1110
ISONEW	2015-06-12	11:55:20	46	2	P120	7	6	48
ISONEW	2015-06-12	11:55:20	7	1	P120	7	7	189
ISONEW	2015-06-12	11:55:20	33	2	P120	7	8	64
ISONEW	2015-06-12	11:55:20	49	1	NOSTIM	8	1	0
ISONEW	2015-06-12	11:55:20	50	2	NOSTIM	8	2	0
ISONEW	2015-06-12	11:55:20	43	1	NOSTIM	8	3	0
ISONEW	2015-06-12	11:55:20	20	2	NOSTIM	8	4	0
ISONEW	2015-06-12	11:55:20	37	1	NOSTIM	8	5	0
ISONEW	2015-06-12	11:55:20	46	2	NOSTIM	8	6	0
ISONEW	2015-06-12	11:55:20	7	1	NOSTIM	8	7	0
ISONEW	2015-06-12	11:55:20	33	2	NOSTIM	8	8	0
ISONEW	2015-06-12	11:55:20	49	1	P120	9	1	44
ISONEW	2015-06-12	11:55:20	50	2	P120	9	2	197
ISONEW	2015-06-12	11:55:20	43	1	P120	9	3	128
ISONEW	2015-06-12	11:55:20	20	2	P120	9	4	136
ISONEW	2015-06-12	11:55:20	37	1	P120	9	5	1309
ISONEW	2015-06-12	11:55:20	46	2	P120	9	6	60
ISONEW	2015-06-12	11:55:20	7	1	P120	9	7	265
ISONEW	2015-06-12	11:55:20	33	2	P120	9	8	31
ISONEW	2015-06-12	11:55:20	49	1	NOSTIM	10	1	0
ISONEW	2015-06-12	11:55:20	50	2	NOSTIM	10	2	0
ISONEW	2015-06-12	11:55:20	43	1	NOSTIM	10	3	0
ISONEW	2015-06-12	11:55:20	20	2	NOSTIM	10	4	0
ISONEW	2015-06-12	11:55:20	37	1	NOSTIM	10	5	0
ISONEW	2015-06-12	11:55:20	46	2	NOSTIM	10	6	0
ISONEW	2015-06-12	11:55:20	7	1	NOSTIM	10	7	0
ISONEW	2015-06-12	11:55:20	33	2	NOSTIM	10	8	0
ISONEW	2015-06-12	11:55:20	49	1	P120	11	1	49
ISONEW	2015-06-12	11:55:20	50	2	P120	11	2	143
ISONEW	2015-06-12	11:55:20	43	1	P120	11	3	44
ISONEW	2015-06-12	11:55:20	20	2	P120	11	4	246
ISONEW	2015-06-12	11:55:20	37	1	P120	11	5	334
ISONEW	2015-06-12	11:55:20	46	2	P120	11	6	44
ISONEW	2015-06-12	11:55:20	7	1	P120	11	7	330
ISONEW	2015-06-12	11:55:20	33	2	P120	11	8	23
ISONEW	2015-06-12	11:55:20	49	1	NOSTIM	12	1	0
ISONEW	2015-06-12	11:55:20	50	2	NOSTIM	12	2	0
ISONEW	2015-06-12	11:55:20	43	1	NOSTIM	12	3	0
ISONEW	2015-06-12	11:55:20	20	2	NOSTIM	12	4	0
ISONEW	2015-06-12	11:55:20	37	1	NOSTIM	12	5	0
ISONEW	2015-06-12	11:55:20	46	2	NOSTIM	12	6	0
ISONEW	2015-06-12	11:55:20	7	1	NOSTIM	12	7	0
ISONEW	2015-06-12	11:55:20	33	2	NOSTIM	12	8	0
ISONEW	2015-06-12	11:55:20	49	1	PP6P120	13	1	3
ISONEW	2015-06-12	11:55:20	50	2	PP6P120	13	2	85
ISONEW	2015-06-12	11:55:20	43	1	PP6P120	13	3	51
ISONEW	2015-06-12	11:55:20	20	2	PP6P120	13	4	332
ISONEW	2015-06-12	11:55:20	37	1	PP6P120	13	5	172
ISONEW	2015-06-12	11:55:20	46	2	PP6P120	13	6	33
ISONEW	2015-06-12	11:55:20	7	1	PP6P120	13	7	3
ISONEW	2015-06-12	11:55:20	33	2	PP6P120	13	8	91
ISONEW	2015-06-12	11:55:20	49	1	NOSTIM	14	1	0
ISONEW	2015-06-12	11:55:20	50	2	NOSTIM	14	2	0
ISONEW	2015-06-12	11:55:20	43	1	NOSTIM	14	3	1
ISONEW	2015-06-12	11:55:20	20	2	NOSTIM	14	4	0
ISONEW	2015-06-12	11:55:20	37	1	NOSTIM	14	5	0
ISONEW	2015-06-12	11:55:20	46	2	NOSTIM	14	6	0
ISONEW	2015-06-12	11:55:20	7	1	NOSTIM	14	7	0
ISONEW	2015-06-12	11:55:20	33	2	NOSTIM	14	8	0
ISONEW	2015-06-12	11:55:20	49	1	PP12P120	15	1	2
ISONEW	2015-06-12	11:55:20	50	2	PP12P120	15	2	8
ISONEW	2015-06-12	11:55:20	43	1	PP12P120	15	3	12
ISONEW	2015-06-12	11:55:20	20	2	PP12P120	15	4	131
ISONEW	2015-06-12	11:55:20	37	1	PP12P120	15	5	17
ISONEW	2015-06-12	11:55:20	46	2	PP12P120	15	6	7
ISONEW	2015-06-12	11:55:20	7	1	PP12P120	15	7	2
ISONEW	2015-06-12	11:55:20	33	2	PP12P120	15	8	16
ISONEW	2015-06-12	11:55:20	49	1	NOSTIM	16	1	0
ISONEW	2015-06-12	11:55:20	50	2	NOSTIM	16	2	0
ISONEW	2015-06-12	11:55:20	43	1	NOSTIM	16	3	0
ISONEW	2015-06-12	11:55:20	20	2	NOSTIM	16	4	5
ISONEW	2015-06-12	11:55:20	37	1	NOSTIM	16	5	0
ISONEW	2015-06-12	11:55:20	46	2	NOSTIM	16	6	0
ISONEW	2015-06-12	11:55:20	7	1	NOSTIM	16	7	0
ISONEW	2015-06-12	11:55:20	33	2	NOSTIM	16	8	0
ISONEW	2015-06-12	11:55:20	49	1	PP3P120	17	1	94
ISONEW	2015-06-12	11:55:20	50	2	PP3P120	17	2	110
ISONEW	2015-06-12	11:55:20	43	1	PP3P120	17	3	22
ISONEW	2015-06-12	11:55:20	20	2	PP3P120	17	4	178
ISONEW	2015-06-12	11:55:20	37	1	PP3P120	17	5	70
ISONEW	2015-06-12	11:55:20	46	2	PP3P120	17	6	50
ISONEW	2015-06-12	11:55:20	7	1	PP3P120	17	7	13
ISONEW	2015-06-12	11:55:20	33	2	PP3P120	17	8	45
ISONEW	2015-06-12	11:55:20	49	1	NOSTIM	18	1	0
ISONEW	2015-06-12	11:55:20	50	2	NOSTIM	18	2	0
ISONEW	2015-06-12	11:55:20	43	1	NOSTIM	18	3	0
ISONEW	2015-06-12	11:55:20	20	2	NOSTIM	18	4	2
ISONEW	2015-06-12	11:55:20	37	1	NOSTIM	18	5	0
ISONEW	2015-06-12	11:55:20	46	2	NOSTIM	18	6	0
ISONEW	2015-06-12	11:55:20	7	1	NOSTIM	18	7	0
ISONEW	2015-06-12	11:55:20	33	2	NOSTIM	18	8	0
ISONEW	2015-06-12	11:55:20	49	1	P120	19	1	524
ISONEW	2015-06-12	11:55:20	50	2	P120	19	2	161
ISONEW	2015-06-12	11:55:20	43	1	P120	19	3	135
ISONEW	2015-06-12	11:55:20	20	2	P120	19	4	124
ISONEW	2015-06-12	11:55:20	37	1	P120	19	5	187
ISONEW	2015-06-12	11:55:20	46	2	P120	19	6	56
ISONEW	2015-06-12	11:55:20	7	1	P120	19	7	161
ISONEW	2015-06-12	11:55:20	33	2	P120	19	8	13
ISONEW	2015-06-12	11:55:20	49	1	NOSTIM	20	1	0
ISONEW	2015-06-12	11:55:20	50	2	NOSTIM	20	2	0
ISONEW	2015-06-12	11:55:20	43	1	NOSTIM	20	3	0
ISONEW	2015-06-12	11:55:20	20	2	NOSTIM	20	4	1
ISONEW	2015-06-12	11:55:20	37	1	NOSTIM	20	5	0
ISONEW	2015-06-12	11:55:20	46	2	NOSTIM	20	6	0
ISONEW	2015-06-12	11:55:20	7	1	NOSTIM	20	7	0
ISONEW	2015-06-12	11:55:20	33	2	NOSTIM	20	8	0
ISONEW	2015-06-12	11:55:20	49	1	PP6P120	21	1	0
ISONEW	2015-06-12	11:55:20	50	2	PP6P120	21	2	48
ISONEW	2015-06-12	11:55:20	43	1	PP6P120	21	3	1
ISONEW	2015-06-12	11:55:20	20	2	PP6P120	21	4	161
ISONEW	2015-06-12	11:55:20	37	1	PP6P120	21	5	60
ISONEW	2015-06-12	11:55:20	46	2	PP6P120	21	6	4
ISONEW	2015-06-12	11:55:20	7	1	PP6P120	21	7	2
ISONEW	2015-06-12	11:55:20	33	2	PP6P120	21	8	25
ISONEW	2015-06-12	11:55:20	49	1	NOSTIM	22	1	0
ISONEW	2015-06-12	11:55:20	50	2	NOSTIM	22	2	0
ISONEW	2015-06-12	11:55:20	43	1	NOSTIM	22	3	0
ISONEW	2015-06-12	11:55:20	20	2	NOSTIM	22	4	0
ISONEW	2015-06-12	11:55:20	37	1	NOSTIM	22	5	0
ISONEW	2015-06-12	11:55:20	46	2	NOSTIM	22	6	0
ISONEW	2015-06-12	11:55:20	7	1	NOSTIM	22	7	0
ISONEW	2015-06-12	11:55:20	33	2	NOSTIM	22	8	0
ISONEW	2015-06-12	11:55:20	49	1	PP3P120	23	1	53
ISONEW	2015-06-12	11:55:20	50	2	PP3P120	23	2	116
ISONEW	2015-06-12	11:55:20	43	1	PP3P120	23	3	5
ISONEW	2015-06-12	11:55:20	20	2	PP3P120	23	4	86
ISONEW	2015-06-12	11:55:20	37	1	PP3P120	23	5	333
ISONEW	2015-06-12	11:55:20	46	2	PP3P120	23	6	8
ISONEW	2015-06-12	11:55:20	7	1	PP3P120	23	7	49
ISONEW	2015-06-12	11:55:20	33	2	PP3P120	23	8	12
ISONEW	2015-06-12	11:55:20	49	1	NOSTIM	24	1	0
ISONEW	2015-06-12	11:55:20	50	2	NOSTIM	24	2	0
ISONEW	2015-06-12	11:55:20	43	1	NOSTIM	24	3	0
ISONEW	2015-06-12	11:55:20	20	2	NOSTIM	24	4	0
ISONEW	2015-06-12	11:55:20	37	1	NOSTIM	24	5	0
ISONEW	2015-06-12	11:55:20	46	2	NOSTIM	24	6	0
ISONEW	2015-06-12	11:55:20	7	1	NOSTIM	24	7	0
ISONEW	2015-06-12	11:55:20	33	2	NOSTIM	24	8	0
ISONEW	2015-06-12	11:55:20	49	1	PP6P120	25	1	10
ISONEW	2015-06-12	11:55:20	50	2	PP6P120	25	2	47
ISONEW	2015-06-12	11:55:20	43	1	PP6P120	25	3	13
ISONEW	2015-06-12	11:55:20	20	2	PP6P120	25	4	87
ISONEW	2015-06-12	11:55:20	37	1	PP6P120	25	5	62
ISONEW	2015-06-12	11:55:20	46	2	PP6P120	25	6	8
ISONEW	2015-06-12	11:55:20	7	1	PP6P120	25	7	4
ISONEW	2015-06-12	11:55:20	33	2	PP6P120	25	8	13
ISONEW	2015-06-12	11:55:20	49	1	NOSTIM	26	1	0
ISONEW	2015-06-12	11:55:20	50	2	NOSTIM	26	2	0
ISONEW	2015-06-12	11:55:20	43	1	NOSTIM	26	3	0
ISONEW	2015-06-12	11:55:20	20	2	NOSTIM	26	4	0
ISONEW	2015-06-12	11:55:20	37	1	NOSTIM	26	5	0
ISONEW	2015-06-12	11:55:20	46	2	NOSTIM	26	6	0
ISONEW	2015-06-12	11:55:20	7	1	NOSTIM	26	7	0
ISONEW	2015-06-12	11:55:20	33	2	NOSTIM	26	8	0
ISONEW	2015-06-12	11:55:20	49	1	P120	27	1	227
ISONEW	2015-06-12	11:55:20	50	2	P120	27	2	143
ISONEW	2015-06-12	11:55:20	43	1	P120	27	3	178
ISONEW	2015-06-12	11:55:20	20	2	P120	27	4	255
ISONEW	2015-06-12	11:55:20	37	1	P120	27	5	55
ISONEW	2015-06-12	11:55:20	46	2	P120	27	6	10
ISONEW	2015-06-12	11:55:20	7	1	P120	27	7	27
ISONEW	2015-06-12	11:55:20	33	2	P120	27	8	16
ISONEW	2015-06-12	11:55:20	49	1	NOSTIM	28	1	0
ISONEW	2015-06-12	11:55:20	50	2	NOSTIM	28	2	0
ISONEW	2015-06-12	11:55:20	43	1	NOSTIM	28	3	0
ISONEW	2015-06-12	11:55:20	20	2	NOSTIM	28	4	0
ISONEW	2015-06-12	11:55:20	37	1	NOSTIM	28	5	0
ISONEW	2015-06-12	11:55:20	46	2	NOSTIM	28	6	0
ISONEW	2015-06-12	11:55:20	7	1	NOSTIM	28	7	0
ISONEW	2015-06-12	11:55:20	33	2	NOSTIM	28	8	0
ISONEW	2015-06-12	11:55:20	49	1	PP12P120	29	1	5
ISONEW	2015-06-12	11:55:20	50	2	PP12P120	29	2	23
ISONEW	2015-06-12	11:55:20	43	1	PP12P120	29	3	3
ISONEW	2015-06-12	11:55:20	20	2	PP12P120	29	4	43
ISONEW	2015-06-12	11:55:20	37	1	PP12P120	29	5	13
ISONEW	2015-06-12	11:55:20	46	2	PP12P120	29	6	2
ISONEW	2015-06-12	11:55:20	7	1	PP12P120	29	7	51
ISONEW	2015-06-12	11:55:20	33	2	PP12P120	29	8	1
ISONEW	2015-06-12	11:55:20	49	1	NOSTIM	30	1	0
ISONEW	2015-06-12	11:55:20	50	2	NOSTIM	30	2	0
ISONEW	2015-06-12	11:55:20	43	1	NOSTIM	30	3	0
ISONEW	2015-06-12	11:55:20	20	2	NOSTIM	30	4	1
ISONEW	2015-06-12	11:55:20	37	1	NOSTIM	30	5	0
ISONEW	2015-06-12	11:55:20	46	2	NOSTIM	30	6	0
ISONEW	2015-06-12	11:55:20	7	1	NOSTIM	30	7	0
ISONEW	2015-06-12	11:55:20	33	2	NOSTIM	30	8	0
ISONEW	2015-06-12	11:55:20	49	1	P120	31	1	79
ISONEW	2015-06-12	11:55:20	50	2	P120	31	2	267
ISONEW	2015-06-12	11:55:20	43	1	P120	31	3	44
ISONEW	2015-06-12	11:55:20	20	2	P120	31	4	80
ISONEW	2015-06-12	11:55:20	37	1	P120	31	5	274
ISONEW	2015-06-12	11:55:20	46	2	P120	31	6	16
ISONEW	2015-06-12	11:55:20	7	1	P120	31	7	71
ISONEW	2015-06-12	11:55:20	33	2	P120	31	8	6
ISONEW	2015-06-12	11:55:20	49	1	NOSTIM	32	1	0
ISONEW	2015-06-12	11:55:20	50	2	NOSTIM	32	2	0
ISONEW	2015-06-12	11:55:20	43	1	NOSTIM	32	3	0
ISONEW	2015-06-12	11:55:20	20	2	NOSTIM	32	4	3
ISONEW	2015-06-12	11:55:20	37	1	NOSTIM	32	5	0
ISONEW	2015-06-12	11:55:20	46	2	NOSTIM	32	6	0
ISONEW	2015-06-12	11:55:20	7	1	NOSTIM	32	7	0
ISONEW	2015-06-12	11:55:20	33	2	NOSTIM	32	8	0
ISONEW	2015-06-12	11:55:20	49	1	PP3P120	33	1	51
ISONEW	2015-06-12	11:55:20	50	2	PP3P120	33	2	136
ISONEW	2015-06-12	11:55:20	43	1	PP3P120	33	3	68
ISONEW	2015-06-12	11:55:20	20	2	PP3P120	33	4	359
ISONEW	2015-06-12	11:55:20	37	1	PP3P120	33	5	42
ISONEW	2015-06-12	11:55:20	46	2	PP3P120	33	6	4
ISONEW	2015-06-12	11:55:20	7	1	PP3P120	33	7	16
ISONEW	2015-06-12	11:55:20	33	2	PP3P120	33	8	34
ISONEW	2015-06-12	11:55:20	49	1	NOSTIM	34	1	0
ISONEW	2015-06-12	11:55:20	50	2	NOSTIM	34	2	0
ISONEW	2015-06-12	11:55:20	43	1	NOSTIM	34	3	0
ISONEW	2015-06-12	11:55:20	20	2	NOSTIM	34	4	2
ISONEW	2015-06-12	11:55:20	37	1	NOSTIM	34	5	0
ISONEW	2015-06-12	11:55:20	46	2	NOSTIM	34	6	0
ISONEW	2015-06-12	11:55:20	7	1	NOSTIM	34	7	0
ISONEW	2015-06-12	11:55:20	33	2	NOSTIM	34	8	0
ISONEW	2015-06-12	11:55:20	49	1	PP12P120	35	1	1
ISONEW	2015-06-12	11:55:20	50	2	PP12P120	35	2	22
ISONEW	2015-06-12	11:55:20	43	1	PP12P120	35	3	23
ISONEW	2015-06-12	11:55:20	20	2	PP12P120	35	4	39
ISONEW	2015-06-12	11:55:20	37	1	PP12P120	35	5	66
ISONEW	2015-06-12	11:55:20	46	2	PP12P120	35	6	42
ISONEW	2015-06-12	11:55:20	7	1	PP12P120	35	7	4
ISONEW	2015-06-12	11:55:20	33	2	PP12P120	35	8	0
ISONEW	2015-06-12	11:55:20	49	1	NOSTIM	36	1	0
ISONEW	2015-06-12	11:55:20	50	2	NOSTIM	36	2	0
ISONEW	2015-06-12	11:55:20	43	1	NOSTIM	36	3	0
ISONEW	2015-06-12	11:55:20	20	2	NOSTIM	36	4	0
ISONEW	2015-06-12	11:55:20	37	1	NOSTIM	36	5	2
ISONEW	2015-06-12	11:55:20	46	2	NOSTIM	36	6	0
ISONEW	2015-06-12	11:55:20	7	1	NOSTIM	36	7	0
ISONEW	2015-06-12	11:55:20	33	2	NOSTIM	36	8	0
ISONEW	2015-06-12	11:55:20	49	1	PP3P120	37	1	6
ISONEW	2015-06-12	11:55:20	50	2	PP3P120	37	2	160
ISONEW	2015-06-12	11:55:20	43	1	PP3P120	37	3	5
ISONEW	2015-06-12	11:55:20	20	2	PP3P120	37	4	44
ISONEW	2015-06-12	11:55:20	37	1	PP3P120	37	5	126
ISONEW	2015-06-12	11:55:20	46	2	PP3P120	37	6	15
ISONEW	2015-06-12	11:55:20	7	1	PP3P120	37	7	72
ISONEW	2015-06-12	11:55:20	33	2	PP3P120	37	8	1
ISONEW	2015-06-12	11:55:20	49	1	NOSTIM	38	1	0
ISONEW	2015-06-12	11:55:20	50	2	NOSTIM	38	2	0
ISONEW	2015-06-12	11:55:20	43	1	NOSTIM	38	3	0
ISONEW	2015-06-12	11:55:20	20	2	NOSTIM	38	4	5
ISONEW	2015-06-12	11:55:20	37	1	NOSTIM	38	5	0
ISONEW	2015-06-12	11:55:20	46	2	NOSTIM	38	6	0
ISONEW	2015-06-12	11:55:20	7	1	NOSTIM	38	7	0
ISONEW	2015-06-12	11:55:20	33	2	NOSTIM	38	8	0
ISONEW	2015-06-12	11:55:20	49	1	PP12P120	39	1	2
ISONEW	2015-06-12	11:55:20	50	2	PP12P120	39	2	13
ISONEW	2015-06-12	11:55:20	43	1	PP12P120	39	3	0
ISONEW	2015-06-12	11:55:20	20	2	PP12P120	39	4	28
ISONEW	2015-06-12	11:55:20	37	1	PP12P120	39	5	35
ISONEW	2015-06-12	11:55:20	46	2	PP12P120	39	6	2
ISONEW	2015-06-12	11:55:20	7	1	PP12P120	39	7	4
ISONEW	2015-06-12	11:55:20	33	2	PP12P120	39	8	23
ISONEW	2015-06-12	11:55:20	49	1	NOSTIM	40	1	0
ISONEW	2015-06-12	11:55:20	50	2	NOSTIM	40	2	0
ISONEW	2015-06-12	11:55:20	43	1	NOSTIM	40	3	0
ISONEW	2015-06-12	11:55:20	20	2	NOSTIM	40	4	0
ISONEW	2015-06-12	11:55:20	37	1	NOSTIM	40	5	0
ISONEW	2015-06-12	11:55:20	46	2	NOSTIM	40	6	0
ISONEW	2015-06-12	11:55:20	7	1	NOSTIM	40	7	0
ISONEW	2015-06-12	11:55:20	33	2	NOSTIM	40	8	0
ISONEW	2015-06-12	11:55:20	49	1	PP6P120	41	1	13
ISONEW	2015-06-12	11:55:20	50	2	PP6P120	41	2	91
ISONEW	2015-06-12	11:55:20	43	1	PP6P120	41	3	7
ISONEW	2015-06-12	11:55:20	20	2	PP6P120	41	4	50
ISONEW	2015-06-12	11:55:20	37	1	PP6P120	41	5	13
ISONEW	2015-06-12	11:55:20	46	2	PP6P120	41	6	6
ISONEW	2015-06-12	11:55:20	7	1	PP6P120	41	7	7
ISONEW	2015-06-12	11:55:20	33	2	PP6P120	41	8	6
ISONEW	2015-06-12	11:55:20	49	1	NOSTIM	42	1	0
ISONEW	2015-06-12	11:55:20	50	2	NOSTIM	42	2	0
ISONEW	2015-06-12	11:55:20	43	1	NOSTIM	42	3	0
ISONEW	2015-06-12	11:55:20	20	2	NOSTIM	42	4	0
ISONEW	2015-06-12	11:55:20	37	1	NOSTIM	42	5	0
ISONEW	2015-06-12	11:55:20	46	2	NOSTIM	42	6	0
ISONEW	2015-06-12	11:55:20	7	1	NOSTIM	42	7	0
ISONEW	2015-06-12	11:55:20	33	2	NOSTIM	42	8	4
ISONEW	2015-06-12	11:55:20	49	1	P120	43	1	167
ISONEW	2015-06-12	11:55:20	50	2	P120	43	2	109
ISONEW	2015-06-12	11:55:20	43	1	P120	43	3	90
ISONEW	2015-06-12	11:55:20	20	2	P120	43	4	60
ISONEW	2015-06-12	11:55:20	37	1	P120	43	5	62
ISONEW	2015-06-12	11:55:20	46	2	P120	43	6	21
ISONEW	2015-06-12	11:55:20	7	1	P120	43	7	35
ISONEW	2015-06-12	11:55:20	33	2	P120	43	8	14
ISONEW	2015-06-12	11:55:20	49	1	NOSTIM	44	1	0
ISONEW	2015-06-12	11:55:20	50	2	NOSTIM	44	2	0
ISONEW	2015-06-12	11:55:20	43	1	NOSTIM	44	3	0
ISONEW	2015-06-12	11:55:20	20	2	NOSTIM	44	4	6
ISONEW	2015-06-12	11:55:20	37	1	NOSTIM	44	5	0
ISONEW	2015-06-12	11:55:20	46	2	NOSTIM	44	6	0
ISONEW	2015-06-12	11:55:20	7	1	NOSTIM	44	7	0
ISONEW	2015-06-12	11:55:20	33	2	NOSTIM	44	8	14
ISONEW	2015-06-12	11:55:20	49	1	PP3P120	45	1	38
ISONEW	2015-06-12	11:55:20	50	2	PP3P120	45	2	67
ISONEW	2015-06-12	11:55:20	43	1	PP3P120	45	3	9
ISONEW	2015-06-12	11:55:20	20	2	PP3P120	45	4	128
ISONEW	2015-06-12	11:55:20	37	1	PP3P120	45	5	128
ISONEW	2015-06-12	11:55:20	46	2	PP3P120	45	6	4
ISONEW	2015-06-12	11:55:20	7	1	PP3P120	45	7	24
ISONEW	2015-06-12	11:55:20	33	2	PP3P120	45	8	16
ISONEW	2015-06-12	11:55:20	49	1	NOSTIM	46	1	0
ISONEW	2015-06-12	11:55:20	50	2	NOSTIM	46	2	0
ISONEW	2015-06-12	11:55:20	43	1	NOSTIM	46	3	0
ISONEW	2015-06-12	11:55:20	20	2	NOSTIM	46	4	4
ISONEW	2015-06-12	11:55:20	37	1	NOSTIM	46	5	0
ISONEW	2015-06-12	11:55:20	46	2	NOSTIM	46	6	0
ISONEW	2015-06-12	11:55:20	7	1	NOSTIM	46	7	0
ISONEW	2015-06-12	11:55:20	33	2	NOSTIM	46	8	0
ISONEW	2015-06-12	11:55:20	49	1	PP12P120	47	1	1
ISONEW	2015-06-12	11:55:20	50	2	PP12P120	47	2	43
ISONEW	2015-06-12	11:55:20	43	1	PP12P120	47	3	0
ISONEW	2015-06-12	11:55:20	20	2	PP12P120	47	4	46
ISONEW	2015-06-12	11:55:20	37	1	PP12P120	47	5	59
ISONEW	2015-06-12	11:55:20	46	2	PP12P120	47	6	1
ISONEW	2015-06-12	11:55:20	7	1	PP12P120	47	7	33
ISONEW	2015-06-12	11:55:20	33	2	PP12P120	47	8	35
ISONEW	2015-06-12	11:55:20	49	1	NOSTIM	48	1	0
ISONEW	2015-06-12	11:55:20	50	2	NOSTIM	48	2	0
ISONEW	2015-06-12	11:55:20	43	1	NOSTIM	48	3	0
ISONEW	2015-06-12	11:55:20	20	2	NOSTIM	48	4	13
ISONEW	2015-06-12	11:55:20	37	1	NOSTIM	48	5	0
ISONEW	2015-06-12	11:55:20	46	2	NOSTIM	48	6	0
ISONEW	2015-06-12	11:55:20	7	1	NOSTIM	48	7	0
ISONEW	2015-06-12	11:55:20	33	2	NOSTIM	48	8	2
ISONEW	2015-06-12	11:55:20	49	1	PP6P120	49	1	0
ISONEW	2015-06-12	11:55:20	50	2	PP6P120	49	2	94
ISONEW	2015-06-12	11:55:20	43	1	PP6P120	49	3	30
ISONEW	2015-06-12	11:55:20	20	2	PP6P120	49	4	47
ISONEW	2015-06-12	11:55:20	37	1	PP6P120	49	5	20
ISONEW	2015-06-12	11:55:20	46	2	PP6P120	49	6	8
ISONEW	2015-06-12	11:55:20	7	1	PP6P120	49	7	38
ISONEW	2015-06-12	11:55:20	33	2	PP6P120	49	8	37
ISONEW	2015-06-12	11:55:20	49	1	NOSTIM	50	1	0
ISONEW	2015-06-12	11:55:20	50	2	NOSTIM	50	2	0
ISONEW	2015-06-12	11:55:20	43	1	NOSTIM	50	3	0
ISONEW	2015-06-12	11:55:20	20	2	NOSTIM	50	4	4
ISONEW	2015-06-12	11:55:20	37	1	NOSTIM	50	5	0
ISONEW	2015-06-12	11:55:20	46	2	NOSTIM	50	6	0
ISONEW	2015-06-12	11:55:20	7	1	NOSTIM	50	7	0
ISONEW	2015-06-12	11:55:20	33	2	NOSTIM	50	8	2
ISONEW	2015-06-12	11:55:20	49	1	P120	51	1	168
ISONEW	2015-06-12	11:55:20	50	2	P120	51	2	67
ISONEW	2015-06-12	11:55:20	43	1	P120	51	3	93
ISONEW	2015-06-12	11:55:20	20	2	P120	51	4	98
ISONEW	2015-06-12	11:55:20	37	1	P120	51	5	74
ISONEW	2015-06-12	11:55:20	46	2	P120	51	6	36
ISONEW	2015-06-12	11:55:20	7	1	P120	51	7	8
ISONEW	2015-06-12	11:55:20	33	2	P120	51	8	66
ISONEW	2015-06-12	11:55:20	49	1	NOSTIM	52	1	0
ISONEW	2015-06-12	11:55:20	50	2	NOSTIM	52	2	0
ISONEW	2015-06-12	11:55:20	43	1	NOSTIM	52	3	0
ISONEW	2015-06-12	11:55:20	20	2	NOSTIM	52	4	9
ISONEW	2015-06-12	11:55:20	37	1	NOSTIM	52	5	0
ISONEW	2015-06-12	11:55:20	46	2	NOSTIM	52	6	0
ISONEW	2015-06-12	11:55:20	7	1	NOSTIM	52	7	0
ISONEW	2015-06-12	11:55:20	33	2	NOSTIM	52	8	0
ISONEW	2015-06-12	11:55:20	49	1	PP3P120	53	1	27
ISONEW	2015-06-12	11:55:20	50	2	PP3P120	53	2	60
ISONEW	2015-06-12	11:55:20	43	1	PP3P120	53	3	137
ISONEW	2015-06-12	11:55:20	20	2	PP3P120	53	4	123
ISONEW	2015-06-12	11:55:20	37	1	PP3P120	53	5	65
ISONEW	2015-06-12	11:55:20	46	2	PP3P120	53	6	6
ISONEW	2015-06-12	11:55:20	7	1	PP3P120	53	7	11
ISONEW	2015-06-12	11:55:20	33	2	PP3P120	53	8	13
ISONEW	2015-06-12	11:55:20	49	1	NOSTIM	54	1	0
ISONEW	2015-06-12	11:55:20	50	2	NOSTIM	54	2	0
ISONEW	2015-06-12	11:55:20	43	1	NOSTIM	54	3	0
ISONEW	2015-06-12	11:55:20	20	2	NOSTIM	54	4	11
ISONEW	2015-06-12	11:55:20	37	1	NOSTIM	54	5	0
ISONEW	2015-06-12	11:55:20	46	2	NOSTIM	54	6	0
ISONEW	2015-06-12	11:55:20	7	1	NOSTIM	54	7	0
ISONEW	2015-06-12	11:55:20	33	2	NOSTIM	54	8	0
ISONEW	2015-06-12	11:55:20	49	1	PP12P120	55	1	30
ISONEW	2015-06-12	11:55:20	50	2	PP12P120	55	2	5
ISONEW	2015-06-12	11:55:20	43	1	PP12P120	55	3	13
ISONEW	2015-06-12	11:55:20	20	2	PP12P120	55	4	147
ISONEW	2015-06-12	11:55:20	37	1	PP12P120	55	5	25
ISONEW	2015-06-12	11:55:20	46	2	PP12P120	55	6	0
ISONEW	2015-06-12	11:55:20	7	1	PP12P120	55	7	2
ISONEW	2015-06-12	11:55:20	33	2	PP12P120	55	8	11
ISONEW	2015-06-12	11:55:20	49	1	NOSTIM	56	1	0
ISONEW	2015-06-12	11:55:20	50	2	NOSTIM	56	2	0
ISONEW	2015-06-12	11:55:20	43	1	NOSTIM	56	3	0
ISONEW	2015-06-12	11:55:20	20	2	NOSTIM	56	4	0
ISONEW	2015-06-12	11:55:20	37	1	NOSTIM	56	5	0
ISONEW	2015-06-12	11:55:20	46	2	NOSTIM	56	6	0
ISONEW	2015-06-12	11:55:20	7	1	NOSTIM	56	7	0
ISONEW	2015-06-12	11:55:20	33	2	NOSTIM	56	8	0
ISONEW	2015-06-12	11:55:20	49	1	P120	57	1	23
ISONEW	2015-06-12	11:55:20	50	2	P120	57	2	52
ISONEW	2015-06-12	11:55:20	43	1	P120	57	3	184
ISONEW	2015-06-12	11:55:20	20	2	P120	57	4	133
ISONEW	2015-06-12	11:55:20	37	1	P120	57	5	53
ISONEW	2015-06-12	11:55:20	46	2	P120	57	6	8
ISONEW	2015-06-12	11:55:20	7	1	P120	57	7	20
ISONEW	2015-06-12	11:55:20	33	2	P120	57	8	10
ISONEW	2015-06-12	11:55:20	49	1	NOSTIM	58	1	0
ISONEW	2015-06-12	11:55:20	50	2	NOSTIM	58	2	0
ISONEW	2015-06-12	11:55:20	43	1	NOSTIM	58	3	0
ISONEW	2015-06-12	11:55:20	20	2	NOSTIM	58	4	0
ISONEW	2015-06-12	11:55:20	37	1	NOSTIM	58	5	0
ISONEW	2015-06-12	11:55:20	46	2	NOSTIM	58	6	0
ISONEW	2015-06-12	11:55:20	7	1	NOSTIM	58	7	0
ISONEW	2015-06-12	11:55:20	33	2	NOSTIM	58	8	0
ISONEW	2015-06-12	11:55:20	49	1	PP6P120	59	1	9
ISONEW	2015-06-12	11:55:20	50	2	PP6P120	59	2	16
ISONEW	2015-06-12	11:55:20	43	1	PP6P120	59	3	32
ISONEW	2015-06-12	11:55:20	20	2	PP6P120	59	4	280
ISONEW	2015-06-12	11:55:20	37	1	PP6P120	59	5	48
ISONEW	2015-06-12	11:55:20	46	2	PP6P120	59	6	8
ISONEW	2015-06-12	11:55:20	7	1	PP6P120	59	7	26
ISONEW	2015-06-12	11:55:20	33	2	PP6P120	59	8	25
ISONEW	2015-06-12	11:55:20	49	1	NOSTIM	60	1	0
ISONEW	2015-06-12	11:55:20	50	2	NOSTIM	60	2	0
ISONEW	2015-06-12	11:55:20	43	1	NOSTIM	60	3	0
ISONEW	2015-06-12	11:55:20	20	2	NOSTIM	60	4	15
ISONEW	2015-06-12	11:55:20	37	1	NOSTIM	60	5	38
ISONEW	2015-06-12	11:55:20	46	2	NOSTIM	60	6	0
ISONEW	2015-06-12	11:55:20	7	1	NOSTIM	60	7	0
ISONEW	2015-06-12	11:55:20	33	2	NOSTIM	60	8	0
ISONEW	2015-06-12	11:55:20	49	1	PP6P120	61	1	35
ISONEW	2015-06-12	11:55:20	50	2	PP6P120	61	2	28
ISONEW	2015-06-12	11:55:20	43	1	PP6P120	61	3	64
ISONEW	2015-06-12	11:55:20	20	2	PP6P120	61	4	161
ISONEW	2015-06-12	11:55:20	37	1	PP6P120	61	5	76
ISONEW	2015-06-12	11:55:20	46	2	PP6P120	61	6	2
ISONEW	2015-06-12	11:55:20	7	1	PP6P120	61	7	32
ISONEW	2015-06-12	11:55:20	33	2	PP6P120	61	8	13
ISONEW	2015-06-12	11:55:20	49	1	NOSTIM	62	1	0
ISONEW	2015-06-12	11:55:20	50	2	NOSTIM	62	2	0
ISONEW	2015-06-12	11:55:20	43	1	NOSTIM	62	3	0
ISONEW	2015-06-12	11:55:20	20	2	NOSTIM	62	4	1
ISONEW	2015-06-12	11:55:20	37	1	NOSTIM	62	5	0
ISONEW	2015-06-12	11:55:20	46	2	NOSTIM	62	6	0
ISONEW	2015-06-12	11:55:20	7	1	NOSTIM	62	7	0
ISONEW	2015-06-12	11:55:20	33	2	NOSTIM	62	8	0
ISONEW	2015-06-12	11:55:20	49	1	PP12P120	63	1	1
ISONEW	2015-06-12	11:55:20	50	2	PP12P120	63	2	13
ISONEW	2015-06-12	11:55:20	43	1	PP12P120	63	3	50
ISONEW	2015-06-12	11:55:20	20	2	PP12P120	63	4	25
ISONEW	2015-06-12	11:55:20	37	1	PP12P120	63	5	50
ISONEW	2015-06-12	11:55:20	46	2	PP12P120	63	6	4
ISONEW	2015-06-12	11:55:20	7	1	PP12P120	63	7	1
ISONEW	2015-06-12	11:55:20	33	2	PP12P120	63	8	2
ISONEW	2015-06-12	11:55:20	49	1	NOSTIM	64	1	0
ISONEW	2015-06-12	11:55:20	50	2	NOSTIM	64	2	0
ISONEW	2015-06-12	11:55:20	43	1	NOSTIM	64	3	0
ISONEW	2015-06-12	11:55:20	20	2	NOSTIM	64	4	13
ISONEW	2015-06-12	11:55:20	37	1	NOSTIM	64	5	0
ISONEW	2015-06-12	11:55:20	46	2	NOSTIM	64	6	0
ISONEW	2015-06-12	11:55:20	7	1	NOSTIM	64	7	0
ISONEW	2015-06-12	11:55:20	33	2	NOSTIM	64	8	0
ISONEW	2015-06-12	11:55:20	49	1	PP3P120	65	1	26
ISONEW	2015-06-12	11:55:20	50	2	PP3P120	65	2	69
ISONEW	2015-06-12	11:55:20	43	1	PP3P120	65	3	45
ISONEW	2015-06-12	11:55:20	20	2	PP3P120	65	4	60
ISONEW	2015-06-12	11:55:20	37	1	PP3P120	65	5	70
ISONEW	2015-06-12	11:55:20	46	2	PP3P120	65	6	25
ISONEW	2015-06-12	11:55:20	7	1	PP3P120	65	7	24
ISONEW	2015-06-12	11:55:20	33	2	PP3P120	65	8	2
ISONEW	2015-06-12	11:55:20	49	1	NOSTIM	66	1	0
ISONEW	2015-06-12	11:55:20	50	2	NOSTIM	66	2	0
ISONEW	2015-06-12	11:55:20	43	1	NOSTIM	66	3	0
ISONEW	2015-06-12	11:55:20	20	2	NOSTIM	66	4	13
ISONEW	2015-06-12	11:55:20	37	1	NOSTIM	66	5	0
ISONEW	2015-06-12	11:55:20	46	2	NOSTIM	66	6	0
ISONEW	2015-06-12	11:55:20	7	1	NOSTIM	66	7	0
ISONEW	2015-06-12	11:55:20	33	2	NOSTIM	66	8	0
ISONEW	2015-06-12	11:55:20	49	1	P120	67	1	40
ISONEW	2015-06-12	11:55:20	50	2	P120	67	2	6
ISONEW	2015-06-12	11:55:20	43	1	P120	67	3	81
ISONEW	2015-06-12	11:55:20	20	2	P120	67	4	189
ISONEW	2015-06-12	11:55:20	37	1	P120	67	5	89
ISONEW	2015-06-12	11:55:20	46	2	P120	67	6	1
ISONEW	2015-06-12	11:55:20	7	1	P120	67	7	56
ISONEW	2015-06-12	11:55:20	33	2	P120	67	8	12
ISONEW	2015-06-12	11:55:20	49	1	NOSTIM	68	1	0
ISONEW	2015-06-12	11:55:20	50	2	NOSTIM	68	2	0
ISONEW	2015-06-12	11:55:20	43	1	NOSTIM	68	3	0
ISONEW	2015-06-12	11:55:20	20	2	NOSTIM	68	4	4
ISONEW	2015-06-12	11:55:20	37	1	NOSTIM	68	5	0
ISONEW	2015-06-12	11:55:20	46	2	NOSTIM	68	6	20
ISONEW	2015-06-12	11:55:20	7	1	NOSTIM	68	7	0
ISONEW	2015-06-12	11:55:20	33	2	NOSTIM	68	8	0
ISONEW	2015-06-12	11:55:20	49	1	PP6P120	69	1	0
ISONEW	2015-06-12	11:55:20	50	2	PP6P120	69	2	10
ISONEW	2015-06-12	11:55:20	43	1	PP6P120	69	3	23
ISONEW	2015-06-12	11:55:20	20	2	PP6P120	69	4	35
ISONEW	2015-06-12	11:55:20	37	1	PP6P120	69	5	2
ISONEW	2015-06-12	11:55:20	46	2	PP6P120	69	6	4
ISONEW	2015-06-12	11:55:20	7	1	PP6P120	69	7	4
ISONEW	2015-06-12	11:55:20	33	2	PP6P120	69	8	0
ISONEW	2015-06-12	11:55:20	49	1	NOSTIM	70	1	0
ISONEW	2015-06-12	11:55:20	50	2	NOSTIM	70	2	5
ISONEW	2015-06-12	11:55:20	43	1	NOSTIM	70	3	0
ISONEW	2015-06-12	11:55:20	20	2	NOSTIM	70	4	0
ISONEW	2015-06-12	11:55:20	37	1	NOSTIM	70	5	0
ISONEW	2015-06-12	11:55:20	46	2	NOSTIM	70	6	0
ISONEW	2015-06-12	11:55:20	7	1	NOSTIM	70	7	0
ISONEW	2015-06-12	11:55:20	33	2	NOSTIM	70	8	0
ISONEW	2015-06-12	11:55:20	49	1	PP3P120	71	1	15
ISONEW	2015-06-12	11:55:20	50	2	PP3P120	71	2	133
ISONEW	2015-06-12	11:55:20	43	1	PP3P120	71	3	103
ISONEW	2015-06-12	11:55:20	20	2	PP3P120	71	4	78
ISONEW	2015-06-12	11:55:20	37	1	PP3P120	71	5	31
ISONEW	2015-06-12	11:55:20	46	2	PP3P120	71	6	0
ISONEW	2015-06-12	11:55:20	7	1	PP3P120	71	7	14
ISONEW	2015-06-12	11:55:20	33	2	PP3P120	71	8	8
ISONEW	2015-06-12	11:55:20	49	1	NOSTIM	72	1	0
ISONEW	2015-06-12	11:55:20	50	2	NOSTIM	72	2	0
ISONEW	2015-06-12	11:55:20	43	1	NOSTIM	72	3	0
ISONEW	2015-06-12	11:55:20	20	2	NOSTIM	72	4	6
ISONEW	2015-06-12	11:55:20	37	1	NOSTIM	72	5	0
ISONEW	2015-06-12	11:55:20	46	2	NOSTIM	72	6	0
ISONEW	2015-06-12	11:55:20	7	1	NOSTIM	72	7	0
ISONEW	2015-06-12	11:55:20	33	2	NOSTIM	72	8	27
ISONEW	2015-06-12	11:55:20	49	1	PP6P120	73	1	7
ISONEW	2015-06-12	11:55:20	50	2	PP6P120	73	2	9
ISONEW	2015-06-12	11:55:20	43	1	PP6P120	73	3	41
ISONEW	2015-06-12	11:55:20	20	2	PP6P120	73	4	46
ISONEW	2015-06-12	11:55:20	37	1	PP6P120	73	5	41
ISONEW	2015-06-12	11:55:20	46	2	PP6P120	73	6	5
ISONEW	2015-06-12	11:55:20	7	1	PP6P120	73	7	12
ISONEW	2015-06-12	11:55:20	33	2	PP6P120	73	8	41
ISONEW	2015-06-12	11:55:20	49	1	NOSTIM	74	1	0
ISONEW	2015-06-12	11:55:20	50	2	NOSTIM	74	2	0
ISONEW	2015-06-12	11:55:20	43	1	NOSTIM	74	3	0
ISONEW	2015-06-12	11:55:20	20	2	NOSTIM	74	4	9
ISONEW	2015-06-12	11:55:20	37	1	NOSTIM	74	5	0
ISONEW	2015-06-12	11:55:20	46	2	NOSTIM	74	6	0
ISONEW	2015-06-12	11:55:20	7	1	NOSTIM	74	7	0
ISONEW	2015-06-12	11:55:20	33	2	NOSTIM	74	8	0
ISONEW	2015-06-12	11:55:20	49	1	P120	75	1	76
ISONEW	2015-06-12	11:55:20	50	2	P120	75	2	75
ISONEW	2015-06-12	11:55:20	43	1	P120	75	3	271
ISONEW	2015-06-12	11:55:20	20	2	P120	75	4	70
ISONEW	2015-06-12	11:55:20	37	1	P120	75	5	504
ISONEW	2015-06-12	11:55:20	46	2	P120	75	6	24
ISONEW	2015-06-12	11:55:20	7	1	P120	75	7	19
ISONEW	2015-06-12	11:55:20	33	2	P120	75	8	55
ISONEW	2015-06-12	11:55:20	49	1	NOSTIM	76	1	0
ISONEW	2015-06-12	11:55:20	50	2	NOSTIM	76	2	0
ISONEW	2015-06-12	11:55:20	43	1	NOSTIM	76	3	0
ISONEW	2015-06-12	11:55:20	20	2	NOSTIM	76	4	3
ISONEW	2015-06-12	11:55:20	37	1	NOSTIM	76	5	0
ISONEW	2015-06-12	11:55:20	46	2	NOSTIM	76	6	0
ISONEW	2015-06-12	11:55:20	7	1	NOSTIM	76	7	0
ISONEW	2015-06-12	11:55:20	33	2	NOSTIM	76	8	136
ISONEW	2015-06-12	11:55:20	49	1	PP12P120	77	1	4
ISONEW	2015-06-12	11:55:20	50	2	PP12P120	77	2	73
ISONEW	2015-06-12	11:55:20	43	1	PP12P120	77	3	40
ISONEW	2015-06-12	11:55:20	20	2	PP12P120	77	4	40
ISONEW	2015-06-12	11:55:20	37	1	PP12P120	77	5	25
ISONEW	2015-06-12	11:55:20	46	2	PP12P120	77	6	1
ISONEW	2015-06-12	11:55:20	7	1	PP12P120	77	7	3
ISONEW	2015-06-12	11:55:20	33	2	PP12P120	77	8	62
ISONEW	2015-06-12	11:55:20	49	1	NOSTIM	78	1	0
ISONEW	2015-06-12	11:55:20	50	2	NOSTIM	78	2	0
ISONEW	2015-06-12	11:55:20	43	1	NOSTIM	78	3	0
ISONEW	2015-06-12	11:55:20	20	2	NOSTIM	78	4	19
ISONEW	2015-06-12	11:55:20	37	1	NOSTIM	78	5	0
ISONEW	2015-06-12	11:55:20	46	2	NOSTIM	78	6	0
ISONEW	2015-06-12	11:55:20	7	1	NOSTIM	78	7	0
ISONEW	2015-06-12	11:55:20	33	2	NOSTIM	78	8	0
ISONEW	2015-06-12	11:55:20	49	1	P120	79	1	1
ISONEW	2015-06-12	11:55:20	50	2	P120	79	2	56
ISONEW	2015-06-12	11:55:20	43	1	P120	79	3	189
ISONEW	2015-06-12	11:55:20	20	2	P120	79	4	170
ISONEW	2015-06-12	11:55:20	37	1	P120	79	5	180
ISONEW	2015-06-12	11:55:20	46	2	P120	79	6	2
ISONEW	2015-06-12	11:55:20	7	1	P120	79	7	87
ISONEW	2015-06-12	11:55:20	33	2	P120	79	8	5
ISONEW	2015-06-12	11:55:20	49	1	NOSTIM	80	1	0
ISONEW	2015-06-12	11:55:20	50	2	NOSTIM	80	2	0
ISONEW	2015-06-12	11:55:20	43	1	NOSTIM	80	3	0
ISONEW	2015-06-12	11:55:20	20	2	NOSTIM	80	4	67
ISONEW	2015-06-12	11:55:20	37	1	NOSTIM	80	5	5
ISONEW	2015-06-12	11:55:20	46	2	NOSTIM	80	6	0
ISONEW	2015-06-12	11:55:20	7	1	NOSTIM	80	7	0
ISONEW	2015-06-12	11:55:20	33	2	NOSTIM	80	8	0
ISONEW	2015-06-12	11:55:20	49	1	PP3P120	81	1	4
ISONEW	2015-06-12	11:55:20	50	2	PP3P120	81	2	277
ISONEW	2015-06-12	11:55:20	43	1	PP3P120	81	3	8
ISONEW	2015-06-12	11:55:20	20	2	PP3P120	81	4	11
ISONEW	2015-06-12	11:55:20	37	1	PP3P120	81	5	18
ISONEW	2015-06-12	11:55:20	46	2	PP3P120	81	6	51
ISONEW	2015-06-12	11:55:20	7	1	PP3P120	81	7	48
ISONEW	2015-06-12	11:55:20	33	2	PP3P120	81	8	0
ISONEW	2015-06-12	11:55:20	49	1	NOSTIM	82	1	0
ISONEW	2015-06-12	11:55:20	50	2	NOSTIM	82	2	0
ISONEW	2015-06-12	11:55:20	43	1	NOSTIM	82	3	0
ISONEW	2015-06-12	11:55:20	20	2	NOSTIM	82	4	20
ISONEW	2015-06-12	11:55:20	37	1	NOSTIM	82	5	0
ISONEW	2015-06-12	11:55:20	46	2	NOSTIM	82	6	0
ISONEW	2015-06-12	11:55:20	7	1	NOSTIM	82	7	3
ISONEW	2015-06-12	11:55:20	33	2	NOSTIM	82	8	0
ISONEW	2015-06-12	11:55:20	49	1	PP12P120	83	1	0
ISONEW	2015-06-12	11:55:20	50	2	PP12P120	83	2	18
ISONEW	2015-06-12	11:55:20	43	1	PP12P120	83	3	2
ISONEW	2015-06-12	11:55:20	20	2	PP12P120	83	4	68
ISONEW	2015-06-12	11:55:20	37	1	PP12P120	83	5	19
ISONEW	2015-06-12	11:55:20	46	2	PP12P120	83	6	0
ISONEW	2015-06-12	11:55:20	7	1	PP12P120	83	7	4
ISONEW	2015-06-12	11:55:20	33	2	PP12P120	83	8	0
ISONEW	2015-06-12	11:55:20	49	1	NOSTIM	84	1	0
ISONEW	2015-06-12	11:55:20	50	2	NOSTIM	84	2	0
ISONEW	2015-06-12	11:55:20	43	1	NOSTIM	84	3	0
ISONEW	2015-06-12	11:55:20	20	2	NOSTIM	84	4	11
ISONEW	2015-06-12	11:55:20	37	1	NOSTIM	84	5	0
ISONEW	2015-06-12	11:55:20	46	2	NOSTIM	84	6	0
ISONEW	2015-06-12	11:55:20	7	1	NOSTIM	84	7	0
ISONEW	2015-06-12	11:55:20	33	2	NOSTIM	84	8	10
ISONEW	2015-06-12	11:55:20	49	1	PP3P120	85	1	3
ISONEW	2015-06-12	11:55:20	50	2	PP3P120	85	2	6
ISONEW	2015-06-12	11:55:20	43	1	PP3P120	85	3	20
ISONEW	2015-06-12	11:55:20	20	2	PP3P120	85	4	103
ISONEW	2015-06-12	11:55:20	37	1	PP3P120	85	5	223
ISONEW	2015-06-12	11:55:20	46	2	PP3P120	85	6	8
ISONEW	2015-06-12	11:55:20	7	1	PP3P120	85	7	107
ISONEW	2015-06-12	11:55:20	33	2	PP3P120	85	8	88
ISONEW	2015-06-12	11:55:20	49	1	NOSTIM	86	1	0
ISONEW	2015-06-12	11:55:20	50	2	NOSTIM	86	2	0
ISONEW	2015-06-12	11:55:20	43	1	NOSTIM	86	3	0
ISONEW	2015-06-12	11:55:20	20	2	NOSTIM	86	4	0
ISONEW	2015-06-12	11:55:20	37	1	NOSTIM	86	5	0
ISONEW	2015-06-12	11:55:20	46	2	NOSTIM	86	6	0
ISONEW	2015-06-12	11:55:20	7	1	NOSTIM	86	7	9
ISONEW	2015-06-12	11:55:20	33	2	NOSTIM	86	8	9
ISONEW	2015-06-12	11:55:20	49	1	PP12P120	87	1	14
ISONEW	2015-06-12	11:55:20	50	2	PP12P120	87	2	14
ISONEW	2015-06-12	11:55:20	43	1	PP12P120	87	3	3
ISONEW	2015-06-12	11:55:20	20	2	PP12P120	87	4	55
ISONEW	2015-06-12	11:55:20	37	1	PP12P120	87	5	95
ISONEW	2015-06-12	11:55:20	46	2	PP12P120	87	6	6
ISONEW	2015-06-12	11:55:20	7	1	PP12P120	87	7	19
ISONEW	2015-06-12	11:55:20	33	2	PP12P120	87	8	31
ISONEW	2015-06-12	11:55:20	49	1	NOSTIM	88	1	0
ISONEW	2015-06-12	11:55:20	50	2	NOSTIM	88	2	0
ISONEW	2015-06-12	11:55:20	43	1	NOSTIM	88	3	0
ISONEW	2015-06-12	11:55:20	20	2	NOSTIM	88	4	1
ISONEW	2015-06-12	11:55:20	37	1	NOSTIM	88	5	0
ISONEW	2015-06-12	11:55:20	46	2	NOSTIM	88	6	0
ISONEW	2015-06-12	11:55:20	7	1	NOSTIM	88	7	0
ISONEW	2015-06-12	11:55:20	33	2	NOSTIM	88	8	0
ISONEW	2015-06-12	11:55:20	49	1	PP6P120	89	1	14
ISONEW	2015-06-12	11:55:20	50	2	PP6P120	89	2	19
ISONEW	2015-06-12	11:55:20	43	1	PP6P120	89	3	111
ISONEW	2015-06-12	11:55:20	20	2	PP6P120	89	4	127
ISONEW	2015-06-12	11:55:20	37	1	PP6P120	89	5	75
ISONEW	2015-06-12	11:55:20	46	2	PP6P120	89	6	2
ISONEW	2015-06-12	11:55:20	7	1	PP6P120	89	7	11
ISONEW	2015-06-12	11:55:20	33	2	PP6P120	89	8	87
ISONEW	2015-06-12	11:55:20	49	1	NOSTIM	90	1	0
ISONEW	2015-06-12	11:55:20	50	2	NOSTIM	90	2	0
ISONEW	2015-06-12	11:55:20	43	1	NOSTIM	90	3	0
ISONEW	2015-06-12	11:55:20	20	2	NOSTIM	90	4	2
ISONEW	2015-06-12	11:55:20	37	1	NOSTIM	90	5	0
ISONEW	2015-06-12	11:55:20	46	2	NOSTIM	90	6	0
ISONEW	2015-06-12	11:55:20	7	1	NOSTIM	90	7	0
ISONEW	2015-06-12	11:55:20	33	2	NOSTIM	90	8	11
ISONEW	2015-06-12	11:55:20	49	1	P120	91	1	29
ISONEW	2015-06-12	11:55:20	50	2	P120	91	2	42
ISONEW	2015-06-12	11:55:20	43	1	P120	91	3	305
ISONEW	2015-06-12	11:55:20	20	2	P120	91	4	190
ISONEW	2015-06-12	11:55:20	37	1	P120	91	5	173
ISONEW	2015-06-12	11:55:20	46	2	P120	91	6	0
ISONEW	2015-06-12	11:55:20	7	1	P120	91	7	463
ISONEW	2015-06-12	11:55:20	33	2	P120	91	8	70
ISONEW	2015-06-12	11:55:20	49	1	NOSTIM	92	1	0
ISONEW	2015-06-12	11:55:20	50	2	NOSTIM	92	2	0
ISONEW	2015-06-12	11:55:20	43	1	NOSTIM	92	3	0
ISONEW	2015-06-12	11:55:20	20	2	NOSTIM	92	4	1
ISONEW	2015-06-12	11:55:20	37	1	NOSTIM	92	5	3
ISONEW	2015-06-12	11:55:20	46	2	NOSTIM	92	6	0
ISONEW	2015-06-12	11:55:20	7	1	NOSTIM	92	7	0
ISONEW	2015-06-12	11:55:20	33	2	NOSTIM	92	8	0
ISONEW	2015-06-12	11:55:20	49	1	PP3P120	93	1	6
ISONEW	2015-06-12	11:55:20	50	2	PP3P120	93	2	19
ISONEW	2015-06-12	11:55:20	43	1	PP3P120	93	3	162
ISONEW	2015-06-12	11:55:20	20	2	PP3P120	93	4	31
ISONEW	2015-06-12	11:55:20	37	1	PP3P120	93	5	106
ISONEW	2015-06-12	11:55:20	46	2	PP3P120	93	6	31
ISONEW	2015-06-12	11:55:20	7	1	PP3P120	93	7	24
ISONEW	2015-06-12	11:55:20	33	2	PP3P120	93	8	63
ISONEW	2015-06-12	11:55:20	49	1	NOSTIM	94	1	0
ISONEW	2015-06-12	11:55:20	50	2	NOSTIM	94	2	0
ISONEW	2015-06-12	11:55:20	43	1	NOSTIM	94	3	0
ISONEW	2015-06-12	11:55:20	20	2	NOSTIM	94	4	1
ISONEW	2015-06-12	11:55:20	37	1	NOSTIM	94	5	0
ISONEW	2015-06-12	11:55:20	46	2	NOSTIM	94	6	0
ISONEW	2015-06-12	11:55:20	7	1	NOSTIM	94	7	0
ISONEW	2015-06-12	11:55:20	33	2	NOSTIM	94	8	51
ISONEW	2015-06-12	11:55:20	49	1	PP12P120	95	1	11
ISONEW	2015-06-12	11:55:20	50	2	PP12P120	95	2	43
ISONEW	2015-06-12	11:55:20	43	1	PP12P120	95	3	4
ISONEW	2015-06-12	11:55:20	20	2	PP12P120	95	4	68
ISONEW	2015-06-12	11:55:20	37	1	PP12P120	95	5	46
ISONEW	2015-06-12	11:55:20	46	2	PP12P120	95	6	0
ISONEW	2015-06-12	11:55:20	7	1	PP12P120	95	7	10
ISONEW	2015-06-12	11:55:20	33	2	PP12P120	95	8	13
ISONEW	2015-06-12	11:55:20	49	1	NOSTIM	96	1	0
ISONEW	2015-06-12	11:55:20	50	2	NOSTIM	96	2	0
ISONEW	2015-06-12	11:55:20	43	1	NOSTIM	96	3	0
ISONEW	2015-06-12	11:55:20	20	2	NOSTIM	96	4	0
ISONEW	2015-06-12	11:55:20	37	1	NOSTIM	96	5	0
ISONEW	2015-06-12	11:55:20	46	2	NOSTIM	96	6	0
ISONEW	2015-06-12	11:55:20	7	1	NOSTIM	96	7	0
ISONEW	2015-06-12	11:55:20	33	2	NOSTIM	96	8	0
ISONEW	2015-06-12	11:55:20	49	1	PP6P120	97	1	8
ISONEW	2015-06-12	11:55:20	50	2	PP6P120	97	2	34
ISONEW	2015-06-12	11:55:20	43	1	PP6P120	97	3	88
ISONEW	2015-06-12	11:55:20	20	2	PP6P120	97	4	116
ISONEW	2015-06-12	11:55:20	37	1	PP6P120	97	5	63
ISONEW	2015-06-12	11:55:20	46	2	PP6P120	97	6	0
ISONEW	2015-06-12	11:55:20	7	1	PP6P120	97	7	5
ISONEW	2015-06-12	11:55:20	33	2	PP6P120	97	8	6
ISONEW	2015-06-12	11:55:20	49	1	NOSTIM	98	1	0
ISONEW	2015-06-12	11:55:20	50	2	NOSTIM	98	2	0
ISONEW	2015-06-12	11:55:20	43	1	NOSTIM	98	3	0
ISONEW	2015-06-12	11:55:20	20	2	NOSTIM	98	4	2
ISONEW	2015-06-12	11:55:20	37	1	NOSTIM	98	5	0
ISONEW	2015-06-12	11:55:20	46	2	NOSTIM	98	6	0
ISONEW	2015-06-12	11:55:20	7	1	NOSTIM	98	7	0
ISONEW	2015-06-12	11:55:20	33	2	NOSTIM	98	8	0
ISONEW	2015-06-12	11:55:20	49	1	P120	99	1	35
ISONEW	2015-06-12	11:55:20	50	2	P120	99	2	16
ISONEW	2015-06-12	11:55:20	43	1	P120	99	3	201
ISONEW	2015-06-12	11:55:20	20	2	P120	99	4	203
ISONEW	2015-06-12	11:55:20	37	1	P120	99	5	73
ISONEW	2015-06-12	11:55:20	46	2	P120	99	6	13
ISONEW	2015-06-12	11:55:20	7	1	P120	99	7	13
ISONEW	2015-06-12	11:55:20	33	2	P120	99	8	5
ISONEW	2015-06-12	11:55:20	49	1	NOSTIM	100	1	0
ISONEW	2015-06-12	11:55:20	50	2	NOSTIM	100	2	1
ISONEW	2015-06-12	11:55:20	43	1	NOSTIM	100	3	0
ISONEW	2015-06-12	11:55:20	20	2	NOSTIM	100	4	30
ISONEW	2015-06-12	11:55:20	37	1	NOSTIM	100	5	0
ISONEW	2015-06-12	11:55:20	46	2	NOSTIM	100	6	0
ISONEW	2015-06-12	11:55:20	7	1	NOSTIM	100	7	4
ISONEW	2015-06-12	11:55:20	33	2	NOSTIM	100	8	0
ISONEW	2015-06-12	11:55:20	49	1	PP3P120	101	1	4
ISONEW	2015-06-12	11:55:20	50	2	PP3P120	101	2	15
ISONEW	2015-06-12	11:55:20	43	1	PP3P120	101	3	41
ISONEW	2015-06-12	11:55:20	20	2	PP3P120	101	4	75
ISONEW	2015-06-12	11:55:20	37	1	PP3P120	101	5	39
ISONEW	2015-06-12	11:55:20	46	2	PP3P120	101	6	10
ISONEW	2015-06-12	11:55:20	7	1	PP3P120	101	7	7
ISONEW	2015-06-12	11:55:20	33	2	PP3P120	101	8	6
ISONEW	2015-06-12	11:55:20	49	1	NOSTIM	102	1	0
ISONEW	2015-06-12	11:55:20	50	2	NOSTIM	102	2	0
ISONEW	2015-06-12	11:55:20	43	1	NOSTIM	102	3	0
ISONEW	2015-06-12	11:55:20	20	2	NOSTIM	102	4	0
ISONEW	2015-06-12	11:55:20	37	1	NOSTIM	102	5	0
ISONEW	2015-06-12	11:55:20	46	2	NOSTIM	102	6	0
ISONEW	2015-06-12	11:55:20	7	1	NOSTIM	102	7	2
ISONEW	2015-06-12	11:55:20	33	2	NOSTIM	102	8	0
ISONEW	2015-06-12	11:55:20	49	1	PP12P120	103	1	0
ISONEW	2015-06-12	11:55:20	50	2	PP12P120	103	2	3
ISONEW	2015-06-12	11:55:20	43	1	PP12P120	103	3	80
ISONEW	2015-06-12	11:55:20	20	2	PP12P120	103	4	221
ISONEW	2015-06-12	11:55:20	37	1	PP12P120	103	5	22
ISONEW	2015-06-12	11:55:20	46	2	PP12P120	103	6	0
ISONEW	2015-06-12	11:55:20	7	1	PP12P120	103	7	4
ISONEW	2015-06-12	11:55:20	33	2	PP12P120	103	8	18
ISONEW	2015-06-12	11:55:20	49	1	NOSTIM	104	1	0
ISONEW	2015-06-12	11:55:20	50	2	NOSTIM	104	2	0
ISONEW	2015-06-12	11:55:20	43	1	NOSTIM	104	3	0
ISONEW	2015-06-12	11:55:20	20	2	NOSTIM	104	4	0
ISONEW	2015-06-12	11:55:20	37	1	NOSTIM	104	5	1
ISONEW	2015-06-12	11:55:20	46	2	NOSTIM	104	6	0
ISONEW	2015-06-12	11:55:20	7	1	NOSTIM	104	7	0
ISONEW	2015-06-12	11:55:20	33	2	NOSTIM	104	8	0
ISONEW	2015-06-12	11:55:20	49	1	P120	105	1	18
ISONEW	2015-06-12	11:55:20	50	2	P120	105	2	19
ISONEW	2015-06-12	11:55:20	43	1	P120	105	3	196
ISONEW	2015-06-12	11:55:20	20	2	P120	105	4	112
ISONEW	2015-06-12	11:55:20	37	1	P120	105	5	96
ISONEW	2015-06-12	11:55:20	46	2	P120	105	6	25
ISONEW	2015-06-12	11:55:20	7	1	P120	105	7	10
ISONEW	2015-06-12	11:55:20	33	2	P120	105	8	7
ISONEW	2015-06-12	11:55:20	49	1	NOSTIM	106	1	0
ISONEW	2015-06-12	11:55:20	50	2	NOSTIM	106	2	0
ISONEW	2015-06-12	11:55:20	43	1	NOSTIM	106	3	0
ISONEW	2015-06-12	11:55:20	20	2	NOSTIM	106	4	8
ISONEW	2015-06-12	11:55:20	37	1	NOSTIM	106	5	0
ISONEW	2015-06-12	11:55:20	46	2	NOSTIM	106	6	0
ISONEW	2015-06-12	11:55:20	7	1	NOSTIM	106	7	0
ISONEW	2015-06-12	11:55:20	33	2	NOSTIM	106	8	0
ISONEW	2015-06-12	11:55:20	49	1	PP6P120	107	1	80
ISONEW	2015-06-12	11:55:20	50	2	PP6P120	107	2	190
ISONEW	2015-06-12	11:55:20	43	1	PP6P120	107	3	14
ISONEW	2015-06-12	11:55:20	20	2	PP6P120	107	4	202
ISONEW	2015-06-12	11:55:20	37	1	PP6P120	107	5	87
ISONEW	2015-06-12	11:55:20	46	2	PP6P120	107	6	11
ISONEW	2015-06-12	11:55:20	7	1	PP6P120	107	7	33
ISONEW	2015-06-12	11:55:20	33	2	PP6P120	107	8	2
ISONEW	2015-06-12	11:55:20	49	1	NOSTIM	108	1	0
ISONEW	2015-06-12	11:55:20	50	2	NOSTIM	108	2	0
ISONEW	2015-06-12	11:55:20	43	1	NOSTIM	108	3	0
ISONEW	2015-06-12	11:55:20	20	2	NOSTIM	108	4	1
ISONEW	2015-06-12	11:55:20	37	1	NOSTIM	108	5	0
ISONEW	2015-06-12	11:55:20	46	2	NOSTIM	108	6	0
ISONEW	2015-06-12	11:55:20	7	1	NOSTIM	108	7	0
ISONEW	2015-06-12	11:55:20	33	2	NOSTIM	108	8	0
ISONEW	2015-06-12	11:55:20	49	1	P120	109	1	138
ISONEW	2015-06-12	11:55:20	50	2	P120	109	2	144
ISONEW	2015-06-12	11:55:20	43	1	P120	109	3	228
ISONEW	2015-06-12	11:55:20	20	2	P120	109	4	121
ISONEW	2015-06-12	11:55:20	37	1	P120	109	5	291
ISONEW	2015-06-12	11:55:20	46	2	P120	109	6	14
ISONEW	2015-06-12	11:55:20	7	1	P120	109	7	86
ISONEW	2015-06-12	11:55:20	33	2	P120	109	8	1
ISONEW	2015-06-12	11:55:20	49	1	NOSTIM	110	1	0
ISONEW	2015-06-12	11:55:20	50	2	NOSTIM	110	2	0
ISONEW	2015-06-12	11:55:20	43	1	NOSTIM	110	3	0
ISONEW	2015-06-12	11:55:20	20	2	NOSTIM	110	4	11
ISONEW	2015-06-12	11:55:20	37	1	NOSTIM	110	5	0
ISONEW	2015-06-12	11:55:20	46	2	NOSTIM	110	6	0
ISONEW	2015-06-12	11:55:20	7	1	NOSTIM	110	7	0
ISONEW	2015-06-12	11:55:20	33	2	NOSTIM	110	8	2
ISONEW	2015-06-12	11:55:20	49	1	P120	111	1	155
ISONEW	2015-06-12	11:55:20	50	2	P120	111	2	13
ISONEW	2015-06-12	11:55:20	43	1	P120	111	3	227
ISONEW	2015-06-12	11:55:20	20	2	P120	111	4	92
ISONEW	2015-06-12	11:55:20	37	1	P120	111	5	107
ISONEW	2015-06-12	11:55:20	46	2	P120	111	6	35
ISONEW	2015-06-12	11:55:20	7	1	P120	111	7	53
ISONEW	2015-06-12	11:55:20	33	2	P120	111	8	2
ISONEW	2015-06-12	11:55:20	49	1	NOSTIM	112	1	0
ISONEW	2015-06-12	11:55:20	50	2	NOSTIM	112	2	0
ISONEW	2015-06-12	11:55:20	43	1	NOSTIM	112	3	0
ISONEW	2015-06-12	11:55:20	20	2	NOSTIM	112	4	6
ISONEW	2015-06-12	11:55:20	37	1	NOSTIM	112	5	0
ISONEW	2015-06-12	11:55:20	46	2	NOSTIM	112	6	0
ISONEW	2015-06-12	11:55:20	7	1	NOSTIM	112	7	0
ISONEW	2015-06-12	11:55:20	33	2	NOSTIM	112	8	0
ISONEW	2015-06-12	11:55:20	49	1	P120	113	1	44
ISONEW	2015-06-12	11:55:20	50	2	P120	113	2	3
ISONEW	2015-06-12	11:55:20	43	1	P120	113	3	77
ISONEW	2015-06-12	11:55:20	20	2	P120	113	4	312
ISONEW	2015-06-12	11:55:20	37	1	P120	113	5	98
ISONEW	2015-06-12	11:55:20	46	2	P120	113	6	46
ISONEW	2015-06-12	11:55:20	7	1	P120	113	7	19
ISONEW	2015-06-12	11:55:20	33	2	P120	113	8	11
ISONEW	2015-06-12	11:55:20	49	1	NOSTIM	114	1	0
ISONEW	2015-06-12	11:55:20	50	2	NOSTIM	114	2	0
ISONEW	2015-06-12	11:55:20	43	1	NOSTIM	114	3	0
ISONEW	2015-06-12	11:55:20	20	2	NOSTIM	114	4	23
ISONEW	2015-06-12	11:55:20	37	1	NOSTIM	114	5	1
ISONEW	2015-06-12	11:55:20	46	2	NOSTIM	114	6	0
ISONEW	2015-06-12	11:55:20	7	1	NOSTIM	114	7	0
ISONEW	2015-06-12	11:55:20	33	2	NOSTIM	114	8	0
ISONEW	2015-06-12	11:55:20	49	1	P120	115	1	209
ISONEW	2015-06-12	11:55:20	50	2	P120	115	2	42
ISONEW	2015-06-12	11:55:20	43	1	P120	115	3	281
ISONEW	2015-06-12	11:55:20	20	2	P120	115	4	95
ISONEW	2015-06-12	11:55:20	37	1	P120	115	5	780
ISONEW	2015-06-12	11:55:20	46	2	P120	115	6	27
ISONEW	2015-06-12	11:55:20	7	1	P120	115	7	182
ISONEW	2015-06-12	11:55:20	33	2	P120	115	8	2
ISONEW	2015-06-12	11:55:20	49	1	NOSTIM	116	1	0
ISONEW	2015-06-12	11:55:20	50	2	NOSTIM	116	2	0
ISONEW	2015-06-12	11:55:20	43	1	NOSTIM	116	3	0
ISONEW	2015-06-12	11:55:20	20	2	NOSTIM	116	4	7
ISONEW	2015-06-12	11:55:20	37	1	NOSTIM	116	5	0
ISONEW	2015-06-12	11:55:20	46	2	NOSTIM	116	6	0
ISONEW	2015-06-12	11:55:20	7	1	NOSTIM	116	7	1
ISONEW	2015-06-12	11:55:20	33	2	NOSTIM	116	8	0
ISONEW	2015-06-12	11:55:20	49	1	P120	117	1	36
ISONEW	2015-06-12	11:55:20	50	2	P120	117	2	164
ISONEW	2015-06-12	11:55:20	43	1	P120	117	3	225
ISONEW	2015-06-12	11:55:20	20	2	P120	117	4	69
ISONEW	2015-06-12	11:55:20	37	1	P120	117	5	579
ISONEW	2015-06-12	11:55:20	46	2	P120	117	6	96
ISONEW	2015-06-12	11:55:20	7	1	P120	117	7	87
ISONEW	2015-06-12	11:55:20	33	2	P120	117	8	3
ISONEW	2015-06-12	11:55:20	49	1	NOSTIM	118	1	0
ISONEW	2015-06-12	11:55:20	50	2	NOSTIM	118	2	5
ISONEW	2015-06-12	11:55:20	43	1	NOSTIM	118	3	0
ISONEW	2015-06-12	11:55:20	20	2	NOSTIM	118	4	2
ISONEW	2015-06-12	11:55:20	37	1	NOSTIM	118	5	0
ISONEW	2015-06-12	11:55:20	46	2	NOSTIM	118	6	0
ISONEW	2015-06-12	11:55:20	7	1	NOSTIM	118	7	5
ISONEW	2015-06-12	11:55:20	33	2	NOSTIM	118	8	0
ISONEW	2015-06-12	11:55:20	49	1	P120	119	1	87
ISONEW	2015-06-12	11:55:20	50	2	P120	119	2	5
ISONEW	2015-06-12	11:55:20	43	1	P120	119	3	302
ISONEW	2015-06-12	11:55:20	20	2	P120	119	4	144
ISONEW	2015-06-12	11:55:20	37	1	P120	119	5	295
ISONEW	2015-06-12	11:55:20	46	2	P120	119	6	57
ISONEW	2015-06-12	11:55:20	7	1	P120	119	7	112
ISONEW	2015-06-12	11:55:20	33	2	P120	119	8	10
ISONEW	2015-06-12	11:55:20	49	1	NOSTIM	120	1	0
ISONEW	2015-06-12	11:55:20	50	2	NOSTIM	120	2	0
ISONEW	2015-06-12	11:55:20	43	1	NOSTIM	120	3	0
ISONEW	2015-06-12	11:55:20	20	2	NOSTIM	120	4	116
ISONEW	2015-06-12	11:55:20	37	1	NOSTIM	120	5	0
ISONEW	2015-06-12	11:55:20	46	2	NOSTIM	120	6	0
ISONEW	2015-06-12	11:55:20	7	1	NOSTIM	120	7	0
ISONEW	2015-06-12	11:55:20	33	2	NOSTIM	120	8	0
ISONEW	2015-06-12	12:44:14	32	2	P120	1	1	172
ISONEW	2015-06-12	12:44:14	42	1	P120	1	2	660
ISONEW	2015-06-12	12:44:14	35	2	P120	1	3	119
ISONEW	2015-06-12	12:44:14	4	1	P120	1	4	882
ISONEW	2015-06-12	12:44:14	53	2	P120	1	5	424
ISONEW	2015-06-12	12:44:14	6	1	P120	1	6	1613
ISONEW	2015-06-12	12:44:14	39	2	P120	1	7	209
ISONEW	2015-06-12	12:44:14	8	1	P120	1	8	352
ISONEW	2015-06-12	12:44:14	32	2	NOSTIM	2	1	0
ISONEW	2015-06-12	12:44:14	42	1	NOSTIM	2	2	0
ISONEW	2015-06-12	12:44:14	35	2	NOSTIM	2	3	0
ISONEW	2015-06-12	12:44:14	4	1	NOSTIM	2	4	0
ISONEW	2015-06-12	12:44:14	53	2	NOSTIM	2	5	0
ISONEW	2015-06-12	12:44:14	6	1	NOSTIM	2	6	0
ISONEW	2015-06-12	12:44:14	39	2	NOSTIM	2	7	0
ISONEW	2015-06-12	12:44:14	8	1	NOSTIM	2	8	0
ISONEW	2015-06-12	12:44:14	32	2	P120	3	1	153
ISONEW	2015-06-12	12:44:14	42	1	P120	3	2	346
ISONEW	2015-06-12	12:44:14	35	2	P120	3	3	201
ISONEW	2015-06-12	12:44:14	4	1	P120	3	4	2399
ISONEW	2015-06-12	12:44:14	53	2	P120	3	5	801
ISONEW	2015-06-12	12:44:14	6	1	P120	3	6	1168
ISONEW	2015-06-12	12:44:14	39	2	P120	3	7	239
ISONEW	2015-06-12	12:44:14	8	1	P120	3	8	294
ISONEW	2015-06-12	12:44:14	32	2	NOSTIM	4	1	0
ISONEW	2015-06-12	12:44:14	42	1	NOSTIM	4	2	0
ISONEW	2015-06-12	12:44:14	35	2	NOSTIM	4	3	0
ISONEW	2015-06-12	12:44:14	4	1	NOSTIM	4	4	0
ISONEW	2015-06-12	12:44:14	53	2	NOSTIM	4	5	0
ISONEW	2015-06-12	12:44:14	6	1	NOSTIM	4	6	0
ISONEW	2015-06-12	12:44:14	39	2	NOSTIM	4	7	1
ISONEW	2015-06-12	12:44:14	8	1	NOSTIM	4	8	0
ISONEW	2015-06-12	12:44:14	32	2	P120	5	1	158
ISONEW	2015-06-12	12:44:14	42	1	P120	5	2	147
ISONEW	2015-06-12	12:44:14	35	2	P120	5	3	377
ISONEW	2015-06-12	12:44:14	4	1	P120	5	4	1621
ISONEW	2015-06-12	12:44:14	53	2	P120	5	5	240
ISONEW	2015-06-12	12:44:14	6	1	P120	5	6	1323
ISONEW	2015-06-12	12:44:14	39	2	P120	5	7	88
ISONEW	2015-06-12	12:44:14	8	1	P120	5	8	282
ISONEW	2015-06-12	12:44:14	32	2	NOSTIM	6	1	0
ISONEW	2015-06-12	12:44:14	42	1	NOSTIM	6	2	0
ISONEW	2015-06-12	12:44:14	35	2	NOSTIM	6	3	0
ISONEW	2015-06-12	12:44:14	4	1	NOSTIM	6	4	0
ISONEW	2015-06-12	12:44:14	53	2	NOSTIM	6	5	0
ISONEW	2015-06-12	12:44:14	6	1	NOSTIM	6	6	0
ISONEW	2015-06-12	12:44:14	39	2	NOSTIM	6	7	12
ISONEW	2015-06-12	12:44:14	8	1	NOSTIM	6	8	0
ISONEW	2015-06-12	12:44:14	32	2	P120	7	1	141
ISONEW	2015-06-12	12:44:14	42	1	P120	7	2	329
ISONEW	2015-06-12	12:44:14	35	2	P120	7	3	201
ISONEW	2015-06-12	12:44:14	4	1	P120	7	4	2159
ISONEW	2015-06-12	12:44:14	53	2	P120	7	5	628
ISONEW	2015-06-12	12:44:14	6	1	P120	7	6	975
ISONEW	2015-06-12	12:44:14	39	2	P120	7	7	169
ISONEW	2015-06-12	12:44:14	8	1	P120	7	8	158
ISONEW	2015-06-12	12:44:14	32	2	NOSTIM	8	1	0
ISONEW	2015-06-12	12:44:14	42	1	NOSTIM	8	2	0
ISONEW	2015-06-12	12:44:14	35	2	NOSTIM	8	3	0
ISONEW	2015-06-12	12:44:14	4	1	NOSTIM	8	4	0
ISONEW	2015-06-12	12:44:14	53	2	NOSTIM	8	5	0
ISONEW	2015-06-12	12:44:14	6	1	NOSTIM	8	6	0
ISONEW	2015-06-12	12:44:14	39	2	NOSTIM	8	7	0
ISONEW	2015-06-12	12:44:14	8	1	NOSTIM	8	8	24
ISONEW	2015-06-12	12:44:14	32	2	P120	9	1	146
ISONEW	2015-06-12	12:44:14	42	1	P120	9	2	257
ISONEW	2015-06-12	12:44:14	35	2	P120	9	3	269
ISONEW	2015-06-12	12:44:14	4	1	P120	9	4	1925
ISONEW	2015-06-12	12:44:14	53	2	P120	9	5	122
ISONEW	2015-06-12	12:44:14	6	1	P120	9	6	446
ISONEW	2015-06-12	12:44:14	39	2	P120	9	7	210
ISONEW	2015-06-12	12:44:14	8	1	P120	9	8	80
ISONEW	2015-06-12	12:44:14	32	2	NOSTIM	10	1	0
ISONEW	2015-06-12	12:44:14	42	1	NOSTIM	10	2	0
ISONEW	2015-06-12	12:44:14	35	2	NOSTIM	10	3	0
ISONEW	2015-06-12	12:44:14	4	1	NOSTIM	10	4	0
ISONEW	2015-06-12	12:44:14	53	2	NOSTIM	10	5	0
ISONEW	2015-06-12	12:44:14	6	1	NOSTIM	10	6	0
ISONEW	2015-06-12	12:44:14	39	2	NOSTIM	10	7	0
ISONEW	2015-06-12	12:44:14	8	1	NOSTIM	10	8	0
ISONEW	2015-06-12	12:44:14	32	2	P120	11	1	77
ISONEW	2015-06-12	12:44:14	42	1	P120	11	2	110
ISONEW	2015-06-12	12:44:14	35	2	P120	11	3	257
ISONEW	2015-06-12	12:44:14	4	1	P120	11	4	1470
ISONEW	2015-06-12	12:44:14	53	2	P120	11	5	96
ISONEW	2015-06-12	12:44:14	6	1	P120	11	6	1213
ISONEW	2015-06-12	12:44:14	39	2	P120	11	7	122
ISONEW	2015-06-12	12:44:14	8	1	P120	11	8	128
ISONEW	2015-06-12	12:44:14	32	2	NOSTIM	12	1	0
ISONEW	2015-06-12	12:44:14	42	1	NOSTIM	12	2	0
ISONEW	2015-06-12	12:44:14	35	2	NOSTIM	12	3	0
ISONEW	2015-06-12	12:44:14	4	1	NOSTIM	12	4	1
ISONEW	2015-06-12	12:44:14	53	2	NOSTIM	12	5	0
ISONEW	2015-06-12	12:44:14	6	1	NOSTIM	12	6	0
ISONEW	2015-06-12	12:44:14	39	2	NOSTIM	12	7	2
ISONEW	2015-06-12	12:44:14	8	1	NOSTIM	12	8	2
ISONEW	2015-06-12	12:44:14	32	2	PP6P120	13	1	91
ISONEW	2015-06-12	12:44:14	42	1	PP6P120	13	2	18
ISONEW	2015-06-12	12:44:14	35	2	PP6P120	13	3	138
ISONEW	2015-06-12	12:44:14	4	1	PP6P120	13	4	397
ISONEW	2015-06-12	12:44:14	53	2	PP6P120	13	5	296
ISONEW	2015-06-12	12:44:14	6	1	PP6P120	13	6	236
ISONEW	2015-06-12	12:44:14	39	2	PP6P120	13	7	18
ISONEW	2015-06-12	12:44:14	8	1	PP6P120	13	8	33
ISONEW	2015-06-12	12:44:14	32	2	NOSTIM	14	1	0
ISONEW	2015-06-12	12:44:14	42	1	NOSTIM	14	2	0
ISONEW	2015-06-12	12:44:14	35	2	NOSTIM	14	3	1
ISONEW	2015-06-12	12:44:14	4	1	NOSTIM	14	4	0
ISONEW	2015-06-12	12:44:14	53	2	NOSTIM	14	5	0
ISONEW	2015-06-12	12:44:14	6	1	NOSTIM	14	6	0
ISONEW	2015-06-12	12:44:14	39	2	NOSTIM	14	7	0
ISONEW	2015-06-12	12:44:14	8	1	NOSTIM	14	8	0
ISONEW	2015-06-12	12:44:14	32	2	PP12P120	15	1	139
ISONEW	2015-06-12	12:44:14	42	1	PP12P120	15	2	13
ISONEW	2015-06-12	12:44:14	35	2	PP12P120	15	3	55
ISONEW	2015-06-12	12:44:14	4	1	PP12P120	15	4	40
ISONEW	2015-06-12	12:44:14	53	2	PP12P120	15	5	45
ISONEW	2015-06-12	12:44:14	6	1	PP12P120	15	6	50
ISONEW	2015-06-12	12:44:14	39	2	PP12P120	15	7	185
ISONEW	2015-06-12	12:44:14	8	1	PP12P120	15	8	6
ISONEW	2015-06-12	12:44:14	32	2	NOSTIM	16	1	0
ISONEW	2015-06-12	12:44:14	42	1	NOSTIM	16	2	1
ISONEW	2015-06-12	12:44:14	35	2	NOSTIM	16	3	8
ISONEW	2015-06-12	12:44:14	4	1	NOSTIM	16	4	0
ISONEW	2015-06-12	12:44:14	53	2	NOSTIM	16	5	0
ISONEW	2015-06-12	12:44:14	6	1	NOSTIM	16	6	0
ISONEW	2015-06-12	12:44:14	39	2	NOSTIM	16	7	0
ISONEW	2015-06-12	12:44:14	8	1	NOSTIM	16	8	1
ISONEW	2015-06-12	12:44:14	32	2	PP3P120	17	1	48
ISONEW	2015-06-12	12:44:14	42	1	PP3P120	17	2	52
ISONEW	2015-06-12	12:44:14	35	2	PP3P120	17	3	234
ISONEW	2015-06-12	12:44:14	4	1	PP3P120	17	4	675
ISONEW	2015-06-12	12:44:14	53	2	PP3P120	17	5	420
ISONEW	2015-06-12	12:44:14	6	1	PP3P120	17	6	860
ISONEW	2015-06-12	12:44:14	39	2	PP3P120	17	7	139
ISONEW	2015-06-12	12:44:14	8	1	PP3P120	17	8	62
ISONEW	2015-06-12	12:44:14	32	2	NOSTIM	18	1	0
ISONEW	2015-06-12	12:44:14	42	1	NOSTIM	18	2	0
ISONEW	2015-06-12	12:44:14	35	2	NOSTIM	18	3	2
ISONEW	2015-06-12	12:44:14	4	1	NOSTIM	18	4	0
ISONEW	2015-06-12	12:44:14	53	2	NOSTIM	18	5	0
ISONEW	2015-06-12	12:44:14	6	1	NOSTIM	18	6	0
ISONEW	2015-06-12	12:44:14	39	2	NOSTIM	18	7	0
ISONEW	2015-06-12	12:44:14	8	1	NOSTIM	18	8	0
ISONEW	2015-06-12	12:44:14	32	2	P120	19	1	98
ISONEW	2015-06-12	12:44:14	42	1	P120	19	2	175
ISONEW	2015-06-12	12:44:14	35	2	P120	19	3	143
ISONEW	2015-06-12	12:44:14	4	1	P120	19	4	228
ISONEW	2015-06-12	12:44:14	53	2	P120	19	5	202
ISONEW	2015-06-12	12:44:14	6	1	P120	19	6	266
ISONEW	2015-06-12	12:44:14	39	2	P120	19	7	197
ISONEW	2015-06-12	12:44:14	8	1	P120	19	8	17
ISONEW	2015-06-12	12:44:14	32	2	NOSTIM	20	1	0
ISONEW	2015-06-12	12:44:14	42	1	NOSTIM	20	2	0
ISONEW	2015-06-12	12:44:14	35	2	NOSTIM	20	3	4
ISONEW	2015-06-12	12:44:14	4	1	NOSTIM	20	4	0
ISONEW	2015-06-12	12:44:14	53	2	NOSTIM	20	5	0
ISONEW	2015-06-12	12:44:14	6	1	NOSTIM	20	6	0
ISONEW	2015-06-12	12:44:14	39	2	NOSTIM	20	7	11
ISONEW	2015-06-12	12:44:14	8	1	NOSTIM	20	8	0
ISONEW	2015-06-12	12:44:14	32	2	PP6P120	21	1	45
ISONEW	2015-06-12	12:44:14	42	1	PP6P120	21	2	8
ISONEW	2015-06-12	12:44:14	35	2	PP6P120	21	3	69
ISONEW	2015-06-12	12:44:14	4	1	PP6P120	21	4	212
ISONEW	2015-06-12	12:44:14	53	2	PP6P120	21	5	102
ISONEW	2015-06-12	12:44:14	6	1	PP6P120	21	6	24
ISONEW	2015-06-12	12:44:14	39	2	PP6P120	21	7	62
ISONEW	2015-06-12	12:44:14	8	1	PP6P120	21	8	22
ISONEW	2015-06-12	12:44:14	32	2	NOSTIM	22	1	0
ISONEW	2015-06-12	12:44:14	42	1	NOSTIM	22	2	0
ISONEW	2015-06-12	12:44:14	35	2	NOSTIM	22	3	27
ISONEW	2015-06-12	12:44:14	4	1	NOSTIM	22	4	1
ISONEW	2015-06-12	12:44:14	53	2	NOSTIM	22	5	0
ISONEW	2015-06-12	12:44:14	6	1	NOSTIM	22	6	0
ISONEW	2015-06-12	12:44:14	39	2	NOSTIM	22	7	1
ISONEW	2015-06-12	12:44:14	8	1	NOSTIM	22	8	0
ISONEW	2015-06-12	12:44:14	32	2	PP3P120	23	1	138
ISONEW	2015-06-12	12:44:14	42	1	PP3P120	23	2	53
ISONEW	2015-06-12	12:44:14	35	2	PP3P120	23	3	304
ISONEW	2015-06-12	12:44:14	4	1	PP3P120	23	4	288
ISONEW	2015-06-12	12:44:14	53	2	PP3P120	23	5	111
ISONEW	2015-06-12	12:44:14	6	1	PP3P120	23	6	69
ISONEW	2015-06-12	12:44:14	39	2	PP3P120	23	7	498
ISONEW	2015-06-12	12:44:14	8	1	PP3P120	23	8	9
ISONEW	2015-06-12	12:44:14	32	2	NOSTIM	24	1	0
ISONEW	2015-06-12	12:44:14	42	1	NOSTIM	24	2	0
ISONEW	2015-06-12	12:44:14	35	2	NOSTIM	24	3	3
ISONEW	2015-06-12	12:44:14	4	1	NOSTIM	24	4	0
ISONEW	2015-06-12	12:44:14	53	2	NOSTIM	24	5	0
ISONEW	2015-06-12	12:44:14	6	1	NOSTIM	24	6	0
ISONEW	2015-06-12	12:44:14	39	2	NOSTIM	24	7	1
ISONEW	2015-06-12	12:44:14	8	1	NOSTIM	24	8	0
ISONEW	2015-06-12	12:44:14	32	2	PP6P120	25	1	187
ISONEW	2015-06-12	12:44:14	42	1	PP6P120	25	2	1
ISONEW	2015-06-12	12:44:14	35	2	PP6P120	25	3	152
ISONEW	2015-06-12	12:44:14	4	1	PP6P120	25	4	149
ISONEW	2015-06-12	12:44:14	53	2	PP6P120	25	5	198
ISONEW	2015-06-12	12:44:14	6	1	PP6P120	25	6	63
ISONEW	2015-06-12	12:44:14	39	2	PP6P120	25	7	499
ISONEW	2015-06-12	12:44:14	8	1	PP6P120	25	8	10
ISONEW	2015-06-12	12:44:14	32	2	NOSTIM	26	1	1
ISONEW	2015-06-12	12:44:14	42	1	NOSTIM	26	2	0
ISONEW	2015-06-12	12:44:14	35	2	NOSTIM	26	3	0
ISONEW	2015-06-12	12:44:14	4	1	NOSTIM	26	4	0
ISONEW	2015-06-12	12:44:14	53	2	NOSTIM	26	5	0
ISONEW	2015-06-12	12:44:14	6	1	NOSTIM	26	6	0
ISONEW	2015-06-12	12:44:14	39	2	NOSTIM	26	7	7
ISONEW	2015-06-12	12:44:14	8	1	NOSTIM	26	8	0
ISONEW	2015-06-12	12:44:14	32	2	P120	27	1	59
ISONEW	2015-06-12	12:44:14	42	1	P120	27	2	17
ISONEW	2015-06-12	12:44:14	35	2	P120	27	3	76
ISONEW	2015-06-12	12:44:14	4	1	P120	27	4	2400
ISONEW	2015-06-12	12:44:14	53	2	P120	27	5	104
ISONEW	2015-06-12	12:44:14	6	1	P120	27	6	118
ISONEW	2015-06-12	12:44:14	39	2	P120	27	7	266
ISONEW	2015-06-12	12:44:14	8	1	P120	27	8	145
ISONEW	2015-06-12	12:44:14	32	2	NOSTIM	28	1	0
ISONEW	2015-06-12	12:44:14	42	1	NOSTIM	28	2	0
ISONEW	2015-06-12	12:44:14	35	2	NOSTIM	28	3	0
ISONEW	2015-06-12	12:44:14	4	1	NOSTIM	28	4	0
ISONEW	2015-06-12	12:44:14	53	2	NOSTIM	28	5	0
ISONEW	2015-06-12	12:44:14	6	1	NOSTIM	28	6	0
ISONEW	2015-06-12	12:44:14	39	2	NOSTIM	28	7	1
ISONEW	2015-06-12	12:44:14	8	1	NOSTIM	28	8	4
ISONEW	2015-06-12	12:44:14	32	2	PP12P120	29	1	153
ISONEW	2015-06-12	12:44:14	42	1	PP12P120	29	2	3
ISONEW	2015-06-12	12:44:14	35	2	PP12P120	29	3	107
ISONEW	2015-06-12	12:44:14	4	1	PP12P120	29	4	55
ISONEW	2015-06-12	12:44:14	53	2	PP12P120	29	5	35
ISONEW	2015-06-12	12:44:14	6	1	PP12P120	29	6	73
ISONEW	2015-06-12	12:44:14	39	2	PP12P120	29	7	337
ISONEW	2015-06-12	12:44:14	8	1	PP12P120	29	8	4
ISONEW	2015-06-12	12:44:14	32	2	NOSTIM	30	1	0
ISONEW	2015-06-12	12:44:14	42	1	NOSTIM	30	2	0
ISONEW	2015-06-12	12:44:14	35	2	NOSTIM	30	3	1
ISONEW	2015-06-12	12:44:14	4	1	NOSTIM	30	4	0
ISONEW	2015-06-12	12:44:14	53	2	NOSTIM	30	5	0
ISONEW	2015-06-12	12:44:14	6	1	NOSTIM	30	6	0
ISONEW	2015-06-12	12:44:14	39	2	NOSTIM	30	7	20
ISONEW	2015-06-12	12:44:14	8	1	NOSTIM	30	8	0
ISONEW	2015-06-12	12:44:14	32	2	P120	31	1	119
ISONEW	2015-06-12	12:44:14	42	1	P120	31	2	286
ISONEW	2015-06-12	12:44:14	35	2	P120	31	3	137
ISONEW	2015-06-12	12:44:14	4	1	P120	31	4	191
ISONEW	2015-06-12	12:44:14	53	2	P120	31	5	34
ISONEW	2015-06-12	12:44:14	6	1	P120	31	6	762
ISONEW	2015-06-12	12:44:14	39	2	P120	31	7	230
ISONEW	2015-06-12	12:44:14	8	1	P120	31	8	16
ISONEW	2015-06-12	12:44:14	32	2	NOSTIM	32	1	0
ISONEW	2015-06-12	12:44:14	42	1	NOSTIM	32	2	0
ISONEW	2015-06-12	12:44:14	35	2	NOSTIM	32	3	0
ISONEW	2015-06-12	12:44:14	4	1	NOSTIM	32	4	0
ISONEW	2015-06-12	12:44:14	53	2	NOSTIM	32	5	0
ISONEW	2015-06-12	12:44:14	6	1	NOSTIM	32	6	0
ISONEW	2015-06-12	12:44:14	39	2	NOSTIM	32	7	0
ISONEW	2015-06-12	12:44:14	8	1	NOSTIM	32	8	0
ISONEW	2015-06-12	12:44:14	32	2	PP3P120	33	1	8
ISONEW	2015-06-12	12:44:14	42	1	PP3P120	33	2	26
ISONEW	2015-06-12	12:44:14	35	2	PP3P120	33	3	66
ISONEW	2015-06-12	12:44:14	4	1	PP3P120	33	4	152
ISONEW	2015-06-12	12:44:14	53	2	PP3P120	33	5	36
ISONEW	2015-06-12	12:44:14	6	1	PP3P120	33	6	62
ISONEW	2015-06-12	12:44:14	39	2	PP3P120	33	7	181
ISONEW	2015-06-12	12:44:14	8	1	PP3P120	33	8	16
ISONEW	2015-06-12	12:44:14	32	2	NOSTIM	34	1	0
ISONEW	2015-06-12	12:44:14	42	1	NOSTIM	34	2	0
ISONEW	2015-06-12	12:44:14	35	2	NOSTIM	34	3	0
ISONEW	2015-06-12	12:44:14	4	1	NOSTIM	34	4	0
ISONEW	2015-06-12	12:44:14	53	2	NOSTIM	34	5	0
ISONEW	2015-06-12	12:44:14	6	1	NOSTIM	34	6	0
ISONEW	2015-06-12	12:44:14	39	2	NOSTIM	34	7	3
ISONEW	2015-06-12	12:44:14	8	1	NOSTIM	34	8	0
ISONEW	2015-06-12	12:44:14	32	2	PP12P120	35	1	141
ISONEW	2015-06-12	12:44:14	42	1	PP12P120	35	2	0
ISONEW	2015-06-12	12:44:14	35	2	PP12P120	35	3	36
ISONEW	2015-06-12	12:44:14	4	1	PP12P120	35	4	87
ISONEW	2015-06-12	12:44:14	53	2	PP12P120	35	5	20
ISONEW	2015-06-12	12:44:14	6	1	PP12P120	35	6	40
ISONEW	2015-06-12	12:44:14	39	2	PP12P120	35	7	239
ISONEW	2015-06-12	12:44:14	8	1	PP12P120	35	8	3
ISONEW	2015-06-12	12:44:14	32	2	NOSTIM	36	1	0
ISONEW	2015-06-12	12:44:14	42	1	NOSTIM	36	2	0
ISONEW	2015-06-12	12:44:14	35	2	NOSTIM	36	3	4
ISONEW	2015-06-12	12:44:14	4	1	NOSTIM	36	4	0
ISONEW	2015-06-12	12:44:14	53	2	NOSTIM	36	5	0
ISONEW	2015-06-12	12:44:14	6	1	NOSTIM	36	6	0
ISONEW	2015-06-12	12:44:14	39	2	NOSTIM	36	7	0
ISONEW	2015-06-12	12:44:14	8	1	NOSTIM	36	8	0
ISONEW	2015-06-12	12:44:14	32	2	PP3P120	37	1	39
ISONEW	2015-06-12	12:44:14	42	1	PP3P120	37	2	29
ISONEW	2015-06-12	12:44:14	35	2	PP3P120	37	3	113
ISONEW	2015-06-12	12:44:14	4	1	PP3P120	37	4	1226
ISONEW	2015-06-12	12:44:14	53	2	PP3P120	37	5	67
ISONEW	2015-06-12	12:44:14	6	1	PP3P120	37	6	203
ISONEW	2015-06-12	12:44:14	39	2	PP3P120	37	7	75
ISONEW	2015-06-12	12:44:14	8	1	PP3P120	37	8	79
ISONEW	2015-06-12	12:44:14	32	2	NOSTIM	38	1	0
ISONEW	2015-06-12	12:44:14	42	1	NOSTIM	38	2	0
ISONEW	2015-06-12	12:44:14	35	2	NOSTIM	38	3	1
ISONEW	2015-06-12	12:44:14	4	1	NOSTIM	38	4	0
ISONEW	2015-06-12	12:44:14	53	2	NOSTIM	38	5	0
ISONEW	2015-06-12	12:44:14	6	1	NOSTIM	38	6	0
ISONEW	2015-06-12	12:44:14	39	2	NOSTIM	38	7	12
ISONEW	2015-06-12	12:44:14	8	1	NOSTIM	38	8	0
ISONEW	2015-06-12	12:44:14	32	2	PP12P120	39	1	45
ISONEW	2015-06-12	12:44:14	42	1	PP12P120	39	2	1
ISONEW	2015-06-12	12:44:14	35	2	PP12P120	39	3	39
ISONEW	2015-06-12	12:44:14	4	1	PP12P120	39	4	35
ISONEW	2015-06-12	12:44:14	53	2	PP12P120	39	5	135
ISONEW	2015-06-12	12:44:14	6	1	PP12P120	39	6	43
ISONEW	2015-06-12	12:44:14	39	2	PP12P120	39	7	71
ISONEW	2015-06-12	12:44:14	8	1	PP12P120	39	8	0
ISONEW	2015-06-12	12:44:14	32	2	NOSTIM	40	1	0
ISONEW	2015-06-12	12:44:14	42	1	NOSTIM	40	2	0
ISONEW	2015-06-12	12:44:14	35	2	NOSTIM	40	3	0
ISONEW	2015-06-12	12:44:14	4	1	NOSTIM	40	4	1
ISONEW	2015-06-12	12:44:14	53	2	NOSTIM	40	5	0
ISONEW	2015-06-12	12:44:14	6	1	NOSTIM	40	6	0
ISONEW	2015-06-12	12:44:14	39	2	NOSTIM	40	7	0
ISONEW	2015-06-12	12:44:14	8	1	NOSTIM	40	8	6
ISONEW	2015-06-12	12:44:14	32	2	PP6P120	41	1	34
ISONEW	2015-06-12	12:44:14	42	1	PP6P120	41	2	3
ISONEW	2015-06-12	12:44:14	35	2	PP6P120	41	3	34
ISONEW	2015-06-12	12:44:14	4	1	PP6P120	41	4	274
ISONEW	2015-06-12	12:44:14	53	2	PP6P120	41	5	188
ISONEW	2015-06-12	12:44:14	6	1	PP6P120	41	6	85
ISONEW	2015-06-12	12:44:14	39	2	PP6P120	41	7	107
ISONEW	2015-06-12	12:44:14	8	1	PP6P120	41	8	3
ISONEW	2015-06-12	12:44:14	32	2	NOSTIM	42	1	0
ISONEW	2015-06-12	12:44:14	42	1	NOSTIM	42	2	0
ISONEW	2015-06-12	12:44:14	35	2	NOSTIM	42	3	1
ISONEW	2015-06-12	12:44:14	4	1	NOSTIM	42	4	4
ISONEW	2015-06-12	12:44:14	53	2	NOSTIM	42	5	0
ISONEW	2015-06-12	12:44:14	6	1	NOSTIM	42	6	0
ISONEW	2015-06-12	12:44:14	39	2	NOSTIM	42	7	11
ISONEW	2015-06-12	12:44:14	8	1	NOSTIM	42	8	3
ISONEW	2015-06-12	12:44:14	32	2	P120	43	1	59
ISONEW	2015-06-12	12:44:14	42	1	P120	43	2	27
ISONEW	2015-06-12	12:44:14	35	2	P120	43	3	38
ISONEW	2015-06-12	12:44:14	4	1	P120	43	4	63
ISONEW	2015-06-12	12:44:14	53	2	P120	43	5	159
ISONEW	2015-06-12	12:44:14	6	1	P120	43	6	141
ISONEW	2015-06-12	12:44:14	39	2	P120	43	7	139
ISONEW	2015-06-12	12:44:14	8	1	P120	43	8	16
ISONEW	2015-06-12	12:44:14	32	2	NOSTIM	44	1	1
ISONEW	2015-06-12	12:44:14	42	1	NOSTIM	44	2	0
ISONEW	2015-06-12	12:44:14	35	2	NOSTIM	44	3	0
ISONEW	2015-06-12	12:44:14	4	1	NOSTIM	44	4	0
ISONEW	2015-06-12	12:44:14	53	2	NOSTIM	44	5	0
ISONEW	2015-06-12	12:44:14	6	1	NOSTIM	44	6	0
ISONEW	2015-06-12	12:44:14	39	2	NOSTIM	44	7	13
ISONEW	2015-06-12	12:44:14	8	1	NOSTIM	44	8	0
ISONEW	2015-06-12	12:44:14	32	2	PP3P120	45	1	138
ISONEW	2015-06-12	12:44:14	42	1	PP3P120	45	2	5
ISONEW	2015-06-12	12:44:14	35	2	PP3P120	45	3	26
ISONEW	2015-06-12	12:44:14	4	1	PP3P120	45	4	182
ISONEW	2015-06-12	12:44:14	53	2	PP3P120	45	5	518
ISONEW	2015-06-12	12:44:14	6	1	PP3P120	45	6	67
ISONEW	2015-06-12	12:44:14	39	2	PP3P120	45	7	77
ISONEW	2015-06-12	12:44:14	8	1	PP3P120	45	8	24
ISONEW	2015-06-12	12:44:14	32	2	NOSTIM	46	1	4
ISONEW	2015-06-12	12:44:14	42	1	NOSTIM	46	2	0
ISONEW	2015-06-12	12:44:14	35	2	NOSTIM	46	3	0
ISONEW	2015-06-12	12:44:14	4	1	NOSTIM	46	4	0
ISONEW	2015-06-12	12:44:14	53	2	NOSTIM	46	5	0
ISONEW	2015-06-12	12:44:14	6	1	NOSTIM	46	6	0
ISONEW	2015-06-12	12:44:14	39	2	NOSTIM	46	7	0
ISONEW	2015-06-12	12:44:14	8	1	NOSTIM	46	8	0
ISONEW	2015-06-12	12:44:14	32	2	PP12P120	47	1	52
ISONEW	2015-06-12	12:44:14	42	1	PP12P120	47	2	1
ISONEW	2015-06-12	12:44:14	35	2	PP12P120	47	3	60
ISONEW	2015-06-12	12:44:14	4	1	PP12P120	47	4	9
ISONEW	2015-06-12	12:44:14	53	2	PP12P120	47	5	94
ISONEW	2015-06-12	12:44:14	6	1	PP12P120	47	6	63
ISONEW	2015-06-12	12:44:14	39	2	PP12P120	47	7	76
ISONEW	2015-06-12	12:44:14	8	1	PP12P120	47	8	6
ISONEW	2015-06-12	12:44:14	32	2	NOSTIM	48	1	4
ISONEW	2015-06-12	12:44:14	42	1	NOSTIM	48	2	0
ISONEW	2015-06-12	12:44:14	35	2	NOSTIM	48	3	0
ISONEW	2015-06-12	12:44:14	4	1	NOSTIM	48	4	0
ISONEW	2015-06-12	12:44:14	53	2	NOSTIM	48	5	0
ISONEW	2015-06-12	12:44:14	6	1	NOSTIM	48	6	0
ISONEW	2015-06-12	12:44:14	39	2	NOSTIM	48	7	14
ISONEW	2015-06-12	12:44:14	8	1	NOSTIM	48	8	0
ISONEW	2015-06-12	12:44:14	32	2	PP6P120	49	1	103
ISONEW	2015-06-12	12:44:14	42	1	PP6P120	49	2	2
ISONEW	2015-06-12	12:44:14	35	2	PP6P120	49	3	48
ISONEW	2015-06-12	12:44:14	4	1	PP6P120	49	4	104
ISONEW	2015-06-12	12:44:14	53	2	PP6P120	49	5	100
ISONEW	2015-06-12	12:44:14	6	1	PP6P120	49	6	40
ISONEW	2015-06-12	12:44:14	39	2	PP6P120	49	7	113
ISONEW	2015-06-12	12:44:14	8	1	PP6P120	49	8	4
ISONEW	2015-06-12	12:44:14	32	2	NOSTIM	50	1	0
ISONEW	2015-06-12	12:44:14	42	1	NOSTIM	50	2	0
ISONEW	2015-06-12	12:44:14	35	2	NOSTIM	50	3	0
ISONEW	2015-06-12	12:44:14	4	1	NOSTIM	50	4	0
ISONEW	2015-06-12	12:44:14	53	2	NOSTIM	50	5	0
ISONEW	2015-06-12	12:44:14	6	1	NOSTIM	50	6	0
ISONEW	2015-06-12	12:44:14	39	2	NOSTIM	50	7	0
ISONEW	2015-06-12	12:44:14	8	1	NOSTIM	50	8	0
ISONEW	2015-06-12	12:44:14	32	2	P120	51	1	68
ISONEW	2015-06-12	12:44:14	42	1	P120	51	2	114
ISONEW	2015-06-12	12:44:14	35	2	P120	51	3	16
ISONEW	2015-06-12	12:44:14	4	1	P120	51	4	99
ISONEW	2015-06-12	12:44:14	53	2	P120	51	5	110
ISONEW	2015-06-12	12:44:14	6	1	P120	51	6	168
ISONEW	2015-06-12	12:44:14	39	2	P120	51	7	182
ISONEW	2015-06-12	12:44:14	8	1	P120	51	8	4
ISONEW	2015-06-12	12:44:14	32	2	NOSTIM	52	1	0
ISONEW	2015-06-12	12:44:14	42	1	NOSTIM	52	2	0
ISONEW	2015-06-12	12:44:14	35	2	NOSTIM	52	3	0
ISONEW	2015-06-12	12:44:14	4	1	NOSTIM	52	4	0
ISONEW	2015-06-12	12:44:14	53	2	NOSTIM	52	5	0
ISONEW	2015-06-12	12:44:14	6	1	NOSTIM	52	6	0
ISONEW	2015-06-12	12:44:14	39	2	NOSTIM	52	7	0
ISONEW	2015-06-12	12:44:14	8	1	NOSTIM	52	8	0
ISONEW	2015-06-12	12:44:14	32	2	PP3P120	53	1	345
ISONEW	2015-06-12	12:44:14	42	1	PP3P120	53	2	21
ISONEW	2015-06-12	12:44:14	35	2	PP3P120	53	3	75
ISONEW	2015-06-12	12:44:14	4	1	PP3P120	53	4	99
ISONEW	2015-06-12	12:44:14	53	2	PP3P120	53	5	73
ISONEW	2015-06-12	12:44:14	6	1	PP3P120	53	6	37
ISONEW	2015-06-12	12:44:14	39	2	PP3P120	53	7	113
ISONEW	2015-06-12	12:44:14	8	1	PP3P120	53	8	4
ISONEW	2015-06-12	12:44:14	32	2	NOSTIM	54	1	0
ISONEW	2015-06-12	12:44:14	42	1	NOSTIM	54	2	0
ISONEW	2015-06-12	12:44:14	35	2	NOSTIM	54	3	1
ISONEW	2015-06-12	12:44:14	4	1	NOSTIM	54	4	0
ISONEW	2015-06-12	12:44:14	53	2	NOSTIM	54	5	0
ISONEW	2015-06-12	12:44:14	6	1	NOSTIM	54	6	0
ISONEW	2015-06-12	12:44:14	39	2	NOSTIM	54	7	0
ISONEW	2015-06-12	12:44:14	8	1	NOSTIM	54	8	0
ISONEW	2015-06-12	12:44:14	32	2	PP12P120	55	1	106
ISONEW	2015-06-12	12:44:14	42	1	PP12P120	55	2	0
ISONEW	2015-06-12	12:44:14	35	2	PP12P120	55	3	60
ISONEW	2015-06-12	12:44:14	4	1	PP12P120	55	4	76
ISONEW	2015-06-12	12:44:14	53	2	PP12P120	55	5	21
ISONEW	2015-06-12	12:44:14	6	1	PP12P120	55	6	34
ISONEW	2015-06-12	12:44:14	39	2	PP12P120	55	7	96
ISONEW	2015-06-12	12:44:14	8	1	PP12P120	55	8	0
ISONEW	2015-06-12	12:44:14	32	2	NOSTIM	56	1	0
ISONEW	2015-06-12	12:44:14	42	1	NOSTIM	56	2	0
ISONEW	2015-06-12	12:44:14	35	2	NOSTIM	56	3	8
ISONEW	2015-06-12	12:44:14	4	1	NOSTIM	56	4	0
ISONEW	2015-06-12	12:44:14	53	2	NOSTIM	56	5	0
ISONEW	2015-06-12	12:44:14	6	1	NOSTIM	56	6	0
ISONEW	2015-06-12	12:44:14	39	2	NOSTIM	56	7	0
ISONEW	2015-06-12	12:44:14	8	1	NOSTIM	56	8	16
ISONEW	2015-06-12	12:44:14	32	2	P120	57	1	41
ISONEW	2015-06-12	12:44:14	42	1	P120	57	2	131
ISONEW	2015-06-12	12:44:14	35	2	P120	57	3	97
ISONEW	2015-06-12	12:44:14	4	1	P120	57	4	797
ISONEW	2015-06-12	12:44:14	53	2	P120	57	5	48
ISONEW	2015-06-12	12:44:14	6	1	P120	57	6	47
ISONEW	2015-06-12	12:44:14	39	2	P120	57	7	78
ISONEW	2015-06-12	12:44:14	8	1	P120	57	8	72
ISONEW	2015-06-12	12:44:14	32	2	NOSTIM	58	1	0
ISONEW	2015-06-12	12:44:14	42	1	NOSTIM	58	2	0
ISONEW	2015-06-12	12:44:14	35	2	NOSTIM	58	3	5
ISONEW	2015-06-12	12:44:14	4	1	NOSTIM	58	4	0
ISONEW	2015-06-12	12:44:14	53	2	NOSTIM	58	5	0
ISONEW	2015-06-12	12:44:14	6	1	NOSTIM	58	6	0
ISONEW	2015-06-12	12:44:14	39	2	NOSTIM	58	7	6
ISONEW	2015-06-12	12:44:14	8	1	NOSTIM	58	8	0
ISONEW	2015-06-12	12:44:14	32	2	PP6P120	59	1	21
ISONEW	2015-06-12	12:44:14	42	1	PP6P120	59	2	1
ISONEW	2015-06-12	12:44:14	35	2	PP6P120	59	3	65
ISONEW	2015-06-12	12:44:14	4	1	PP6P120	59	4	130
ISONEW	2015-06-12	12:44:14	53	2	PP6P120	59	5	38
ISONEW	2015-06-12	12:44:14	6	1	PP6P120	59	6	26
ISONEW	2015-06-12	12:44:14	39	2	PP6P120	59	7	38
ISONEW	2015-06-12	12:44:14	8	1	PP6P120	59	8	11
ISONEW	2015-06-12	12:44:14	32	2	NOSTIM	60	1	0
ISONEW	2015-06-12	12:44:14	42	1	NOSTIM	60	2	0
ISONEW	2015-06-12	12:44:14	35	2	NOSTIM	60	3	7
ISONEW	2015-06-12	12:44:14	4	1	NOSTIM	60	4	0
ISONEW	2015-06-12	12:44:14	53	2	NOSTIM	60	5	0
ISONEW	2015-06-12	12:44:14	6	1	NOSTIM	60	6	0
ISONEW	2015-06-12	12:44:14	39	2	NOSTIM	60	7	2
ISONEW	2015-06-12	12:44:14	8	1	NOSTIM	60	8	0
ISONEW	2015-06-12	12:44:14	32	2	PP6P120	61	1	79
ISONEW	2015-06-12	12:44:14	42	1	PP6P120	61	2	0
ISONEW	2015-06-12	12:44:14	35	2	PP6P120	61	3	25
ISONEW	2015-06-12	12:44:14	4	1	PP6P120	61	4	415
ISONEW	2015-06-12	12:44:14	53	2	PP6P120	61	5	39
ISONEW	2015-06-12	12:44:14	6	1	PP6P120	61	6	41
ISONEW	2015-06-12	12:44:14	39	2	PP6P120	61	7	38
ISONEW	2015-06-12	12:44:14	8	1	PP6P120	61	8	12
ISONEW	2015-06-12	12:44:14	32	2	NOSTIM	62	1	0
ISONEW	2015-06-12	12:44:14	42	1	NOSTIM	62	2	0
ISONEW	2015-06-12	12:44:14	35	2	NOSTIM	62	3	0
ISONEW	2015-06-12	12:44:14	4	1	NOSTIM	62	4	0
ISONEW	2015-06-12	12:44:14	53	2	NOSTIM	62	5	0
ISONEW	2015-06-12	12:44:14	6	1	NOSTIM	62	6	0
ISONEW	2015-06-12	12:44:14	39	2	NOSTIM	62	7	7
ISONEW	2015-06-12	12:44:14	8	1	NOSTIM	62	8	5
ISONEW	2015-06-12	12:44:14	32	2	PP12P120	63	1	4
ISONEW	2015-06-12	12:44:14	42	1	PP12P120	63	2	0
ISONEW	2015-06-12	12:44:14	35	2	PP12P120	63	3	89
ISONEW	2015-06-12	12:44:14	4	1	PP12P120	63	4	222
ISONEW	2015-06-12	12:44:14	53	2	PP12P120	63	5	71
ISONEW	2015-06-12	12:44:14	6	1	PP12P120	63	6	24
ISONEW	2015-06-12	12:44:14	39	2	PP12P120	63	7	185
ISONEW	2015-06-12	12:44:14	8	1	PP12P120	63	8	11
ISONEW	2015-06-12	12:44:14	32	2	NOSTIM	64	1	0
ISONEW	2015-06-12	12:44:14	42	1	NOSTIM	64	2	0
ISONEW	2015-06-12	12:44:14	35	2	NOSTIM	64	3	0
ISONEW	2015-06-12	12:44:14	4	1	NOSTIM	64	4	0
ISONEW	2015-06-12	12:44:14	53	2	NOSTIM	64	5	0
ISONEW	2015-06-12	12:44:14	6	1	NOSTIM	64	6	0
ISONEW	2015-06-12	12:44:14	39	2	NOSTIM	64	7	0
ISONEW	2015-06-12	12:44:14	8	1	NOSTIM	64	8	1
ISONEW	2015-06-12	12:44:14	32	2	PP3P120	65	1	9
ISONEW	2015-06-12	12:44:14	42	1	PP3P120	65	2	14
ISONEW	2015-06-12	12:44:14	35	2	PP3P120	65	3	30
ISONEW	2015-06-12	12:44:14	4	1	PP3P120	65	4	152
ISONEW	2015-06-12	12:44:14	53	2	PP3P120	65	5	161
ISONEW	2015-06-12	12:44:14	6	1	PP3P120	65	6	32
ISONEW	2015-06-12	12:44:14	39	2	PP3P120	65	7	39
ISONEW	2015-06-12	12:44:14	8	1	PP3P120	65	8	41
ISONEW	2015-06-12	12:44:14	32	2	NOSTIM	66	1	0
ISONEW	2015-06-12	12:44:14	42	1	NOSTIM	66	2	0
ISONEW	2015-06-12	12:44:14	35	2	NOSTIM	66	3	0
ISONEW	2015-06-12	12:44:14	4	1	NOSTIM	66	4	0
ISONEW	2015-06-12	12:44:14	53	2	NOSTIM	66	5	0
ISONEW	2015-06-12	12:44:14	6	1	NOSTIM	66	6	0
ISONEW	2015-06-12	12:44:14	39	2	NOSTIM	66	7	0
ISONEW	2015-06-12	12:44:14	8	1	NOSTIM	66	8	1
ISONEW	2015-06-12	12:44:14	32	2	P120	67	1	31
ISONEW	2015-06-12	12:44:14	42	1	P120	67	2	3
ISONEW	2015-06-12	12:44:14	35	2	P120	67	3	57
ISONEW	2015-06-12	12:44:14	4	1	P120	67	4	426
ISONEW	2015-06-12	12:44:14	53	2	P120	67	5	62
ISONEW	2015-06-12	12:44:14	6	1	P120	67	6	42
ISONEW	2015-06-12	12:44:14	39	2	P120	67	7	61
ISONEW	2015-06-12	12:44:14	8	1	P120	67	8	70
ISONEW	2015-06-12	12:44:14	32	2	NOSTIM	68	1	0
ISONEW	2015-06-12	12:44:14	42	1	NOSTIM	68	2	0
ISONEW	2015-06-12	12:44:14	35	2	NOSTIM	68	3	0
ISONEW	2015-06-12	12:44:14	4	1	NOSTIM	68	4	0
ISONEW	2015-06-12	12:44:14	53	2	NOSTIM	68	5	0
ISONEW	2015-06-12	12:44:14	6	1	NOSTIM	68	6	0
ISONEW	2015-06-12	12:44:14	39	2	NOSTIM	68	7	1
ISONEW	2015-06-12	12:44:14	8	1	NOSTIM	68	8	0
ISONEW	2015-06-12	12:44:14	32	2	PP6P120	69	1	21
ISONEW	2015-06-12	12:44:14	42	1	PP6P120	69	2	2
ISONEW	2015-06-12	12:44:14	35	2	PP6P120	69	3	13
ISONEW	2015-06-12	12:44:14	4	1	PP6P120	69	4	67
ISONEW	2015-06-12	12:44:14	53	2	PP6P120	69	5	16
ISONEW	2015-06-12	12:44:14	6	1	PP6P120	69	6	5
ISONEW	2015-06-12	12:44:14	39	2	PP6P120	69	7	113
ISONEW	2015-06-12	12:44:14	8	1	PP6P120	69	8	11
ISONEW	2015-06-12	12:44:14	32	2	NOSTIM	70	1	0
ISONEW	2015-06-12	12:44:14	42	1	NOSTIM	70	2	0
ISONEW	2015-06-12	12:44:14	35	2	NOSTIM	70	3	0
ISONEW	2015-06-12	12:44:14	4	1	NOSTIM	70	4	2
ISONEW	2015-06-12	12:44:14	53	2	NOSTIM	70	5	0
ISONEW	2015-06-12	12:44:14	6	1	NOSTIM	70	6	0
ISONEW	2015-06-12	12:44:14	39	2	NOSTIM	70	7	20
ISONEW	2015-06-12	12:44:14	8	1	NOSTIM	70	8	0
ISONEW	2015-06-12	12:44:14	32	2	PP3P120	71	1	3
ISONEW	2015-06-12	12:44:14	42	1	PP3P120	71	2	20
ISONEW	2015-06-12	12:44:14	35	2	PP3P120	71	3	38
ISONEW	2015-06-12	12:44:14	4	1	PP3P120	71	4	58
ISONEW	2015-06-12	12:44:14	53	2	PP3P120	71	5	33
ISONEW	2015-06-12	12:44:14	6	1	PP3P120	71	6	36
ISONEW	2015-06-12	12:44:14	39	2	PP3P120	71	7	166
ISONEW	2015-06-12	12:44:14	8	1	PP3P120	71	8	56
ISONEW	2015-06-12	12:44:14	32	2	NOSTIM	72	1	0
ISONEW	2015-06-12	12:44:14	42	1	NOSTIM	72	2	0
ISONEW	2015-06-12	12:44:14	35	2	NOSTIM	72	3	5
ISONEW	2015-06-12	12:44:14	4	1	NOSTIM	72	4	0
ISONEW	2015-06-12	12:44:14	53	2	NOSTIM	72	5	0
ISONEW	2015-06-12	12:44:14	6	1	NOSTIM	72	6	0
ISONEW	2015-06-12	12:44:14	39	2	NOSTIM	72	7	0
ISONEW	2015-06-12	12:44:14	8	1	NOSTIM	72	8	0
ISONEW	2015-06-12	12:44:14	32	2	PP6P120	73	1	42
ISONEW	2015-06-12	12:44:14	42	1	PP6P120	73	2	1
ISONEW	2015-06-12	12:44:14	35	2	PP6P120	73	3	58
ISONEW	2015-06-12	12:44:14	4	1	PP6P120	73	4	228
ISONEW	2015-06-12	12:44:14	53	2	PP6P120	73	5	73
ISONEW	2015-06-12	12:44:14	6	1	PP6P120	73	6	22
ISONEW	2015-06-12	12:44:14	39	2	PP6P120	73	7	153
ISONEW	2015-06-12	12:44:14	8	1	PP6P120	73	8	16
ISONEW	2015-06-12	12:44:14	32	2	NOSTIM	74	1	5
ISONEW	2015-06-12	12:44:14	42	1	NOSTIM	74	2	0
ISONEW	2015-06-12	12:44:14	35	2	NOSTIM	74	3	0
ISONEW	2015-06-12	12:44:14	4	1	NOSTIM	74	4	0
ISONEW	2015-06-12	12:44:14	53	2	NOSTIM	74	5	0
ISONEW	2015-06-12	12:44:14	6	1	NOSTIM	74	6	0
ISONEW	2015-06-12	12:44:14	39	2	NOSTIM	74	7	1
ISONEW	2015-06-12	12:44:14	8	1	NOSTIM	74	8	0
ISONEW	2015-06-12	12:44:14	32	2	P120	75	1	81
ISONEW	2015-06-12	12:44:14	42	1	P120	75	2	164
ISONEW	2015-06-12	12:44:14	35	2	P120	75	3	70
ISONEW	2015-06-12	12:44:14	4	1	P120	75	4	225
ISONEW	2015-06-12	12:44:14	53	2	P120	75	5	71
ISONEW	2015-06-12	12:44:14	6	1	P120	75	6	30
ISONEW	2015-06-12	12:44:14	39	2	P120	75	7	63
ISONEW	2015-06-12	12:44:14	8	1	P120	75	8	61
ISONEW	2015-06-12	12:44:14	32	2	NOSTIM	76	1	0
ISONEW	2015-06-12	12:44:14	42	1	NOSTIM	76	2	0
ISONEW	2015-06-12	12:44:14	35	2	NOSTIM	76	3	0
ISONEW	2015-06-12	12:44:14	4	1	NOSTIM	76	4	1
ISONEW	2015-06-12	12:44:14	53	2	NOSTIM	76	5	0
ISONEW	2015-06-12	12:44:14	6	1	NOSTIM	76	6	0
ISONEW	2015-06-12	12:44:14	39	2	NOSTIM	76	7	0
ISONEW	2015-06-12	12:44:14	8	1	NOSTIM	76	8	5
ISONEW	2015-06-12	12:44:14	32	2	PP12P120	77	1	88
ISONEW	2015-06-12	12:44:14	42	1	PP12P120	77	2	4
ISONEW	2015-06-12	12:44:14	35	2	PP12P120	77	3	29
ISONEW	2015-06-12	12:44:14	4	1	PP12P120	77	4	43
ISONEW	2015-06-12	12:44:14	53	2	PP12P120	77	5	10
ISONEW	2015-06-12	12:44:14	6	1	PP12P120	77	6	74
ISONEW	2015-06-12	12:44:14	39	2	PP12P120	77	7	38
ISONEW	2015-06-12	12:44:14	8	1	PP12P120	77	8	13
ISONEW	2015-06-12	12:44:14	32	2	NOSTIM	78	1	0
ISONEW	2015-06-12	12:44:14	42	1	NOSTIM	78	2	0
ISONEW	2015-06-12	12:44:14	35	2	NOSTIM	78	3	1
ISONEW	2015-06-12	12:44:14	4	1	NOSTIM	78	4	0
ISONEW	2015-06-12	12:44:14	53	2	NOSTIM	78	5	0
ISONEW	2015-06-12	12:44:14	6	1	NOSTIM	78	6	0
ISONEW	2015-06-12	12:44:14	39	2	NOSTIM	78	7	4
ISONEW	2015-06-12	12:44:14	8	1	NOSTIM	78	8	0
ISONEW	2015-06-12	12:44:14	32	2	P120	79	1	59
ISONEW	2015-06-12	12:44:14	42	1	P120	79	2	113
ISONEW	2015-06-12	12:44:14	35	2	P120	79	3	10
ISONEW	2015-06-12	12:44:14	4	1	P120	79	4	555
ISONEW	2015-06-12	12:44:14	53	2	P120	79	5	11
ISONEW	2015-06-12	12:44:14	6	1	P120	79	6	334
ISONEW	2015-06-12	12:44:14	39	2	P120	79	7	144
ISONEW	2015-06-12	12:44:14	8	1	P120	79	8	115
ISONEW	2015-06-12	12:44:14	32	2	NOSTIM	80	1	0
ISONEW	2015-06-12	12:44:14	42	1	NOSTIM	80	2	0
ISONEW	2015-06-12	12:44:14	35	2	NOSTIM	80	3	0
ISONEW	2015-06-12	12:44:14	4	1	NOSTIM	80	4	0
ISONEW	2015-06-12	12:44:14	53	2	NOSTIM	80	5	0
ISONEW	2015-06-12	12:44:14	6	1	NOSTIM	80	6	0
ISONEW	2015-06-12	12:44:14	39	2	NOSTIM	80	7	0
ISONEW	2015-06-12	12:44:14	8	1	NOSTIM	80	8	0
ISONEW	2015-06-12	12:44:14	32	2	PP3P120	81	1	0
ISONEW	2015-06-12	12:44:14	42	1	PP3P120	81	2	29
ISONEW	2015-06-12	12:44:14	35	2	PP3P120	81	3	73
ISONEW	2015-06-12	12:44:14	4	1	PP3P120	81	4	114
ISONEW	2015-06-12	12:44:14	53	2	PP3P120	81	5	67
ISONEW	2015-06-12	12:44:14	6	1	PP3P120	81	6	77
ISONEW	2015-06-12	12:44:14	39	2	PP3P120	81	7	10
ISONEW	2015-06-12	12:44:14	8	1	PP3P120	81	8	57
ISONEW	2015-06-12	12:44:14	32	2	NOSTIM	82	1	1
ISONEW	2015-06-12	12:44:14	42	1	NOSTIM	82	2	0
ISONEW	2015-06-12	12:44:14	35	2	NOSTIM	82	3	29
ISONEW	2015-06-12	12:44:14	4	1	NOSTIM	82	4	0
ISONEW	2015-06-12	12:44:14	53	2	NOSTIM	82	5	0
ISONEW	2015-06-12	12:44:14	6	1	NOSTIM	82	6	0
ISONEW	2015-06-12	12:44:14	39	2	NOSTIM	82	7	0
ISONEW	2015-06-12	12:44:14	8	1	NOSTIM	82	8	0
ISONEW	2015-06-12	12:44:14	32	2	PP12P120	83	1	17
ISONEW	2015-06-12	12:44:14	42	1	PP12P120	83	2	10
ISONEW	2015-06-12	12:44:14	35	2	PP12P120	83	3	57
ISONEW	2015-06-12	12:44:14	4	1	PP12P120	83	4	38
ISONEW	2015-06-12	12:44:14	53	2	PP12P120	83	5	23
ISONEW	2015-06-12	12:44:14	6	1	PP12P120	83	6	12
ISONEW	2015-06-12	12:44:14	39	2	PP12P120	83	7	25
ISONEW	2015-06-12	12:44:14	8	1	PP12P120	83	8	4
ISONEW	2015-06-12	12:44:14	32	2	NOSTIM	84	1	0
ISONEW	2015-06-12	12:44:14	42	1	NOSTIM	84	2	0
ISONEW	2015-06-12	12:44:14	35	2	NOSTIM	84	3	24
ISONEW	2015-06-12	12:44:14	4	1	NOSTIM	84	4	0
ISONEW	2015-06-12	12:44:14	53	2	NOSTIM	84	5	0
ISONEW	2015-06-12	12:44:14	6	1	NOSTIM	84	6	0
ISONEW	2015-06-12	12:44:14	39	2	NOSTIM	84	7	3
ISONEW	2015-06-12	12:44:14	8	1	NOSTIM	84	8	0
ISONEW	2015-06-12	12:44:14	32	2	PP3P120	85	1	105
ISONEW	2015-06-12	12:44:14	42	1	PP3P120	85	2	28
ISONEW	2015-06-12	12:44:14	35	2	PP3P120	85	3	158
ISONEW	2015-06-12	12:44:14	4	1	PP3P120	85	4	185
ISONEW	2015-06-12	12:44:14	53	2	PP3P120	85	5	189
ISONEW	2015-06-12	12:44:14	6	1	PP3P120	85	6	90
ISONEW	2015-06-12	12:44:14	39	2	PP3P120	85	7	108
ISONEW	2015-06-12	12:44:14	8	1	PP3P120	85	8	211
ISONEW	2015-06-12	12:44:14	32	2	NOSTIM	86	1	0
ISONEW	2015-06-12	12:44:14	42	1	NOSTIM	86	2	0
ISONEW	2015-06-12	12:44:14	35	2	NOSTIM	86	3	0
ISONEW	2015-06-12	12:44:14	4	1	NOSTIM	86	4	0
ISONEW	2015-06-12	12:44:14	53	2	NOSTIM	86	5	2
ISONEW	2015-06-12	12:44:14	6	1	NOSTIM	86	6	0
ISONEW	2015-06-12	12:44:14	39	2	NOSTIM	86	7	3
ISONEW	2015-06-12	12:44:14	8	1	NOSTIM	86	8	0
ISONEW	2015-06-12	12:44:14	32	2	PP12P120	87	1	45
ISONEW	2015-06-12	12:44:14	42	1	PP12P120	87	2	0
ISONEW	2015-06-12	12:44:14	35	2	PP12P120	87	3	9
ISONEW	2015-06-12	12:44:14	4	1	PP12P120	87	4	71
ISONEW	2015-06-12	12:44:14	53	2	PP12P120	87	5	28
ISONEW	2015-06-12	12:44:14	6	1	PP12P120	87	6	17
ISONEW	2015-06-12	12:44:14	39	2	PP12P120	87	7	118
ISONEW	2015-06-12	12:44:14	8	1	PP12P120	87	8	10
ISONEW	2015-06-12	12:44:14	32	2	NOSTIM	88	1	0
ISONEW	2015-06-12	12:44:14	42	1	NOSTIM	88	2	0
ISONEW	2015-06-12	12:44:14	35	2	NOSTIM	88	3	7
ISONEW	2015-06-12	12:44:14	4	1	NOSTIM	88	4	0
ISONEW	2015-06-12	12:44:14	53	2	NOSTIM	88	5	0
ISONEW	2015-06-12	12:44:14	6	1	NOSTIM	88	6	0
ISONEW	2015-06-12	12:44:14	39	2	NOSTIM	88	7	0
ISONEW	2015-06-12	12:44:14	8	1	NOSTIM	88	8	0
ISONEW	2015-06-12	12:44:14	32	2	PP6P120	89	1	61
ISONEW	2015-06-12	12:44:14	42	1	PP6P120	89	2	121
ISONEW	2015-06-12	12:44:14	35	2	PP6P120	89	3	12
ISONEW	2015-06-12	12:44:14	4	1	PP6P120	89	4	145
ISONEW	2015-06-12	12:44:14	53	2	PP6P120	89	5	22
ISONEW	2015-06-12	12:44:14	6	1	PP6P120	89	6	22
ISONEW	2015-06-12	12:44:14	39	2	PP6P120	89	7	172
ISONEW	2015-06-12	12:44:14	8	1	PP6P120	89	8	23
ISONEW	2015-06-12	12:44:14	32	2	NOSTIM	90	1	0
ISONEW	2015-06-12	12:44:14	42	1	NOSTIM	90	2	0
ISONEW	2015-06-12	12:44:14	35	2	NOSTIM	90	3	2
ISONEW	2015-06-12	12:44:14	4	1	NOSTIM	90	4	3
ISONEW	2015-06-12	12:44:14	53	2	NOSTIM	90	5	5
ISONEW	2015-06-12	12:44:14	6	1	NOSTIM	90	6	0
ISONEW	2015-06-12	12:44:14	39	2	NOSTIM	90	7	5
ISONEW	2015-06-12	12:44:14	8	1	NOSTIM	90	8	0
ISONEW	2015-06-12	12:44:14	32	2	P120	91	1	70
ISONEW	2015-06-12	12:44:14	42	1	P120	91	2	210
ISONEW	2015-06-12	12:44:14	35	2	P120	91	3	73
ISONEW	2015-06-12	12:44:14	4	1	P120	91	4	154
ISONEW	2015-06-12	12:44:14	53	2	P120	91	5	215
ISONEW	2015-06-12	12:44:14	6	1	P120	91	6	168
ISONEW	2015-06-12	12:44:14	39	2	P120	91	7	96
ISONEW	2015-06-12	12:44:14	8	1	P120	91	8	85
ISONEW	2015-06-12	12:44:14	32	2	NOSTIM	92	1	0
ISONEW	2015-06-12	12:44:14	42	1	NOSTIM	92	2	0
ISONEW	2015-06-12	12:44:14	35	2	NOSTIM	92	3	0
ISONEW	2015-06-12	12:44:14	4	1	NOSTIM	92	4	1
ISONEW	2015-06-12	12:44:14	53	2	NOSTIM	92	5	0
ISONEW	2015-06-12	12:44:14	6	1	NOSTIM	92	6	0
ISONEW	2015-06-12	12:44:14	39	2	NOSTIM	92	7	7
ISONEW	2015-06-12	12:44:14	8	1	NOSTIM	92	8	0
ISONEW	2015-06-12	12:44:14	32	2	PP3P120	93	1	22
ISONEW	2015-06-12	12:44:14	42	1	PP3P120	93	2	66
ISONEW	2015-06-12	12:44:14	35	2	PP3P120	93	3	5
ISONEW	2015-06-12	12:44:14	4	1	PP3P120	93	4	49
ISONEW	2015-06-12	12:44:14	53	2	PP3P120	93	5	42
ISONEW	2015-06-12	12:44:14	6	1	PP3P120	93	6	96
ISONEW	2015-06-12	12:44:14	39	2	PP3P120	93	7	107
ISONEW	2015-06-12	12:44:14	8	1	PP3P120	93	8	98
ISONEW	2015-06-12	12:44:14	32	2	NOSTIM	94	1	1
ISONEW	2015-06-12	12:44:14	42	1	NOSTIM	94	2	0
ISONEW	2015-06-12	12:44:14	35	2	NOSTIM	94	3	0
ISONEW	2015-06-12	12:44:14	4	1	NOSTIM	94	4	1
ISONEW	2015-06-12	12:44:14	53	2	NOSTIM	94	5	0
ISONEW	2015-06-12	12:44:14	6	1	NOSTIM	94	6	0
ISONEW	2015-06-12	12:44:14	39	2	NOSTIM	94	7	0
ISONEW	2015-06-12	12:44:14	8	1	NOSTIM	94	8	0
ISONEW	2015-06-12	12:44:14	32	2	PP12P120	95	1	6
ISONEW	2015-06-12	12:44:14	42	1	PP12P120	95	2	2
ISONEW	2015-06-12	12:44:14	35	2	PP12P120	95	3	12
ISONEW	2015-06-12	12:44:14	4	1	PP12P120	95	4	47
ISONEW	2015-06-12	12:44:14	53	2	PP12P120	95	5	30
ISONEW	2015-06-12	12:44:14	6	1	PP12P120	95	6	51
ISONEW	2015-06-12	12:44:14	39	2	PP12P120	95	7	79
ISONEW	2015-06-12	12:44:14	8	1	PP12P120	95	8	18
ISONEW	2015-06-12	12:44:14	32	2	NOSTIM	96	1	0
ISONEW	2015-06-12	12:44:14	42	1	NOSTIM	96	2	0
ISONEW	2015-06-12	12:44:14	35	2	NOSTIM	96	3	0
ISONEW	2015-06-12	12:44:14	4	1	NOSTIM	96	4	0
ISONEW	2015-06-12	12:44:14	53	2	NOSTIM	96	5	0
ISONEW	2015-06-12	12:44:14	6	1	NOSTIM	96	6	0
ISONEW	2015-06-12	12:44:14	39	2	NOSTIM	96	7	0
ISONEW	2015-06-12	12:44:14	8	1	NOSTIM	96	8	0
ISONEW	2015-06-12	12:44:14	32	2	PP6P120	97	1	65
ISONEW	2015-06-12	12:44:14	42	1	PP6P120	97	2	11
ISONEW	2015-06-12	12:44:14	35	2	PP6P120	97	3	30
ISONEW	2015-06-12	12:44:14	4	1	PP6P120	97	4	52
ISONEW	2015-06-12	12:44:14	53	2	PP6P120	97	5	62
ISONEW	2015-06-12	12:44:14	6	1	PP6P120	97	6	34
ISONEW	2015-06-12	12:44:14	39	2	PP6P120	97	7	157
ISONEW	2015-06-12	12:44:14	8	1	PP6P120	97	8	72
ISONEW	2015-06-12	12:44:14	32	2	NOSTIM	98	1	1
ISONEW	2015-06-12	12:44:14	42	1	NOSTIM	98	2	0
ISONEW	2015-06-12	12:44:14	35	2	NOSTIM	98	3	0
ISONEW	2015-06-12	12:44:14	4	1	NOSTIM	98	4	1
ISONEW	2015-06-12	12:44:14	53	2	NOSTIM	98	5	0
ISONEW	2015-06-12	12:44:14	6	1	NOSTIM	98	6	0
ISONEW	2015-06-12	12:44:14	39	2	NOSTIM	98	7	0
ISONEW	2015-06-12	12:44:14	8	1	NOSTIM	98	8	3
ISONEW	2015-06-12	12:44:14	32	2	P120	99	1	106
ISONEW	2015-06-12	12:44:14	42	1	P120	99	2	2
ISONEW	2015-06-12	12:44:14	35	2	P120	99	3	293
ISONEW	2015-06-12	12:44:14	4	1	P120	99	4	88
ISONEW	2015-06-12	12:44:14	53	2	P120	99	5	47
ISONEW	2015-06-12	12:44:14	6	1	P120	99	6	163
ISONEW	2015-06-12	12:44:14	39	2	P120	99	7	20
ISONEW	2015-06-12	12:44:14	8	1	P120	99	8	129
ISONEW	2015-06-12	12:44:14	32	2	NOSTIM	100	1	6
ISONEW	2015-06-12	12:44:14	42	1	NOSTIM	100	2	0
ISONEW	2015-06-12	12:44:14	35	2	NOSTIM	100	3	4
ISONEW	2015-06-12	12:44:14	4	1	NOSTIM	100	4	0
ISONEW	2015-06-12	12:44:14	53	2	NOSTIM	100	5	0
ISONEW	2015-06-12	12:44:14	6	1	NOSTIM	100	6	0
ISONEW	2015-06-12	12:44:14	39	2	NOSTIM	100	7	0
ISONEW	2015-06-12	12:44:14	8	1	NOSTIM	100	8	0
ISONEW	2015-06-12	12:44:14	32	2	PP3P120	101	1	82
ISONEW	2015-06-12	12:44:14	42	1	PP3P120	101	2	55
ISONEW	2015-06-12	12:44:14	35	2	PP3P120	101	3	2
ISONEW	2015-06-12	12:44:14	4	1	PP3P120	101	4	76
ISONEW	2015-06-12	12:44:14	53	2	PP3P120	101	5	32
ISONEW	2015-06-12	12:44:14	6	1	PP3P120	101	6	179
ISONEW	2015-06-12	12:44:14	39	2	PP3P120	101	7	55
ISONEW	2015-06-12	12:44:14	8	1	PP3P120	101	8	130
ISONEW	2015-06-12	12:44:14	32	2	NOSTIM	102	1	6
ISONEW	2015-06-12	12:44:14	42	1	NOSTIM	102	2	0
ISONEW	2015-06-12	12:44:14	35	2	NOSTIM	102	3	0
ISONEW	2015-06-12	12:44:14	4	1	NOSTIM	102	4	0
ISONEW	2015-06-12	12:44:14	53	2	NOSTIM	102	5	0
ISONEW	2015-06-12	12:44:14	6	1	NOSTIM	102	6	0
ISONEW	2015-06-12	12:44:14	39	2	NOSTIM	102	7	0
ISONEW	2015-06-12	12:44:14	8	1	NOSTIM	102	8	0
ISONEW	2015-06-12	12:44:14	32	2	PP12P120	103	1	49
ISONEW	2015-06-12	12:44:14	42	1	PP12P120	103	2	1
ISONEW	2015-06-12	12:44:14	35	2	PP12P120	103	3	60
ISONEW	2015-06-12	12:44:14	4	1	PP12P120	103	4	69
ISONEW	2015-06-12	12:44:14	53	2	PP12P120	103	5	16
ISONEW	2015-06-12	12:44:14	6	1	PP12P120	103	6	54
ISONEW	2015-06-12	12:44:14	39	2	PP12P120	103	7	118
ISONEW	2015-06-12	12:44:14	8	1	PP12P120	103	8	82
ISONEW	2015-06-12	12:44:14	32	2	NOSTIM	104	1	0
ISONEW	2015-06-12	12:44:14	42	1	NOSTIM	104	2	0
ISONEW	2015-06-12	12:44:14	35	2	NOSTIM	104	3	2
ISONEW	2015-06-12	12:44:14	4	1	NOSTIM	104	4	0
ISONEW	2015-06-12	12:44:14	53	2	NOSTIM	104	5	3
ISONEW	2015-06-12	12:44:14	6	1	NOSTIM	104	6	0
ISONEW	2015-06-12	12:44:14	39	2	NOSTIM	104	7	21
ISONEW	2015-06-12	12:44:14	8	1	NOSTIM	104	8	0
ISONEW	2015-06-12	12:44:14	32	2	P120	105	1	28
ISONEW	2015-06-12	12:44:14	42	1	P120	105	2	158
ISONEW	2015-06-12	12:44:14	35	2	P120	105	3	48
ISONEW	2015-06-12	12:44:14	4	1	P120	105	4	209
ISONEW	2015-06-12	12:44:14	53	2	P120	105	5	22
ISONEW	2015-06-12	12:44:14	6	1	P120	105	6	47
ISONEW	2015-06-12	12:44:14	39	2	P120	105	7	61
ISONEW	2015-06-12	12:44:14	8	1	P120	105	8	42
ISONEW	2015-06-12	12:44:14	32	2	NOSTIM	106	1	2
ISONEW	2015-06-12	12:44:14	42	1	NOSTIM	106	2	0
ISONEW	2015-06-12	12:44:14	35	2	NOSTIM	106	3	0
ISONEW	2015-06-12	12:44:14	4	1	NOSTIM	106	4	0
ISONEW	2015-06-12	12:44:14	53	2	NOSTIM	106	5	0
ISONEW	2015-06-12	12:44:14	6	1	NOSTIM	106	6	0
ISONEW	2015-06-12	12:44:14	39	2	NOSTIM	106	7	2
ISONEW	2015-06-12	12:44:14	8	1	NOSTIM	106	8	0
ISONEW	2015-06-12	12:44:14	32	2	PP6P120	107	1	123
ISONEW	2015-06-12	12:44:14	42	1	PP6P120	107	2	33
ISONEW	2015-06-12	12:44:14	35	2	PP6P120	107	3	11
ISONEW	2015-06-12	12:44:14	4	1	PP6P120	107	4	39
ISONEW	2015-06-12	12:44:14	53	2	PP6P120	107	5	57
ISONEW	2015-06-12	12:44:14	6	1	PP6P120	107	6	74
ISONEW	2015-06-12	12:44:14	39	2	PP6P120	107	7	180
ISONEW	2015-06-12	12:44:14	8	1	PP6P120	107	8	39
ISONEW	2015-06-12	12:44:14	32	2	NOSTIM	108	1	0
ISONEW	2015-06-12	12:44:14	42	1	NOSTIM	108	2	0
ISONEW	2015-06-12	12:44:14	35	2	NOSTIM	108	3	0
ISONEW	2015-06-12	12:44:14	4	1	NOSTIM	108	4	0
ISONEW	2015-06-12	12:44:14	53	2	NOSTIM	108	5	1
ISONEW	2015-06-12	12:44:14	6	1	NOSTIM	108	6	0
ISONEW	2015-06-12	12:44:14	39	2	NOSTIM	108	7	0
ISONEW	2015-06-12	12:44:14	8	1	NOSTIM	108	8	2
ISONEW	2015-06-12	12:44:14	32	2	P120	109	1	13
ISONEW	2015-06-12	12:44:14	42	1	P120	109	2	191
ISONEW	2015-06-12	12:44:14	35	2	P120	109	3	47
ISONEW	2015-06-12	12:44:14	4	1	P120	109	4	319
ISONEW	2015-06-12	12:44:14	53	2	P120	109	5	60
ISONEW	2015-06-12	12:44:14	6	1	P120	109	6	114
ISONEW	2015-06-12	12:44:14	39	2	P120	109	7	140
ISONEW	2015-06-12	12:44:14	8	1	P120	109	8	87
ISONEW	2015-06-12	12:44:14	32	2	NOSTIM	110	1	1
ISONEW	2015-06-12	12:44:14	42	1	NOSTIM	110	2	0
ISONEW	2015-06-12	12:44:14	35	2	NOSTIM	110	3	0
ISONEW	2015-06-12	12:44:14	4	1	NOSTIM	110	4	0
ISONEW	2015-06-12	12:44:14	53	2	NOSTIM	110	5	0
ISONEW	2015-06-12	12:44:14	6	1	NOSTIM	110	6	0
ISONEW	2015-06-12	12:44:14	39	2	NOSTIM	110	7	4
ISONEW	2015-06-12	12:44:14	8	1	NOSTIM	110	8	0
ISONEW	2015-06-12	12:44:14	32	2	P120	111	1	45
ISONEW	2015-06-12	12:44:14	42	1	P120	111	2	106
ISONEW	2015-06-12	12:44:14	35	2	P120	111	3	225
ISONEW	2015-06-12	12:44:14	4	1	P120	111	4	286
ISONEW	2015-06-12	12:44:14	53	2	P120	111	5	79
ISONEW	2015-06-12	12:44:14	6	1	P120	111	6	160
ISONEW	2015-06-12	12:44:14	39	2	P120	111	7	258
ISONEW	2015-06-12	12:44:14	8	1	P120	111	8	133
ISONEW	2015-06-12	12:44:14	32	2	NOSTIM	112	1	0
ISONEW	2015-06-12	12:44:14	42	1	NOSTIM	112	2	0
ISONEW	2015-06-12	12:44:14	35	2	NOSTIM	112	3	2
ISONEW	2015-06-12	12:44:14	4	1	NOSTIM	112	4	0
ISONEW	2015-06-12	12:44:14	53	2	NOSTIM	112	5	1
ISONEW	2015-06-12	12:44:14	6	1	NOSTIM	112	6	0
ISONEW	2015-06-12	12:44:14	39	2	NOSTIM	112	7	4
ISONEW	2015-06-12	12:44:14	8	1	NOSTIM	112	8	1
ISONEW	2015-06-12	12:44:14	32	2	P120	113	1	76
ISONEW	2015-06-12	12:44:14	42	1	P120	113	2	15
ISONEW	2015-06-12	12:44:14	35	2	P120	113	3	18
ISONEW	2015-06-12	12:44:14	4	1	P120	113	4	315
ISONEW	2015-06-12	12:44:14	53	2	P120	113	5	68
ISONEW	2015-06-12	12:44:14	6	1	P120	113	6	375
ISONEW	2015-06-12	12:44:14	39	2	P120	113	7	126
ISONEW	2015-06-12	12:44:14	8	1	P120	113	8	143
ISONEW	2015-06-12	12:44:14	32	2	NOSTIM	114	1	0
ISONEW	2015-06-12	12:44:14	42	1	NOSTIM	114	2	0
ISONEW	2015-06-12	12:44:14	35	2	NOSTIM	114	3	0
ISONEW	2015-06-12	12:44:14	4	1	NOSTIM	114	4	0
ISONEW	2015-06-12	12:44:14	53	2	NOSTIM	114	5	0
ISONEW	2015-06-12	12:44:14	6	1	NOSTIM	114	6	0
ISONEW	2015-06-12	12:44:14	39	2	NOSTIM	114	7	0
ISONEW	2015-06-12	12:44:14	8	1	NOSTIM	114	8	0
ISONEW	2015-06-12	12:44:14	32	2	P120	115	1	45
ISONEW	2015-06-12	12:44:14	42	1	P120	115	2	292
ISONEW	2015-06-12	12:44:14	35	2	P120	115	3	59
ISONEW	2015-06-12	12:44:14	4	1	P120	115	4	88
ISONEW	2015-06-12	12:44:14	53	2	P120	115	5	28
ISONEW	2015-06-12	12:44:14	6	1	P120	115	6	628
ISONEW	2015-06-12	12:44:14	39	2	P120	115	7	106
ISONEW	2015-06-12	12:44:14	8	1	P120	115	8	260
ISONEW	2015-06-12	12:44:14	32	2	NOSTIM	116	1	0
ISONEW	2015-06-12	12:44:14	42	1	NOSTIM	116	2	0
ISONEW	2015-06-12	12:44:14	35	2	NOSTIM	116	3	2
ISONEW	2015-06-12	12:44:14	4	1	NOSTIM	116	4	0
ISONEW	2015-06-12	12:44:14	53	2	NOSTIM	116	5	0
ISONEW	2015-06-12	12:44:14	6	1	NOSTIM	116	6	0
ISONEW	2015-06-12	12:44:14	39	2	NOSTIM	116	7	10
ISONEW	2015-06-12	12:44:14	8	1	NOSTIM	116	8	0
ISONEW	2015-06-12	12:44:14	32	2	P120	117	1	31
ISONEW	2015-06-12	12:44:14	42	1	P120	117	2	285
ISONEW	2015-06-12	12:44:14	35	2	P120	117	3	44
ISONEW	2015-06-12	12:44:14	4	1	P120	117	4	349
ISONEW	2015-06-12	12:44:14	53	2	P120	117	5	49
ISONEW	2015-06-12	12:44:14	6	1	P120	117	6	215
ISONEW	2015-06-12	12:44:14	39	2	P120	117	7	46
ISONEW	2015-06-12	12:44:14	8	1	P120	117	8	33
ISONEW	2015-06-12	12:44:14	32	2	NOSTIM	118	1	30
ISONEW	2015-06-12	12:44:14	42	1	NOSTIM	118	2	0
ISONEW	2015-06-12	12:44:14	35	2	NOSTIM	118	3	0
ISONEW	2015-06-12	12:44:14	4	1	NOSTIM	118	4	2
ISONEW	2015-06-12	12:44:14	53	2	NOSTIM	118	5	0
ISONEW	2015-06-12	12:44:14	6	1	NOSTIM	118	6	0
ISONEW	2015-06-12	12:44:14	39	2	NOSTIM	118	7	0
ISONEW	2015-06-12	12:44:14	8	1	NOSTIM	118	8	0
ISONEW	2015-06-12	12:44:14	32	2	P120	119	1	29
ISONEW	2015-06-12	12:44:14	42	1	P120	119	2	79
ISONEW	2015-06-12	12:44:14	35	2	P120	119	3	94
ISONEW	2015-06-12	12:44:14	4	1	P120	119	4	34
ISONEW	2015-06-12	12:44:14	53	2	P120	119	5	69
ISONEW	2015-06-12	12:44:14	6	1	P120	119	6	98
ISONEW	2015-06-12	12:44:14	39	2	P120	119	7	97
ISONEW	2015-06-12	12:44:14	8	1	P120	119	8	65
ISONEW	2015-06-12	12:44:14	32	2	NOSTIM	120	1	0
ISONEW	2015-06-12	12:44:14	42	1	NOSTIM	120	2	0
ISONEW	2015-06-12	12:44:14	35	2	NOSTIM	120	3	0
ISONEW	2015-06-12	12:44:14	4	1	NOSTIM	120	4	0
ISONEW	2015-06-12	12:44:14	53	2	NOSTIM	120	5	0
ISONEW	2015-06-12	12:44:14	6	1	NOSTIM	120	6	0
ISONEW	2015-06-12	12:44:14	39	2	NOSTIM	120	7	36
ISONEW	2015-06-12	12:44:14	8	1	NOSTIM	120	8	0
ISONEW	2015-06-12	13:21:49	9	1	P120	1	1	435
ISONEW	2015-06-12	13:21:49	18	2	P120	1	2	147
ISONEW	2015-06-12	13:21:49	3	1	P120	1	3	741
ISONEW	2015-06-12	13:21:49	52	2	P120	1	4	362
ISONEW	2015-06-12	13:21:49	5	1	P120	1	5	231
ISONEW	2015-06-12	13:21:49	30	2	P120	1	6	127
ISONEW	2015-06-12	13:21:49	15	2	P120	1	7	173
ISONEW	2015-06-12	13:21:49	48	1	P120	1	8	484
ISONEW	2015-06-12	13:21:49	9	1	NOSTIM	2	1	0
ISONEW	2015-06-12	13:21:49	18	2	NOSTIM	2	2	0
ISONEW	2015-06-12	13:21:49	3	1	NOSTIM	2	3	0
ISONEW	2015-06-12	13:21:49	52	2	NOSTIM	2	4	0
ISONEW	2015-06-12	13:21:49	5	1	NOSTIM	2	5	0
ISONEW	2015-06-12	13:21:49	30	2	NOSTIM	2	6	0
ISONEW	2015-06-12	13:21:49	15	2	NOSTIM	2	7	0
ISONEW	2015-06-12	13:21:49	48	1	NOSTIM	2	8	0
ISONEW	2015-06-12	13:21:49	9	1	P120	3	1	1491
ISONEW	2015-06-12	13:21:49	18	2	P120	3	2	352
ISONEW	2015-06-12	13:21:49	3	1	P120	3	3	320
ISONEW	2015-06-12	13:21:49	52	2	P120	3	4	594
ISONEW	2015-06-12	13:21:49	5	1	P120	3	5	190
ISONEW	2015-06-12	13:21:49	30	2	P120	3	6	55
ISONEW	2015-06-12	13:21:49	15	2	P120	3	7	99
ISONEW	2015-06-12	13:21:49	48	1	P120	3	8	1962
ISONEW	2015-06-12	13:21:49	9	1	NOSTIM	4	1	0
ISONEW	2015-06-12	13:21:49	18	2	NOSTIM	4	2	0
ISONEW	2015-06-12	13:21:49	3	1	NOSTIM	4	3	0
ISONEW	2015-06-12	13:21:49	52	2	NOSTIM	4	4	0
ISONEW	2015-06-12	13:21:49	5	1	NOSTIM	4	5	0
ISONEW	2015-06-12	13:21:49	30	2	NOSTIM	4	6	0
ISONEW	2015-06-12	13:21:49	15	2	NOSTIM	4	7	0
ISONEW	2015-06-12	13:21:49	48	1	NOSTIM	4	8	0
ISONEW	2015-06-12	13:21:49	9	1	P120	5	1	576
ISONEW	2015-06-12	13:21:49	18	2	P120	5	2	31
ISONEW	2015-06-12	13:21:49	3	1	P120	5	3	329
ISONEW	2015-06-12	13:21:49	52	2	P120	5	4	499
ISONEW	2015-06-12	13:21:49	5	1	P120	5	5	236
ISONEW	2015-06-12	13:21:49	30	2	P120	5	6	207
ISONEW	2015-06-12	13:21:49	15	2	P120	5	7	284
ISONEW	2015-06-12	13:21:49	48	1	P120	5	8	1032
ISONEW	2015-06-12	13:21:49	9	1	NOSTIM	6	1	0
ISONEW	2015-06-12	13:21:49	18	2	NOSTIM	6	2	3
ISONEW	2015-06-12	13:21:49	3	1	NOSTIM	6	3	0
ISONEW	2015-06-12	13:21:49	52	2	NOSTIM	6	4	0
ISONEW	2015-06-12	13:21:49	5	1	NOSTIM	6	5	0
ISONEW	2015-06-12	13:21:49	30	2	NOSTIM	6	6	0
ISONEW	2015-06-12	13:21:49	15	2	NOSTIM	6	7	0
ISONEW	2015-06-12	13:21:49	48	1	NOSTIM	6	8	3
ISONEW	2015-06-12	13:21:49	9	1	P120	7	1	1441
ISONEW	2015-06-12	13:21:49	18	2	P120	7	2	89
ISONEW	2015-06-12	13:21:49	3	1	P120	7	3	414
ISONEW	2015-06-12	13:21:49	52	2	P120	7	4	382
ISONEW	2015-06-12	13:21:49	5	1	P120	7	5	109
ISONEW	2015-06-12	13:21:49	30	2	P120	7	6	63
ISONEW	2015-06-12	13:21:49	15	2	P120	7	7	92
ISONEW	2015-06-12	13:21:49	48	1	P120	7	8	694
ISONEW	2015-06-12	13:21:49	9	1	NOSTIM	8	1	0
ISONEW	2015-06-12	13:21:49	18	2	NOSTIM	8	2	0
ISONEW	2015-06-12	13:21:49	3	1	NOSTIM	8	3	0
ISONEW	2015-06-12	13:21:49	52	2	NOSTIM	8	4	0
ISONEW	2015-06-12	13:21:49	5	1	NOSTIM	8	5	0
ISONEW	2015-06-12	13:21:49	30	2	NOSTIM	8	6	0
ISONEW	2015-06-12	13:21:49	15	2	NOSTIM	8	7	0
ISONEW	2015-06-12	13:21:49	48	1	NOSTIM	8	8	0
ISONEW	2015-06-12	13:21:49	9	1	P120	9	1	506
ISONEW	2015-06-12	13:21:49	18	2	P120	9	2	72
ISONEW	2015-06-12	13:21:49	3	1	P120	9	3	182
ISONEW	2015-06-12	13:21:49	52	2	P120	9	4	556
ISONEW	2015-06-12	13:21:49	5	1	P120	9	5	102
ISONEW	2015-06-12	13:21:49	30	2	P120	9	6	59
ISONEW	2015-06-12	13:21:49	15	2	P120	9	7	111
ISONEW	2015-06-12	13:21:49	48	1	P120	9	8	264
ISONEW	2015-06-12	13:21:49	9	1	NOSTIM	10	1	0
ISONEW	2015-06-12	13:21:49	18	2	NOSTIM	10	2	20
ISONEW	2015-06-12	13:21:49	3	1	NOSTIM	10	3	0
ISONEW	2015-06-12	13:21:49	52	2	NOSTIM	10	4	1
ISONEW	2015-06-12	13:21:49	5	1	NOSTIM	10	5	0
ISONEW	2015-06-12	13:21:49	30	2	NOSTIM	10	6	8
ISONEW	2015-06-12	13:21:49	15	2	NOSTIM	10	7	1
[truncated: 881 more rows]
